# Supplementary material for: Antioxidant properties can be tuned in the presence of an external electric field: accurate computation of O–H BDE with range-separated density functionals
Source: Royal Society of Chemistry journal article supplement (doi:10.1039/c5ra13462e), 2015-01-01

**Supporting Information**

on

**Antioxidant properties can be tuned in the presence of external electric field: Accurate computation of O-H BDE with range-separated density functionals**

Manash Protim Borpuzari, Rakiba Rohman and Rahul Kar\*

Department of Chemistry, Dibrugarh University, Dibrugarh, Assam, India-786004

\*email: [rahul.kar.dib@gmail.com](mailto:rahul.kar.dib@gmail.com)

## Optimized Structures of Gallic Acid and Caffeic Acid with LC-BLYP/6-311++G(3df,2p)

### Gallic Acid (Neutral)

x- 0.010

C -0.9442993342 -1.1425110732 0.0020197783  
C -1.6714249843 0.0235205663 0.0001991428  
C -1.0335866321 1.2401570759 -0.0041590457  
C 0.3402499848 1.2933746176 -0.0067108056  
C 1.0538735592 0.1175716864 -0.0048858422  
C 0.4199053217 -1.1066690796 -0.0005360855  
O -3.0377434478 -0.0063513096 0.0027937994  
O -1.774955043 2.3732880527 -0.0058168001  
C 2.5410933448 0.0846297597 -0.0074030152  
O 3.092602187 1.2867999916 -0.0108334101  
O -1.6885387869 -2.2886056774 0.0064807576  
O 3.158370364 -0.933888322 -0.0063774063  
H 1.0248945092 -2.004409946 0.0007807023  
H 0.8471045968 2.2466495479 -0.0100166237  
H -1.1106693067 -3.0568416921 0.0083346273  
H -3.2991291432 -0.9340271412 0.0064104249  
H -2.7046120549 2.1267356648 -0.0028727192  
H 4.0584258654 1.1918022781 -0.012113479

x+ 0.10

C -0.9394871461 -1.1749857647 0.0023985575  
C -1.6703970723 -0.0011876263 0.0006281601  
C -1.0234556773 1.2205078242 -0.0037202539  
C 0.347901317 1.264763173 -0.0062928872  
C 1.0702392632 0.087993318 -0.0044582733  
C 0.4291545701 -1.1390554191 -0.0000917301  
O -3.0005633303 0.0189813815 0.0029223391  
O -1.7314684186 2.3525646966 -0.0054335896  
C 2.5271330905 0.107823203 -0.0071553321  
O 3.0617047141 1.3422258937 -0.0118456117  
O -1.6905104131 -2.2961194732 0.0066334033  
O 3.2589702375 -0.8493894341 -0.0056059683  
H 1.0124784696 -2.0491037564 0.0012307941  
H 0.8364018567 2.2259679821 -0.0097816953  
H -1.166580052 -3.0998415959 0.0073509417  
H -3.3847369687 -0.868258537 0.0055377295  
H -2.6804739909 2.1629465443 -0.0035792967  
H 4.0152505508 1.2053925901 -0.0134432871

x- 0.002

C -0.942994 -1.155173 0.002198  
C -1.670193 0.013545 0.000413  
C -1.029064 1.23129 -0.003938  
C 0.343908 1.280847 -0.00651  
C 1.058581 0.104764 -0.004696  
C 0.423377 -1.119932 -0.000345  
O -3.022444 0.005483 0.002865  
O -1.75525 2.364692 -0.005621  
C 2.534676 0.093843 -0.007302  
O 3.077489 1.309107 -0.011308  
O -1.688631 -2.291862 0.006536  
O 3.19799 -0.900429 -0.005999  
H 1.01862 -2.022999 0.000968  
H 0.843598 2.237002 -0.009892  
H -1.130319 -3.073309 0.007909  
H -3.333149 -0.907439 0.005967  
H -2.693024 2.14187 -0.003242  
H 4.03839 1.199924 -0.012711

x+ 0.002

C -0.9421149834 -1.1616184288 0.0022907958  
C -1.6700527802 0.0085283438 0.0004512641  
C -1.0272052488 1.2272909156 -0.0037536595  
C 0.3453194413 1.2751043329 -0.0061208183  
C 1.0617323131 0.0989365608 -0.0042217648  
C 0.4252405124 -1.1262098666 -0.0000287231  
O -3.0151316462 0.0106065928 0.0026462515  
O -1.7468111462 2.3603118434 -0.0055100804  
C 2.5321570274 0.0984950138 -0.0065814694  
O 3.0718954963 1.3197525893 -0.0118836895  
O -1.6889349602 -2.293252884 0.0064352994  
O 3.2182137212 -0.8834906669 -0.006024484  
H 1.0160987348 -2.0317980843 0.0013560595  
H 0.841149092 2.2329552755 -0.0094221273  
H -1.1413677045 -3.0818118732 0.0076044461  
H -3.3506294823 -0.8941075488 0.0054481378  
H -2.6884664768 2.1489050986 -0.0034951464  
H 4.0304690901 1.2026277861 -0.0138962917

x- 0.004

C -0.9433734359 -1.1519912988 0.0021569224  
C -1.6703907339 0.0160305501 0.0003654439  
C -1.0301203645 1.2334027554 -0.0039871464

C 0.3430617313 1.2838444045 -0.0065556657  
C 1.0572092995 0.1078369928 -0.0047406221  
C 0.4224742589 -1.1166754239 -0.0003910125  
O -3.026170923 0.0026983422 0.0028491618  
O -1.7598668101 2.3668296332 -0.0056644408  
C 2.536136311 0.0915383332 -0.0073271389  
O 3.0808995823 1.3035894731 -0.0111936368  
O -1.6885395501 -2.2910722428 0.0065215473  
O 3.1880308357 -0.9088343619 -0.0060916785  
H 1.0200072693 -2.0184678316 0.0009216964  
H 0.8445778921 2.2392356126 -0.0099183115  
H -1.1251411234 -3.0691189205 0.0080144879  
H -3.3245735957 -0.9140985824 0.0060666107  
H -2.6956712616 2.1382315395 -0.0031639108  
H 4.0430116181 1.1982460253 -0.0125683063

x+ 0.004

C -0.9415516187 -1.164859682 0.0023049535  
C -1.6700270777 0.0061350035 0.0005337479  
C -1.0261305084 1.2254390265 -0.0038135228  
C 0.3461591147 1.2724037219 -0.0063899451  
C 1.0635998247 0.0960397797 -0.004570402  
C 0.426202873 -1.1295391667 -0.0002153812  
O -3.0114972584 0.0129960796 0.0029021589  
O -1.7425415072 2.3584261374 -0.0055109529  
C 2.5307088339 0.1007659212 -0.0072273097  
O 3.068624802 1.3255800253 -0.0116122663  
O -1.6892352595 -2.2941214525 0.0065800608  
O 3.228140744 -0.8750701681 -0.0057627288  
H 1.0151136915 -2.0362310007 0.0011004886  
H 0.8402703172 2.2309996139 -0.0098250149  
H -1.147133053 -3.0862333947 0.0076191735  
H -3.3590116626 -0.8875799925 0.0057148285  
H -2.6860354627 2.1524504242 -0.0034314171  
H 4.0259042071 1.203624124 -0.0131024709

x- 0.006

C -0.9437143793 -1.148824781 0.0021139181  
C -1.670659935 0.018521748 0.0003140856  
C -1.0312227896 1.2355867916 -0.0040403464  
C 0.3421705876 1.2869298174 -0.0066043454  
C 1.0559726518 0.1109930517 -0.0047873988  
C 0.4215943101 -1.1133836272 -0.0004381113  
O -3.0299551091 -0.0002064184 0.0028319206  
O -1.764684666 2.3689783932 -0.0057118256  
C 2.5376859004 0.0892364061 -0.0073527408

O 3.0845482588 1.2980401196 -0.0110754875  
O -1.6884965488 -2.2902650265 0.0065077345  
O 3.1781121222 -0.9172108104 -0.0061869082  
H 1.0215116016 -2.0138651648 0.0008750118  
H 0.8454923465 2.2415848446 -0.0099482913  
H -1.1201523757 -3.0649809406 0.0081206014  
H -3.3160398219 -0.9207546938 0.006174271  
H -2.6984826935 2.1345055216 -0.003077506  
H 4.04788154 1.1963397689 -0.0124205816

x+ 0.006

C -0.9409452172 -1.1681740514 0.0023369439  
C -1.6700885629 0.0036822732 0.0005676153  
C -1.0252125652 1.2236772858 -0.0037793396  
C 0.3468086804 1.2697619205 -0.0063553486  
C 1.0656133237 0.0932801548 -0.0045320153  
C 0.4271783518 -1.1327161519 -0.0001742151  
O -3.0078689417 0.0151879367 0.0029107242  
O -1.7386692455 2.3564125599 -0.0054818022  
C 2.5294880085 0.1031029559 -0.0072036854  
O 3.066091942 1.3310971905 -0.0116981949  
O -1.6895785045 -2.2948234747 0.0065958507  
O 3.2383248307 -0.8665426109 -0.0057003378  
H 1.0141508808 -2.0405519766 0.0011428951  
H 0.8390536915 2.2292088337 -0.0098080461  
H -1.1532884708 -3.090688977 0.0075295345  
H -3.3676252525 -0.8810447284 0.005647949  
H -2.6840192865 2.1559229648 -0.0034838737  
H 4.0221473373 1.204432895 -0.013220654

x- 0.008

C -0.9440215227 -1.1456665822 0.0020682887  
C -1.671003694 0.0210184111 0.000258734  
C -1.032376489 1.237839075 -0.0040976198  
C 0.3412337921 1.29010569 -0.0066560391  
C 1.054863073 0.1142365604 -0.0048358005  
C 0.4207378371 -1.110050135 -0.0004864286  
O -3.0338086715 -0.00322474 0.0028134674  
O -1.7697113295 2.3711326525 -0.0057626878  
C 2.5393347553 0.0869344617 -0.0073781881  
O 3.0884454435 1.2924474493 -0.0109548933  
O -1.6884977096 -2.2894423735 0.0064942222  
O 3.1682272321 -0.9255611299 -0.0062829032  
H 1.0231387272 -2.0091821693 0.0008280213

H 0.8463364558 2.2440545057 -0.0099810436  
H -1.1153339639 -3.0608900854 0.0082273255  
H -3.3075558509 -0.927399503 0.0062892395  
H -2.7014616326 2.1306777116 -0.0029810274  
H 4.0530145476 1.1941952011 -0.0122686672

x+ 0.008

C -0.9402612899 -1.1715448198 0.002368049  
C -1.6702104534 0.0012410259 0.0005988024  
C -1.0243204138 1.2220282504 -0.0037483881  
C 0.3473936706 1.2672136193 -0.0063227908  
C 1.067819431 0.0905970251 -0.0044943858  
C 0.4281638575 -1.1358863984 -0.0001329572  
O -3.0042287727 0.0171936594 0.0029169007  
O -1.734975692 2.3544540375 -0.0054563339  
C 2.52829903 0.1054534137 -0.0071793459  
O 3.0637763021 1.3366405742 -0.0117750225  
O -1.6900005871 -2.2954913824 0.0066135377  
O 3.2485921137 -0.8579851635 -0.0056501177  
H 1.0132747307 -2.044840608 0.0011863455  
H 0.8377683619 2.2275303465 -0.0097931932  
H -1.1597550133 -3.0952205465 0.0074413288  
H -3.3762032893 -0.8745919966 0.0055888044  
H -2.6821608643 2.1594066123 -0.0035330856  
H 4.0185898783 1.2050273509 -0.0133341477

Zero Field

C -0.9425689036 -1.1583751222 0.0022362189  
C -1.6700658504 0.011065172 0.0004575719  
C -1.0280493776 1.22925432 -0.0038924016  
C 0.3447081456 1.277936365 -0.0064676475  
C 1.0600977975 0.1017716766 -0.0046525344  
C 0.4243008292 -1.1231587184 -0.0003002421  
O -3.0187617453 0.0081369214 0.0028806848  
O -1.7508270708 2.3625705989 -0.0055800614  
C 2.5332931073 0.0961522815 -0.0072771279  
O 3.0743094117 1.3146066717 -0.0114187473  
O -1.6887776535 -2.2926327792 0.0065515926  
O 3.2079987558 -0.8919911645 -0.0059090597  
H 1.0173434861 -2.0274684264 0.0010141541  
H 0.8425550776 2.2348811908 -0.0098678283  
H -1.1357067912 -3.0775564628 0.0078040694  
H -3.3417566506 -0.9007862264 0.0058742704  
H -2.6905368491 2.1454385934 -0.0033111618

H 4.0340052816 1.2013801088 -0.0128477501

y- 0.010

C -0.9480915117 -1.1567939838 0.0019169108  
C -1.6803262996 0.0074234381 0.0001609666  
C -1.0347662134 1.2278237325 -0.0041583287  
C 0.3426785884 1.2681567945 -0.0066679521  
C 1.0575016692 0.0941429278 -0.0049104971  
C 0.417276531 -1.1291189989 -0.0006237593  
O -3.030169041 0.0028505636 0.002641111  
O -1.7253846529 2.3649311141 -0.0058649262  
C 2.5332820294 0.0881873225 -0.0074277759  
O 3.0577318729 1.2984242212 -0.0106901558  
O -1.6782742449 -2.3190055427 0.0063632308  
O 3.2010881465 -0.9127862567 -0.0066358357  
H 1.0089786943 -2.0348788521 0.0007126335  
H 0.8356366521 2.2288441634 -0.0098773775  
H -1.0754261257 -3.0636718647 0.0088495749  
H -3.355417398 -0.9021168301 0.0065925575  
H -2.6771965833 2.2098514055 -0.0031082995  
H 4.0224388868 1.2389616459 -0.011978077

y+ 0.010

C -0.9387521181 -1.1619640391 0.0023799269  
C -1.6615719072 0.0140071433 0.000641806  
C -1.0220515437 1.2308800999 -0.0036488198  
C 0.3475341557 1.2864202991 -0.0062545768  
C 1.0625417995 0.1072156886 -0.0044233549  
C 0.4307403319 -1.1202316002 -0.0001111559  
O -3.0092855278 0.013275362 0.0029811387  
O -1.7734881996 2.362079143 -0.0052810231  
C 2.533874874 0.1035799895 -0.0070751731  
O 3.089693909 1.3325543391 -0.0121001054  
O -1.6983075442 -2.2706507494 0.0065169309  
O 3.2166867838 -0.8714789711 -0.0051230317  
H 1.0241363127 -2.0247627187 0.0011375028  
H 0.850481907 2.2404683669 -0.0097763583  
H -1.1937982936 -3.0915045691 0.0072670759  
H -3.3300962397 -0.9000495913 0.0053777205  
H -2.6996137719 2.0899397977 -0.0034847756  
H 4.042836072 1.1714470098 -0.0137297271

y- 0.002

C -0.9435309588 -1.1578677362 0.002183961  
C -1.6720156358 0.0104169879 0.0004046481  
C -1.0293440921 1.2289624672 -0.0039443781  
C 0.3442335484 1.2760986689 -0.0065068473  
C 1.0595904048 0.1004252121 -0.0047000591  
C 0.4229435026 -1.1241141625 -0.0003555296  
O -3.0209031284 0.0070837123 0.0028392304  
O -1.7459613249 2.3629209892 -0.0056392546  
C 2.5332551179 0.094588685 -0.0073089709  
O 3.0711008845 1.3112233427 -0.011269576  
O -1.6867537662 -2.2975248411 0.0065236614  
O 3.2064322324 -0.8961814879 -0.0060722484  
H 1.0158000559 -2.0285715271 0.0009639296  
H 0.8410542625 2.2337442282 -0.0098722806  
H -1.1237823563 -3.0747453806 0.0079946184  
H -3.3442917175 -0.9010272169 0.005996082  
H -2.6882163889 2.157532426 -0.0032697723  
H 4.0319503599 1.2082606327 -0.012673214

y+ 0.002

C -0.9416730858 -1.1589512917 0.0022817348  
C -1.6681941712 0.0116875459 0.0005069472  
C -1.0267837909 1.2295466513 -0.0038389702  
C 0.3452057594 1.2797582087 -0.0064256771  
C 1.060585313 0.1030598296 -0.0046035132  
C 0.4256328345 -1.1222976172 -0.0002487477  
O -3.0167154666 0.0091796501 0.0029171819  
O -1.7555890987 2.3622969449 -0.0055166377  
C 2.5333348725 0.0976529129 -0.007237884  
O 3.0774868689 1.3180295815 -0.0115765487  
O -1.6907249902 -2.2879377162 0.0065699874  
O 3.2095935583 -0.887857177 -0.0057324408  
H 1.0188263268 -2.0265251592 0.0010601704  
H 0.844077684 2.2360337536 -0.0098577257  
H -1.1474450587 -3.0803586404 0.0076259013  
H -3.3393198321 -0.9005717247 0.0057571395  
H -2.692701204 2.1337159365 -0.0033536059  
H 4.0359644808 1.1947633114 -0.0130333114

y- 0.004

C -0.9445658328 -1.1574658223 0.0021273732  
C -1.6740024272 0.0097278039 0.0003499033  
C -1.0306593906 1.2286722297 -0.0039963807



C 0.343796653 1.2741924529 -0.0065467162  
C 1.0590798626 0.0989804006 -0.0047499522  
C 0.4215637664 -1.1251898383 -0.0004145283  
O -3.0231024847 0.0060441386 0.0027963331  
O -1.7409900101 2.3633266376 -0.0056971068  
C 2.5332359755 0.0930251971 -0.0073412013  
O 3.0678334981 1.3079270397 -0.0111250753  
O -1.6846991039 -2.3026013607 0.0064930472  
O 3.204977833 -0.9003289956 -0.0062219914  
H 1.0141941445 -2.0298652652 0.0009104738  
H 0.8396272842 2.2325586615 -0.009876832  
H -1.1118251739 -3.071967311 0.0081879368  
H -3.3469333709 -0.901258976 0.0061267775  
H -2.685736231 2.1699943778 -0.0032284553  
H 4.0297660078 1.2154536297 -0.0124996054

y+ 0.004

C -0.9408435413 -1.1595576076 0.0022964888  
C -1.6665898855 0.0123487948 0.000521351  
C -1.0255137859 1.2298967198 -0.0037804878  
C 0.345859611 1.2813094827 -0.00632979  
C 1.0612146184 0.1039880758 -0.0044944149  
C 0.4269290277 -1.1219435827 -0.0001866565  
O -3.014756219 0.0101213388 0.0028764428  
O -1.7598681127 2.362318151 -0.0054537006  
C 2.5334222099 0.0991945159 -0.0070828186  
O 3.0801033653 1.322033069 -0.0117480365  
O -1.6929303562 -2.2833668588 0.0065082577  
O 3.2113660268 -0.8837098094 -0.0056444535  
H 1.0202236961 -2.026140927 0.0011083932  
H 0.845831441 2.2369558241 -0.0097541863  
H -1.1593517331 -3.0830320839 0.0075948565  
H -3.3365734399 -0.9005975148 0.0056088179  
H -2.6942504116 2.1225126581 -0.0033976062  
H 4.0372884889 1.1888947543 -0.013348457

y- 0.006

C -0.9456708114 -1.1571525915 0.002064783  
C -1.6760490252 0.0090009884 0.0002918374  
C -1.0320012605 1.2283851324 -0.0040488268  
C 0.3433912334 1.2722364838 -0.0065866779  
C 1.0585607789 0.0974534533 -0.0048014364  
C 0.4201595371 -1.1263793559 -0.0004782539  
O -3.0253794404 0.0049967681 0.0027499207

O -1.7359070017 2.3637972519 -0.0057535328  
C 2.5332333274 0.0914351263 -0.0073717302  
O 3.0645182106 1.3046943872 -0.0109820512  
O -1.6825978127 -2.3078720029 0.0064567719  
O 3.2036002535 -0.9044807178 -0.0063639906  
H 1.0125233139 -2.0313434938 0.0008517089  
H 0.8382479587 2.2313499617 -0.0098797187  
H -1.0997736966 -3.0691976716 0.0083921741  
H -3.3496718199 -0.9015114455 0.006267771  
H -2.6830815761 2.1828543544 -0.0031878984  
H 4.027458831 1.2229583717 -0.0123268503

y+ 0.006

C -0.9400688011 -1.1602557774 0.0023260302  
C -1.6648656066 0.0129175784 0.0005623816  
C -1.0243425085 1.2302138824 -0.0037378227  
C 0.3463856798 1.283021745 -0.0063072007  
C 1.0616739706 0.1051241441 -0.0044731295  
C 0.4282230911 -1.1212931651 -0.0001615899  
O -3.0128690755 0.0111496573 0.0029139327  
O -1.7644677103 2.3621706297 -0.0053966777  
C 2.5335569443 0.1006980877 -0.0070853416  
O 3.0833237669 1.3254790978 -0.0118640813  
O -1.6947978391 -2.278961954 0.0065139148  
O 3.2130785278 -0.8796199903 -0.0054713316  
H 1.0215767507 -2.0255422439 0.0011176281  
H 0.8473130783 2.2381179839 -0.0097644179  
H -1.1709129042 -3.0858062118 0.0074818279  
H -3.3343046534 -0.9004364135 0.0055314715  
H -2.6961516383 2.1114064426 -0.0034242619  
H 4.0392099277 1.1828415072 -0.013467332

y- 0.008

C -0.9468460249 -1.1569285654 0.001995133  
C -1.678156587 0.0082337767 0.000229308  
C -1.0333700818 1.2281020316 -0.0041024764  
C 0.3430182653 1.2702261549 -0.0066268856  
C 1.0580344098 0.0958418037 -0.0048547094  
C 0.4187305695 -1.127687498 -0.0005475259  
O -3.0277347809 0.0039347394 0.0026986238  
O -1.730706982 2.3643323397 -0.0058092487  
C 2.5332484448 0.0898215071 -0.0074004982  
O 3.0611520234 1.3015264317 -0.0108382637  
O -1.6804545981 -2.3133392954 0.006413912

O 3.202302766 -0.908634052 -0.0065007837  
H 1.0107855286 -2.0330125624 0.0007864383  
H 0.8369173413 2.2301134352 -0.0098799324  
H -1.0876375789 -3.0664336684 0.0086109478  
H -3.3525018356 -0.9017940085 0.0064218219  
H -2.6802396209 2.1961328607 -0.0031479788  
H 4.0250197416 1.2307895694 -0.012153882

y+ 0.008

C -0.9393717053 -1.1610594893 0.0023538493  
C -1.6631937032 0.0134693601 0.0006024994  
C -1.0231891592 1.2305432099 -0.0036937518  
C 0.3469444775 1.2847231718 -0.0062817507  
C 1.0621177322 0.1061986884 -0.0044489734  
C 0.4294939532 -1.1207247362 -0.0001361165  
O -3.0110445009 0.0121986511 0.0029485196  
O -1.7690065038 2.362089712 -0.005338862  
C 2.5337125049 0.1021611296 -0.0070821917  
O 3.0865189263 1.3289845798 -0.0119825948  
O -1.6965905698 -2.2747229266 0.0065165399  
O 3.2148522704 -0.8755450984 -0.0052964537  
H 1.0228814765 -2.02508516 0.0011276431  
H 0.84886393 2.2392868838 -0.0097712467  
H -1.182401152 -3.0886308274 0.0073721102  
H -3.3321461261 -0.9002549612 0.0054539685  
H -2.6979382649 2.1005565473 -0.0034533062  
H 4.0410574141 1.1770362655 -0.0135958823

z- 0.010

C -0.930908127 -1.1675574132 -0.0831303471  
C -1.6657370725 -0.0030506931 -0.0930591191  
C -1.0294380152 1.2203377146 -0.102039088  
C 0.3419399082 1.2754088489 -0.0911848528  
C 1.0653943822 0.1029750387 -0.1082602657  
C 0.4368866107 -1.1243991985 -0.1144277316  
O -3.0136471474 -0.0147611944 -0.0691063727  
O -1.7586738099 2.3507535842 -0.1032646835  
C 2.5397297155 0.1118582573 -0.0974487734  
O 3.058121846 1.2784741477 0.273907753  
O -1.6629927649 -2.3169680169 -0.055058351  
O 3.2242661835 -0.8256502774 -0.3933388045  
H 1.0295736547 -2.0283850885 -0.113044588  
H 0.8338092341 2.2343295583 -0.0357265536  
H -1.2209174644 -2.9986059225 0.459602004

H -3.319539375 -0.8974288393 0.1762128997  
H -2.6703855815 2.1465188526 0.1386750796  
H 4.014078823 1.1673756416 0.3659857946

z+ 0.010

C -0.9306028172 -1.1670676409 0.0878671242  
C -1.6654351497 -0.0025659418 0.0942186996  
C -1.0291356637 1.2208573502 0.0943792941  
C 0.3422157322 1.27584346 0.0783029344  
C 1.0657407668 0.1035328772 0.099026756  
C 0.4372765669 -1.1237787895 0.1140152452  
O -3.0134877157 -0.0145157043 0.0751321681  
O -1.7582917011 2.351280081 0.0922101217  
C 2.5400910448 0.1122647414 0.0827769267  
O 3.057043505 1.2767977468 -0.296635418  
O -1.662674293 -2.3168040779 0.0684141086  
O 3.2254881208 -0.8238413458 0.3811381208  
H 1.0299996815 -2.0277415113 0.1153212007  
H 0.8338743146 2.234457197 0.0159581019  
H -1.2224387491 -3.0006300419 -0.4449003665  
H -3.3200007726 -0.8984434785 -0.1647325718  
H -2.6708259736 2.1459967128 -0.1456586972  
H 4.0127241031 1.1655833655 -0.3915397486

z- 0.002

C -0.9420441638 -1.1588823774 -0.0207153872  
C -1.6698780743 0.010299877 -0.0232755423  
C -1.0281146354 1.2287677216 -0.0257280833  
C 0.3445546775 1.2777688555 -0.0240608451  
C 1.0603353527 0.1017269017 -0.0262518903  
C 0.4248903995 -1.1233242989 -0.0269426218  
O -3.0185421972 0.0068228725 -0.0169834359  
O -1.7512702494 2.3618986506 -0.0247678382  
C 2.5335781521 0.0967433161 -0.0238252793  
O 3.0736720693 1.3135917642 0.0446704229  
O -1.6875615346 -2.2940099181 -0.0147054177  
O 3.2087488971 -0.8896567482 -0.0777663414  
H 1.0179219457 -2.0276018152 -0.0268132843  
H 0.8421504042 2.2347998631 -0.0130323254  
H -1.1403304395 -3.0731522381 0.1100766518  
H -3.3401744789 -0.9000964851 0.0516061468  
H -2.6895583917 2.1450952328 0.028879316  
H 4.0331832666 1.2004338258 0.0649297548  
z+ 0.002

C -0.9419672785 -1.1587484294 0.0252620956  
C -1.6698019551 0.0104293921 0.0242456037  
C -1.0280452199 1.2288869707 0.017964336  
C 0.3446136014 1.2778593366 0.0111294236  
C 1.0604054503 0.1018412859 0.0169685044  
C 0.424976548 -1.1231801156 0.0264069571  
O -3.0184937135 0.006911822 0.0228028669  
O -1.7511893925 2.3620080345 0.0136043622  
C 2.5336430339 0.0968153713 0.0092746315  
O 3.0734603622 1.3132643294 -0.0675493078  
O -1.687475156 -2.2939212034 0.027929592  
O 3.2089678353 -0.8893270502 0.0659648852  
H 1.0180184726 -2.0274479167 0.0289400817  
H 0.8421620166 2.2348134387 -0.006731705  
H -1.1406302361 -3.0736592453 -0.0947905719  
H -3.3403202928 -0.9003604278 -0.0398938267  
H -2.6896677685 2.1449762081 -0.0355668902  
H 4.0329046925 1.2000631992 -0.0906670383

z- 0.004

C -0.9403778105 -1.1602352031 -0.0412640407  
C -1.6691288391 0.0082377464 -0.0450214767  
C -1.028161241 1.2274353816 -0.046401006  
C 0.3442535959 1.2773137995 -0.0409016807  
C 1.0610944647 0.101713413 -0.0472329824  
C 0.4266951581 -1.1236457628 -0.0519393708  
O -3.0177986929 0.003377846 -0.0350017119  
O -1.7523483262 2.3601485324 -0.0437445269  
C 2.5343571342 0.0986470146 -0.0410979369  
O 3.0714005692 1.3099852562 0.10175703  
O -1.6839822724 -2.297788764 -0.0323309244  
O 3.2110867604 -0.8819991331 -0.1530247241  
H 1.0196650953 -2.0278654881 -0.0528449476  
H 0.8410710964 2.2345559621 -0.016348403  
H -1.1533633247 -3.0614198113 0.2082667071  
H -3.3363237682 -0.8985630351 0.092334811  
H -2.6869575559 2.1443779771 0.0586102235  
H 4.0303789565 1.1969492684 0.1414789605

z+ 0.004

C -0.9402319005 -1.1599794744 0.045822203  
C -1.6689842839 0.0084864236 0.0460167287  
C -1.0280286767 1.2276684322 0.038668889

C 0.3443668365 1.2774935616 0.0279912173  
C 1.0612313022 0.1019424338 0.0379584716  
C 0.4268619929 -1.1233635191 0.0514101121  
O -3.017709472 0.003538812 0.0408469494  
O -1.7521922429 2.3603665068 0.0326355696  
C 2.5344876254 0.0987969805 0.0265423578  
O 3.0709746741 1.3093126826 -0.1247003974  
O -1.6838224973 -2.2976290025 0.0455451976  
O 3.2115345501 -0.8813106342 0.1412727574  
H 1.0198525708 -2.0275641831 0.0549767497  
H 0.8410914449 2.2345874987 -0.003392201  
H -1.1539524954 -3.0624062669 -0.1930370573  
H -3.3365830051 -0.89907067 -0.0806874171  
H -2.6871641319 2.1441550086 -0.0653362199  
H 4.0298287088 1.1962004098 -0.1672399107

z- 0.006

C -0.9378623008 -1.1622307712 -0.0579876892  
C -1.6681073767 0.0051985138 -0.0634256925  
C -1.0283443632 1.2255366928 -0.0657297046  
C 0.3437532862 1.2767062349 -0.0575480923  
C 1.0622835881 0.1018582526 -0.0678135452  
C 0.429443709 -1.1239835114 -0.0746284675  
O -3.0166192956 -0.0015978048 -0.0491032145  
O -1.753952663 2.3575500822 -0.062853167  
C 2.5358051663 0.1018884014 -0.0596532324  
O 3.0679746665 1.3029607998 0.1601167936  
O -1.6784933485 -2.3031699574 -0.0441764885  
O 3.2146697829 -0.8685941759 -0.2331100924  
H 1.0222871442 -2.0281472765 -0.0757772689  
H 0.8393369378 2.234311372 -0.0212121678  
H -1.1725431764 -3.0441646432 0.2994623385  
H -3.3312442386 -0.8973049256 0.1254266262  
H -2.6830128554 2.1438887355 0.0854917044  
H 4.0261863374 1.1905189809 0.2178153599

z+ 0.006

C -0.9376546852 -1.1618787678 0.0626102869  
C -1.6679021216 0.0055413805 0.0644773165  
C -1.0281522074 1.2258723797 0.0580191524  
C 0.3439203358 1.2769731727 0.0446438175  
C 1.06248991 0.1022000772 0.0585583305  
C 0.4296903034 -1.1235755916 0.07415028  
O -3.0164981934 -0.0013921637 0.0550123874

O -1.7537241909 2.357869319 0.0517501272  
C 2.5360102485 0.1021248994 0.0450813645  
O 3.0673294362 1.3019340881 -0.183067211  
O -1.6782640849 -2.3029863908 0.057451977  
O 3.2153707384 -0.867515816 0.2213230374  
H 1.0225622155 -2.0277143154 0.0779824601  
H 0.8393685166 2.2343686585 0.0014534852  
H -1.1734551349 -3.0455383964 -0.2844826473  
H -3.3315856557 -0.8980109823 -0.1138455457  
H -2.683309164 2.1435586607 -0.0922552566  
H 4.0253647337 1.1893947882 -0.243569362

z- 0.008

C -0.9347170873 -1.164685443 -0.0716597137  
C -1.6670037526 0.0014143896 -0.0790993324  
C -1.0288076944 1.2231934503 -0.0842506778  
C 0.3429464219 1.2760961283 -0.0744777582  
C 1.0637250148 0.1023074408 -0.0882288682  
C 0.4328545094 -1.12422016 -0.0954530836  
O -3.0152124107 -0.0076728754 -0.0599009716  
O -1.7560977636 2.3543606378 -0.0827676183  
C 2.5376854607 0.1063406569 -0.0786193391  
O 3.0636526052 1.2923520149 0.2178480713  
O -1.6715424749 -2.3095563718 -0.0511346729  
O 3.2191248396 -0.8497001624 -0.3139494624  
H 1.0255974522 -2.0283039712 -0.0957717208  
H 0.8368714067 2.2342612002 -0.0279878587  
H -1.1953609881 -3.0229439894 0.3827704829  
H -3.3254792442 -0.8969493313 0.1527176915  
H -2.6775160761 2.1443087775 0.1120641134  
H 4.0208407814 1.1806226084 0.2931947186

z+ 0.008

C -0.9344593409 -1.1642554756 0.0763334227  
C -1.6667480306 0.0018366353 0.0801951946  
C -1.0285589623 1.2236263568 0.0765608901  
C 0.3431687107 1.2764502601 0.0615877036  
C 1.0640004254 0.1027598205 0.0789889743  
C 0.4331736148 -1.123699076 0.0950086812  
O -3.0150710723 -0.0074360274 0.0658572898  
O -1.7557930483 2.3547842938 0.0716789982  
C 2.5379674661 0.106661962 0.0640027874  
O 3.0627885457 1.2909906215 -0.2406984049  
O -1.6712672973 -2.3093692261 0.0644380551

O 3.2200840444 -0.8482523689 0.3019673664  
H 1.0259508591 -2.0277563545 0.0980118331  
H 0.8369203279 2.234353354 0.008230349  
H -1.1965560561 -3.0246805716 -0.3678898379  
H -3.3258919364 -0.8978101062 -0.1412122191  
H -2.6778944893 2.143874292 -0.1188958466  
H 4.0197472394 1.1791466104 -0.3188712369

### Gallic Acid (Radical)

x- 0.010

C -0.9375246767 -1.1953215858 0.0031379567  
C -1.7291355106 0.0065417479 0.0013884811  
C -1.0077569867 1.2625598589 -0.0034246076  
C 0.351826471 1.3219908564 -0.0063917847  
C 1.0510429742 0.1274058153 -0.0046833925  
C 0.4129691803 -1.1146252412 0.0000471043  
O -2.9647093355 0.0383147809 0.0038073082  
O -1.7894212152 2.3334596098 -0.0047138875  
C 2.5413275205 0.0865030526 -0.0078693846  
O 3.0939318085 1.2852467698 -0.0117440755  
O -1.6213135738 -2.3459029911 0.007832762  
O 3.1443221263 -0.9395921557 -0.0071079889  
H 1.0404594363 -1.9972895421 0.0011533034  
H 0.8730992761 2.2670285689 -0.009953619  
H -1.007713898 -3.0882401068 0.009123968  
H -2.6973105667 1.9780911583 -0.0017689072  
H 4.0609989701 1.1969524039 -0.0135382363

x+ 0.010

C -0.9313042359 -1.2225942532 0.0032506285  
C -1.7287188595 -0.005680612 0.0017427196  
C -1.0046971955 1.2578340038 -0.0033646504  
C 0.3587790794 1.2992993515 -0.0063530692  
C 1.0614230281 0.1025582618 -0.0044846183  
C 0.4243557129 -1.1462055773 0.0002418842  
O -2.9416760509 0.0140494038 0.0043525821  
O -1.7459098951 2.336027335 -0.0047692244  
C 2.5220730591 0.1090654191 -0.0074794187  
O 3.0669327835 1.3362622397 -0.0125364288  
O -1.6408510575 -2.3358333155 0.007672809  
O 3.2351665716 -0.8605878117 -0.0058928891  
H 1.0325390323 -2.0399096794 0.001363048  
H 0.8676427842 2.2494907964 -0.0101226199  
H -1.0957995234 -3.1280303489 0.0081403904  
H -2.6850687472 2.0616276326 -0.0021301477



H 4.020205514 1.1957501544 -0.0143359955

x- 0.002

C -0.9359505577 -1.2053004404 0.0031713275  
C -1.7280854976 0.0021305776 0.0015232805  
C -1.006170687 1.2596225748 -0.0033947997  
C 0.3553222822 1.3114470414 -0.0063940788  
C 1.0533207794 0.1162457591 -0.0046289482  
C 0.4173239359 -1.127013187 0.0000955225  
O -2.9545519294 0.0300192994 0.0040037061  
O -1.77008206 2.3346291565 -0.0047108419  
C 2.5329011093 0.0950140743 -0.0077226747  
O 3.080283256 1.3053734219 -0.0120988293  
O -1.6286275244 -2.3419954662 0.0077583093  
O 3.1803655676 -0.9083514315 -0.0064998359  
H 1.0357067264 -2.0147404033 0.0012173023  
H 0.871741234 2.258250018 -0.0100364524  
H -1.0393191291 -3.1028084496 0.00873184  
H -2.6910100309 2.0117201999 -0.0018729034  
H 4.0419245255 1.1988802551 -0.013846924

x+ 0.002

C -0.9348108878 -1.2106379909 0.0031927976  
C -1.7279917933 -0.0003130091 0.0015889409  
C -1.0056421297 1.2585928263 -0.003380614  
C 0.3566739528 1.3068823322 -0.0063798694  
C 1.0553150509 0.111284706 -0.0045833957  
C 0.4195932903 -1.1332450642 0.0001369622  
O -2.950053967 0.025213048 0.0041067543  
O -1.7614432243 2.3351206667 -0.0047210078  
C 2.5292007066 0.0994781294 -0.0076365777  
O 3.0749813013 1.3153901927 -0.0122626561  
O -1.6325135106 -2.3400080875 0.007724082  
O 3.198472987 -0.8925997392 -0.0062608593  
H 1.0341185368 -2.0231819007 0.0012630011  
H 0.870565849 2.2547428253 -0.0100599477  
H -1.0566816276 -3.1106831704 0.0085367915  
H -2.6886250335 2.028436186 -0.0019500832  
H 4.0339324988 1.1986510494 -0.0140193188

x- 0.004

C -0.9364160832 -1.2027421487 0.0031619226  
C -1.7282477685 0.0032930995 0.0014900863

C -1.0064909204 1.2602667513 -0.0034020674  
C 0.3545542257 1.3139077375 -0.0063965952  
C 1.0525489855 0.1188783786 -0.0046457894  
C 0.4162139693 -1.1239200248 0.0000800227  
O -2.9569283501 0.0322460035 0.0039522205  
O -1.7746516679 2.3343634042 -0.0047090373  
C 2.5348655529 0.0928415715 -0.0077598411  
O 3.0833051814 1.3003743417 -0.0120142077  
O -1.6267476822 -2.3429743284 0.0077755752  
O 3.1713469813 -0.9161879805 -0.0066361915  
H 1.03669856 -2.0104625527 0.0011989718  
H 0.8722205511 2.2602210488 -0.0100191835  
H -1.0310824871 -3.0990398376 0.0088286339  
H -2.6923865525 2.0033405342 -0.0018410676  
H 4.0462895048 1.1987170017 -0.0137684525

x+ 0.004

C -0.9341059016 -1.2134499986 0.0032051761  
C -1.7280649568 -0.0015955336 0.0016232351  
C -1.0054126339 1.2582275296 -0.0033742251  
C 0.3572661527 1.3047833342 -0.0063700735  
C 1.056560469 0.108953628 -0.0045562476  
C 0.4207570342 -1.1364066689 0.0001623291  
O -2.9479034527 0.0226075822 0.0041600234  
O -1.757351117 2.3353558809 -0.0047295023  
C 2.5274168565 0.1017897585 -0.007589785  
O 3.0726791983 1.3204671438 -0.012341848  
O -1.6345250317 -2.3389917138 0.0077076093  
O 3.2075819842 -0.8846546669 -0.0061551701  
H 1.033521589 -2.0273702443 0.0012896064  
H 0.8698853746 2.2532066616 -0.0100694653  
H -1.0658840135 -3.1148182095 0.0084368829  
H -2.6875935205 2.0367814905 -0.0019936365  
H 4.0302639692 1.1982370263 -0.0141099089

x- 0.006

C -0.9368288814 -1.2002337446 0.0031532904  
C -1.7284781947 0.0044163842 0.0014562688  
C -1.0068579701 1.260978633 -0.0034095358  
C 0.3537187647 1.3164864643 -0.0063965948  
C 1.0519148888 0.1216151658 -0.0046598839  
C 0.4151174826 -1.1208284715 0.0000671764  
O -2.95940598 0.0343696143 0.0039017642  
O -1.7793969894 2.3340806014 -0.0047093436

C 2.5369211651 0.0906995521 -0.0077956286  
O 3.0865828076 1.2953575605 -0.0119256561  
O -1.6249044437 -2.3439502236 0.007793795  
O 3.1623369732 -0.924008478 -0.0067857816  
H 1.0378210795 -2.0061318453 0.0011827452  
H 0.8726149806 2.2623395763 -0.0099989438  
H -1.0230858999 -3.095361258 0.0089267979  
H -2.6938942337 1.9949396362 -0.001813822  
H 4.0509164508 1.1983538329 -0.0136916478

x+ 0.006

C -0.9332938976 -1.2163709167 0.0032190675  
C -1.7282115463 -0.0029180901 0.0016600906  
C -1.0051876926 1.2579713237 -0.0033692628  
C 0.3578095814 1.3028154028 -0.006361601  
C 1.0579850721 0.1067226335 -0.0045299695  
C 0.4219393337 -1.1396120954 0.0001887558  
O -2.9457988806 0.019868866 0.004217472  
O -1.753398607 2.3355879027 -0.0047405418  
C 2.5256432692 0.1041592446 -0.0075473445  
O 3.0705833288 1.3256243737 -0.0124143355  
O -1.6365835935 -2.337959053 0.0076937476  
O 3.2167300145 -0.8766618364 -0.0060596433  
H 1.0330566186 -2.0315482477 0.0013159007  
H 0.8691590121 2.2518185704 -0.0100820194  
H -1.0754566884 -3.1190876099 0.0083373822  
H -2.6866558682 2.0451044352 -0.0020387533  
H 4.0267725438 1.1976080967 -0.0141939454

x- 0.008

C -0.9371963908 -1.1977630179 0.0031453442  
C -1.7287738445 0.0054996766 0.00142236  
C -1.0072777069 1.2617458824 -0.0034170741  
C 0.3528113499 1.3191812979 -0.0063948676  
C 1.0514136629 0.124457232 -0.004672248  
C 0.4140351147 -1.117731976 0.0000563049  
O -2.961995724 0.0363929202 0.0038533706  
O -1.7843194428 2.3337795099 -0.0047111004  
C 2.5390727697 0.0885867345 -0.0078317496  
O 3.0901219092 1.2903168392 -0.011835379  
O -1.6230940475 -2.3449259487 0.0078128303  
O 3.1533296779 -0.9318106621 -0.0069437253  
H 1.0390741126 -2.0017423718 0.0011676063  
H 0.8729124675 2.2646076595 -0.0099768842

H -1.0153022558 -3.0917631064 0.0090253563  
H -2.6955347382 1.9865210404 -0.0017900037  
H 4.0558150862 1.1977712904 -0.0136151405

x+ 0.008

C -0.9323643057 -1.2194124812 0.0032342572  
C -1.7284283558 -0.0042795806 0.001700186  
C -1.0049529435 1.2578348048 -0.0033660936  
C 0.3583113776 1.3009854918 -0.0063564996  
C 1.0596007534 0.1045909672 -0.0045067382  
C 0.4231388127 -1.14287345 0.0002149835  
O -2.9437271567 0.0170119334 0.0042819126  
O -1.7495837634 2.335814247 -0.004753575  
C 2.5238652544 0.1065840531 -0.007511813  
O 3.0686715914 1.3308816037 -0.0124798234  
O -1.6386913603 -2.3369081592 0.0076824156  
O 3.2259205781 -0.8686355154 -0.005970347  
H 1.0327269939 -2.0357245609 0.0013400996  
H 0.8684052418 2.2505798149 -0.0101005916  
H -1.0854162077 -3.1234895866 0.008238193  
H -2.6858112828 2.0533889089 -0.0020835779  
H 4.0234267724 1.1967745089 -0.0142679882

Zero Field

C -0.935420728 -1.2079259816 0.0031815602  
C -1.7279982316 0.0009288345 0.0015559347  
C -1.0058907439 1.2590604727 -0.0033875545  
C 0.35602737 1.3091050018 -0.0063882655  
C 1.0542388876 0.1137152289 -0.0046080576  
C 0.4184493634 -1.1301175347 0.0001144897  
O -2.9522651021 0.0276801007 0.0040550371  
O -1.7656828123 2.3348801648 -0.0047147385  
C 2.5310193695 0.0972226265 -0.0076817137  
O 3.0775112761 1.3103694229 -0.0121815562  
O -1.6305481775 -2.3410085303 0.007741139  
O 3.1894031945 -0.9004940515 -0.0063750481  
H 1.0348466846 -2.0189756722 0.001238617  
H 0.8711870871 2.2564243794 -0.0100496579  
H -1.0478367048 -3.1066833091 0.0086349554  
H -2.6897596155 2.020082578 -0.0019094648  
H 4.0378108826 1.1988592691 -0.0139306763

y- 0.010

C -0.9376047882 -1.2063536515 0.003086067  
C -1.741501189 -0.0058528947 0.0013496159  
C -1.0189631217 1.2529117274 -0.0033782533  
C 0.3580719881 1.3015860927 -0.006364463  
C 1.0525250735 0.120036718 -0.004721963  
C 0.4056882546 -1.1299060982 0.0000261835  
O -2.965854309 -0.0022890486 0.0037333805  
O -1.7416937063 2.3376702877 -0.0047622677  
C 2.5304942627 0.092665716 -0.0079095738  
O 3.0731507992 1.2920411035 -0.0116812173  
O -1.620212971 -2.3684081911 0.0078395345  
O 3.1731287392 -0.9237769818 -0.0072502851  
H 1.0243859447 -2.017823086 0.0011874806  
H 0.862805628 2.2561750841 -0.0098681412  
H -0.9915280212 -3.0933614178 0.0094617681  
H -2.6854079391 2.0964076069 -0.0019829874  
H 4.0376073555 1.2214000334 -0.0134698784

y+ 0.010

C -0.9367769233 -1.2100095258 0.0031149555  
C -1.7193334762 0.0067510187 0.0015278281  
C -0.995223427 1.264294012 -0.0033484377  
C 0.3532354108 1.3134934912 -0.0063307457  
C 1.0573561055 0.1035126471 -0.0045011805  
C 0.4319996207 -1.1304306048 0.0001105807  
O -2.9439187832 0.0567495244 0.0044279556  
O -1.7860938124 2.335242549 -0.0045439869  
C 2.532440481 0.0995511984 -0.0073730938  
O 3.0805496216 1.3296018022 -0.0128460495  
O -1.6375210225 -2.3190636588 0.0075195972  
O 3.209721251 -0.8776833477 -0.0052128202  
H 1.0437246031 -2.0231957545 0.0012677228  
H 0.8783200649 2.2548144914 -0.0100757542  
H -1.0985496863 -3.1212561387 0.0080704683  
H -2.690909263 1.9581490175 -0.0018947897  
H 4.0360712354 1.1826022784 -0.0146172501

y- 0.002

C -0.9356172312 -1.2075752008 0.0031730117  
C -1.7303080176 -0.0003127495 0.0015224013  
C -1.0082583357 1.257934939 -0.003388978  
C 0.3565447051 1.3078651532 -0.0063863062  
C 1.0538028103 0.1153092513 -0.004629867

C 0.4158237636 -1.1300413091 0.0001029947  
O -2.9545424829 0.0219103166 0.0040034591  
O -1.7612337553 2.335146082 -0.0047342445  
C 2.5308635617 0.0965026775 -0.0077303308  
O 3.0767417475 1.306672262 -0.0120652106  
O -1.6287635395 -2.3460356726 0.0077722176  
O 3.1858483034 -0.9050726361 -0.0065810309  
H 1.0328126665 -2.018518489 0.0012320179  
H 0.8697700776 2.2564768474 -0.0100186088  
H -1.0370785994 -3.1039801876 0.008779113  
H -2.68924686 2.0339608368 -0.0019327531  
H 4.037933186 1.2028808787 -0.0138228854

y+ 0.002

C -0.9353441555 -1.208342613 0.0031871372  
C -1.7259242411 0.0021336926 0.0015855657  
C -1.0036339644 1.2601952589 -0.0033847165  
C 0.3554917203 1.3102216068 -0.0063838757  
C 1.0547367814 0.1119955617 -0.0045788596  
C 0.42110466 -1.1301991447 0.0001285801  
O -2.9502020224 0.0333910536 0.0040946436  
O -1.7699998119 2.3347287082 -0.0046946168  
C 2.531271785 0.0978603295 -0.007619688  
O 3.0782641659 1.3140674059 -0.012300857  
O -1.6322171882 -2.3361756382 0.0077042915  
O 3.1931090977 -0.8959749248 -0.0061729817  
H 1.036863252 -2.0195291024 0.0012498004  
H 0.8725563778 2.2563138959 -0.0100711793  
H -1.0585022259 -3.1094906906 0.0084985296  
H -2.6901422431 2.0067429113 -0.0018875656  
H 4.0376600125 1.1951846893 -0.0140592082

y- 0.004

C -0.9359314521 -1.2072519974 0.0031592998  
C -1.73284043 -0.001611002 0.0014836261  
C -1.0107656576 1.2567537468 -0.0033882498  
C 0.3570311262 1.3064807323 -0.0063791454  
C 1.0534235759 0.1167767765 -0.0046472713  
C 0.4132131989 -1.1299783274 0.0000912735  
O -2.9570564537 0.0160439156 0.0039418784  
O -1.7566041714 2.3355394738 -0.0047502617  
C 2.5307634777 0.0957060154 -0.0077691822  
O 3.0759597212 1.3029745632 -0.0119562504  
O -1.6268521362 -2.3512992647 0.0077959217

O 3.1824320268 -0.9096984368 -0.0067799643  
H 1.0307471411 -2.0181587189 0.001226971  
H 0.8682178692 2.2564841885 -0.0099791722  
H -1.0260939562 -3.1013262535 0.0089340346  
H -2.6885712294 2.0485143228 -0.0019555521  
H 4.0380193498 1.2071732658 -0.0137329555

y+ 0.004

C -0.9354261734 -1.2088167783 0.0031897576  
C -1.7240506018 0.0033305742 0.0016128356  
C -1.0014354133 1.2613705432 -0.0033795247  
C 0.3549298312 1.3112486061 -0.006372454  
C 1.0552872652 0.1101098195 -0.0045406993  
C 0.4238120069 -1.130264838 0.0001464978  
O -2.9483283777 0.0390910332 0.0041197589  
O -1.7742289446 2.3347050802 -0.004672079  
C 2.531589235 0.0983935234 -0.0075410472  
O 3.0789638116 1.3178177851 -0.012434569  
O -1.6337589866 -2.3315044007 0.0076591199  
O 3.1970052615 -0.8914707259 -0.0059602867  
H 1.0388298845 -2.020195432 0.0012677108  
H 0.873975797 2.2561165478 -0.0100828079  
H -1.0691026226 -3.1124043632 0.0083618849  
H -2.6904121948 1.9937795688 -0.0018633152  
H 4.037442222 1.1918164566 -0.0142157825

y- 0.006

C -0.9363700633 -1.2069364599 0.0031397631  
C -1.735561371 -0.0029658896 0.0014409299  
C -1.0133964985 1.2555081304 -0.0033857266  
C 0.3574603575 1.3049626647 -0.006371363  
C 1.0530898307 0.118074621 -0.0046662116  
C 0.4106392477 -1.1299305973 0.0000756656  
O -2.9597927049 0.0100697929 0.0038745641  
O -1.7517963177 2.3360813696 -0.0047602147  
C 2.5306757981 0.0948110229 -0.0078078528  
O 3.0751225793 1.2992979397 -0.0118582315  
O -1.6247956048 -2.3567934804 0.0078132044  
O 3.179168154 -0.9143564636 -0.0069571202  
H 1.0286456329 -2.017914228 0.0012192456  
H 0.8665278461 2.2564398685 -0.0099381311  
H -1.0148279545 -3.098677457 0.0090990873  
H -2.6877150929 2.0637662332 -0.0019723433  
H 4.0380181614 1.2116859329 -0.0136502652

y+ 0.006

C -0.9356929083 -1.2093115806 0.0031883886  
C -1.7223473077 0.0045242451 0.0016381239  
C -0.9992846996 1.2625334359 -0.0033714031  
C 0.3543601861 1.3121778055 -0.0063550896  
C 1.0558896815 0.1080630957 -0.0044955494  
C 0.426548892 -1.1303116329 0.0001666567  
O -2.9466553178 0.0448157419 0.0041314228  
O -1.7783376728 2.3348172342 -0.00464542  
C 2.5319197702 0.0988328229 -0.0074475483  
O 3.0795929898 1.3216706141 -0.012586869  
O -1.6351744635 -2.3270264319 0.0076042342  
O 3.2010960316 -0.8869310441 -0.0057284299  
H 1.0406911331 -2.0209895256 0.001291094  
H 0.8754485997 2.2558251107 -0.0100865417  
H -1.0795453741 -3.115399308 0.0082244889  
H -2.6905480969 1.9811624183 -0.0018337657  
H 4.037130557 1.1886699988 -0.0143987924

y- 0.008

C -0.9369299093 -1.2066330925 0.0031152406  
C -1.7384501747 -0.0043778031 0.0013962189  
C -1.0161312926 1.2542198919 -0.0033824449  
C 0.357812268 1.3033276463 -0.0063667016  
C 1.0527925265 0.1191674586 -0.0046915063  
C 0.4081267794 -1.1299038932 0.0000536464  
O -2.962730062 0.0039695327 0.0038054017  
O -1.7468240344 2.336788496 -0.0047642924  
C 2.5305853685 0.0937998164 -0.0078552857  
O 3.0741917841 1.2956542246 -0.0117656827  
O -1.6225838698 -2.3624992153 0.0078278033  
O 3.1760665044 -0.9190472394 -0.0071141984  
H 1.0265208018 -2.0177997526 0.0012057223  
H 0.8647204393 2.256337916 -0.0099014525  
H -1.0032967586 -3.0960217058 0.0092757461  
H -2.6866656477 2.0797204891 -0.001981444  
H 4.0378872772 1.2164202301 -0.0135617708

y+ 0.008

C -0.9361575046 -1.2095500698 0.0031385294  
C -1.7206889841 0.0056178573 0.0015377841  
C -0.9971847114 1.2633851537 -0.003362086



C 0.353732983 1.31288229 -0.0063488782  
C 1.0566006538 0.1057453005 -0.0045256171  
C 0.4293329815 -1.1303543262 0.0001156117  
O -2.9451424904 0.0508095107 0.0043589523  
O -1.7823349736 2.334985237 -0.0045870406  
C 2.5320776094 0.0992025114 -0.007444872  
O 3.0799766091 1.3255677778 -0.0126883663  
O -1.6363049459 -2.3229977822 0.007580819  
O 3.2053164782 -0.8823162265 -0.0054863217  
H 1.0422018753 -2.022086363 0.0012627907  
H 0.8769052889 2.2552815878 -0.0100788985  
H -1.088778584 -3.1181745459 0.0081734111  
H -2.6909527067 1.9697643986 -0.001900667  
H 4.0364924216 1.1853606889 -0.0144501508

z- 0.010

C -0.9296267286 -1.2116542505 -0.0036238443  
C -1.7249808588 -0.0050285404 -0.0582916355  
C -1.0069849059 1.2552052633 -0.022425327  
C 0.3550366029 1.3083215648 -0.012079387  
C 1.0560716438 0.115055488 -0.0394495926  
C 0.4240336494 -1.1308262979 -0.0273008995  
O -2.9468719804 0.0170554906 -0.1386578385  
O -1.7669040855 2.331510213 -0.0278651406  
C 2.5310544033 0.1101079434 -0.1127583919  
O 3.0795509611 1.2780454506 0.1975576259  
O -1.6212528994 -2.3471033895 0.0454628754  
O 3.1790396896 -0.8412123545 -0.4419937181  
H 1.0395628192 -2.0199852248 -0.0182082152  
H 0.8678550299 2.2563718282 0.0299501947  
H -1.069940678 -3.0822026868 0.3330409588  
H -2.690407309 2.0226540136 0.0328655316  
H 4.0398566465 1.166808489 0.2190718039

z+ 0.010

C -0.9295975584 -1.2115636182 0.0101197504  
C -1.7247773765 -0.0047228081 0.0615203231  
C -1.006970825 1.2552760459 0.0156495957  
C 0.3550669544 1.3083602663 -0.0007736637  
C 1.0561946046 0.1153453347 0.0301634528  
C 0.4240633898 -1.1306177301 0.027554972  
O -2.9463610695 0.0177143221 0.1469808482  
O -1.7667727516 2.3316229652 0.0183867797  
C 2.531539733 0.110621511 0.0972474884

O 3.0787035595 1.2767120593 -0.2217072636  
O -1.621309242 -2.3474892661 -0.0297997883  
O 3.1806014495 -0.8391231624 0.4289339907  
H 1.0396120096 -2.0197867069 0.0207326117  
H 0.8676595371 2.2561877962 -0.0501623765  
H -1.0709707629 -3.0837475182 -0.316223622  
H -2.6905605065 2.0226397783 -0.0367602788  
H 4.0389708549 1.1656937309 -0.2465678199

z- 0.002

C -0.935108496 -1.2080990305 0.0016948324  
C -1.7278675368 0.0006401836 -0.0102442235  
C -1.005853174 1.2589217541 -0.0068752288  
C 0.3560591935 1.3091309965 -0.0071864838  
C 1.05433336 0.1138151978 -0.0113677605  
C 0.4186893481 -1.1301484408 -0.0054653201  
O -2.9520218075 0.027185862 -0.0240499605  
O -1.7657529042 2.334785543 -0.0090298624  
C 2.5309078727 0.0977283976 -0.0283621257  
O 3.0775719019 1.3093146846 0.0279895824  
O -1.6302052945 -2.3412571774 0.0151642772  
O 3.1887837538 -0.8984870005 -0.0911390564  
H 1.0350987446 -2.0189699743 -0.0030834023  
H 0.8711462168 2.2564909159 -0.0015789363  
H -1.0486609265 -3.1057527873 0.072085557  
H -2.6898667807 2.0202406956 0.0047145319  
H 4.0378385288 1.1975831802 0.0320285794

z+ 0.002

C -0.9351009202 -1.2080771871 0.0046862415  
C -1.7278270938 0.0007062553 0.0133613683  
C -1.0058489364 1.2589352913 0.0001012722  
C 0.356066057 1.3091369457 -0.0056217774  
C 1.0543593221 0.1138687955 0.0021064955  
C 0.4186981827 -1.1301089559 0.0056875572  
O -2.9519203478 0.0273362306 0.0322057848  
O -1.7657329293 2.3348037735 -0.0003868933  
C 2.5310023259 0.0978224062 0.012925705  
O 3.077397175 1.3090517388 -0.0523469905  
O -1.6302245095 -2.341322485 0.0003778058  
O 3.1890869868 -0.8980865207 0.0783874171  
H 1.0351131517 -2.0189319211 0.0055757215  
H 0.8711084357 2.2564524711 -0.0185679385  
H -1.0488414534 -3.106059392 -0.0548998364

H -2.6898972686 2.0202278888 -0.0085031166  
H 4.0376538222 1.197367665 -0.0597938164

z- 0.004

C -0.9344375908 -1.2085336379 0.0004646486  
C -1.7275159492 -0.0000664222 -0.0220603154  
C -1.0059868327 1.2584807273 -0.0105576791  
C 0.3559376448 1.309046213 -0.0080927605  
C 1.054534943 0.1139666594 -0.0181719648  
C 0.419341303 -1.1302323919 -0.0109249684  
O -2.9514076767 0.0258938485 -0.0522933403  
O -1.7658979231 2.3343952091 -0.0137951013  
C 2.5308849638 0.0992324476 -0.0495185481  
O 3.0778732729 1.3056119273 0.0701638419  
O -1.6291252917 -2.3419253786 0.0230203198  
O 3.1874395624 -0.8916514204 -0.1789557031  
H 1.0356408411 -2.0190899157 -0.0072675984  
H 0.8707722853 2.2564877565 0.0066810074  
H -1.0511322707 -3.1028733812 0.136518334  
H -2.689952945 2.0205554395 0.0110224207  
H 4.0381236636 1.1938253195 0.079062407

z+ 0.004

C -0.9344048127 -1.2085567835 0.0056123722  
C -1.7275725266 0.0001375077 0.0249791211  
C -1.0060267167 1.258574643 0.0039775933  
C 0.3558691171 1.3090832358 -0.0044193523  
C 1.0545505029 0.1140964861 0.0088587985  
C 0.4193750389 -1.1301769091 0.011006921  
O -2.9512841914 0.0264225276 0.0602068267  
O -1.7659650643 2.3343542829 0.0042120245  
C 2.5311747747 0.099332997 0.0336504343  
O 3.0777251262 1.3049936021 -0.0943100163  
O -1.6293486096 -2.3418725761 -0.0077872067  
O 3.1882032937 -0.8909613424 0.165674218  
H 1.0357061104 -2.0190699697 0.0099249515  
H 0.8705756459 2.2565086499 -0.026521035  
H -1.0516535394 -3.103499827 -0.1184116077  
H -2.6898774281 2.0200343545 -0.0147619429  
H 4.0380452789 1.1937221211 -0.1065971001

z- 0.006

C -0.9333132077 -1.2092642392 -0.0005852  
C -1.7269201852 -0.0012273327 -0.0338982268  
C -1.0062136703 1.2577319744 -0.0144253622  
C 0.3557342235 1.3088783593 -0.009152192  
C 1.0548866746 0.1142058186 -0.0250138725  
C 0.4204496553 -1.130385708 -0.0162459682  
O -2.950350185 0.0238150343 -0.0807722889  
O -1.7661312335 2.3337303925 -0.0188334037  
C 2.5308808998 0.1018147114 -0.0709164155  
O 3.0782816014 1.29902985 0.1136206111  
O -1.627300844 -2.3430794032 0.0311338061  
O 3.1852596462 -0.8796161624 -0.2686672988  
H 1.0365464638 -2.0193270986 -0.0111376531  
H 0.8701302401 2.2564550626 0.0146771131  
H -1.0553063449 -3.0980571264 0.2016030819  
H -2.6900815643 2.0210747735 0.0173131088  
H 4.0385398301 1.187344094 0.1265951607

z+ 0.006

C -0.9333028005 -1.2092076268 0.0070011221  
C -1.7268036566 -0.0010409526 0.037060914  
C -1.0062069162 1.2577770941 0.007644514  
C 0.3557503465 1.3088990699 -0.003674335  
C 1.0549564309 0.114374067 0.0157487713  
C 0.4204637529 -1.1302618961 0.0164767149  
O -2.9500531071 0.0242123213 0.0889873116  
O -1.7660510749 2.3338057409 0.0093879627  
C 2.5311721839 0.1021232147 0.0554685303  
O 3.0777682118 1.2982288062 -0.13789436  
O -1.6273496811 -2.3433042885 -0.015570267  
O 3.1862022707 -0.878355588 0.2558074611  
H 1.0365754067 -2.0192057487 0.0136244961  
H 0.8700157509 2.2563397593 -0.0348453871  
H -1.0558765144 -3.0990078703 -0.1845115647  
H -2.6901672207 2.0210832462 -0.0211412351  
H 4.0379986173 1.1866636513 -0.1542756492

z- 0.008

C -0.9317105714 -1.2102887789 -0.001999454  
C -1.726060587 -0.0028646747 -0.0459856418  
C -1.006528666 1.2566449528 -0.0183374128  
C 0.355442913 1.3086324743 -0.0104128516  
C 1.0553855392 0.1145632965 -0.0320607967

C 0.4220055984 -1.1305802319 -0.0217195671  
O -2.9488170421 0.0209125138 -0.109548567  
O -1.7664541439 2.3327610024 -0.0234413532  
C 2.5309035712 0.1054282799 -0.0919330841  
O 3.0787996012 1.2898837624 0.1557307733  
O -1.6246860295 -2.3447732042 0.0385263842  
O 3.1824003685 -0.8628690022 -0.3558916739  
H 1.0378396689 -2.0196254913 -0.0148066051  
H 0.8691813999 2.2564032333 0.0225305216  
H -1.0614439187 -3.0911919041 0.2669724355  
H -2.6902302649 2.0217548816 0.0245915371  
H 4.0390645632 1.1783318902 0.1730803556

z+ 0.008

C -0.9316936029 -1.2102136203 0.0084506734  
C -1.725902789 -0.0026173538 0.0491750819  
C -1.0065194731 1.256704192 0.0115580007  
C 0.3554644036 1.3086624261 -0.0024218553  
C 1.0554797116 0.1147920226 0.0227889323  
C 0.4220250547 -1.1304129217 0.02196052  
O -2.9484157869 0.0214404066 0.1178092237  
O -1.7663485682 2.3328576113 0.0139774914  
C 2.531291803 0.1058383472 0.0764501568  
O 3.0781198882 1.2888189019 -0.179926416  
O -1.6247430662 -2.3450760815 -0.0229182531  
O 3.1836565908 -0.8611994315 0.3429034652  
H 1.0378773994 -2.0194632079 0.0173088929  
H 0.8690255918 2.2562532172 -0.042714625  
H -1.0622276616 -3.0924485343 -0.2499803747  
H -2.6903478471 2.0217556846 -0.0284585656  
H 4.0383503519 1.1774313414 -0.2006673488

Gallic Acid (Anion)

x- 0.010

C -0.9647452657 -1.1384746789 0.0029842583  
C -1.7424171039 0.0232216194 0.0013995355  
C -1.0105410229 1.2360247706 -0.0033856657  
C 0.3489609301 1.3071490233 -0.0063855838  
C 1.0764193444 0.1233213666 -0.0047392845  
C 0.4050102346 -1.0809655405 -0.0000689657  
O -3.025725337 0.1005283491 0.00336863  
O -1.8229488289 2.3271362997 -0.0045463591  
C 2.5382755926 0.0795011998 -0.0078108215  
O 3.1256105767 1.2821730592 -0.0119272242

O -1.6116858422 -2.3564827733 0.007697723  
O 3.1924652126 -0.9267922069 -0.0070126719  
H 1.0006617659 -1.9874353106 0.0011303538  
H 0.8553616779 2.2614267401 -0.0098925684  
H -0.9313559794 -3.033568436 0.0090849862  
H -2.6997581431 1.8764687075 -0.0011040808  
H 4.0815031883 1.129890811 -0.0134992613

x+ 0.010

C -0.9375111015 -1.187063432 0.0033092162  
C -1.7320878268 0.009494836 0.0018404122  
C -0.9929934461 1.2495671278 -0.0033886301  
C 0.3475101504 1.2981123838 -0.0064816411  
C 1.1075691193 0.1003929368 -0.0046653433  
C 0.4089241675 -1.1277671051 0.0002652783  
O -2.9582232875 0.0512948427 0.0044108185  
O -1.7805057044 2.3402418751 -0.0047888576  
C 2.5031970556 0.1045431908 -0.0075307486  
O 3.093228204 1.3529008134 -0.0123010395  
O -1.6490545041 -2.3453232938 0.0079520363  
O 3.2962486877 -0.8430290223 -0.0062867461  
H 0.9880745728 -2.0442347585 0.0015201365  
H 0.8408137885 2.2589048934 -0.0103939077  
H -1.0560887614 -3.0975876216 0.0076379917  
H -2.6906576999 1.9790533957 -0.0018594269  
H 4.0266475858 1.1236219378 -0.0139465488

x- 0.002

C -0.95653227 -1.1536388975 0.0030392095  
C -1.7375694162 0.0192312336 0.0014410257  
C -1.0021396377 1.2390896198 -0.00332693  
C 0.3509715599 1.3019335807 -0.0062263373  
C 1.0851195009 0.1135554309 -0.0045103142  
C 0.4060337801 -1.0967447795 0.0001106496  
O -2.9976589108 0.0873086644 0.0037307542  
O -1.8042839322 2.3302479163 -0.0046149866  
C 2.5241882435 0.0884234813 -0.0073724169  
O 3.108438209 1.3073403699 -0.012328003  
O -1.6260838897 -2.3522573502 0.0076705231  
O 3.2292658497 -0.8941733255 -0.006727208  
H 0.9935976902 -2.0079864664 0.0013829078  
H 0.8523574361 2.2585353992 -0.0097808181  
H -0.9750367192 -3.0561070201 0.0084991773  
H -2.6924064186 1.9073203952 -0.0016083189

H 4.056829925 1.1310447479 -0.0140859141

x+ 0.002

C -0.9504950109 -1.1636482578 0.0030879294  
C -1.734989376 0.0163382784 0.0014869268  
C -0.9984600906 1.242106243 -0.0033083859  
C 0.3506995564 1.3001480666 -0.0061675871  
C 1.0916879149 0.1089429358 -0.0044022197  
C 0.4071055501 -1.1060299942 0.0002161342  
O -2.9830639262 0.077422596 0.0038680289  
O -1.7963322537 2.3325603672 -0.0046574305  
C 2.5165740031 0.0935391416 -0.0071717409  
O 3.1021144946 1.3214819066 -0.0125057727  
O -1.6334311675 -2.3499497283 0.0076694595  
O 3.2497683651 -0.8771715371 -0.0066273105  
H 0.9912999396 -2.0193330343 0.0015109459  
H 0.8491485421 2.2581822737 -0.0097674921  
H -1.0002877655 -3.0693751511 0.0082135825  
H -2.692143488 1.9290959358 -0.0018111697  
H 4.0458957124 1.1288129582 -0.0143408984

x- 0.004

C -0.9588698302 -1.1494162755 0.0030058698  
C -1.7386405811 0.0203856977 0.0014211083  
C -1.0040630204 1.2380082262 -0.0033469083  
C 0.3508182871 1.303034433 -0.0063256447  
C 1.082616951 0.1158385836 -0.0047059902  
C 0.4058207408 -1.0926194898 -0.0000353396  
O -3.0044720727 0.0916492096 0.0039215162  
O -1.8089211038 2.3289792955 -0.0045879786  
C 2.527830526 0.0860920274 -0.0077123398  
O 3.1123490333 1.3008668508 -0.0121011757  
O -1.622505803 -2.3532212322 0.007745345  
O 3.219872357 -0.9024663464 -0.0067532296  
H 0.9951199889 -2.0028108627 0.0011964331  
H 0.8533798265 2.259048697 -0.0098875018  
H -0.9636884144 -3.05010839 0.0087085232  
H -2.6942685374 1.8985974735 -0.0015937224  
H 4.0627126522 1.1312651024 -0.0136559651

x+ 0.004

C -0.9475290128 -1.1689485366 0.0031630132  
C -1.7341029295 0.0148160847 0.0016313916  
C -0.9968447929 1.2437131224 -0.0033573752  
C 0.3502010958 1.2994588514 -0.0063867997  
C 1.0951183272 0.1068019299 -0.0046544444  
C 0.4073923557 -1.1109613451 0.0001407894  
O -2.9766030409 0.0713403776 0.0041162996  
O -1.7918962934 2.3345175783 -0.0046810529  
C 2.5129893659 0.0961026241 -0.0075802201  
O 3.0990895657 1.32875212 -0.0123017793  
O -1.6371939343 -2.3489981699 0.0078272498  
O 3.2603680428 -0.8687077741 -0.0064409711  
H 0.9901858189 -2.0251402827 0.0013981048  
H 0.8473673144 2.2581808355 -0.0101266208  
H -1.0131269598 -3.0761071013 0.0081178343  
H -2.6908693134 1.9403784451 -0.0017111741  
H 4.0405453907 1.1279242407 -0.0138612451

x- 0.006

C -0.9610798174 -1.1454302175 0.0029705321  
C -1.7398790931 0.0214749417 0.0013678432  
C -1.0060864708 1.2370577067 -0.003343611  
C 0.3504453056 1.3042940354 -0.0062952392  
C 1.0802978723 0.11825435 -0.004696348  
C 0.4055293964 -1.0886258609 -0.0000623924  
O -3.0115618615 0.0952028506 0.003876424  
O -1.8134212762 2.328104953 -0.0045736943  
C 2.5314962766 0.0837872515 -0.0077031784  
O 3.1164082637 1.2945130509 -0.0120529117  
O -1.6189845234 -2.3542465385 0.007725161  
O 3.2105850802 -0.9107688252 -0.0068666067  
H 0.9967446667 -1.9976740652 0.0011660529  
H 0.8542162205 2.2597349638 -0.0098094877  
H -0.9526204674 -3.044263408 0.0088356224  
H -2.6956983981 1.8903060968 -0.00159441  
H 4.068699826 1.131401715 -0.0136507563

x+ 0.006

C -0.9442158605 -1.1747186612 0.0032063501  
C -1.7332167868 0.0131211908 0.00168734  
C -0.9953698666 1.2455732663 -0.0033613174  
C 0.3494964468 1.2989153424 -0.006395184  
C 1.0990432704 0.1046502935 -0.0046295561



C 0.407882846 -1.1162606649 0.0001942405  
O -2.9700541053 0.0649584685 0.0041837831  
O -1.7879756159 2.3363227613 -0.0047134546  
C 2.5094750143 0.098819898 -0.007521679  
O 3.0967187541 1.3364611127 -0.0123413863  
O -1.6410439917 -2.3478468063 0.0078515378  
O 3.2716840688 -0.8601814149 -0.0063940907  
H 0.9893256225 -2.0312859112 0.0014567236  
H 0.8452705036 2.2583628089 -0.0101801428  
H -1.0268805718 -3.0831546724 0.0079566352  
H -2.6906663715 1.9528304343 -0.0017692353  
H 4.0356176435 1.1265555544 -0.0139375643

x- 0.008

C -0.9629770652 -1.1417771962 0.0029409269  
C -1.7410056729 0.0224569532 0.0013381344  
C -1.0081425043 1.236342513 -0.0033551153  
C 0.3499259034 1.3057296719 -0.0063328806  
C 1.0783110196 0.120739334 -0.0047859162  
C 0.405372684 -1.0848043757 -0.0001431499  
O -3.0185440725 0.098342545 0.0039462313  
O -1.8181747205 2.3272349935 -0.0045572811  
C 2.5351025105 0.0815650406 -0.0078639771  
O 3.1207940736 1.2883556034 -0.0119141895  
O -1.6155284698 -2.355178767 0.0077555086  
O 3.2015135979 -0.9190656844 -0.0069512236  
H 0.9985976114 -1.9926575216 0.0010617892  
H 0.8547754749 2.2606616792 -0.0098300667  
H -0.942113416 -3.0386635771 0.0089969914  
H -2.6976993173 1.8827338272 -0.0015838768  
H 4.0748833632 1.1311079611 -0.0134289048

x+ 0.008

C -0.9408291208 -1.1808061381 0.0032548507  
C -1.7325421734 0.0113277814 0.0017544514  
C -0.9940889058 1.2475417126 -0.0033699398  
C 0.3485686533 1.2984660934 -0.0064188608  
C 1.1032272195 0.1025166885 -0.0046221209  
C 0.4083907771 -1.1218836719 0.0002415666  
O -2.9638842545 0.0581945004 0.0042735067  
O -1.7841915054 2.3382720595 -0.0047498665  
C 2.50617515 0.1016384741 -0.0074887118  
O 3.0947869206 1.3445259359 -0.0123533303  
O -1.6449904368 -2.3466450087 0.0078889288

O 3.283656861 -0.8515992871 -0.0063484122  
H 0.9886359077 -2.0376645467 0.0015051469  
H 0.843045911 2.2586103862 -0.0102581322  
H -1.0412141964 -3.0903645322 0.0077919532  
H -2.6906521436 1.9659219545 -0.0018239659  
H 4.0309963366 1.1250705983 -0.0139840638

#### Zero Field

C -0.9536892049 -1.1585197174 0.0030740652  
C -1.7364257423 0.0179287882 0.001503462  
C -1.000213952 1.2402098282 -0.003341031  
C 0.3509227311 1.3007326837 -0.0063102807  
C 1.0884792837 0.1111492264 -0.0046239172  
C 0.4063714387 -1.1014208438 0.0000752855  
O -2.9906540731 0.0824731494 0.0039463984  
O -1.7998261151 2.3318738103 -0.00463294  
C 2.5203549395 0.0910667133 -0.0075582901  
O 3.1049463944 1.3145766238 -0.0122620093  
O -1.6296569424 -2.3513828597 0.0077454992  
O 3.2394520664 -0.885711885 -0.0066067942  
H 0.9920286887 -2.0138713203 0.0013241689  
H 0.8503978317 2.258368479 -0.0099337208  
H -0.9869018815 -3.0625439378 0.0084277197  
H -2.6915679526 1.9181527695 -0.0016580918  
H 4.0510744895 1.1300414921 -0.0138745237

y- 0.010

C -0.9558118407 -1.1551249044 0.0027652216  
C -1.7508527102 0.0117315938 0.0011684206  
C -1.0116568493 1.2378245955 -0.0033667734  
C 0.3422089451 1.293291099 -0.0062391714  
C 1.0849487506 0.105286439 -0.004823662  
C 0.4037408272 -1.1033070138 -0.0002525715  
O -3.0033164748 0.0436077443 0.0037013037  
O -1.7734373043 2.3431133901 -0.0045820287  
C 2.5194140732 0.081016509 -0.0078962384  
O 3.0918940522 1.2917467016 -0.0118396882  
O -1.6148322029 -2.3771920932 0.0076532701  
O 3.228043941 -0.9129356615 -0.0071951222  
H 0.9904325188 -2.0163398111 0.0009691754  
H 0.834937751 2.2551428478 -0.0095687468  
H -0.9268630616 -3.0427466798 0.00982889  
H -2.6896529789 2.0121159191 -0.0017146271  
H 4.0458935634 1.1558923246 -0.0133146517

y+ 0.010

C -0.9536725978 -1.1636950749 0.0032515423  
C -1.7226852191 0.0234264314 0.0017941258  
C -0.9900031453 1.2428798557 -0.0033875994  
C 0.3602263025 1.30647818 -0.0066726327  
C 1.0905319157 0.1143014027 -0.0048569077  
C 0.409020293 -1.1021387284 0.0001008793  
O -2.9792837643 0.1217802596 0.0042500839  
O -1.8229264907 2.3220150015 -0.0045808523  
C 2.5218730596 0.0994381129 -0.0078359527  
O 3.1164756023 1.3392365675 -0.0123201928  
O -1.6438559024 -2.3294148784 0.0079115223  
O 3.2530281908 -0.8581425046 -0.0057985757  
H 0.9930746904 -2.0154043186 0.0013219665  
H 0.8680686876 2.2596482896 -0.010676092  
H -1.0468378216 -3.0824156524 0.0076583463  
H -2.6921194311 1.832172655 -0.0011677702  
H 4.0541766305 1.1129574013 -0.0136988909

y- 0.002

C -0.9539302387 -1.1576213856 0.0030472814  
C -1.7389604307 0.0167499741 0.0014817372  
C -1.0024370254 1.2400042563 -0.0033530477  
C 0.3491621595 1.2996504912 -0.0063259826  
C 1.0876375959 0.1102653533 -0.0046692497  
C 0.4060109488 -1.1014022498 0.000034089  
O -2.9926715359 0.0751260955 0.0038665424  
O -1.7953020246 2.3333730422 -0.0046289037  
C 2.5201270709 0.0889050898 -0.0076445093  
O 3.102533669 1.309474909 -0.0121821251  
O -1.6267457374 -2.3560558937 0.0077521432  
O 3.2368260839 -0.891317654 -0.0066998427  
H 0.9921138505 -2.0137029599 0.0012864943  
H 0.8476382793 2.2578022001 -0.0099179886  
H -0.9751278397 -3.0585982812 0.0086034945  
H -2.6921112309 1.9359036457 -0.0016176928  
H 4.0503274055 1.1345663668 -0.0137394399

y+ 0.002

C -0.953447794 -1.1593807858 0.0031092408  
C -1.7335466041 0.0189217853 0.0015599912  
C -0.9980869924 1.2409135058 -0.003344884

C 0.3527742192 1.3021443839 -0.0063703116  
C 1.0887658012 0.1120296754 -0.0046630802  
C 0.4070700471 -1.1012669948 0.0000786569  
O -2.9880497237 0.090246541 0.004067359  
O -1.8049464314 2.3293816687 -0.0046237571  
C 2.5206673225 0.0929211556 -0.0076046975  
O 3.1075001625 1.3191548023 -0.0122809089  
O -1.6326796567 -2.3463746556 0.0077810847  
O 3.2419531953 -0.880003597 -0.0064556338  
H 0.99257116 -2.0136377772 0.0013218488  
H 0.8541679573 2.2586364137 -0.0100662366  
H -0.9995943845 -3.0666461841 0.0082505471  
H -2.692036276 1.9000870352 -0.0016247957  
H 4.0520089977 1.1259960276 -0.0138414229

y- 0.004

C -0.9542632218 -1.1568671026 0.0030003688  
C -1.7418132645 0.0155662858 0.0014184718  
C -1.0046972315 1.2394736633 -0.0033471763  
C 0.34737712 1.2981994628 -0.0062537151  
C 1.0870447857 0.1091891371 -0.0046074814  
C 0.4054909464 -1.1016897012 0.0000357648  
O -2.9951420683 0.0674759376 0.0037014268  
O -1.7901316279 2.3355799743 -0.0046291048  
C 2.5199289629 0.086924545 -0.0075507789  
O 3.0998772617 1.3047809062 -0.0121857205  
O -1.6237053322 -2.3612310634 0.0076968537  
O 3.2343950585 -0.8969199119 -0.0068531827  
H 0.9918351304 -2.0140556523 0.0013004055  
H 0.8443515714 2.2572616851 -0.0097679655  
H -0.9628163586 -3.0546586617 0.0088000387  
H -2.6919047794 1.9547238902 -0.0016377999  
H 4.0492640473 1.1393696057 -0.0138274049

y+ 0.004

C -0.9533748316 -1.1603762736 0.0031628289  
C -1.7307824897 0.0200137864 0.001633776  
C -0.9960431617 1.2413976965 -0.0033554548  
C 0.3545723826 1.3032876263 -0.0064327149  
C 1.0892665475 0.1127288072 -0.0046657769  
C 0.4075807425 -1.1013647755 0.0001256013  
O -2.9857548323 0.0979898423 0.0040353281  
O -1.809528912 2.3274246148 -0.0046228824  
C 2.5209351879 0.0946275467 -0.007592401

O 3.1096868908 1.3240041951 -0.0123400987  
O -1.6354712624 -2.3420440896 0.0078040128  
O 3.2445729419 -0.8745801377 -0.0063003809  
H 0.9927921735 -2.0138579998 0.0013745482  
H 0.8575363272 2.2589312113 -0.0102041256  
H -1.0112893084 -3.0706251841 0.0080350252  
H -2.6921184833 1.8832256255 -0.0014785115  
H 4.0525110876 1.1223405083 -0.0138857737

y- 0.006

C -0.9547065978 -1.1561648035 0.0029093319  
C -1.7448124474 0.0143497824 0.0013179387  
C -1.0069133452 1.2389779539 -0.0033546395  
C 0.3456607015 1.2967348451 -0.0062779529  
C 1.0863595476 0.10805778 -0.0047613755  
C 0.4048883942 -1.1020372794 -0.0001201715  
O -2.9978521736 0.0594553268 0.0038736328  
O -1.7847713639 2.3380819652 -0.004609064  
C 2.5197084485 0.0850676898 -0.007804108  
O 3.0974669196 1.3003999214 -0.011988572  
O -1.6208485057 -2.3661790039 0.0077184404  
O 3.2321815586 -0.9021784271 -0.0069578191  
H 0.9913409901 -2.0145670222 0.0011129492  
H 0.8411959504 2.2567081709 -0.0097385957  
H -0.9510944304 -3.0506470526 0.0091965999  
H -2.6911481636 1.9727162949 -0.0017368046  
H 4.0484355172 1.1443468582 -0.0134867901

y+ 0.006

C -0.9533715079 -1.1614356221 0.0031955259  
C -1.7280967503 0.0211084854 0.0016838866  
C -0.9940073716 1.2418612517 -0.0033607975  
C 0.3564157784 1.3043717993 -0.006485169  
C 1.0897311228 0.1133389467 -0.0046837994  
C 0.4080779751 -1.1015538236 0.0001451352  
O -2.9835617064 0.1057314172 0.0040671856  
O -1.814049777 2.3255757608 -0.004614345  
C 2.5212392359 0.0963436638 -0.0075995615  
O 3.1119726124 1.3289969794 -0.0123809007  
O -1.6382981918 -2.3377027139 0.0078210014  
O 3.2473259878 -0.8690590241 -0.0061489803  
H 0.9929370866 -2.014239449 0.0013919074  
H 0.8609537201 2.2591943901 -0.0103221789  
H -1.0231902361 -3.0745815852 0.0078771142

H -2.6920959231 1.8662380531 -0.0013854127  
H 4.053108945 1.1189344703 -0.0139076114

y- 0.008

C -0.9552150695 -1.1555851332 0.0028386262  
C -1.7478158012 0.0130698762 0.0012437619  
C -1.009260172 1.2384105437 -0.0033607227  
C 0.343921631 1.2950748666 -0.0062624856  
C 1.0856729786 0.1067413366 -0.0048008857  
C 0.4043205046 -1.1025917544 -0.0001906663  
O -3.0005483616 0.051568998 0.0038058966  
O -1.7792095686 2.3405515724 -0.0045955192  
C 2.5195516499 0.083065412 -0.0078656969  
O 3.09475047 1.2959978406 -0.011906756  
O -1.6178446469 -2.3715941435 0.0076900073  
O 3.2300450111 -0.9075871625 -0.0070742864  
H 0.9909082964 -2.0153366783 0.0010347675  
H 0.8380206722 2.2559885045 -0.0096593463  
H -0.938959982 -3.0466838479 0.0095109831  
H -2.6905041782 1.99214101 -0.0017332635  
H 4.0472575663 1.1498917592 -0.0133814138

y+ 0.008

C -0.9534575764 -1.1625406215 0.0032209264  
C -1.725453134 0.0222183072 0.0017279425  
C -0.9920077159 1.2423288734 -0.0033666715  
C 0.3582846512 1.305409244 -0.0065435208  
C 1.0901584351 0.1138593178 -0.004719577  
C 0.4085597337 -1.101821349 0.0001490317  
O -2.981443168 0.1135519539 0.0041205974  
O -1.8184569881 2.3238141692 -0.0046013861  
C 2.5215616561 0.0979893452 -0.007633846  
O 3.1142255014 1.3340531647 -0.0124011817  
O -1.6410814842 -2.3335109137 0.0078413283  
O 3.2501349606 -0.8635746247 -0.0059964678  
H 0.9930310223 -2.0147634898 0.0013900682  
H 0.8644082887 2.2594343658 -0.010447026  
H -1.0350104005 -3.0785142821 0.007749504  
H -2.6920248302 1.8493815618 -0.0012982367  
H 4.0536620481 1.1158079776 -0.013898485

z- 0.010

C -0.774024778 -1.2737209303 -0.0069480037  
C -1.6049232993 -0.1414706176 -0.0841449103  
C -0.9717300511 1.1137119455 -0.097994882  
C 0.381308388 1.2382104608 -0.0566433653  
C 1.1769730379 0.0920629969 -0.0276789901  
C 0.580680895 -1.168171673 0.0081703656  
O -2.8711526511 -0.2443194682 -0.1188353559  
O -1.8202510587 2.1744285787 -0.1424208885  
C 2.6145652701 0.1725670987 -0.0124405666  
O 3.1084101477 1.4251730522 0.1299076034  
O -1.4317435478 -2.4597465554 0.0561694664  
O 3.3952119437 -0.7453557663 -0.1246568526  
H 1.2009474108 -2.0491465916 0.0923118042  
H 0.8329423238 2.2187459382 -0.0255885439  
H -2.3641393055 -2.1945439411 0.1518657004  
H -2.6955130896 1.757319249 -0.0382667219  
H 4.0575293642 1.3073792234 0.2524871409

z+ 0.010

C -0.7738123327 -1.2737314153 0.0130729482  
C -1.6045162988 -0.1412342426 0.0870299202  
C -0.9715235038 1.114011325 0.0909321711  
C 0.3813815316 1.23841279 0.0436254987  
C 1.1770541808 0.0922435658 0.0182050793  
C 0.5808461155 -1.1682137956 -0.0079972502  
O -2.8706758248 -0.2443435452 0.1273493294  
O -1.819844638 2.1750065735 0.1324763337  
C 2.6146965117 0.1727930551 -0.0028104345  
O 3.1076678373 1.4244627884 -0.1544929164  
O -1.4318244933 -2.4601296865 -0.0406174921  
O 3.3956372171 -0.7445060078 0.112091793  
H 1.2009327297 -2.0495729569 -0.0893201053  
H 0.8327227921 2.218819197 0.0050621794  
H -2.3645247334 -2.1949921116 -0.1338293253  
H -2.6955666449 1.7575526576 0.0341897497  
H 4.0564405538 1.306544809 -0.2796744788

z- 0.002

C -0.9525451708 -1.159222826 -0.0209231496  
C -1.7355908247 0.0167034228 -0.0243877746  
C -0.9999014939 1.2397412637 -0.0067639397  
C 0.3511214752 1.3005566428 0.0013380799  
C 1.0889095509 0.1110160146 -0.0139967549

C 0.4077594815 -1.1015051565 -0.0248879903  
O -2.9896063103 0.0815138279 -0.0358903401  
O -1.8001283302 2.3302530579 0.0060036988  
C 2.5211061494 0.0916226297 -0.0246666908  
O 3.1051083052 1.3147464876 0.0090322204  
O -1.6273906935 -2.3532562078 -0.0186903277  
O 3.2404193415 -0.8839773649 -0.063490423  
H 0.9933910244 -2.0137868289 -0.0311675808  
H 0.8506767992 2.2578326118 0.0232331288  
H -0.9976674352 -3.0565616724 0.1474324671  
H -2.6918604322 1.9164093863 0.0120217425  
H 4.0512895635 1.1310377115 0.0210966338

z+ 0.002

C -0.9524255264 -1.1590960238 0.0269858627  
C -1.735444418 0.0168456104 0.027451914  
C -0.9999036201 1.2397201206 0.0001406458  
C 0.3510921031 1.300474684 -0.014188478  
C 1.0889522366 0.1110407484 0.0042407273  
C 0.4078919874 -1.101390247 0.0248675879  
O -2.9894203636 0.0818173692 0.0440215513  
O -1.8002570493 2.3301399391 -0.0150819385  
C 2.5212188226 0.0916986606 0.0093281507  
O 3.1050244749 1.3145507867 -0.0343106024  
O -1.6272381482 -2.3531355423 0.0341630406  
O 3.2406425722 -0.8836867698 0.0513068456  
H 0.9935653111 -2.0136195738 0.0340023522  
H 0.8505292832 2.2576137068 -0.0435396073  
H -0.9981925251 -3.0572704879 -0.1309806271  
H -2.6921327673 1.9165367779 -0.0148470818  
H 4.0511886269 1.1308832408 -0.0482673428

z- 0.004

C -0.9479595674 -1.1621332121 -0.0492680682  
C -1.7329571056 0.0123887174 -0.0517596064  
C -0.9986299344 1.2369029008 -0.0098832753  
C 0.3517294224 1.2990490389 0.0095001729  
C 1.0917153653 0.1104663867 -0.025457933  
C 0.4127140018 -1.102205283 -0.053989403  
O -2.9865857544 0.077153588 -0.0765762751  
O -1.8000812489 2.3259960346 0.0187776881  
C 2.5241460556 0.0943186663 -0.0426664259  
O 3.105345501 1.3166620556 0.0326938212  
O -1.617958212 -2.3612546778 -0.053858628



O 3.2451399206 -0.8775355023 -0.1231066122  
H 0.9978366721 -2.0142661306 -0.0700191832  
H 0.8497063753 2.2561866157 0.0585798823  
H -1.039354086 -3.0348418067 0.3067584355  
H -2.6913494005 1.9114555579 0.0273421585  
H 4.0516329951 1.1347800506 0.0582262517

z+ 0.004

C -0.9477503233 -1.1618072872 0.0555192491  
C -1.7327599552 0.0126662847 0.054890769  
C -0.998635036 1.2369148826 0.0032057986  
C 0.3516479343 1.2989508413 -0.0222323473  
C 1.0917794713 0.110584398 0.016109649  
C 0.4129500222 -1.1018777316 0.0541624554  
O -2.986317484 0.0775446883 0.0846529099  
O -1.8001661415 2.3258660586 -0.0280347306  
C 2.5243329243 0.0944774708 0.0273177414  
O 3.1051539723 1.3163143226 -0.0572756911  
O -1.6176143073 -2.3609961132 0.069484612  
O 3.2455454352 -0.8770064562 0.1100690137  
H 0.9981588824 -2.0138349944 0.0727331889  
H 0.8493995939 2.255802306 -0.078661561  
H -1.0405137087 -3.0363199891 -0.2902823888  
H -2.6914857556 1.9113902755 -0.0305710233  
H 4.0513654757 1.1344540435 -0.0857946447

z- 0.006

C -0.7728553737 -1.2751385474 -0.0141510618  
C -1.6046653384 -0.1411405525 0.0119507884  
C -0.9731736444 1.1146768852 0.0217618121  
C 0.3800281272 1.2383704667 -0.0028090319  
C 1.1758373592 0.0927456438 -0.0564753831  
C 0.5806477336 -1.1690965667 -0.0549119589  
O -2.8702317887 -0.247287899 0.0378900083  
O -1.8215571901 2.1744191911 0.0651553326  
C 2.6113617873 0.1739104609 -0.1013821379  
O 3.1109935245 1.4290971067 0.003693436  
O -1.4338769233 -2.4607755871 0.0081320388  
O 3.3902697847 -0.7438270392 -0.2278971364  
H 1.2038990512 -2.0518494766 -0.0594987941  
H 0.832828982 2.2181461019 0.0314395833  
H -2.3653530867 -2.1905915309 0.1081364644  
H -2.6961136911 1.7513775554 0.1479506064  
H 4.0670516866 1.3100867876 0.0363084339

z+ 0.006

C -0.7726901284 -1.2750486047 0.0204420339  
C -1.6047326785 -0.1412992413 -0.0082340651  
C -0.9733546169 1.1143968648 -0.0277932352  
C 0.3799729412 1.2382731646 -0.0098867241  
C 1.1760749742 0.0930405505 0.0465224444  
C 0.5809713513 -1.1688005353 0.0546469713  
O -2.8704255138 -0.2477534777 -0.0280295835  
O -1.8218897807 2.1739574364 -0.0733607638  
C 2.6118528426 0.1744941968 0.0848197926  
O 3.1108514209 1.428985791 -0.0296817388  
O -1.4338224017 -2.4608302532 0.0076888061  
O 3.391193674 -0.7425711121 0.2133521634  
H 1.2043054826 -2.0514821 0.0614521287  
H 0.8324877544 2.217896604 -0.0515726383  
H -2.3656658617 -2.1909771432 -0.0896230651  
H -2.6968572562 1.7506620221 -0.1499326066  
H 4.0668187969 1.3101788375 -0.0655169199

z- 0.008

C -0.7736064939 -1.2747380299 -0.0225042107  
C -1.6056696603 -0.1404259974 0.0057380904  
C -0.9731796409 1.1151030743 0.0215651927  
C 0.3800796501 1.2382246657 -0.0031165417  
C 1.1754968123 0.0928151068 -0.0676297623  
C 0.5797320027 -1.1688823295 -0.0680371203  
O -2.8708613786 -0.2463116688 0.0319217822  
O -1.8198437673 2.1758866565 0.0726133741  
C 2.610719059 0.1745037706 -0.1184673567  
O 3.1114067866 1.4250150337 0.024079285  
O -1.4336946493 -2.4608964122 0.0038131436  
O 3.3878291535 -0.7395261915 -0.2818987479  
H 1.2025456466 -2.0520071209 -0.0695761103  
H 0.8332755242 2.2173351674 0.0441252786  
H -2.3625497351 -2.193802149 0.1317512154  
H -2.693227339 1.7560021465 0.1781403459  
H 4.0666390292 1.3048272778 0.072775142

z+ 0.008

C -0.7734511314 -1.2745361962 0.0280182754  
C -1.6055888757 -0.140566957 -0.0023991527  
C -0.9732894269 1.1148913477 -0.0272812355

C 0.3800830706 1.2381823847 -0.0090400128  
C 1.1757602744 0.0931088607 0.0578273636  
C 0.5801110722 -1.1684770421 0.0673818196  
O -2.8710043745 -0.2467316982 -0.0221546965  
O -1.8202562131 2.1752710695 -0.0799374545  
C 2.6113363613 0.1750356114 0.1020170749  
O 3.1112034534 1.424581725 -0.0496635469  
O -1.4339389811 -2.4607171594 0.0100645134  
O 3.3889403228 -0.7382116334 0.2673321679  
H 1.2030027414 -2.0515353868 0.07114348  
H 0.8331443895 2.2169985471 -0.0631320973  
H -2.3632168238 -2.1934894966 -0.1144018668  
H -2.6940598079 1.7547542619 -0.1795203593  
H 4.0663149487 1.3045647619 -0.1009612723

### Gallic Acid (Radical Cation)

x- 0.010

C -0.9385255906 -1.1927522971 0.0023217677  
C -1.6700878412 -0.0103093336 0.0004577146  
C -1.0196884826 1.2640018697 -0.0041478028  
C 0.3636794319 1.3329150346 -0.0068095413  
C 1.0477885466 0.1625644772 -0.004893785  
C 0.4071453151 -1.1122502784 -0.0003621196  
O -2.9810107377 -0.0162198538 0.0028421125  
O -1.7570183307 2.3347110151 -0.0057204665  
C 2.5499311508 0.0988474885 -0.0075993114  
O 3.0968671029 1.2848593268 -0.0106200568  
O -1.709239563 -2.2957612152 0.0066615113  
O 3.0933692793 -0.9560137385 -0.0067516197  
H 1.0553267366 -1.9823277259 0.0007220927  
H 0.8680652998 2.2886399579 -0.0102032369  
H -1.2004977454 -3.1155524034 0.008606247  
H -3.3004784624 -0.9354586306 0.0061209738  
H -2.7040447418 2.1298614333 -0.0032135773  
H 4.0699796322 1.2314708735 -0.0121179025

x+ 0.010

C -0.9221799584 -1.2278975263 0.002441756  
C -1.6823936196 -0.0221701771 0.0006267166  
C -1.0255910902 1.2501970717 -0.0038241555  
C 0.3653299518 1.2919600861 -0.0063886504  
C 1.0491481358 0.1195628026 -0.0045374729  
C 0.4216054816 -1.1492192163 -0.0000956589  
O -2.9613764959 -0.0103995105 0.0028320595

O -1.7136796757 2.3396728702 -0.0054295833  
C 2.537559026 0.1184352467 -0.0071892682  
O 3.0633566984 1.3360751493 -0.0119668529  
O -1.6937722499 -2.3012847235 0.0065982058  
O 3.2006185872 -0.87352374 -0.0052034608  
H 1.0461470689 -2.0316797762 0.001116793  
H 0.863488267 2.2485628403 -0.0098316016  
H -1.2343518605 -3.1498117008 0.0076327999  
H -3.3853827902 -0.8943041735 0.0057315441  
H -2.6821655496 2.222196615 -0.003595024  
H 4.0252010732 1.2448538622 -0.0136251463

x- 0.002

C -0.9287891091 -1.2081575818 0.0023605509  
C -1.6728139998 -0.0128636575 0.0005305542  
C -1.0211455091 1.2606331652 -0.0040042098  
C 0.3638958009 1.3156847883 -0.0066278284  
C 1.0453971309 0.1428626943 -0.0047469806  
C 0.4117657827 -1.1296898784 -0.0002527095  
O -2.9686650656 -0.015481179 0.0028614012  
O -1.7377047468 2.3400355622 -0.0055779071  
C 2.5423233988 0.1059995565 -0.007347013  
O 3.0776807868 1.3063943627 -0.011336493  
O -1.7045148617 -2.296145867 0.0066286375  
O 3.1358002788 -0.9232358441 -0.0058220346  
H 1.0495974145 -2.0048610956 0.0009171778  
H 0.8680383072 2.2703515663 -0.0100402097  
H -1.2175164351 -3.1289592884 0.0080585507  
H -3.3239003905 -0.9243618814 0.0059425989  
H -2.6939865152 2.172014457 -0.0033756447  
H 4.0460987321 1.2410061207 -0.012875441

x+ 0.002

C -0.9260856438 -1.2150095641 0.0023859015  
C -1.6756432502 -0.0157214002 0.0005634219  
C -1.0226460192 1.2573666952 -0.0039453281  
C 0.3644517863 1.3074964893 -0.0065497069  
C 1.0458403492 0.1347253939 -0.0046805192  
C 0.4146567381 -1.136504592 -0.0002059764  
O -2.9653817154 -0.0138464435 0.0028573716  
O -1.7290332682 2.3403511948 -0.0055308868  
C 2.5400242649 0.1100825365 -0.0072884979  
O 3.0718545583 1.3164070856 -0.0115505724  
O -1.7009267209 -2.2976706108 0.006615961

O 3.1571933421 -0.9067401783 -0.0055927309  
H 1.0477979308 -2.0141558645 0.0009789531  
H 0.8668092607 2.2626055568 -0.0099700483  
H -1.223035768 -3.1357442457 0.0079170223  
H -3.3426027345 -0.915232202 0.0058717435  
H -2.6896945477 2.1898797701 -0.003458286  
H 4.0379824375 1.2429363788 -0.0131248219

x- 0.004

C -0.9303577683 -1.2045992107 0.0023479927  
C -1.6715994373 -0.0115391414 0.0005127605  
C -1.0204867374 1.2621639703 -0.0040334027  
C 0.3634989993 1.3198844085 -0.0066650825  
C 1.0454613236 0.1470931168 -0.0047775926  
C 0.4105076518 -1.1261406741 -0.00027333  
O -2.9707231152 -0.0162651657 0.0028591776  
O -1.7423747773 2.3397055049 -0.0056012816  
C 2.5437909135 0.1040035662 -0.0073770609  
O 3.081221931 1.3012523688 -0.0112313389  
O -1.7062403493 -2.2954512292 0.0066335548  
O 3.1252094839 -0.9314434393 -0.0059422703  
H 1.0508092643 -2.0000314558 0.0008889337  
H 0.8684119846 2.2744206308 -0.0100731059  
H -1.2146392148 -3.1255812673 0.0081324224  
H -3.3154175052 -0.9285725899 0.0059762161  
H -2.6963439329 2.1626838586 -0.0033318884  
H 4.0508322858 1.2396427486 -0.0127517041

x+ 0.004

C -0.9249444479 -1.2183039444 0.0023983649  
C -1.6772219456 -0.0172674729 0.0005790688  
C -1.0234466768 1.255642011 -0.0039149633  
C 0.3646694959 1.3035501148 -0.0065090057  
C 1.046345567 0.130862449 -0.0046457591  
C 0.4162567052 -1.1397425662 -0.000181202  
O -2.9641084297 -0.0129939449 0.0028524652  
O -1.7249906369 2.3403170487 -0.0055058802  
C 2.5391499891 0.1121608633 -0.0072600457  
O 3.0694869523 1.321294837 -0.0116547869  
O -1.6990843396 -2.298522019 0.0066083388  
O 3.1678530243 -0.8985297063 -0.0054883754  
H 1.0471922377 -2.0185889077 0.0010100801  
H 0.8660178117 2.2589701535 -0.0099332876  
H -1.22568718 -3.1391635438 0.0078507189

H -3.3527164035 -0.9103094471 0.005835562  
H -2.6877179647 2.198315683 -0.0034951369  
H 4.0345072414 1.243534392 -0.0132531558

x- 0.006

C -0.9330126145 -1.2007770445 0.0023345759  
C -1.6709605532 -0.0112611999 0.0004959266  
C -1.0201816802 1.2627664567 -0.0040720218  
C 0.3638624503 1.3242771399 -0.0067187881  
C 1.0461088863 0.1523700599 -0.0048270267  
C 0.4090721445 -1.1214451291 -0.0003149074  
O -2.9738242953 -0.0161858192 0.0028601548  
O -1.747053216 2.3378392878 -0.0056386667  
C 2.5456159912 0.1023510515 -0.0074566251  
O 3.0862899353 1.2959124485 -0.0110288242  
O -1.7073365701 -2.295687188 0.0066365161  
O 3.1144648757 -0.9396500959 -0.0061836241  
H 1.051922225 -1.9940908802 0.000816308  
H 0.8684571604 2.2792574177 -0.0101210043  
H -1.2099271691 -3.122325916 0.0083062943  
H -3.3101168142 -0.9308012618 0.0060263867  
H -2.6988387997 2.1516468213 -0.0032889643  
H 4.0570190437 1.2370298513 -0.0125327096

x+ 0.006

C -0.9239007021 -1.2215805034 0.002410115  
C -1.6789519869 -0.0188984139 0.0005996884  
C -1.0242969149 1.2538538682 -0.0038943937  
C 0.3648480984 1.2996419107 -0.0064982249  
C 1.0470525575 0.127065991 -0.0046460338  
C 0.4179747962 -1.142917205 -0.0001765046  
O -2.9630238338 -0.0121726551 0.0028699167  
O -1.721092627 2.3401631381 -0.0054841251  
C 2.538415972 0.1143142401 -0.0072984817  
O 3.0674934162 1.3262239361 -0.0117240641  
O -1.6971946847 -2.2994078497 0.0066151459  
O 3.1786819012 -0.890168755 -0.0053758339  
H 1.046712145 -2.0229814218 0.0010138336  
H 0.8650737766 2.2554453623 -0.0099388285  
H -1.228398144 -3.1426593028 0.0077949051  
H -3.3634089168 -0.9051384059 0.0058321204  
H -2.6858376431 2.206591932 -0.0035192236  
H 4.0314137904 1.2438501339 -0.013287011

x- 0.008

C -0.9356260303 -1.1968174522 0.0023246738  
C -1.6703837095 -0.0106881272 0.0004799547  
C -1.0198447286 1.2635053241 -0.0041136776  
C 0.3638347684 1.3286195014 -0.0067805457  
C 1.0468625431 0.1574172074 -0.0048820152  
C 0.4079766165 -1.1169326695 -0.0003533024  
O -2.9771726273 -0.0162973723 0.0028667422  
O -1.7519770859 2.3363628768 -0.0056763085  
C 2.5476657714 0.1005565381 -0.0075571691  
O 3.0913177282 1.2904583764 -0.0108280163  
O -1.7084506017 -2.29566356 0.0066524056  
O 3.1038318334 -0.9478965824 -0.0064224312  
H 1.0534396962 -1.9883164771 0.0007514181  
H 0.8683858768 2.2839347921 -0.0101845962  
H -1.20547993 -3.1189607019 0.0084538504  
H -3.3046732594 -0.9333886822 0.0060890284  
H -2.7013932398 2.1408410473 -0.0032413364  
H 4.0632473785 1.2344919611 -0.0122856746

x+ 0.008

C -0.9229650733 -1.2248043354 0.0024213161  
C -1.6807969398 -0.0206098784 0.0006211188  
C -1.025171528 1.25202098 -0.0038759666  
C 0.3650085405 1.2958345181 -0.0064939586  
C 1.0479592877 0.1234022867 -0.0046541945  
C 0.4197818659 -1.1459844409 -0.0001763113  
O -2.9621317905 -0.0113711243 0.0028914435  
O -1.7173739842 2.3398783735 -0.0054628297  
C 2.5378291964 0.1165157748 -0.0073523765  
O 3.0658702585 1.3311336576 -0.0117825679  
O -1.6952827308 -2.3003436628 0.0066245376  
O 3.1895248706 -0.8817826997 -0.0052649841  
H 1.04637917 -2.0272591144 0.001010794  
H 0.8640142382 2.2520887475 -0.0099532622  
H -1.2311353567 -3.1462112176 0.0077435509  
H -3.3745809623 -0.8997373327 0.0058365478  
H -2.684070366 2.214560352 -0.0035386407  
H 4.0287023037 1.2438951161 -0.0133012164

Zero Field

C -0.9273292937 -1.2116468991 0.0023633245  
C -1.6740078759 -0.0141660809 0.0005658494

C -1.0219503638 1.259024826 -0.0040157456  
C 0.3641915613 1.3116183845 -0.0067124231  
C 1.0454595254 0.1388005142 -0.0048617375  
C 0.4131880451 -1.1331823968 -0.0003233052  
O -2.9668153054 -0.0146691542 0.0029584087  
O -1.733469595 2.3402217353 -0.0055657418  
C 2.5411384507 0.1080084644 -0.0075840506  
O 3.0747603571 1.3112620332 -0.0113159309  
O -1.7029683239 -2.2967363594 0.0066686568  
O 3.1464324188 -0.9150583763 -0.0056382085  
H 1.0489465868 -2.0093845121 0.0008173763  
H 0.8672433612 2.2665945791 -0.0101743657  
H -1.2206071021 -3.1322590946 0.0080442909  
H -3.3326881393 -0.9199796777 0.0060407471  
H -2.6919726019 2.1808578488 -0.003364601  
H 4.0420092948 1.2419191656 -0.012608544

y- 0.010

C -0.9446789115 -1.1998052404 0.0022234657  
C -1.6954248664 -0.0252104106 0.0004657416  
C -1.0365042145 1.2453330231 -0.0040586417  
C 0.3729985517 1.3047249673 -0.0067454625  
C 1.0534658749 0.1464570243 -0.0049189411  
C 0.4013970834 -1.1169795154 -0.0004466551  
O -2.996270183 -0.0163385449 0.0027809124  
O -1.7144378604 2.3283465207 -0.0056695145  
C 2.5478609616 0.098320238 -0.0075162778  
O 3.0804227026 1.2889469253 -0.0107922536  
O -1.6839747926 -2.3299444622 0.0065318273  
O 3.1360308008 -0.9423647716 -0.0065304133  
H 1.0339059095 -1.9964087353 0.0007066342  
H 0.8581602577 2.2715041356 -0.0100712051  
H -1.1355679607 -3.1192076162 0.0088106687  
H -3.3710567125 -0.9122782449 0.0061782162  
H -2.6850430515 2.2278801512 -0.0034088042  
H 4.0502774109 1.2582505558 -0.0122462971

y+ 0.010

C -0.9148240228 -1.2139201031 0.0023318938  
C -1.6680042805 0.0072795634 0.0005330784  
C -1.0187600051 1.2720536131 -0.0037548321  
C 0.3295944083 1.2971489254 -0.0062055428  
C 1.0436449273 0.0870328073 -0.0043325153  
C 0.4511250167 -1.1552911568 -0.0000837164



O -2.9572178318 -0.0066035606 0.0027595392  
O -1.7510509773 2.3781160034 -0.0051836872  
C 2.5401473404 0.0989857345 -0.0068932782  
O 3.0508603909 1.3284019741 -0.0127720754  
O -1.6875601827 -2.2627864183 0.0062901131  
O 3.1844982569 -0.8921357379 -0.003758069  
H 1.0699810272 -2.0437179977 0.0011873833  
H 0.8595794417 2.2368219284 -0.0096435348  
H -1.251016163 -3.1323249088 0.0073778531  
H -3.328726672 -0.9123136109 0.0054638363  
H -2.6972196812 2.1824061413 -0.0035367052  
H 4.0165100071 1.2420728033 -0.0144867409

y- 0.002

C -0.931055957 -1.2092232567 0.0023637027  
C -1.6783414113 -0.0169664322 0.0005403529  
C -1.0246663632 1.2555928309 -0.0039939357  
C 0.3674064297 1.3105480336 -0.0066205482  
C 1.0474012724 0.142345466 -0.0047448561  
C 0.4097412664 -1.1292012809 -0.0002497454  
O -2.9727063401 -0.0148922497 0.002848522  
O -1.7292415607 2.3362505737 -0.0055987162  
C 2.5426082592 0.1069910781 -0.0073379587  
O 3.0766398995 1.3071204025 -0.0112940559  
O -1.7001836758 -2.3038502953 0.0066347646  
O 3.1434041689 -0.9203410755 -0.0059391482  
H 1.0452070011 -2.0057579289 0.0009302527  
H 0.8664966138 2.2680572745 -0.0100207566  
H -1.2044675911 -3.1303857029 0.0081019406  
H -3.3406776853 -0.9181365839 0.0059590941  
H -2.6904471271 2.188186417 -0.0034274921  
H 4.0444438007 1.2448887299 -0.0128584167

y+ 0.002

C -0.9234455538 -1.2138010161 0.0023785026  
C -1.6704034398 -0.0108464635 0.0005481444  
C -1.0193581217 1.2629940674 -0.0039496866  
C 0.3596347697 1.3117888727 -0.0065408555  
C 1.0434902622 0.1329352595 -0.0046650428  
C 0.4177114307 -1.1378087136 -0.0002006908  
O -2.9613717778 -0.0145697567 0.0028582189  
O -1.7371010936 2.345839804 -0.0054997053  
C 2.5394129603 0.1081417196 -0.0072666245  
O 3.070863367 1.3154197984 -0.0116348806

O -1.7038941814 -2.2898513351 0.006599389  
O 3.1501809543 -0.910158738 -0.0054224081  
H 1.0524905738 -2.0145837659 0.0009845117  
H 0.8682180589 2.2634691895 -0.0099697778  
H -1.2339350976 -3.1336666622 0.0078396728  
H -3.3256395133 -0.9216888624 0.0058448228  
H -2.692918823 2.1771005411 -0.0034118203  
H 4.0376262252 1.2405120613 -0.01319877

y- 0.004

C -0.9348887027 -1.2067391378 0.0023389369  
C -1.6826346093 -0.0195203689 0.0005351154  
C -1.0276489636 1.2522643682 -0.0040142332  
C 0.3698119602 1.3093581673 -0.0066735573  
C 1.0492900159 0.1449238687 -0.0048072033  
C 0.4069240333 -1.1253885796 -0.0003043034  
O -2.9788473548 -0.0149498143 0.0028545436  
O -1.7256346742 2.3328940015 -0.0056304374  
C 2.5442745646 0.1054818375 -0.0074212331  
O 3.0790535016 1.3027509752 -0.0111288709  
O -1.6970117331 -2.3103924323 0.0066377418  
O 3.1414283341 -0.9254225967 -0.0061206177  
H 1.0419837382 -2.0023912101 0.0008653775  
H 0.8644787688 2.2696255001 -0.0100652212  
H -1.1881837713 -3.1279511455 0.0082608145  
H -3.3489155931 -0.916151732 0.006029495  
H -2.689329697 2.1954887932 -0.0034220787  
H 4.0474111822 1.2473455056 -0.0126412685

y+ 0.004

C -0.9196521558 -1.215552348 0.00237795  
C -1.6671780952 -0.0069085853 0.000551578  
C -1.0172539461 1.2669596279 -0.0039420515  
C 0.353849254 1.3110284055 -0.0065291553  
C 1.0417560784 0.1249027502 -0.0046642446  
C 0.4236926281 -1.1428389028 -0.000205194  
O -2.9566048575 -0.0139617048 0.0028836755  
O -1.740883642 2.3527509635 -0.005435855  
C 2.5379226396 0.1073271635 -0.00730256  
O 3.0659132978 1.3193282778 -0.0118349403  
O -1.7033788416 -2.2826437638 0.0065689836  
O 3.1551924031 -0.9054480944 -0.0050179213  
H 1.0569190043 -2.0206556886 0.0009791313  
H 0.8681452473 2.2593590364 -0.009985163

H -1.2453118457 -3.1345275417 0.007708234  
H -3.319821785 -0.9225337235 0.005827998  
H -2.693951943 2.1750728995 -0.0033853419  
H 4.0322075592 1.2395672289 -0.0133021235

y- 0.006

C -0.938315227 -1.2043088385 0.0023115763  
C -1.686982416 -0.0216043066 0.0005213215  
C -1.030696282 1.2495744671 -0.0040312078  
C 0.3713518869 1.3078723895 -0.0067064561  
C 1.0508810791 0.1462014219 -0.0048494648  
C 0.4047369602 -1.1222523564 -0.0003457426  
O -2.9848125421 -0.0153223132 0.0028425559  
O -1.7219241689 2.3307140171 -0.0056538147  
C 2.5456817189 0.1034376116 -0.0074669388  
O 3.0802142287 1.2981652836 -0.0110036563  
O -1.6931313553 -2.3169238728 0.0066241139  
O 3.1395208539 -0.9309263836 -0.0062734924  
H 1.0391680889 -1.9998749279 0.0008207006  
H 0.8624505858 2.2704939496 -0.0100825111  
H -1.1710213962 -3.1252149799 0.0084044488  
H -3.356624719 -0.9146522614 0.0060876617  
H -2.688053376 2.205195559 -0.0034192555  
H 4.0491170799 1.2506515409 -0.0124868385

y+ 0.006

C -0.9166451665 -1.2161859712 0.0023639157  
C -1.6656436316 -0.0022704041 0.0005348894  
C -1.0164324744 1.27043861 -0.0038659623  
C 0.3460163785 1.3084725137 -0.0063790423  
C 1.040677463 0.1137829478 -0.004503054  
C 0.4314297783 -1.1478696333 -0.0001300945  
O -2.9540303314 -0.0129464855 0.0028035438  
O -1.7447051952 2.3611573065 -0.005352582  
C 2.5373867392 0.105259995 -0.0070656906  
O 3.0608836185 1.3223364181 -0.0122054222  
O -1.7003178344 -2.2754439008 0.0064717866  
O 3.1626717792 -0.9010719066 -0.0046102856  
H 1.0613125806 -2.0280426607 0.0010950591  
H 0.8664410141 2.2532860804 -0.0098147907  
H -1.2514768204 -3.1340179443 0.0075726965  
H -3.3177320439 -0.9219402513 0.0056534025  
H -2.6952174059 2.1764159775 -0.0034388304  
H 4.0269425524 1.2398653088 -0.013836539

y- 0.008

C -0.9414422043 -1.2019758741 0.0022803025  
C -1.6913147567 -0.023409457 0.0005054683  
C -1.0338063492 1.2473741966 -0.0040523105  
C 0.3722833526 1.3062656016 -0.0067486569  
C 1.0522356015 0.1466434526 -0.0049054661  
C 0.4029425817 -1.1196003185 -0.0003953754  
O -2.9906098964 -0.0159788563 0.0028362818  
O -1.7182185687 2.3293730188 -0.0056750267  
C 2.546907871 0.1010329551 -0.0075371489  
O 3.0806938837 1.2934268366 -0.01087947  
O -1.6888256131 -2.3234388793 0.0066115498  
O 3.1376835529 -0.9366858018 -0.006399549  
H 1.0366444296 -1.997936018 0.0007672558  
H 0.8602652622 2.2710356232 -0.0101132368  
H -1.153472972 -3.1222803703 0.0085491178  
H -3.3638297204 -0.9136321454 0.0061619746  
H -2.6866822447 2.2165888695 -0.0034121761  
H 4.0501067903 1.2544231668 -0.0123005341

y+ 0.008

C -0.9147902432 -1.2158438077 0.0023483343  
C -1.6656668338 0.0026298663 0.0005115321  
C -1.0166925947 1.272371048 -0.003777149  
C 0.3378367281 1.3039206188 -0.0061864636  
C 1.0409955127 0.1007788083 -0.0042988226  
C 0.440671869 -1.1522877744 -0.0000352411  
O -2.9538309445 -0.0104052627 0.0026922634  
O -1.7479249241 2.3699598266 -0.0052364526  
C 2.5376603361 0.1020989797 -0.006740811  
O 3.0548192811 1.325583924 -0.012713282  
O -1.6949447279 -2.2688572408 0.0063227117  
O 3.1721766392 -0.8968006672 -0.004043087  
H 1.0661422305 -2.0357567222 0.0012363219  
H 0.8640623644 2.2455209389 -0.00957567  
H -1.253339685 -3.1333140205 0.0073993207  
H -3.3201090101 -0.9185473391 0.0054407227  
H -2.6961241425 2.1792496173 -0.0034982189  
H 4.0206191446 1.2409252068 -0.0145530092

z- 0.010

C -0.9190747787 -1.2136014454 -0.0178892287  
C -1.670078751 -0.018623545 -0.0303465864  
C -1.0232883653 1.2569242211 -0.0736141391  
C 0.3616163995 1.3137494048 -0.0869000503  
C 1.0481174257 0.1431510379 -0.071855757  
C 0.421056653 -1.1315919323 -0.0574195585  
O -2.9622868318 -0.0250572842 -0.0105016796  
O -1.7393482536 2.3357117427 -0.101938884  
C 2.5425679739 0.12685852 -0.1107029507  
O 3.0680046648 1.2510454733 0.3153953095  
O -1.6881236891 -2.3059587766 0.0035565328  
O 3.1422597615 -0.8198226637 -0.5129590794  
H 1.0540906971 -2.0093114607 -0.0669697992  
H 0.8612250584 2.2708237731 -0.0723713515  
H -1.2495253131 -3.0964944247 0.3434086726  
H -3.3193411184 -0.9272761762 0.1058213462  
H -2.6902595948 2.1805531236 0.0255075187  
H 4.0339490621 1.1801464124 0.3750726846

z+ 0.010

C -0.9191237205 -1.2133812474 0.0228897402  
C -1.6700391891 -0.0185557827 0.0315627042  
C -1.0230893752 1.2571873654 0.065440528  
C 0.3620402824 1.3142122189 0.0734218072  
C 1.0484490548 0.1437137137 0.0622501235  
C 0.421141922 -1.1311142705 0.0570545363  
O -2.9624174958 -0.025048472 0.0165675228  
O -1.7389574954 2.3360528056 0.090312454  
C 2.5430420404 0.1273289309 0.0958778801  
O 3.0670758397 1.2492945852 -0.3374498232  
O -1.6880565681 -2.3061999266 0.0103424683  
O 3.1438253632 -0.8176150595 0.5006462883  
H 1.0542481353 -2.0087603765 0.0691345415  
H 0.861455018 2.2712712718 0.0519140891  
H -1.2508035535 -3.0978714267 -0.3285279462  
H -3.3196935206 -0.9279093134 -0.0936061836  
H -2.6903881732 2.1802807962 -0.0325496362  
H 4.0328524356 1.1783401874 -0.3999880942

z- 0.002

C -0.9270323536 -1.2117271384 -0.0024524718  
C -1.6740052394 -0.0144255575 -0.0059746429  
C -1.0219438365 1.2589484758 -0.0177648182

C 0.3640474657 1.3116150986 -0.0220969865  
C 1.0455838506 0.138856992 -0.0177270109  
C 0.4134651573 -1.133133569 -0.0119969864  
O -2.966688305 -0.015108417 0.000143044  
O -1.7335624402 2.340067418 -0.0243056217  
C 2.5410905252 0.1087216393 -0.0277944177  
O 3.0744359783 1.3092979095 0.0531833324  
O -1.7021654235 -2.2972397464 0.0046282147  
O 3.146124813 -0.911575257 -0.1064704542  
H 1.0488028004 -2.0096119923 -0.0136349565  
H 0.8672417747 2.2665429806 -0.0213773468  
H -1.2214049764 -3.1307553534 0.0748831899  
H -3.332343701 -0.9201777876 0.0268496847  
H -2.6917334555 2.1810680796 0.0025682625  
H 4.0416483659 1.2398622251 0.0646329853

z+ 0.002

C -0.927041549 -1.2116784011 0.0072141529  
C -1.6739978093 -0.0144050244 0.0070754819  
C -1.0219056506 1.2590041792 0.0098010593  
C 0.3641250897 1.3117073537 0.008893903  
C 1.0456422629 0.1389659788 0.0082853142  
C 0.4134803594 -1.1330353145 0.0115492168  
O -2.9667156213 -0.015097053 0.0055933773  
O -1.7334894035 2.3401365768 0.013176806  
C 2.5411793156 0.1088197603 0.0131496288  
O 3.0742325964 1.3089197766 -0.0760605409  
O -1.7021550992 -2.2972643015 0.0086618465  
O 3.1464319708 -0.9110991508 0.0950477463  
H 1.0488381984 -2.0094940261 0.0155671745  
H 0.8672816068 2.266628571 0.0013254685  
H -1.2215639451 -3.1310880412 -0.0589712933  
H -3.3324308218 -0.9202920771 -0.0150145087  
H -2.6917563917 2.1810307646 -0.0094134576  
H 4.0414058918 1.2394664289 -0.0905883756

z- 0.004

C -0.9260085894 -1.2119930371 -0.0069342135  
C -1.6734850225 -0.0149288426 -0.0123882958  
C -1.0220888788 1.258723634 -0.0316857493  
C 0.3637016199 1.311857642 -0.037766332  
C 1.0458595683 0.1393039783 -0.0308034827  
C 0.4144442097 -1.1330316204 -0.0235727057  
O -2.9660772664 -0.0164039362 -0.0025618038

O -1.7343151176 2.3395569957 -0.0434603603  
C 2.5412229215 0.1109828739 -0.0486533125  
O 3.073691257 1.3023064689 0.1193203328  
O -1.7004582932 -2.298308204 0.0032223384  
O 3.1454438143 -0.9003810039 -0.2095325083  
H 1.0494562033 -2.0096751402 -0.0278856639  
H 0.8665699265 2.266993909 -0.0331159573  
H -1.2250573586 -3.1263556364 0.1424813536  
H -3.3305170912 -0.9210897999 0.0475761454  
H -2.6915710463 2.1809885958 0.0080543702  
H 4.0407501435 1.232679123 0.1429988448

z+ 0.004

C -0.9260271965 -1.2118978182 0.0117485903  
C -1.6734705871 -0.0148900584 0.0135088655  
C -1.0220117357 1.258834679 0.0236849971  
C 0.3638578281 1.312041839 0.0245152319  
C 1.0459781839 0.1395212677 0.0213444098  
C 0.4144748853 -1.1328367115 0.0231602252  
O -2.9661319941 -0.0163869674 0.0083333597  
O -1.734167902 2.3396963526 0.0322530001  
C 2.5414034648 0.1111795818 0.0339766966  
O 3.073280446 1.301551999 -0.1420984048  
O -1.7004385252 -2.2983622491 0.0101828123  
O 3.1460742036 -0.8994238827 0.1979783804  
H 1.0495272734 -2.0094408364 0.0298888805  
H 0.866652035 2.2671649495 0.0129834848  
H -1.2253960023 -3.1270081756 -0.1266409897  
H -3.3306904467 -0.9213234738 -0.0357138184  
H -2.6916162327 2.1809138019 -0.0149610927  
H 4.0402633022 1.2318917028 -0.1688516283

z- 0.006

C -0.9243381055 -1.2124194041 -0.0111310679  
C -1.6726143656 -0.0158063302 -0.0186424102  
C -1.0223051828 1.2582954869 -0.0455736346  
C 0.3632595722 1.3122612775 -0.0535804025  
C 1.0463970544 0.1401310811 -0.0440213613  
C 0.4160474305 -1.1327887217 -0.0350628689  
O -2.965098974 -0.0184686927 -0.0053641701  
O -1.7354358184 2.3386536379 -0.0627705918  
C 2.5414782586 0.1147213832 -0.0693173671  
O 3.0722121961 1.2906028584 0.1843392247  
O -1.6975961153 -2.3001455055 0.0023564368

O 3.1445600325 -0.8815918637 -0.3109344246  
H 1.0505573843 -2.0096963659 -0.0416413377  
H 0.865451917 2.267809741 -0.0452462285  
H -1.2311580384 -3.1192340132 0.2097558945  
H -3.3276379333 -0.9225324842 0.0677011532  
H -2.6911857763 2.1808557639 0.0138513179  
H 4.0389674639 1.2205781514 0.2205748383

z+ 0.006

C -0.924364184 -1.2122794475 0.0160451865  
C -1.6725915991 -0.0157495253 0.0197942945  
C -1.0221906882 1.2584642161 0.0375096822  
C 0.3634935254 1.3125407187 0.040271377  
C 1.0465746828 0.1404602799 0.0345647519  
C 0.4160961498 -1.1324978784 0.0347216578  
O -2.9651765034 -0.0184468604 0.0111805747  
O -1.7352142538 2.3388677714 0.0513956632  
C 2.5417458161 0.1150179567 0.0545961837  
O 3.0715965693 1.2895000661 -0.2069427444  
O -1.6975580495 -2.3002469253 0.0112439252  
O 3.1455056656 -0.8801940082 0.2991124613  
H 1.0506679157 -2.0093463553 0.0437554443  
H 0.8655769981 2.2680697981 0.0250010153  
H -1.2317154496 -3.1201884267 -0.1940355564  
H -3.3278683906 -0.9228946541 -0.0557811656  
H -2.6912550898 2.1807304114 -0.0208839463  
H 4.0382378853 1.2194188628 -0.246255805

z- 0.008

C -0.9220275228 -1.2129806494 -0.015000172  
C -1.6714835514 -0.0170214145 -0.0246586659  
C -1.0227033407 1.2577171824 -0.0594472114  
C 0.3625293255 1.3128737356 -0.0698419964  
C 1.0471255527 0.1413558538 -0.0576750541  
C 0.4182516252 -1.1323623807 -0.0464668257  
O -2.9638113549 -0.02136617 -0.0079943708  
O -1.7371278185 2.3374091813 -0.081923791  
C 2.5419260773 0.1200047505 -0.0899092967  
O 3.0703662572 1.2737777702 0.2493234272  
O -1.6935204401 -2.3027155616 0.0020980276  
O 3.1435609299 -0.8549910424 -0.4115242691  
H 1.0520985578 -2.009623602 -0.0548318693  
H 0.8637193125 2.2690193671 -0.0581243938  
H -1.2395026947 -3.1092343969 0.2767991226



H -3.3238109322 -0.9246408906 0.0869996836  
H -2.6907742383 2.1806891975 0.0198229183  
H 4.0367452555 1.2033150697 0.2976477368

z+ 0.008

C -0.9220682503 -1.212801111 0.0199440607  
C -1.6714483117 -0.0169599196 0.0258625966  
C -1.0225414156 1.2579283562 0.051373353  
C 0.3628640753 1.3132399769 0.0564728829  
C 1.0473796414 0.1417983242 0.0481661353  
C 0.4183143844 -1.1319761465 0.0461335688  
O -2.9639140968 -0.0213419922 0.0139729592  
O -1.7368130758 2.3376821148 0.0705307346  
C 2.5422927049 0.1203841493 0.0751090854  
O 3.0695518297 1.2723823273 -0.2716135755  
O -1.6934519668 -2.3029012715 0.011611527  
O 3.1448152035 -0.853219553 0.3993201742  
H 1.0522219143 -2.0091760731 0.0570038121  
H 0.8638955533 2.2693704796 0.0377837366  
H -1.240374664 -3.1104186383 -0.2616320088  
H -3.3240914512 -0.9251318232 -0.0749014199  
H -2.6908511776 2.1805004522 -0.0268557356  
H 4.0357801031 1.2018663478 -0.3229888866

Caffeic Acid (Neutral)

z- 0.010

C 1.2530201524 0.0670417982 -0.6897109768  
C 0.053198156 -0.1394577304 -0.0409613567  
C 0.0263526164 -0.237463611 1.323910441  
C 1.1939124563 -0.1296539983 2.0617250319  
C 2.3854359033 0.0671286066 1.3915076963  
C 2.416464262 0.1680495871 0.020522739  
O -1.0879171987 -0.2453953727 -0.7668743614  
C 1.2305648798 -0.2113356468 3.5193354049  
C 0.2169244466 -0.1897122323 4.3555069492  
C 0.5075486314 -0.2678046761 5.8071638181  
O -0.5963145875 -0.2127681233 6.5343925761  
O 1.1971194191 0.1555271251 -2.0639292093  
O 1.6063685865 -0.365586883 6.2572763344  
H 2.2148994703 -0.2791607033 3.9704307338  
H -0.8197745589 -0.1048195985 4.061356206  
H -0.3662790839 -0.2593773795 7.476372002  
H 2.0651287289 0.3938060118 -2.392598173  
H -0.8650698802 -0.1236996041 -1.6942021707

H 3.3565175807 0.3256898687 -0.4956936357  
H 3.3015370975 0.1473800275 1.9592552408  
H -0.924526078 -0.4047154655 1.8097987101

z+ 0.010

C 1.2691480124 0.051484393 -0.6873547922  
C 0.057061794 -0.0716369174 0.0017969939  
C 0.0581816764 -0.1207104824 1.3615814849  
C 1.2523972174 -0.0484291595 2.0763049752  
C 2.4385205957 0.0747554451 1.3797497377  
C 2.4511535334 0.1242628773 0.003053272  
O -1.0903129032 -0.140288429 -0.6746432547  
C 1.2901316175 -0.1007433116 3.5145219593  
C 0.2600714985 -0.2325524094 4.3490998062  
C 0.4634878864 -0.2709240803 5.7746919631  
O -0.6956409809 -0.4218256055 6.4577014063  
O 1.1395629019 0.0879562824 -2.0133196306  
O 1.496088566 -0.18792764 6.3933139528  
H 2.2742574244 -0.0256594841 3.9658973369  
H -0.7590866992 -0.3207076144 4.0062035176  
H -0.436780279 -0.4403663395 7.3856468228  
H 1.9674481702 0.1631628058 -2.500481734  
H -0.9290541341 -0.0997116552 -1.6280167709  
H 3.3825531614 0.2193069438 -0.5388365994  
H 3.3729947881 0.1316087467 1.9213606383  
H -0.8970728473 -0.2173823657 1.8563129147

z- 0.002

C 1.2590669295 0.0526287172 -0.6881027658  
C 0.0535546329 -0.0800726159 -0.0169889742  
C 0.04116323 -0.1359002708 1.3470455155  
C 1.2235381151 -0.0613761618 2.0678036435  
C 2.4127400382 0.0700993085 1.383846526  
C 2.4328957772 0.1273280967 0.0074549333  
O -1.0963196796 -0.1527504573 -0.7151117033  
C 1.259214424 -0.1161448907 3.5234409767  
C 0.2384204758 -0.235720832 4.3476707988  
C 0.4865736768 -0.2713072117 5.7937725838  
O -0.643469917 -0.3924922729 6.4921772536  
O 1.1675943304 0.0994918245 -2.0446143534  
O 1.5581472447 -0.2024676903 6.3192321621  
H 2.2411268395 -0.0502880268 3.9796121323  
H -0.7901093014 -0.3102371156 4.0271677448  
H -0.4099722606 -0.4085667083 7.430797616

H 2.0333626742 0.1953452223 -2.4470458471  
H -0.8988942676 -0.0952306244 -1.6565354277  
H 3.3705618728 0.2310527581 -0.5240613636  
H 3.3400045612 0.1292981062 1.9360915689  
H -0.9140883961 -0.239017155 1.8409309799

z+ 0.002

C 1.26195835 0.0516168126 -0.6871136026  
C 0.0554715988 -0.0748075174 -0.0085072267  
C 0.0493985262 -0.1266535739 1.3542246875  
C 1.2365353924 -0.0542423427 2.0702925818  
C 2.4234137731 0.0717374336 1.3818882523  
C 2.4389578546 0.1245669499 0.0044615806  
O -1.0950568327 -0.1449002279 -0.6970284674  
C 1.2722348484 -0.1073894808 3.5223071312  
C 0.2479140473 -0.2365406336 4.3458675972  
C 0.4771667957 -0.2714049729 5.786998219  
O -0.6636329113 -0.4099610986 6.4759637145  
O 1.1546988013 0.0934251684 -2.0338635617  
O 1.5340542057 -0.1905645454 6.3458595932  
H 2.253783775 -0.0331624798 3.978216141  
H -0.7762285781 -0.3216419703 4.015438278  
H -0.4257226238 -0.4252269354 7.4120168258  
H 2.0082468044 0.1767350843 -2.4664118  
H -0.9106926182 -0.0955578806 -1.642859174  
H 3.3739886465 0.2232060372 -0.5316982671  
H 3.3540636446 0.129332281 1.9289416345  
H -0.9054425 -0.2248941077 1.8495898631

z- 0.004

C 1.2575201388 0.0560220355 -0.6886488425  
C 0.05294747 -0.0897953383 -0.0221394809  
C 0.0372278976 -0.1531971666 1.3422635489  
C 1.2166332412 -0.0730447696 2.0663675307  
C 2.406618792 0.0697803786 1.3851652597  
C 2.4292667195 0.1351212734 0.0096786492  
O -1.0956452578 -0.168399937 -0.726163618  
C 1.2526684751 -0.1320821547 3.5230783425  
C 0.2326063361 -0.2280626895 4.3494523237  
C 0.4917414003 -0.2708211018 5.7972496508  
O -0.6337653828 -0.3616286882 6.5022598576  
O 1.174401613 0.1100922074 -2.0497921818  
O 1.5721882001 -0.2300877992 6.3044785299  
H 2.2361918904 -0.088713906 3.9784469778

H -0.7997172123 -0.2756731909 4.0352960039  
H -0.4009542396 -0.3834619622 7.4417367738  
H 2.0447507043 0.2254676298 -2.435922378  
H -0.891595934 -0.1008235995 -1.6648849853  
H 3.3678863826 0.2484370148 -0.5187190932  
H 3.3316729881 0.1324130255 1.9406109743  
H -0.9175332226 -0.2678692615 1.8347701567

z+ 0.004

C 1.2635662529 0.0513422317 -0.6868902082  
C 0.0562262274 -0.0732051185 -0.0051026951  
C 0.052639674 -0.1237646224 1.3569742155  
C 1.2418068662 -0.05182485 2.0716224946  
C 2.4279630486 0.0725412028 1.3811641475  
C 2.4419345884 0.1238970172 0.0035275055  
O -1.0940921818 -0.1425276827 -0.6896636929  
C 1.2777310077 -0.1045489494 3.5211336943  
C 0.2518378627 -0.2361907034 4.3457552214  
C 0.4731406236 -0.2713944507 5.7838119148  
O -0.6726092443 -0.4155022164 6.4695112609  
O 1.1495132452 0.0913213781 -2.0286373133  
O 1.5232600501 -0.1876126577 6.3583773557  
H 2.2595232799 -0.0283465259 3.976411595  
H -0.7705847113 -0.3240456148 4.0113029806  
H -0.4312029556 -0.4309686789 7.4039938399  
H 1.9967298977 0.1706968141 -2.4754836246  
H -0.9158711894 -0.0961515947 -1.6375155992  
H 3.375830843 0.2209154249 -0.5345193344  
H 3.3599343249 0.1297058036 1.9262295912  
H -0.9021665098 -0.2206642071 1.8525806506

z- 0.006

C 1.25571199 0.0616407312 -0.6890032208  
C 0.0527931593 -0.1050551025 -0.027887014  
C 0.0338330484 -0.1803767468 1.3366828873  
C 1.2096458571 -0.0909122565 2.0647794324  
C 2.3999307464 0.070228527 1.3868768834  
C 2.4249154558 0.1481887379 0.0127178847  
O -1.093756712 -0.193313897 -0.7385433175  
C 1.2461531004 -0.1575985994 3.5220971582  
C 0.2268145295 -0.2146433122 4.3515008617  
C 0.4969621402 -0.2704407558 5.8006304299  
O -0.6234564037 -0.3128325489 6.5130675678  
O 1.1811158882 0.126795183 -2.0545540681

O 1.5857616176 -0.2764971862 6.2887702512  
H 2.2313113613 -0.1517545465 3.9760124751  
H -0.8089511986 -0.2174616823 4.044263962  
H -0.3912622166 -0.3445173462 7.4532702968  
H 2.0542953149 0.2712794387 -2.4232541608  
H -0.8833492449 -0.1108718694 -1.6740932829  
H 3.3639478998 0.2768649495 -0.5120077393  
H 3.3223271203 0.1385907682 1.9459676053  
H -0.9196324533 -0.313640486 1.8272891076

z+ 0.006

C 1.2653066355 0.0513797657 -0.686826385  
C 0.0567872521 -0.0724575257 -0.0022221531  
C 0.0552284003 -0.1223884367 1.3591144858  
C 1.2462652114 -0.0504179489 2.0730394091  
C 2.4319605639 0.0733290639 1.380612972  
C 2.4448983911 0.1239229331 0.002960019  
O -1.0929010385 -0.1414965074 -0.6835085897  
C 1.2825790004 -0.1030099681 3.5194752641  
C 0.2551381255 -0.235052053 4.3462312577  
C 0.469536864 -0.2712787154 5.7807017711  
O -0.6809895031 -0.4183605638 6.4642810271  
O 1.1451559908 0.0900608285 -2.0234742456  
O 1.5134308619 -0.1871104651 6.3703489445  
H 2.2649498423 -0.0268430368 3.9737806122  
H -0.7659732744 -0.3233337936 4.0084087298  
H -0.4349606711 -0.4346941156 7.3969060979  
H 1.9859191989 0.1673177793 -2.4841672551  
H -0.9204887099 -0.0973344457 -1.6332629462  
H 3.3778124309 0.2201200047 -0.536602397  
H 3.3650273081 0.1303379045 1.9240637988  
H -0.89957188 -0.2190187039 1.8547235826

z- 0.008

C 1.2539793681 0.06618549 -0.6892534487  
C 0.0528811356 -0.1222200613 -0.0340744816  
C 0.0304145938 -0.2098266207 1.3306116445  
C 1.2022437422 -0.1104366111 2.0632266702  
C 2.3928370715 0.0700954102 1.3890045209  
C 2.4203854323 0.1607895054 0.0164131189  
O -1.0911230052 -0.2205832159 -0.751986178  
C 1.239022002 -0.185570334 3.5207913711  
C 0.221772415 -0.2008349872 4.3534648956  
C 0.5021220395 -0.2698738625 5.803849213

O -0.6110721808 -0.259966157 6.5237175934  
O 1.1883035146 0.143269744 -2.059106072  
O 1.5968159312 -0.3261016553 6.2729279378  
H 2.2243889013 -0.2197457102 3.9731667318  
H -0.8152714911 -0.156063391 4.0528509482  
H -0.3800002666 -0.3009615184 7.4647427911  
H 2.0615410873 0.3270384448 -2.4089275816  
H -0.8745873499 -0.119705174 -1.6837841665  
H 3.3597163048 0.3054581587 -0.5042366839  
H 3.3122456165 0.1447799864 1.9521507195  
H -0.9215038622 -0.3620554408 1.8190344561

z+ 0.008

C 1.2671673808 0.0514275318 -0.6869651571  
C 0.0570832551 -0.07194502 0.0000905827  
C 0.0570915246 -0.1213837006 1.3606674852  
C 1.2498121143 -0.0492820402 2.0745951407  
C 2.4354739597 0.0740809029 1.3801704628  
C 2.4479519109 0.1240561198 0.002802311  
O -1.0916234963 -0.1407904504 -0.6784970245  
C 1.2867076275 -0.1017325661 3.5172972311  
C 0.2578825421 -0.2338033267 4.3473152199  
C 0.4663400848 -0.2711334852 5.7776536166  
O -0.6886569251 -0.420429356 6.4602880892  
O 1.1417951767 0.088926625 -2.0183629615  
O 1.5043915452 -0.1873027094 6.3819396513  
H 2.2698593554 -0.026020585 3.9703150891  
H -0.7621419189 -0.322133679 4.0066718152  
H -0.4368479505 -0.4377993068 7.3907513133  
H 1.9761007901 0.1648483042 -2.4924832085  
H -0.9248395348 -0.0985504188 -1.6300869242  
H 3.3800371693 0.2195994046 -0.538032098  
H 3.3693804231 0.1309928565 1.9224613203  
H -0.8978540342 -0.2179531008 1.8559920453

Zero Field

C 1.2604127009 0.0524783538 -0.6875896984  
C 0.0546507757 -0.0779693679 -0.0125466202  
C 0.0458693428 -0.1323127105 1.350853332  
C 1.2306750781 -0.0584915255 2.0689173541  
C 2.4184525702 0.0709514648 1.3827243644  
C 2.435830672 0.1265343001 0.0057672608  
O -1.0956003168 -0.1497655603 -0.7055260184  
C 1.2662568825 -0.1127486282 3.5230283682

C 0.2434367288 -0.2356453972 4.3464770582  
C 0.4816361114 -0.2715780019 5.7905739799  
O -0.6540740363 -0.3993803997 6.4837247692  
O 1.1605975351 0.0971323616 -2.0391179191  
O 1.5458613027 -0.1979612739 6.3329871158  
H 2.2481345877 -0.0442009466 3.9789992014  
H -0.783016682 -0.3136792007 4.0208146375  
H -0.4195059295 -0.4153818429 7.4213491281  
H 2.0201143016 0.1877705795 -2.4569703663  
H -0.9050726423 -0.0960434538 -1.6492336759  
H 3.3719636702 0.2282853932 -0.5283672501  
H 3.3475303798 0.1295107892 1.9321410557  
H -0.9090420327 -0.2338329328 1.8455779232

x- 0.010

C 1.2582628013 0.0193681766 -0.6829578058  
C 0.0490522522 -0.0229709782 -0.0040032269  
C 0.0338656462 -0.03162987 1.35767898  
C 1.2243494567 0.005406047 2.0728617226  
C 2.41633879 0.0595117973 1.3835621593  
C 2.4375473835 0.0607450851 0.005665098  
O -1.1052500628 -0.0499534282 -0.7191199617  
C 1.2570813143 -0.015836676 3.5266248563  
C 0.248170648 -0.2680157884 4.3417896937  
C 0.4693626444 -0.2534740202 5.7846569112  
O -0.6322128347 -0.6137710849 6.4828207089  
O 1.1515572236 0.0239779464 -2.034784997  
O 1.4789216701 0.0330181182 6.3474980176  
H 2.2193805751 0.1832886029 3.9873039414  
H -0.7451520333 -0.5157011811 3.9981750506  
H -0.355527363 -0.6033750372 7.4095457666  
H 2.0137283525 0.0458090281 -2.4616889706  
H -0.8629388038 -0.0384486141 -1.6532850066  
H 3.3798043509 0.0967498833 -0.526122307  
H 3.3505078047 0.0945939259 1.926756085  
H -0.9217388157 -0.0556199325 1.8616072847

x+ 0.010

C 1.2634219889 0.0494231438 -0.6904536966  
C 0.0623490066 -0.1252203527 -0.0148919837  
C 0.0661815002 -0.200305634 1.351664995  
C 1.2484893059 -0.1068801402 2.0671551542  
C 2.4325822802 0.0572735049 1.3794986177  
C 2.4398172945 0.1361872991 0.0026264254

O -1.0889526103 -0.2183235911 -0.6779694345  
C 1.2822210822 -0.1658082829 3.5231277374  
C 0.2535200115 -0.2122472304 4.3440529658  
C 0.4796483776 -0.2611772787 5.79393605  
O -0.6625638117 -0.2884824158 6.4588317108  
O 1.1670383753 0.11140174 -2.042834558  
O 1.5535017653 -0.274388885 6.3366638129  
H 2.2657422139 -0.1621027559 3.9809583951  
H -0.7770170121 -0.2098236993 4.0198589183  
H -0.490947943 -0.3183264325 7.4095197796  
H 1.9903370204 0.3926775986 -2.4440502245  
H -0.9632825486 -0.1128259214 -1.6280660304  
H 3.3696706115 0.26517072 -0.5388979229  
H 3.3605953491 0.1294833569 1.9308477761  
H -0.8872412576 -0.3320327436 1.8430055123

x- 0.002

C 1.2602512463 0.0486065886 -0.686933068  
C 0.0534837647 -0.0681338114 -0.0114899838  
C 0.0425742653 -0.1153125891 1.3514788699  
C 1.2282498305 -0.0472257258 2.0695470667  
C 2.4170303291 0.0707419879 1.3830549075  
C 2.4360823105 0.1180489093 0.005902089  
O -1.0972378032 -0.1333077631 -0.7095940738  
C 1.2638598197 -0.0974278923 3.5233812907  
C 0.2427776734 -0.2416279041 4.3463736792  
C 0.4809329967 -0.2704576504 5.7894761277  
O -0.652364079 -0.4319653728 6.4861163266  
O 1.1596959576 0.0867658815 -2.0386483157  
O 1.5402291827 -0.1668303673 6.3339425422  
H 2.2439099132 -0.0084632976 3.9798740067  
H -0.7807143237 -0.3455541366 4.0188128278  
H -0.4067912069 -0.4433294777 7.4210487899  
H 2.0206470928 0.1583393547 -2.4582247046  
H -0.8951204811 -0.0890773146 -1.6515005809  
H 3.3736817807 0.2097530564 -0.5272334898  
H 3.3467450591 0.1255260389 1.9317062412  
H -0.9128123283 -0.2053965144 1.8474934513

x+ 0.002

C 1.2607012082 0.0538709623 -0.6880950199  
C 0.0556397985 -0.0851826735 -0.0131845442  
C 0.0487655795 -0.1437396631 1.3506935693  
C 1.23302165 -0.0662800235 2.0686074507



C 2.4201334135 0.0702238243 1.3823598849  
C 2.4360945708 0.1307816326 0.0054353175  
O -1.0946460911 -0.1612640148 -0.7008060445  
C 1.2684993043 -0.1224322771 3.5229142383  
C 0.2446944193 -0.2322694552 4.3463909757  
C 0.4819317624 -0.2714131007 5.7910870021  
O -0.6551692378 -0.3781772832 6.4799836783  
O 1.1616723824 0.1026286877 -2.0397268103  
O 1.5493001813 -0.2169514841 6.3324809899  
H 2.2509679444 -0.0657099324 3.9791232119  
H -0.7831749548 -0.2949749391 4.0217307451  
H -0.4309972082 -0.3967427114 7.4200016513  
H 2.019518893 0.2120092726 -2.4555271934  
H -0.9158134865 -0.0992465521 -1.6461889348  
H 3.3711230478 0.2388126245 -0.5296581756  
H 3.348760688 0.1314399569 1.932431119  
H -0.9059128651 -0.2517108505 1.8445308886

x- 0.004

C 1.260064713 0.0430172022 -0.686279116  
C 0.0523455641 -0.0579050127 -0.0101984603  
C 0.03972995 -0.0967509346 1.3524060852  
C 1.2264087627 -0.0352040398 2.0701924933  
C 2.4161520154 0.0693788275 1.3832460202  
C 2.4364429856 0.1068834302 0.0058599674  
O -1.0989750964 -0.1153155216 -0.7130504712  
C 1.2617354146 -0.0800638993 3.5239177169  
C 0.242860552 -0.248178762 4.3458803586  
C 0.4795960057 -0.2682957603 5.788550574  
O -0.6497071683 -0.4694382146 6.4875116139  
O 1.1584812533 0.0735600137 -2.0380742364  
O 1.5317635522 -0.128120409 6.3359585919  
H 2.2391518471 0.0324570091 3.9810667767  
H -0.7762756244 -0.3823318178 4.0157437807  
H -0.3948693422 -0.4754193032 7.4201191673  
H 2.0201064192 0.1318263565 -2.4593645308  
H -0.8859586235 -0.0799402598 -1.6530836007  
H 3.3754292409 0.1867396648 -0.5266398775  
H 3.3467144888 0.119956222 1.9308610228  
H -0.9160859099 -0.1731827911 1.8499601241

x+ 0.004

C 1.2609493313 0.054866126 -0.688685921  
C 0.0568210322 -0.0934156406 -0.0137385799

C 0.0523616183 -0.1565428668 1.3507187473  
C 1.2360678375 -0.075135622 2.0682268967  
C 2.4223952632 0.0688509927 1.3817799059  
C 2.4364226548 0.1346538603 0.0049309672  
O -1.0935821553 -0.1739954185 -0.6955512865  
C 1.2713247956 -0.1330131691 3.5228583298  
C 0.2463785665 -0.2279744891 4.3460943103  
C 0.481909497 -0.2706099292 5.7918670128  
O -0.6565064309 -0.3559438018 6.475693654  
O 1.1624933974 0.1079083336 -2.0402837817  
O 1.5517446557 -0.2349942273 6.3327782185  
H 2.2544061266 -0.0895230442 3.9792018704  
H -0.7826999313 -0.2740226185 4.0221354246  
H -0.444327916 -0.3774973263 7.4183781739  
H 2.0174524652 0.2419326914 -2.4538745358  
H -0.9273299862 -0.1025531681 -1.642497652  
H 3.3701454171 0.2491552014 -0.531500404  
H 3.3507012281 0.1328800266 1.9323367814  
H -0.9020164668 -0.2713539104 1.8437158681

x- 0.006

C 1.2597140251 0.0360939147 -0.6854293747  
C 0.0511950505 -0.0466295583 -0.0084911826  
C 0.0372763487 -0.0759576769 1.3537898994  
C 1.2251315929 -0.021954133 2.0709779559  
C 2.4157747439 0.0670860791 1.3833650141  
C 2.4368781106 0.0932906646 0.0057430404  
O -1.1009590198 -0.0948777878 -0.7157352825  
C 1.2598996374 -0.0600547724 3.5246592215  
C 0.2438353114 -0.2550710255 4.3449505406  
C 0.4773670445 -0.2647761928 5.7874505964  
O -0.6457207746 -0.5134948448 6.4873835269  
O 1.1567599342 0.0582234207 -2.0372756163  
O 1.5192113633 -0.0807994744 6.3389907046  
H 2.2334892889 0.0795653169 3.9827755407  
H -0.7689271329 -0.4243487591 4.0112368206  
H -0.3827164831 -0.5137218433 7.4178619408  
H 2.0188074216 0.1032263508 -2.4603946491  
H -0.877643081 -0.0682252321 -1.653852032  
H 3.3771529465 0.1595450021 -0.5263462916  
H 3.3473813204 0.1128856082 1.9297103274  
H -0.9187966487 -0.1363330567 1.8532132995

x+ 0.006

C 1.2613043883 0.0549315282 -0.6892688651  
C 0.0581525455 -0.1021970564 -0.0141301073  
C 0.0563464222 -0.1695964841 1.3509350701  
C 1.2396061473 -0.0843328083 2.0678763906  
C 2.4251196502 0.0666751557 1.38108351  
C 2.4369871852 0.1373231137 0.0042520806  
O -1.0924927112 -0.1871044496 -0.689885732  
C 1.2745383452 -0.1433592174 3.5228814343  
C 0.2484266541 -0.2233696503 4.3456280035  
C 0.4815598798 -0.268901354 5.7926044831  
O -0.6580828532 -0.3346620173 6.4707382345  
O 1.1632876948 0.1118794516 -2.0408851463  
O 1.5532405338 -0.2503102288 6.3335853289  
H 2.2579926804 -0.1127309738 3.9795300522  
H -0.781478255 -0.2534948506 4.021992261  
H -0.4586142676 -0.359137114 7.4160953012  
H 2.0136560929 0.2768987947 -2.4518250194  
H -0.9393872678 -0.1053593026 -1.6381883068  
H 3.3693926245 0.2576878054 -0.5336794929  
H 3.353246747 0.1334619695 1.9319642153  
H -0.8976912363 -0.2906303117 1.8432803046

x- 0.008

C 1.2591202339 0.0280394737 -0.684326116  
C 0.0500850465 -0.0348025893 -0.0063883029  
C 0.0353198871 -0.0538705014 1.3555911896  
C 1.2244688098 -0.0081641118 2.0718800544  
C 2.4158759243 0.0637582882 1.3834492986  
C 2.4372794317 0.0776254355 0.00564665  
O -1.1030980236 -0.072749757 -0.7176848278  
C 1.2583749345 -0.0382491823 3.5255791736  
C 0.2456929959 -0.2618779882 4.3435558424  
C 0.4739930635 -0.2597912033 5.7861474433  
O -0.6399745505 -0.5624488314 6.485718345  
O 1.1544417484 0.0413379863 -2.0361814418  
O 1.5016575699 -0.0261680938 6.3429489673  
H 2.2268635569 0.1308479128 3.9849049904  
H -0.7584090574 -0.469759888 4.0052713413  
H -0.3698242898 -0.55699437 7.4142662872  
H 2.0166476057 0.0742204792 -2.4611862103  
H -0.8700562064 -0.0541804058 -1.6538458627  
H 3.3786581702 0.1289990746 -0.5262343946  
H 3.3487025975 0.1043307547 1.9282993702  
H -0.9207084479 -0.0964304828 1.8571722026

x+ 0.008

C 1.2618436894 0.0539422226 -0.6898445051  
C 0.0598013699 -0.1123327982 -0.0144097971  
C 0.0609205966 -0.1840322845 1.3513211797  
C 1.243776753 -0.0946581519 2.0675267504  
C 2.4284299469 0.0634434974 1.380260766  
C 2.4378664877 0.1388579381 0.0034325289  
O -1.0911758276 -0.2017121651 -0.6838315349  
C 1.2782655651 -0.1543656435 3.5229661021  
C 0.2508659026 -0.2177117551 4.3449687396  
C 0.480845669 -0.2659921154 5.7932942986  
O -0.6601211761 -0.3126972106 6.4650478471  
O 1.1642544991 0.1144876147 -2.0415743441  
O 1.5538187622 -0.2639469862 6.3349085221  
H 2.2619056806 -0.1377094795 3.9800764756  
H -0.7795340633 -0.2309300367 4.0212432534  
H -0.4742226388 -0.3403805852 7.4130748702  
H 2.006745585 0.3212192621 -2.4489925546  
H -0.9518680663 -0.1084000576 -1.6332071035  
H 3.3688984134 0.2647386196 -0.5361873171  
H 3.3564888086 0.1330864821 1.9313448754  
H -0.8926949571 -0.311234367 1.8431649472

y- 0.010

C 1.2615896305 0.1013709789 -0.6615176701  
C 0.108024509 -0.3351382036 -0.0308972297  
C 0.1102312836 -0.5415472789 1.3213215342  
C 1.2642732567 -0.3413887208 2.0592174324  
C 2.4173973591 0.0503936443 1.4123100535  
C 2.4131400553 0.2852807066 0.0555040612  
O -1.0091822016 -0.5451338741 -0.7533408382  
C 1.2697474074 -0.479285686 3.5122872525  
C 0.2651433661 -0.1771940849 4.3094884643  
C 0.4219754663 -0.2989935129 5.7625466559  
O -0.498440991 0.4006491567 6.4164126375  
O 1.1531218126 0.2983074942 -2.0027105427  
O 1.2665380047 -0.9396798618 6.3257540239  
H 2.1942614313 -0.8044793434 3.977148101  
H -0.6568678579 0.2569341068 3.9491168491  
H -0.2920866308 0.3864098852 7.360799395  
H 1.7392722693 0.9962759521 -2.3106956577  
H -0.8802565111 -0.1680083512 -1.6332501846  
H 3.3078524687 0.6309111703 -0.4454463025

H 3.3203074665 0.2223066919 1.9816769535  
H -0.8109305947 -0.8443188694 1.7988590115

y+ 0.010

C 1.2752969447 0.0134522686 -0.6662514297  
C 0.0668441977 0.1884711687 -0.0137821074  
C 0.0404100309 0.2833097858 1.3519069934  
C 1.2146981736 0.2289883888 2.0811071321  
C 2.4159816779 0.1001680674 1.4150245372  
C 2.4452748988 -0.0203241224 0.0440222149  
O -1.0740278618 0.2561188056 -0.7233547336  
C 1.2054619694 0.2469689092 3.5414046098  
C 0.2773057547 -0.2919828316 4.3041427235  
C 0.4240741389 -0.2614354113 5.7651511482  
O -0.3692924986 -1.1447883988 6.3539476539  
O 1.2031334539 -0.0915488205 -2.0238089225  
O 1.1643935768 0.4592387938 6.3766802422  
H 2.0606957683 0.6918430028 4.0385556724  
H -0.5609778027 -0.8464402627 3.9059206414  
H -0.1768797746 -1.1691270511 7.3013460003  
H 1.8408426566 -0.7267605721 -2.3629148975  
H -0.891129024 -0.0236166243 -1.6294394285  
H 3.3831700193 -0.1606638261 -0.4770226028  
H 3.3371516773 0.0430717966 1.9782274437  
H -0.9173169771 0.3787289335 1.8437211088

y- 0.002

C 1.2573436956 0.07362571 -0.6834870305  
C 0.0639110544 -0.157761324 -0.0144248167  
C 0.0613204095 -0.2639540897 1.3463081172  
C 1.2413690892 -0.1477974757 2.065863617  
C 2.4199104322 0.0661604578 1.3845852887  
C 2.4294757548 0.182353333 0.0115512597  
O -1.0809705943 -0.2767825944 -0.7103956398  
C 1.2762627638 -0.2289324153 3.5189566241  
C 0.2467549439 -0.1998084589 4.3426782393  
C 0.4753331144 -0.2774178026 5.786474465  
O -0.6592189747 -0.1513574861 6.481620014  
O 1.1518266673 0.16630136 -2.0324934692  
O 1.5319585339 -0.4328635948 6.3268920319  
H 2.2589089387 -0.302353033 3.9724761264  
H -0.7769444017 -0.0931797854 4.0160000717  
H -0.4282444482 -0.1839408271 7.4196558338  
H 1.9798790447 0.4352704318 -2.4371838527

H -0.9024124592 -0.1268778576 -1.646163522  
H 3.3565263452 0.3599789214 -0.5184341609  
H 3.3456257941 0.1561201648 1.9355022893  
H -0.8835047038 -0.443111634 1.8386025134

y+ 0.002

C 1.2610254528 0.0319132577 -0.6852583014  
C 0.0501005737 0.0026365722 -0.0085875463  
C 0.0384488715 0.0001050456 1.3564121881  
C 1.225503098 0.0316446568 2.0728660487  
C 2.4187793974 0.0767371354 1.3851551982  
C 2.4389563494 0.0716062119 0.0073362604  
O -1.1029240417 -0.0221146362 -0.700340637  
C 1.2557053473 0.0032343775 3.5282419215  
C 0.2528004791 -0.2690536883 4.339874725  
C 0.4749016966 -0.2670342175 5.7872108323  
O -0.6152612759 -0.642192528 6.4618368093  
O 1.1647770962 0.0283379121 -2.03852174  
O 1.4930404736 0.0262157658 6.344277957  
H 2.2136628723 0.2103846311 3.9930575411  
H -0.7392675221 -0.5256275685 3.9991685502  
H -0.3892033642 -0.6440386983 7.4016905686  
H 2.0239173858 -0.0679075331 -2.4559228296  
H -0.9089003393 -0.0681751256 -1.6438049776  
H 3.379187601 0.0975193409 -0.5286005867  
H 3.3497304475 0.1038412233 1.9339273718  
H -0.9198695992 -0.0243601349 1.8545646462

y- 0.004

C 1.256526523 0.0827451334 -0.6778460342  
C 0.0746447584 -0.2162879092 -0.0165833379  
C 0.0760888912 -0.3559075151 1.3418659004  
C 1.2506769652 -0.2116918921 2.0638584364  
C 2.4214484542 0.0597621992 1.3892509162  
C 2.424808048 0.2154664938 0.0204187462  
O -1.0641610186 -0.3660456282 -0.7172660668  
C 1.2805855995 -0.3107945745 3.5166514773  
C 0.2535590071 -0.1874566864 4.3343441465  
C 0.4632824164 -0.28423974 5.7801700274  
O -0.6373924726 0.0305555321 6.4675685403  
O 1.1477872143 0.2077805668 -2.0249669168  
O 1.4809954017 -0.6010692281 6.3258626042  
H 2.2519168573 -0.4710640801 3.9721534858  
H -0.7489226579 0.0342450259 3.9989226629

H -0.4141840873 -0.0012724663 7.4075273263  
H 1.9209812913 0.6299115509 -2.4075567095  
H -0.899242776 -0.1400631251 -1.6405153147  
H 3.3431610453 0.4456722843 -0.5042174206  
H 3.3428634726 0.1738785432 1.9429960478  
H -0.8603119329 -0.5804524846 1.8319454826

y+ 0.004

C 1.2622053535 0.0244273005 -0.6805845696  
C 0.0508617751 0.0627835811 -0.0068670111  
C 0.037056782 0.093016036 1.3587575588  
C 1.2231283666 0.0960630464 2.0757691232  
C 2.4189650388 0.0840585678 1.3905412448  
C 2.4402218755 0.0400665702 0.0138052377  
O -1.101279103 0.0691799088 -0.7006385555  
C 1.2452444413 0.0835967197 3.5324286588  
C 0.2616040626 -0.2808387705 4.3306832968  
C 0.4629294497 -0.2634048274 5.7817355227  
O -0.5622614027 -0.8134076107 6.4341826266  
O 1.1698337755 -0.0108005701 -2.0351523646  
O 1.4172540269 0.178744171 6.354531234  
H 2.176899086 0.3738292709 4.0061018672  
H -0.6903496559 -0.6450693657 3.9730910739  
H -0.3459909973 -0.8169484645 7.3763916119  
H 1.9977766057 -0.2795320849 -2.4404945523  
H -0.9085317981 -0.055389647 -1.6375288705  
H 3.381019943 0.0135810865 -0.5209023826  
H 3.3495053333 0.0864306301 1.9407816425  
H -0.9209819584 0.1132864518 1.8579516075

y- 0.006

C 1.2571963172 0.0900856604 -0.672068853  
C 0.0858446106 -0.2631261771 -0.0201798853  
C 0.089192206 -0.4290298833 1.3361245232  
C 1.2574164148 -0.2625534493 2.0621966541  
C 2.4214391344 0.0557626362 1.3959165865  
C 2.4205520314 0.2428300927 0.0312936924  
O -1.0461688609 -0.4367883616 -0.727143239  
C 1.2801159656 -0.3768465702 3.5149517094  
C 0.2590151861 -0.1813591887 4.3254442325  
C 0.4493453119 -0.2908744604 5.7737317884  
O -0.5992186483 0.178019626 6.4507700617  
O 1.1471491353 0.2422443304 -2.0172827271  
O 1.4143337136 -0.7384064648 6.3254021711

H 2.2365293207 -0.604157378 3.973417503  
H -0.7171890133 0.1275638636 3.9806776497  
H -0.3829721039 0.1503542512 7.3925160189  
H 1.8593674482 0.778633546 -2.3754387141  
H -0.8942642159 -0.1505281251 -1.636199454  
H 3.3305308401 0.5171762444 -0.4864162875  
H 3.3374439041 0.1912352871 1.9538999864  
H -0.8405476977 -0.6865634796 1.8229705829

y+ 0.006

C 1.2652783683 0.0200883384 -0.6756172648  
C 0.0546015223 0.1120664004 -0.0074916174  
C 0.0377118333 0.1678132964 1.3583943332  
C 1.2209438901 0.1485544908 2.0780054579  
C 2.4187705416 0.0908019913 1.3977544423  
C 2.4417228106 0.0164702956 0.0227162289  
O -1.0947096476 0.1428083998 -0.7052745236  
C 1.2332399508 0.1482377427 3.5359526526  
C 0.2685250785 -0.2866002058 4.3211079212  
C 0.4497102716 -0.261627759 5.7759289142  
O -0.5018965374 -0.9471373743 6.4058207565  
O 1.1783240741 -0.0416573013 -2.0313462524  
O 1.3344575823 0.2937616039 6.3633261377  
H 2.1384248983 0.5011977512 4.0182385831  
H -0.6434751833 -0.7298877682 3.9480643393  
H -0.294598772 -0.9570454884 7.350074412  
H 1.9536575809 -0.4570316988 -2.4174561706  
H -0.9050042186 -0.0452811582 -1.6325207492  
H 3.3819479194 -0.0532165102 -0.5088558124  
H 3.3473024867 0.0715413797 1.9511618377  
H -0.9198234501 0.219815574 1.8566003738

y- 0.008

C 1.2592612373 0.0957050595 -0.6666934155  
C 0.0970180618 -0.3015991304 -0.0251296585  
C 0.100371096 -0.4889859526 1.3291432575  
C 1.2617828664 -0.3048537622 2.0606392183  
C 2.4202184649 0.0521554883 1.4037062727  
C 2.4170555369 0.2646839809 0.0430551375  
O -1.0276754355 -0.4947610446 -0.7394877065  
C 1.2761770627 -0.4315986689 3.5135279815  
C 0.2626604537 -0.1788455413 4.3171431084  
C 0.4355095632 -0.2957423343 5.7678964681  
O -0.5523192724 0.2981093209 6.4334374447



O 1.1496463539 0.2714286683 -2.0100027445  
O 1.3423417729 -0.8478158912 6.3255751879  
H 2.2169460457 -0.711481699 3.9752410863  
H -0.6866605276 0.1980866785 3.9642267034  
H -0.3414589548 0.2772190686 7.3766222838  
H 1.7969822688 0.8998363427 -2.3422867961  
H -0.8875251057 -0.1593356399 -1.6339564226  
H 3.3193251112 0.5762807778 -0.466784032  
H 3.3300492908 0.2063072716 1.9670151535  
H -0.8245948902 -0.7711209925 1.8116954721

y+ 0.008

C 1.2700300515 0.0169736268 -0.6707891644  
C 0.0602836799 0.1530462383 -0.0100999501  
C 0.0389425094 0.2297620998 1.3558360713  
C 1.2180492898 0.1921050038 2.0797188472  
C 2.4177755174 0.0967089013 1.4061449113  
C 2.4436394923 -0.0023731105 0.0330760637  
O -1.0850196587 0.2032886103 -0.7134133123  
C 1.2197441106 0.2015404694 3.5389069296  
C 0.27330648 -0.2894442112 4.3122876626  
C 0.4366436272 -0.2609840364 5.7703849997  
O -0.4374954697 -1.0547404515 6.3790318084  
O 1.1901883919 -0.0675092794 -2.0276451369  
O 1.2502191068 0.3843519781 6.370568527  
H 2.0997510658 0.603893604 4.0290120459  
H -0.6010939778 -0.7935810404 3.9258581602  
H -0.2372712184 -1.0728306225 7.3248004814  
H 1.8985147916 -0.6063539519 -2.3905923946  
H -0.8984446095 -0.0347344158 -1.630191127  
H 3.3828915199 -0.1090011601 -0.4937573264  
H 3.343010509 0.0580705525 1.9641359287  
H -0.9185542088 0.3054831952 1.8513099745

Caffeic Acid (Radical)

z- 0.010

C 1.2502682431 0.0544623683 -0.7363344892  
C 0.0063270512 -0.0835036444 -0.0002377338  
C -0.0306840646 -0.1390362224 1.3500384056  
C 1.1642023377 -0.0622608206 2.0763246375  
C 2.3912365863 0.0755757334 1.3743017673  
C 2.4484368044 0.1331831474 0.0326509152  
O -1.0753171867 -0.1504920225 -0.7716607922  
C 1.2279992814 -0.1171185174 3.5035357341

C 0.2101944442 -0.2369085433 4.3527964501  
C 0.5114771939 -0.276936325 5.8056610544  
O -0.58652289 -0.3824981737 6.5301078668  
O 1.1873813512 0.0936188387 -1.9734356848  
O 1.6183625615 -0.220045425 6.2406208213  
H 2.2113887717 -0.0556420236 3.9569616053  
H -0.8272965545 -0.3064294313 4.0581970174  
H -0.3613119091 -0.4022976927 7.4748893501  
H -0.7252978108 -0.0824231009 -1.6796162853  
H 3.3840862586 0.2390728001 -0.4971157401  
H 3.2976995146 0.1348261927 1.9614596936  
H -0.980977984 -0.2426281381 1.8526284067

z+ 0.010

C 1.2463360313 0.0552603381 -0.740240442  
C -0.0025553815 -0.0824760105 0.0211913871  
C -0.0002435977 -0.1357815004 1.3794362274  
C 1.2078949718 -0.0598117152 2.0718737135  
C 2.4334625013 0.0719128726 1.3548315871  
C 2.473046916 0.1277328864 0.0164250709  
O -1.0951831505 -0.146734582 -0.6895703952  
C 1.2755172503 -0.1083435485 3.4960964346  
C 0.2499020229 -0.2339264507 4.3481588702  
C 0.4752426069 -0.2678127176 5.7731629616  
O -0.6716615209 -0.4083197468 6.473857355  
O 1.1693666665 0.1004883213 -1.9485436263  
O 1.5216090849 -0.1875495507 6.3653813241  
H 2.2650858347 -0.0362550896 3.9339575984  
H -0.7744769742 -0.3174586306 4.0202591117  
H -0.4020112182 -0.4239461538 7.3990200943  
H -0.8482208101 -0.0899616142 -1.6357926995  
H 3.3916075646 0.226207964 -0.5443757706  
H 3.3518654947 0.1260507643 1.9243833345  
H -0.9449322928 -0.2367568362 1.8922608632

z- 0.002

C 1.2449765061 0.0549680121 -0.7365526919  
C 0.0039680533 -0.0826881733 0.0126602841  
C -0.0107671584 -0.1378413157 1.367823794  
C 1.190277289 -0.0615354269 2.0717744082  
C 2.412477801 0.0731899205 1.3635437356  
C 2.4572594801 0.1304265456 0.0220410204  
O -1.0872800631 -0.1482689189 -0.7268058797  
C 1.2546810809 -0.1137414908 3.506406046

C 0.2328349029 -0.2362222324 4.3451535258  
C 0.4931300534 -0.2722120056 5.7915350871  
O -0.6295330644 -0.3959292077 6.4958350487  
O 1.1724736479 0.0961756145 -1.9616640253  
O 1.572537176 -0.2004495131 6.2976381317  
H 2.2396440572 -0.0464510258 3.9546761586  
H -0.7975892851 -0.3125161076 4.0316723253  
H -0.3964723575 -0.4128216545 7.4349665579  
H -0.7841236003 -0.0844823957 -1.6527041006  
H 3.3838140458 0.2330093224 -0.5237590745  
H 3.3261500216 0.1300851851 1.9396199381  
H -0.9568065865 -0.2401761322 1.8779127105

z+ 0.002

C 1.2440617786 0.0551285714 -0.7371939052  
C 0.0023144324 -0.0825301905 0.0168365545  
C -0.0044106168 -0.1372357959 1.3734607152  
C 1.1993934755 -0.0610261647 2.0708250116  
C 2.4208885048 0.072570078 1.360028355  
C 2.4618341714 0.1295127309 0.0187650841  
O -1.0913963648 -0.1477393402 -0.7104223889  
C 1.2641319171 -0.1121073683 3.5049754037  
C 0.2407009939 -0.2355941152 4.3441359201  
C 0.4860309513 -0.2705849113 5.7852770859  
O -0.6462503368 -0.4004070873 6.4844578906  
O 1.1689559605 0.0978113709 -1.9568433924  
O 1.5532123567 -0.1951213781 6.3221477359  
H 2.2502579733 -0.0429516784 3.9504612167  
H -0.7870984003 -0.3143494697 4.0239992691  
H -0.4049030464 -0.4166435969 7.4199640119  
H -0.8087392378 -0.0863614853 -1.643713642  
H 3.3849356332 0.2307884932 -0.5331984439  
H 3.3371147738 0.1285484346 1.9323134513  
H -0.9493829196 -0.2391880971 1.8854970668

z- 0.004

C 1.2458918504 0.0540864689 -0.7365711104  
C 0.004581025 -0.0827896912 0.0100174098  
C -0.0147893006 -0.1379138797 1.3642737696  
C 1.1848389401 -0.0617878448 2.0725401191  
C 2.4078803432 0.0734482953 1.3656042348  
C 2.4551452631 0.1306860885 0.0240550452  
O -1.0848539944 -0.1484977315 -0.7363335996  
C 1.2490816185 -0.11438915 3.5064520243

C 0.2281211635 -0.2361676685 4.346303417  
C 0.4971178961 -0.272594912 5.7950674044  
O -0.6200536557 -0.3938360451 6.5029449243  
O 1.1750400162 0.096020949 -1.9643987152  
O 1.5830397186 -0.2035779978 6.2846700961  
H 2.2336035054 -0.0481396657 3.9559850249  
H -0.8038297494 -0.3111140141 4.0366919179  
H -0.3904474386 -0.4116394953 7.4437639032  
H -0.7707419201 -0.0842047423 -1.6581927968  
H 3.3836662337 0.2341555624 -0.5182574398  
H 3.3199890478 0.1309624096 1.9440907628  
H -0.9616285625 -0.2401879357 1.8730666019

z+ 0.004

C 1.2440664889 0.0553845772 -0.7375891249  
C 0.0013408583 -0.0824885519 0.0184254408  
C -0.0022473935 -0.1369456492 1.3755811874  
C 1.2028080169 -0.0607182322 2.0706932473  
C 2.4245268982 0.0723823041 1.3586464667  
C 2.4642702179 0.1291396103 0.017699811  
O -1.0929285554 -0.1475550427 -0.7037129838  
C 1.2678846407 -0.1112763894 3.5035438191  
C 0.2438006845 -0.2352493692 4.3442973606  
C 0.4829561813 -0.2698863166 5.7821667888  
O -0.6535165955 -0.4023250582 6.4801704895  
O 1.1681907727 0.0983959024 -1.9545696043  
O 1.5444696484 -0.1931130904 6.3334933754  
H 2.2547176585 -0.0413574061 3.9474362641  
H -0.7829211851 -0.3151194346 4.0215582708  
H -0.4066302504 -0.4183310892 7.413528559  
H -0.8198708607 -0.0872554886 -1.6404258571  
H 3.3859424482 0.22971708 -0.5368909052  
H 3.3417129539 0.1278931181 1.9295530713  
H -0.946920628 -0.2387724738 1.8881673234

z- 0.006

C 1.2470180882 0.0546567899 -0.7363350799  
C 0.0052318672 -0.0828990018 0.0070470424  
C -0.0195280472 -0.1382389809 1.3601546171  
C 1.1785513716 -0.061850522 2.0735835848  
C 2.4026955029 0.0740595342 1.3681255666  
C 2.4529233681 0.1313763236 0.0266019583  
O -1.0820009224 -0.1489326703 -0.7469712128  
C 1.2427827412 -0.1151740848 3.5059604515

C 0.2228493041 -0.2365950029 4.3479480141  
C 0.5015379987 -0.2740137294 5.7983006789  
O -0.609824609 -0.3909686025 6.5109495637  
O 1.1785761858 0.0943770395 -1.9671690432  
O 1.5940490437 -0.2074040587 6.2708817944  
H 2.2268768561 -0.0501289079 3.9567210767  
H -0.8107511682 -0.3101413537 4.0428013119  
H -0.3822113897 -0.4089640138 7.4531669972  
H -0.7565405439 -0.0829289364 -1.6645169715  
H 3.3836681054 0.2352559696 -0.5118524997  
H 3.3130908682 0.1319472694 1.9492240052  
H -0.9673426207 -0.2409140613 1.8671511444

z+ 0.006

C 1.2444003068 0.0556530664 -0.7381935303  
C 0.0001948266 -0.0824813364 0.0196687728  
C -0.0007495078 -0.1366791497 1.3772823622  
C 1.2054632548 -0.0604304822 2.0707826301  
C 2.4278640486 0.0722517982 1.3573959424  
C 2.4669037762 0.1288235221 0.016968638  
O -1.0941096336 -0.1474053742 -0.6979425824  
C 1.2710418291 -0.1104797519 3.5016237219  
C 0.2463995262 -0.2349019424 4.3449660055  
C 0.4801490947 -0.2692597388 5.7791323761  
O -0.6601896588 -0.4040041105 6.4768807043  
O 1.1680353756 0.0990245992 -1.9524382074  
O 1.5363033315 -0.1914916549 6.3444391367  
H 2.2587080217 -0.0399113528 3.9437042064  
H -0.7794112924 -0.3158060709 4.0200740033  
H -0.4068794251 -0.4198400736 7.4078534123  
H -0.8302997125 -0.0881921597 -1.6379392819  
H 3.3873189565 0.2287472732 -0.5399960157  
H 3.3457753321 0.1273091456 1.9273228104  
H -0.9452664501 -0.2384072067 1.8901878953

z- 0.008

C 1.2484609206 0.054830766 -0.7362619029  
C 0.0057821776 -0.0834493555 0.0036566754  
C -0.024771017 -0.1392112207 1.3554299358  
C 1.1717618025 -0.0623994392 2.0748407227  
C 2.3971916568 0.0749766245 1.3710317604  
C 2.4506671642 0.1328360293 0.0294727136  
O -1.0787962927 -0.1502414319 -0.7587425328  
C 1.2358227988 -0.1167566499 3.5049878861

C 0.2168542107 -0.2366664129 4.3500843369  
C 0.5063048917 -0.275656511 5.8018156657  
O -0.5988482996 -0.3851648337 6.5199815062  
O 1.1825199381 0.094826072 -1.9701222192  
O 1.6060451836 -0.2155122418 6.2560409309  
H 2.2196000451 -0.0542207047 3.9570594668  
H -0.8186971951 -0.3073250014 4.0499818696  
H -0.3726703627 -0.4043379773 7.4634887776  
H -0.7413426087 -0.0830527484 -1.6716612383  
H 3.3837097638 0.2382221281 -0.5048073625  
H 3.3056891347 0.1336913663 1.9550342986  
H -0.9736319122 -0.2428694577 1.8604617095

z+ 0.008

C 1.245254285 0.0547283389 -0.7390523774  
C -0.0010786521 -0.0824098746 0.0205842772  
C -0.0001547098 -0.1360913197 1.3785106313  
C 1.2070973766 -0.0602245232 2.0711889374  
C 2.4307795585 0.0719733412 1.3561903464  
C 2.469804436 0.1282025534 0.016597279  
O -1.0948751813 -0.1469554048 -0.6933324072  
C 1.2735118372 -0.1095197136 3.499137276  
C 0.248374535 -0.2344168289 4.3462622369  
C 0.4776357582 -0.2684706642 5.7761309549  
O -0.6660944075 -0.4061768507 6.4747863893  
O 1.1684345381 0.1005055125 -1.9503696699  
O 1.5287558671 -0.1894162614 6.354960759  
H 2.262081039 -0.0382279944 3.9392164111  
H -0.77666215 -0.3165610322 4.0197227175  
H -0.4051507899 -0.421917314 7.4030228717  
H -0.8395796038 -0.089639512 -1.6364938339  
H 3.3891659815 0.2277137502 -0.5424169971  
H 3.3490727264 0.1267068393 1.9256780524  
H -0.9447204444 -0.2372840417 1.8914491453

Zero Field

C 1.2443641112 0.0548477485 -0.7369127476  
C 0.0031552184 -0.0825970688 0.0149302124  
C -0.0072181474 -0.1375208031 1.3709073511  
C 1.1952554248 -0.0613356538 2.0711691981  
C 2.4169251585 0.0728096955 1.3616219266  
C 2.459528287 0.1299183257 0.0201937993  
O -1.0895265499 -0.1479513802 -0.7180607617  
C 1.2597601673 -0.1129513779 3.5059280513

C 0.2370695626 -0.2359230712 4.344392676  
C 0.4894086518 -0.2713544853 5.7884428672  
O -0.6382780119 -0.3982871978 6.4896571279  
O 1.1703020663 0.0972608277 -1.9592128338  
O 1.5625596832 -0.1974980052 6.3102547104  
H 2.2452883441 -0.044664455 3.9528375945  
H -0.791972899 -0.3134895614 4.0273198271  
H -0.4017064546 -0.4148177684 7.427127441  
H -0.796834063 -0.0855279116 -1.6477454596  
H 3.3842317907 0.2319300493 -0.5288839593  
H 3.3319778532 0.1292764532 1.9356462755  
H -0.952638193 -0.2396053602 1.8821597037

x- 0.010

C 1.2273488346 0.042023249 -0.7284539114  
C -0.004900827 -0.0723007905 0.0460145242  
C 0.0031178133 -0.1156892276 1.3932722802  
C 1.2261974356 -0.0490263193 2.0759934888  
C 2.4368532899 0.0621134304 1.3471953064  
C 2.4587685861 0.1044961881 0.0011173753  
O -1.1047352486 -0.1230145021 -0.6973955937  
C 1.2918883463 -0.0873992943 3.509720262  
C 0.2567916796 -0.2405768169 4.3327186381  
C 0.4668680533 -0.2564409587 5.7789565763  
O -0.6806417002 -0.4645189848 6.4606264562  
O 1.1057115046 0.0788060273 -1.9475655565  
O 1.5031383256 -0.1064728718 6.3429632242  
H 2.2722353328 0.0138988291 3.9630951844  
H -0.758310938 -0.3668034429 3.9887529583  
H -0.4276103474 -0.4747497319 7.3941501534  
H -0.7634857041 -0.0712255356 -1.6161904754  
H 3.3793731941 0.1856069551 -0.5596794306  
H 3.3652744927 0.1102186425 1.9008304994  
H -0.9322301232 -0.1964258449 1.9256510402

x+ 0.010

C 1.2613598752 0.0547443518 -0.7471597664  
C 0.0113073987 -0.0830222538 -0.0132537867  
C -0.0129515375 -0.1392537943 1.3531628953  
C 1.1712621489 -0.0622424024 2.0669128782  
C 2.4022815815 0.0786645536 1.3728614992  
C 2.4617692451 0.1369031349 0.0338510686  
O -1.0807503103 -0.1539039328 -0.7269132002  
C 1.2347908654 -0.1195309474 3.5048793744

C 0.2257100594 -0.2374122063 4.355489992  
C 0.5083906638 -0.2797225949 5.7982430882  
O -0.6008414735 -0.3766853271 6.5062977931  
O 1.2327990326 0.0914458044 -1.9724648407  
O 1.6045241407 -0.2340890133 6.2906137306  
H 2.2236779261 -0.0592319019 3.9457602353  
H -0.8119901103 -0.3023880461 4.0615753407  
H -0.3917894543 -0.3956398595 7.4501726868  
H -0.8472207685 -0.0903944104 -1.670156837  
H 3.3912712539 0.2465405499 -0.5064360448  
H 3.3073570576 0.1412312982 1.9630344107  
H -0.9693055943 -0.2434940025 1.8453024827

x- 0.002

C 1.2408199859 0.0549402406 -0.7349565298  
C 0.0016773765 -0.0823548924 0.0209232629  
C -0.0052881399 -0.1370665407 1.3749811167  
C 1.2010433794 -0.0610268957 2.0720780338  
C 2.4204878293 0.0716166326 1.3589793533  
C 2.4591080605 0.1283083583 0.0168474079  
O -1.0919627509 -0.1464416958 -0.7147637586  
C 1.2659046609 -0.1113623357 3.5063923584  
C 0.2403092309 -0.2356768271 4.3420971629  
C 0.4852561383 -0.269376942 5.7864267491  
O -0.6471122279 -0.4032177569 6.4849391844  
O 1.1574062595 0.0975391611 -1.9566708287  
O 1.5528851466 -0.1892105773 6.3155712441  
H 2.2508066752 -0.041135004 3.9544985956  
H -0.7867850977 -0.3164600662 4.0199568174  
H -0.4062153854 -0.4195204659 7.4213476059  
H -0.7889528706 -0.0839522952 -1.6419721725  
H 3.3828227039 0.2286217025 -0.5342991638  
H 3.3379373962 0.1269333304 1.9292523656  
H -0.9484963709 -0.2386381305 1.8901441954

x+ 0.002

C 1.2478776054 0.0544162876 -0.7388792668  
C 0.0047060859 -0.0827660571 0.0090510901  
C -0.0088898405 -0.137760156 1.3670151071  
C 1.1897986999 -0.0615154972 2.0702943126  
C 2.4135784596 0.0739303207 1.3641256384  
C 2.4599686793 0.1312507345 0.0233098875  
O -1.0873299537 -0.149282002 -0.720845716  
C 1.2539979057 -0.1141959915 3.5055612344



C 0.2341443389 -0.2358651526 4.3466934781  
C 0.4933883299 -0.2727466538 5.7904442704  
O -0.6298799217 -0.3941603985 6.493886511  
O 1.1830609468 0.0966270112 -1.9617869312  
O 1.5717319417 -0.2052064503 6.3054251622  
H 2.2401338873 -0.0476303862 3.9513197859  
H -0.7967451379 -0.3105165504 4.0345034944  
H -0.397899658 -0.4113336234 7.4324549319  
H -0.805493496 -0.087036471 -1.6531367342  
H 3.3856696613 0.2348449317 -0.5237621835  
H 3.3263643213 0.1316000382 1.9417218551  
H -0.9565308552 -0.240134934 1.8743770726

x- 0.004

C 1.2375731714 0.0521108112 -0.7331998303  
C 0.0000307993 -0.0803966716 0.0270534317  
C -0.0035574151 -0.132700934 1.3792827317  
C 1.2068851604 -0.0585768638 2.0730869535  
C 2.4242601936 0.0694638455 1.3562490022  
C 2.4590022395 0.123214788 0.0132314124  
O -1.0947721945 -0.1415907752 -0.7111983555  
C 1.27193336 -0.1062235736 3.5070514723  
C 0.2438243663 -0.2365420577 4.3397914365  
C 0.4809215897 -0.26647439 5.7844651576  
O -0.6553305147 -0.416519509 6.4796011081  
O 1.1446618423 0.0942868183 -1.9542740215  
O 1.5419396752 -0.1713139525 6.3215393162  
H 2.2557786568 -0.0293261154 3.9565631993  
H -0.7807317192 -0.3267474459 4.0124717856  
H -0.4105793648 -0.4312171996 7.4150772292  
H -0.7816538866 -0.0814739322 -1.6361690702  
H 3.3819511099 0.2194388018 -0.5401235931  
H 3.3442687435 0.1231649036 1.9225828918  
H -0.9447538131 -0.2300575479 1.8986907425

x+ 0.004

C 1.2512413993 0.0550880305 -0.7406572371  
C 0.0063318452 -0.0828896221 0.0033786665  
C -0.010411496 -0.1382206045 1.3632865855  
C 1.1845583742 -0.0616149503 2.0694682346  
C 2.4102972693 0.0752041077 1.3665723973  
C 2.4603195088 0.1328199938 0.0263197739  
O -1.0853110534 -0.1506472596 -0.7232010914  
C 1.2486001334 -0.1155710001 3.505208505

C 0.2315497684 -0.2362996165 4.3489224566  
C 0.4973797947 -0.2748094189 5.7921964572  
O -0.6219425261 -0.3896375741 6.4976070402  
O 1.1957385583 0.0949644722 -1.9642806163  
O 1.5805096738 -0.2127453014 6.3009272187  
H 2.2353564801 -0.0506731412 3.9497915142  
H -0.8011110497 -0.3082599063 4.0415173853  
H -0.3946826284 -0.4068864386 7.437302289  
H -0.8145765506 -0.0876866047 -1.658085977  
H 3.3870698021 0.2376878692 -0.5187797632  
H 3.3209642252 0.1339144437 1.9475353455  
H -0.9602295285 -0.2412184789 1.8667438154

x- 0.006

C 1.2341620706 0.0498668469 -0.7315530355  
C -0.0015710163 -0.0786041997 0.0332332589  
C -0.0014376175 -0.128900971 1.383720749  
C 1.213105775 -0.0564278681 2.074024535  
C 2.4282540198 0.0674634886 1.3533444959  
C 2.4588401957 0.1186183856 0.0094080221  
O -1.0977889191 -0.1370931651 -0.7070703273  
C 1.2784046062 -0.1016046818 3.5077894356  
C 0.2477375405 -0.2373295399 4.3374735428  
C 0.4764821555 -0.2636697734 5.7826172204  
O -0.6640188391 -0.4285800864 6.473898149  
O 1.131728558 0.0911924093 -1.9519673993  
O 1.5304389388 -0.154510201 6.3280705462  
H 2.2613215285 -0.0187210494 3.9585509178  
H -0.7742085797 -0.3363669262 4.0048226359  
H -0.41605083 -0.4421262717 7.4086027449  
H -0.7750184178 -0.0788015913 -1.6298429252  
H 3.3809467262 0.2110484024 -0.5462897325  
H 3.350928178 0.1196079509 1.9156153175  
H -0.9406040734 -0.2225421586 1.9073248487

x+ 0.006

C 1.2546002048 0.0553217926 -0.742689999  
C 0.0080503358 -0.083266079 -0.0022895988  
C -0.0114363877 -0.1392823338 1.3597655472  
C 1.1797884381 -0.0622828541 2.0686068169  
C 2.4074035057 0.0765619709 1.3688390376  
C 2.4607205015 0.1348949591 0.029105397  
O -1.0835349863 -0.1523694403 -0.7249054004  
C 1.2437022114 -0.1176740136 3.5050289144

C 0.2293038925 -0.2365830101 4.3511460366  
C 0.501157075 -0.276714746 5.7941645799  
O -0.6146453383 -0.3832645696 6.5009351053  
O 1.2081703026 0.0948481574 -1.9669089338  
O 1.5890300819 -0.2221838975 6.2969213797  
H 2.2312231563 -0.0552832224 3.9483212697  
H -0.8051667717 -0.3050338374 4.0483841204  
H -0.3928640818 -0.4014278397 7.441899402  
H -0.8247187093 -0.0890314886 -1.6625378781  
H 3.3882936715 0.2419359883 -0.5143528787  
H 3.3160341429 0.1366635057 1.9530757268  
H -0.9634592449 -0.2433100418 1.8592643555

x- 0.008

C 1.2307535811 0.0466594563 -0.7299767407  
C -0.0032045637 -0.0760364309 0.0395413386  
C 0.000800659 -0.1235061745 1.3883680849  
C 1.2195480961 -0.0533951086 2.0749869366  
C 2.4324474842 0.0650795376 1.3503240919  
C 2.4587560497 0.1126130396 0.0053707188  
O -1.1010949977 -0.1311415046 -0.702482901  
C 1.2850755878 -0.0955645253 3.5086670867  
C 0.2520358472 -0.2385942585 4.3351274932  
C 0.4718354974 -0.2603952168 5.7807884818  
O -0.6725716488 -0.444023209 6.4676183246  
O 1.118740606 0.0863160484 -1.9497327859  
O 1.517719612 -0.1335644902 6.3351900412  
H 2.2668780295 -0.0048473868 3.9607031225  
H -0.7668577878 -0.3491946546 3.9969585941  
H -0.4218330183 -0.4561354399 7.4016681212  
H -0.7689609705 -0.0754759951 -1.6231908804  
H 3.380074108 0.2001894264 -0.5528020853  
H 3.3579211886 0.1154141123 1.9083672178  
H -0.9364113599 -0.2118782258 1.9162787394

x+ 0.008

C 1.2580027894 0.0550096676 -0.7448860177  
C 0.0096410825 -0.0830842478 -0.0078250402  
C -0.0123870484 -0.1390926106 1.3563646169  
C 1.1753020296 -0.062137488 2.0677600718  
C 2.4046914592 0.0775791396 1.3709315994  
C 2.4612317296 0.1357885263 0.031589346  
O -1.0820202771 -0.1531107367 -0.7262129196  
C 1.2389992132 -0.1184657821 3.5049162948

C 0.2273269576 -0.2370056405 4.3533581867  
C 0.5048639949 -0.2782305737 5.7961910938  
O -0.607452814 -0.3803047805 6.5038277917  
O 1.2205851778 0.093075339 -1.9696577393  
O 1.5969798095 -0.2278923994 6.2935011001  
H 2.2271794493 -0.0570235961 3.9470103483  
H -0.808780363 -0.3038118705 4.055132002  
H -0.3917420304 -0.3987073737 7.4461959548  
H -0.8354637524 -0.0898048541 -1.66661315  
H 3.3898072628 0.2440037971 -0.5101975721  
H 3.3114753441 0.1388481474 1.9582221119  
H -0.9665880142 -0.2431136634 1.8521649206

y- 0.010

C 1.251592638 0.0415420492 -0.7353535339  
C 0.0033159127 -0.0289351935 0.0114270815  
C -0.0139306187 -0.0639956938 1.3693977199  
C 1.1876478535 -0.045975905 2.0719586716  
C 2.4179742632 -0.0310459697 1.3655999021  
C 2.4670302102 -0.0066112279 0.0231373641  
O -1.092375484 -0.0083981684 -0.7207339549  
C 1.2365785057 -0.0132535508 3.5102880888  
C 0.2333443202 -0.2584583278 4.3428726695  
C 0.4527695221 -0.1489894903 5.7903402937  
O -0.5224231051 -0.7231099717 6.4829067379  
O 1.1849608958 0.1634610354 -1.9540542161  
O 1.3834830349 0.4007885742 6.3089336405  
H 2.1942741955 0.2257872489 3.9589527539  
H -0.7411329115 -0.5949151984 4.0200480749  
H -0.2875066413 -0.717098579 7.421128633  
H -0.80068857 -0.0297905834 -1.6519763624  
H 3.3976199864 -0.0257003625 -0.5253221273  
H 3.3333963703 -0.0667649433 1.9409420944  
H -0.9642783778 -0.0960167423 1.8812794689

y+ 0.010

C 1.251592638 0.0415420492 -0.735353534  
C 0.0033159127 -0.0289351935 0.0114270815  
C -0.0139306187 -0.0639956938 1.3693977199  
C 1.1876478535 -0.0459759049 2.0719586716  
C 2.4179742632 -0.0310459697 1.3655999021  
C 2.4670302103 -0.0066112279 0.0231373641  
O -1.092375484 -0.0083981684 -0.7207339549  
C 1.2365785056 -0.0132535508 3.5102880888

C 0.2333443202 -0.2584583278 4.3428726695  
C 0.4527695221 -0.1489894903 5.7903402937  
O -0.5224231051 -0.7231099717 6.4829067379  
O 1.1849608958 0.1634610353 -1.9540542161  
O 1.3834830349 0.4007885742 6.3089336405  
H 2.1942741955 0.225787249 3.9589527539  
H -0.7411329115 -0.5949151985 4.0200480749  
H -0.2875066413 -0.717098579 7.421128633  
H -0.80068857 -0.0297905834 -1.6519763624  
H 3.3976199864 -0.0257003625 -0.5253221273  
H 3.3333963703 -0.0667649432 1.9409420944  
H -0.9642783778 -0.0960167423 1.8812794688

y- 0.002

C 1.2452768489 0.0497732633 -0.736948922  
C 0.0025197428 -0.0705304022 0.0147765809  
C -0.0090534739 -0.1193953357 1.3711334272  
C 1.1939587809 -0.0559923238 2.0714190277  
C 2.4179758534 0.0517762192 1.3614494986  
C 2.4618384783 0.0996690864 0.0197031113  
O -1.0915320835 -0.1173591558 -0.7176730258  
C 1.2565013363 -0.0894281283 3.5068891582  
C 0.236998905 -0.2414545857 4.3442845319  
C 0.4862206173 -0.2448875501 5.7893865758  
O -0.6269987952 -0.4722330009 6.4872747034  
O 1.1712852046 0.10599711 -1.9589156263  
O 1.5459764947 -0.0657224285 6.3135258047  
H 2.2379274588 0.017507245 3.9552074209  
H -0.7853369224 -0.3781853065 4.0254281368  
H -0.3907726073 -0.4847020516 7.4249064336  
H -0.7979952139 -0.0730827846 -1.6480873662  
H 3.3887719615 0.1751586055 -0.5298815706  
H 3.3341275008 0.0896999337 1.9352293499  
H -0.956038087 -0.2040894095 1.8826657502

y+ 0.002

C 1.2452768489 0.0497732633 -0.736948922  
C 0.0025197428 -0.0705304022 0.0147765809  
C -0.0090534739 -0.1193953358 1.3711334272  
C 1.1939587809 -0.0559923238 2.0714190277  
C 2.4179758534 0.0517762193 1.3614494986  
C 2.4618384783 0.0996690864 0.0197031113  
O -1.0915320835 -0.1173591559 -0.7176730258  
C 1.2565013363 -0.0894281282 3.5068891582

C 0.236998905 -0.2414545857 4.3442845319  
C 0.4862206172 -0.2448875501 5.7893865758  
O -0.6269987952 -0.4722330009 6.4872747033  
O 1.1712852046 0.10599711 -1.9589156263  
O 1.5459764947 -0.0657224284 6.3135258047  
H 2.2379274588 0.0175072451 3.9552074209  
H -0.7853369223 -0.3781853065 4.0254281368  
H -0.3907726073 -0.4847020516 7.4249064335  
H -0.7979952139 -0.0730827847 -1.6480873662  
H 3.3887719615 0.1751586055 -0.5298815706  
H 3.3341275008 0.0896999337 1.9352293499  
H -0.9560380869 -0.2040894096 1.8826657503

y- 0.004

C 1.246357648 0.0458591046 -0.7368795019  
C 0.0021808341 -0.0590848488 0.0144000653  
C -0.0104794104 -0.1029914385 1.3711786277  
C 1.1927111221 -0.0518700588 2.0715784388  
C 2.4186853316 0.0307629459 1.3617306688  
C 2.4636738374 0.0707519826 0.0197397598  
O -1.0928236003 -0.0878556912 -0.7175820937  
C 1.252597462 -0.0676997409 3.507835119  
C 0.2368253455 -0.2469129053 4.3439635935  
C 0.480580052 -0.219294139 5.7900747073  
O -0.6092208437 -0.5419376332 6.4853079442  
O 1.1730752407 0.1170283212 -1.9583161255  
O 1.5181992187 0.0611760551 6.3150897888  
H 2.2289152583 0.0761635822 3.9569864095  
H -0.7760008991 -0.439871827 4.0234731114  
H -0.373622006 -0.5499211133 7.4231842085  
H -0.7990223237 -0.0609088876 -1.6484701221  
H 3.3922027052 0.1208032297 -0.5300841366  
H 3.3354366176 0.0501613301 1.9355159571  
H -0.9586195901 -0.1718392676 1.8830465803

y+ 0.004

C 1.246357648 0.0458591046 -0.7368795019  
C 0.0021808341 -0.0590848488 0.0144000653  
C -0.0104794104 -0.1029914385 1.3711786277  
C 1.1927111221 -0.0518700589 2.0715784388  
C 2.4186853316 0.0307629459 1.3617306688  
C 2.4636738374 0.0707519826 0.0197397598  
O -1.0928236003 -0.0878556912 -0.7175820937  
C 1.252597462 -0.0676997409 3.507835119

C 0.2368253455 -0.2469129053 4.3439635935  
C 0.480580052 -0.219294139 5.7900747073  
O -0.6092208437 -0.5419376332 6.4853079442  
O 1.1730752407 0.1170283212 -1.9583161255  
O 1.5181992187 0.0611760551 6.3150897888  
H 2.2289152583 0.0761635822 3.9569864095  
H -0.7760008991 -0.4398718269 4.0234731113  
H -0.3736220061 -0.5499211133 7.4231842085  
H -0.7990223237 -0.0609088876 -1.6484701221  
H 3.3922027052 0.1208032298 -0.5300841366  
H 3.3354366176 0.0501613301 1.9355159571  
H -0.95861959 -0.1718392677 1.8830465803

y- 0.006

C 1.2477898369 0.0429903621 -0.7365551272  
C 0.0022313973 -0.0482626821 0.0136434698  
C -0.011813815 -0.0882324261 1.3708327952  
C 1.1911511703 -0.0488917268 2.0717082711  
C 2.4188197632 0.0097233094 1.362599993  
C 2.4650922525 0.043136996 0.0204128434  
O -1.0933006337 -0.0592650257 -0.7182324946  
C 1.2477676598 -0.0476604221 3.5087171846  
C 0.2361268333 -0.2517878421 4.3436148804  
C 0.472822573 -0.1945270713 5.7904158517  
O -0.5850091238 -0.6078153914 6.4841708944  
O 1.1760232307 0.1300412888 -1.9573292791  
O 1.4805653864 0.1827939231 6.3145246286  
H 2.2181741752 0.1309191711 3.9582081054  
H -0.7649968313 -0.4973880937 4.0218624402  
H -0.3496261383 -0.6109951352 7.4221817745  
H -0.7996740264 -0.0489446753 -1.6493907097  
H 3.3947691459 0.0688160491 -0.5291819208  
H 3.3356070003 0.0106100953 1.9367118591  
H -0.9608678564 -0.1427417032 1.8828575401

y+ 0.006

C 1.2477898369 0.0429903622 -0.7365551272  
C 0.0022313973 -0.0482626821 0.0136434698  
C -0.0118138149 -0.088232426 1.3708327952  
C 1.1911511703 -0.0488917268 2.0717082711  
C 2.4188197632 0.0097233095 1.362599993  
C 2.4650922524 0.043136996 0.0204128433  
O -1.0933006337 -0.0592650257 -0.7182324946  
C 1.2477676598 -0.0476604221 3.5087171846

C 0.2361268333 -0.2517878421 4.3436148804  
C 0.472822573 -0.1945270713 5.7904158517  
O -0.5850091238 -0.6078153915 6.4841708944  
O 1.1760232307 0.1300412889 -1.9573292791  
O 1.4805653864 0.1827939231 6.3145246286  
H 2.2181741752 0.1309191711 3.9582081054  
H -0.7649968312 -0.4973880938 4.0218624402  
H -0.3496261383 -0.6109951353 7.4221817744  
H -0.7996740264 -0.0489446753 -1.6493907097  
H 3.3947691459 0.0688160491 -0.5291819208  
H 3.3356070003 0.0106100953 1.9367118591  
H -0.9608678563 -0.1427417032 1.8828575402

y- 0.008

C 1.2495384128 0.0414699163 -0.7360511634  
C 0.0026065978 -0.0381376231 0.0126467844  
C -0.0129594782 -0.0751248198 1.3702507568  
C 1.1894468159 -0.0468971125 2.0718314846  
C 2.4185678109 -0.010981731 1.3639254816  
C 2.4661912843 0.0171633362 0.0215831524  
O -1.0931198805 -0.0325649774 -0.7192937813  
C 1.2423336424 -0.0293611764 3.5095491536  
C 0.2349802232 -0.2557135753 4.3432310956  
C 0.4633827316 -0.1709865391 5.7904789477  
O -0.555617264 -0.6686052032 6.4833829727  
O 1.1800165772 0.1454100676 -1.9559318243  
O 1.4348817212 0.2966054636 6.3123288269  
H 2.2063852752 0.1812356707 3.9588509228  
H -0.7530563229 -0.5494712659 4.0207168217  
H -0.3204342502 -0.6670687774 7.4214973856  
H -0.8002006414 -0.0382996016 -1.6505628053  
H 3.3965306252 0.0196337673 -0.5275486706  
H 3.3348961004 -0.0285486381 1.9385774343  
H -0.9627179807 -0.117238181 1.8823100241

y+ 0.008

C 1.2495384129 0.0414699161 -0.7360511634  
C 0.0026065978 -0.038137624 0.0126467843  
C -0.0129594782 -0.0751248205 1.3702507568  
C 1.1894468159 -0.0468971124 2.0718314846  
C 2.4185678108 -0.0109817303 1.3639254816  
C 2.4661912843 0.0171633368 0.0215831524  
O -1.0931198803 -0.0325649791 -0.7192937814  
C 1.2423336423 -0.029361176 3.5095491536



C 0.2349802231 -0.2557135752 4.3432310956  
C 0.4633827315 -0.1709865386 5.7904789477  
O -0.5556172639 -0.668605203 6.4833829728  
O 1.1800165774 0.1454100672 -1.9559318243  
O 1.4348817209 0.2966054645 6.3123288269  
H 2.206385275 0.1812356715 3.9588509228  
H -0.7530563229 -0.5494712662 4.0207168217  
H -0.3204342501 -0.667068777 7.4214973856  
H -0.8002006413 -0.0382996032 -1.6505628054  
H 3.3965306253 0.0196337684 -0.5275486705  
H 3.3348961004 -0.0285486368 1.9385774344  
H -0.9627179807 -0.1172381823 1.882310024

### Caffeic Acid (Radical Cation)

z- 0.010

C 1.2699205642 0.0545469081 -0.6669247974  
C 0.0238815706 -0.0897808961 -0.0214600901  
C -0.0201101757 -0.1491119453 1.3277851113  
C 1.1694787166 -0.0699342974 2.0787173521  
C 2.4046475042 0.0720595249 1.3980151923  
C 2.45139548 0.1342561463 0.0437232833  
O -1.08610186 -0.1650042881 -0.7569596664  
C 1.2280151639 -0.1218617228 3.474026006  
C 0.1802287511 -0.2414627795 4.3416857203  
C 0.5138256403 -0.27786796 5.7973884363  
O -0.5583275938 -0.3488087019 6.535176936  
O 1.2135865234 0.1062025982 -1.9975671148  
O 1.650778493 -0.2448337884 6.1469728022  
H 2.2023736131 -0.0619430027 3.950134883  
H -0.8578275307 -0.3121500009 4.0424037137  
H -0.3495691179 -0.3699456849 7.4875614472  
H 2.0868781879 0.2153112088 -2.3879289671  
H -0.8819456663 -0.0942309162 -1.6957465214  
H 3.392551022 0.2444768825 -0.4791504909  
H 3.3137415993 0.13172737 1.9800762841  
H -0.9823078852 -0.2579716545 1.80665348

z+ 0.010

C 1.2965048031 0.0149184672 -0.7131968766  
C 0.0422964111 -0.006868933 -0.0065276409  
C 0.0269380824 -0.0016852426 1.3853904355  
C 1.1988503426 0.0186928021 2.0712504794  
C 2.4350349611 0.0549230893 1.3523583458

C 2.4941044424 0.047129752 0.0047319178  
O -1.0682702317 -0.0262422727 -0.6580819218  
C 1.260025652 0.0138635977 3.5283432689  
C 0.2732617069 -0.3193677925 4.3389353291  
C 0.4695693178 -0.2756931715 5.7949717163  
O -0.6356611072 -0.6310953758 6.4552334999  
O 1.1654428426 0.007773399 -1.9958302795  
O 1.4734136858 0.0332722194 6.3666235618  
H 2.2050757088 0.2926138634 3.981583361  
H -0.6982443744 -0.6441909989 3.995532917  
H -0.4335856318 -0.5789184392 7.3981086084  
H 1.9742738515 0.0235807662 -2.5380712291  
H -0.9710898705 -0.0255183823 -1.6296159886  
H 3.4391208819 0.0700428961 -0.5211314149  
H 3.3547992056 0.0851631756 1.9213497489  
H -0.93674768 0.0012795804 1.8726251616

z- 0.002

C 1.2772721503 0.0540930749 -0.678100858  
C 0.0268236581 -0.0823459144 0.0012148694  
C 0.0032630574 -0.1385629272 1.3581895561  
C 1.1911496956 -0.0636631212 2.0772373139  
C 2.4282728416 0.0723457576 1.3729491537  
C 2.4734165526 0.130238681 0.026162497  
O -1.0809439925 -0.1512334164 -0.6987262665  
C 1.2637127458 -0.113751575 3.4944746565  
C 0.224344598 -0.2362945154 4.3276713861  
C 0.4932624772 -0.2709800627 5.7886958637  
O -0.6207831325 -0.3910397928 6.4812915178  
O 1.1808589034 0.0980144547 -1.9831618083  
O 1.5898987463 -0.1973228871 6.2438435511  
H 2.2433023454 -0.0474980858 3.9545410611  
H -0.8060872139 -0.3120856832 4.0094613223  
H -0.4215589803 -0.4105669778 7.430697194  
H 2.0270668236 0.1914655405 -2.4415680851  
H -0.9252538732 -0.0982518878 -1.6520523187  
H 3.4102328712 0.2334054413 -0.5047808194  
H 3.3408440143 0.1290128328 1.9502601008  
H -0.9539812881 -0.2413059359 1.8462831123

z+ 0.002

C 1.2853780261 0.0514079432 -0.6926201096  
C 0.0339630344 -0.0745839852 -0.0005630621  
C 0.0142136888 -0.12486026 1.3693625064

C 1.1935293939 -0.0545346931 2.0726637066  
C 2.4300140948 0.0729660718 1.3618822307  
C 2.4816946869 0.124356658 0.0155105444  
O -1.0722837028 -0.1396242666 -0.6821441932  
C 1.2674843887 -0.101885214 3.5088978828  
C 0.23741552 -0.2395657113 4.332603368  
C 0.48589788 -0.2711522608 5.7920782335  
O -0.6397084395 -0.4167676685 6.473718252  
O 1.1728054561 0.0879251122 -1.9883456185  
O 1.5643404785 -0.177020626 6.2889927047  
H 2.2492198344 -0.0210901795 3.9614910786  
H -0.7897629423 -0.3341025699 4.0104600545  
H -0.4353313277 -0.4337320191 7.42017363  
H 2.0049442695 0.1720886053 -2.4780314258  
H -0.938956918 -0.095301313 -1.6424495734  
H 3.4206798825 0.219863072 -0.51274296  
H 3.3440640452 0.1278492703 1.9374519352  
H -0.9444883494 -0.2185629662 1.8561938153

z- 0.004

C 1.2741221548 0.0542166915 -0.6727463158  
C 0.0246301524 -0.084102796 -0.0010461214  
C -0.0020883737 -0.1413459221 1.3514155805  
C 1.1890889642 -0.0656246483 2.0791506277  
C 2.4256293362 0.0717422244 1.3791712578  
C 2.4685432701 0.1308765588 0.0312296029  
O -1.084596538 -0.1539491454 -0.7098333004  
C 1.2585856202 -0.1160548477 3.4874534943  
C 0.2150735991 -0.2370541008 4.3278358887  
C 0.4971092252 -0.2714143444 5.7885149938  
O -0.6082408731 -0.384154189 6.4899239588  
O 1.1869403489 0.100363301 -1.9832441073  
O 1.6031743023 -0.2023217243 6.2202549912  
H 2.2362930694 -0.0517915708 3.9526042036  
H -0.8167030724 -0.3103409503 4.0124794976  
H -0.4088782277 -0.4033982486 7.4404205145  
H 2.0400624581 0.1966671874 -2.4256390572  
H -0.9171603318 -0.0975616113 -1.6596505882  
H 3.4051895384 0.2356809054 -0.4998614269  
H 3.3378223241 0.1288216834 1.9569341636  
H -0.9594839467 -0.2455814529 1.8392151419

z+ 0.004

C 1.2896058166 0.0387256827 -0.6994005957  
C 0.036311065 -0.052252755 -0.0019256132  
C 0.0168812247 -0.0824140355 1.3750597127  
C 1.1934272337 -0.027616185 2.0719423329  
C 2.4307060065 0.0704772619 1.3580514815  
C 2.4860682309 0.1002713431 0.0108492935  
O -1.0708941605 -0.1035491811 -0.6746082382  
C 1.2650561488 -0.0624184762 3.5160573309  
C 0.2456317449 -0.2634764983 4.3345078277  
C 0.4821684469 -0.2738955777 5.7935608829  
O -0.6403065998 -0.4867343124 6.4686144636  
O 1.1713349513 0.0581077109 -1.9918442191  
O 1.5437990747 -0.1121905967 6.3111877339  
H 2.2402786968 0.0774507578 3.9684543724  
H -0.7702835158 -0.4313490454 4.006974413  
H -0.4352028353 -0.4858342788 7.4142560616  
H 1.9980485638 0.1189912038 -2.4961265861  
H -0.9468761168 -0.0754327971 -1.6383636616  
H 3.4276389462 0.1715721578 -0.516582024  
H 3.346259082 0.1187747629 1.9320215438  
H -0.9445390049 -0.1435341417 1.8618964875

z- 0.006

C 1.2718862974 0.0543027557 -0.6690606447  
C 0.0235261132 -0.0857919419 -0.0056900862  
C -0.007795338 -0.1439480972 1.3441059217  
C 1.1846969746 -0.0674598419 2.0801249148  
C 2.420719846 0.0711168463 1.3856312259  
C 2.4630638681 0.1314555219 0.0358916665  
O -1.0866021058 -0.1568139797 -0.7234311323  
C 1.2507982304 -0.118187764 3.4815426226  
C 0.2043946151 -0.238064044 4.3303478453  
C 0.5019128199 -0.2721594393 5.7900296693  
O -0.5934278344 -0.3764319591 6.5019051191  
O 1.1945231002 0.1025955898 -1.9857920389  
O 1.6179635915 -0.2091084042 6.1960259392  
H 2.2270097627 -0.0555322722 3.9509997852  
H -0.8292027107 -0.3095200028 4.0192385564  
H -0.3923106196 -0.3955307974 7.4532675535  
H 2.0545812044 0.2022071652 -2.4112771433  
H -0.9070771996 -0.0963889396 -1.6696356135  
H 3.400439966 0.2378630121 -0.493867284  
H 3.3322676821 0.1286374927 1.9642295648  
H -0.9662552636 -0.2495679003 1.8299965586

z+ 0.006

C 1.2919545647 0.0235031659 -0.7042838139  
C 0.0375393755 -0.0187123914 -0.00201892  
C 0.0194528703 -0.0245433846 1.381524785  
C 1.1944348592 0.0052518062 2.0722174675  
C 2.43215126 0.0605842775 1.3554488495  
C 2.4892610343 0.0642652947 0.0075788722  
O -1.0713366 -0.0471154592 -0.6658936347  
C 1.2615356653 -0.0121456872 3.522714578  
C 0.2600646915 -0.2988710105 4.334111324  
C 0.4774213379 -0.2791344171 5.7932883735  
O -0.6333968352 -0.5817486558 6.4590180427  
O 1.1678067298 0.0241479505 -1.9935455735  
O 1.5106867927 -0.0258121803 6.3336718468  
H 2.2203661222 0.2113761692 3.9769390783  
H -0.7312187493 -0.5654915327 3.9967377635  
H -0.4331861294 -0.5537877397 7.4045699904  
H 1.9887874588 0.0533230906 -2.5119775675  
H -0.9567180789 -0.0378404894 -1.6327675567  
H 3.4329222604 0.1014419775 -0.5196419477  
H 3.3498726486 0.0957384358 1.9271276569  
H -0.9432882781 -0.04075622 1.8697633857

z- 0.008

C 1.2714630509 0.0520821052 -0.6671624094  
C 0.0243767112 -0.0923305059 -0.013007804  
C -0.0132093189 -0.149565585 1.3359327607  
C 1.178113903 -0.0679584683 2.0801135063  
C 2.4135874087 0.074415765 1.3924103365  
C 2.4577072812 0.1341859612 0.0404271794  
O -1.0855679114 -0.168929237 -0.7399429137  
C 1.2399614597 -0.1171117695 3.4773278469  
C 0.1919476166 -0.2385381157 4.334927676  
C 0.5061734442 -0.2702066185 5.7931401838  
O -0.5780956115 -0.364789968 6.5166962719  
O 1.2047194116 0.1003502582 -1.9907853586  
O 1.6321707494 -0.2131706089 6.1722249877  
H 2.2145905359 -0.0523600565 3.9509332118  
H -0.8433621921 -0.3125116203 4.0287636852  
H -0.3742943457 -0.3823290184 7.4688199417  
H 2.0714319315 0.2055559181 -2.3987499857  
H -0.893564354 -0.1045233432 -1.6825154504  
H 3.3965766398 0.2441139305 -0.4862549475

H 3.3236749471 0.1358230089 1.9728174164  
H -0.9732883572 -0.2585290321 1.8184668652

z+ 0.008

C 1.2950266459 0.0127120757 -0.7087696754  
C 0.0405726469 -0.0165704702 -0.0043738552  
C 0.023369219 -0.0106366171 1.3838748445  
C 1.1962680956 0.017600376 2.071766668  
C 2.4333896146 0.0610253311 1.3541113019  
C 2.4920651338 0.0529352347 0.0062726648  
O -1.0688371381 -0.0435648501 -0.6619168408  
C 1.2592469408 0.0124269264 3.5263333764  
C 0.2687723465 -0.3112800024 4.3360474634  
C 0.4720162528 -0.2713299625 5.7940774559  
O -0.6331400893 -0.6134586979 6.4556923806  
O 1.1673358059 0.0036768846 -1.994764043  
O 1.4856270383 0.0262833864 6.3515598947  
H 2.2070252928 0.2798203619 3.9803927275  
H -0.7071665464 -0.6246103223 3.9942673942  
H -0.434648411 -0.5668141122 7.4002051179  
H 1.9823106233 0.0244160296 -2.5251955309  
H -0.9627793857 -0.0426067693 -1.6312267296  
H 3.4366304399 0.0811510441 -0.5199856254  
H 3.3519406151 0.0969311265 1.9245758306  
H -0.9399121405 -0.0144339731 1.8716381798

Zero Field

C 1.2811736491 0.0540942266 -0.6853218123  
C 0.030307662 -0.0805528412 0.0008674421  
C 0.0091842265 -0.135823234 1.3639938949  
C 1.1926468403 -0.0617812877 2.0746647528  
C 2.4295505806 0.0727876229 1.3669666064  
C 2.4777787918 0.1296380548 0.0208533783  
O -1.0764273113 -0.1487479645 -0.6897385126  
C 1.2663635243 -0.1116772737 3.5019098599  
C 0.2313699976 -0.2355634445 4.3296073768  
C 0.4892870157 -0.270588509 5.7900288914  
O -0.6315477069 -0.3974282817 6.4769072346  
O 1.1762506017 0.0959671687 -1.985147037  
O 1.5771232602 -0.1931391839 6.2670620543  
H 2.2476324241 -0.0435781326 3.9577482858  
H -0.7980391625 -0.3137432196 4.0095895743  
H -0.4298522682 -0.417371616 7.4247857543  
H 2.0151971918 0.1868469172 -2.4595949199

H -0.9324221953 -0.0987753788 -1.6466278166  
H 3.415161159 0.2312864496 -0.5092594709  
H 3.3426985474 0.1290610295 1.9436373743  
H -0.948325828 -0.2372391019 1.8516510888

x- 0.010

C 1.276653981 0.0324534641 -0.6775895117  
C 0.025130574 -0.0476888448 0.017089265  
C 0.0076071563 -0.0757766173 1.3712671714  
C 1.2059897524 -0.0219265794 2.0793323727  
C 2.440576371 0.0692802695 1.3651411425  
C 2.4803317408 0.090856429 0.0164086303  
O -1.0918758481 -0.0907152638 -0.6869111626  
C 1.273892337 -0.052795062 3.5038717453  
C 0.2360779536 -0.243749894 4.3213708899  
C 0.4718219715 -0.2550713399 5.7819780794  
O -0.6382915788 -0.5401085952 6.4659785508  
O 1.1596682374 0.0478122901 -1.975937378  
O 1.5218620051 -0.0345705714 6.2843233216  
H 2.2469848719 0.0736525223 3.9666944933  
H -0.7767051014 -0.4071491262 3.9818862529  
H -0.4015156749 -0.5558337582 7.4060162993  
H 1.9986834548 0.0961656741 -2.4624419747  
H -0.9061574967 -0.0678278088 -1.6365039626  
H 3.4184379855 0.1531846672 -0.5208220153  
H 3.3622621126 0.1156293945 1.9309900528  
H -0.946321805 -0.1321482498 1.8724407378

x+ 0.010

C 1.2865193058 0.0694719002 -0.6957520715  
C 0.0371566115 -0.1082721072 -0.0112273928  
C 0.018825187 -0.1911377786 1.3639303072  
C 1.1886108966 -0.1013237549 2.0711356951  
C 2.424258105 0.065935694 1.3644764045  
C 2.47686092 0.1524541347 0.0183795538  
O -1.0632924357 -0.1910518865 -0.6801299354  
C 1.2680340595 -0.1605879738 3.5053990805  
C 0.2375824082 -0.2194911742 4.3367453665  
C 0.4981816784 -0.2658056922 5.7998670523  
O -0.6245276049 -0.3097630105 6.4705908841  
O 1.1855761578 0.1368972623 -1.996552087  
O 1.5981294845 -0.2617652445 6.2709902844  
H 2.2547121854 -0.1426656702 3.9540876829  
H -0.7991343547 -0.2287056272 4.0279275168

H -0.4743940958 -0.3376301408 7.4279031643  
H 2.0204018633 0.2734468377 -2.4619529037  
H -0.9746550898 -0.1117234228 -1.6441787577  
H 3.414193052 0.2837919379 -0.5050734733  
H 3.3332321849 0.1276516914 1.9472843537  
H -0.9411575191 -0.3260529748 1.8407322752

x- 0.002

C 1.2801812026 0.0504311309 -0.6835983333  
C 0.0291362167 -0.0746676142 0.0039207076  
C 0.0083477836 -0.1246578702 1.3650144373  
C 1.194823912 -0.0539936125 2.0755564355  
C 2.4313323478 0.073236738 1.3668462101  
C 2.4781467645 0.1236655281 0.020321866  
O -1.0793541528 -0.1389323196 -0.6898966229  
C 1.2675407486 -0.1011775872 3.5018139822  
C 0.2317323123 -0.2375087689 4.3280618092  
C 0.486702776 -0.2695397217 5.7882611374  
O -0.6339699202 -0.4203466596 6.4758467035  
O 1.1733703776 0.0870707732 -1.9831150164  
O 1.569807218 -0.1705964819 6.2690619442  
H 2.2475382078 -0.0229836294 3.9590176657  
H -0.7953321144 -0.3301801287 4.0047109551  
H -0.4243963399 -0.4391826455 7.4220598272  
H 2.0125032526 0.1695709981 -2.4599101195  
H -0.9262044331 -0.0947456286 -1.6453162522  
H 3.4157124475 0.2185785803 -0.5109750442  
H 3.3459336602 0.1281361434 1.9415654455  
H -0.9484392673 -0.2185042243 1.8553352622

x+ 0.002

C 1.2821306581 0.0571143208 -0.6870793669  
C 0.0314234294 -0.0856199707 -0.0016417232  
C 0.0102938146 -0.1455575775 1.3636185854  
C 1.1910875338 -0.0686960581 2.0739207299  
C 2.4281278072 0.0720105846 1.3667717546  
C 2.4775773172 0.13436377 0.0208571499  
O -1.0736978171 -0.1569592984 -0.6885629312  
C 1.2660562281 -0.1206244199 3.5021469987  
C 0.2320597776 -0.2340208211 4.3310141991  
C 0.491633048 -0.2712250906 5.7917558023  
O -0.6297450046 -0.3786015559 6.4763887581  
O 1.1785707882 0.1035941395 -1.9871028637  
O 1.5827497818 -0.2104127483 6.2665839501



H 2.2484573689 -0.0607660102 3.9565032703  
H -0.7991550434 -0.3003367851 4.0136273026  
H -0.4372131278 -0.3991830162 7.4261458537  
H 2.0170120129 0.2023146237 -2.4597376353  
H -0.9396500527 -0.1016587812 -1.6469494175  
H 3.4150456259 0.2416794091 -0.5077338331  
H 3.3401473444 0.1293917795 1.9449631279  
H -0.9477984905 -0.253133494 1.8490932882

x- 0.004

C 1.2792700738 0.0466384982 -0.6820145651  
C 0.0280719253 -0.0687466619 0.0069232624  
C 0.0077850933 -0.1136481333 1.3661153008  
C 1.197164933 -0.0464595134 2.0764318637  
C 2.4332708748 0.0731992733 1.3666378181  
C 2.4785569929 0.1172065757 0.0196701254  
O -1.082333882 -0.1287756502 -0.6898859855  
C 1.2687420714 -0.0906117405 3.5019697424  
C 0.2321363459 -0.2389180443 4.3265295945  
C 0.483743511 -0.2674476309 5.7866284382  
O -0.6359468601 -0.4450107899 6.4746146774  
O 1.1703935757 0.0782084038 -1.981259598  
O 1.5613295882 -0.1447547014 6.2715169271  
H 2.2473748642 -0.0023904175 3.9605983965  
H -0.792331054 -0.3461962452 3.9997501652  
H -0.4187258549 -0.463128722 7.4191521921  
H 2.009681637 0.1525972519 -2.4602982916  
H -0.9203630578 -0.0900778356 -1.6438248197  
H 3.4162176475 0.2051874298 -0.5130408803  
H 3.3494034056 0.1265270415 1.9393777386  
H -0.9483288308 -0.1997253879 1.8589908977

x+ 0.004

C 1.2831422279 0.0602522933 -0.688995007  
C 0.0326632821 -0.0910424782 -0.0042369075  
C 0.01177847 -0.1562095897 1.363268959  
C 1.1897962173 -0.0763263219 2.0731560113  
C 2.42688021 0.0708489956 1.3664815058  
C 2.477376618 0.1391039716 0.0207368251  
O -1.0710255593 -0.1654896094 -0.6872269927  
C 1.2658558926 -0.1302453277 3.5025845237  
C 0.2327447762 -0.2314711609 4.3324485158  
C 0.4936580483 -0.2708714592 5.7936343642  
O -0.627814252 -0.3602151589 6.4758238095

O 1.1808134411 0.1117771318 -1.9892434016  
O 1.5877616312 -0.2259215277 6.2664505299  
H 2.2493669483 -0.0797915517 3.9555698007  
H -0.800200557 -0.2845367839 4.017659764  
H -0.4447687384 -0.3820306775 7.42743323  
H 2.0186964853 0.2190252826 -2.459910477  
H -0.947369794 -0.1044375653 -1.6470780448  
H 3.4147898919 0.2523642031 -0.5065929535  
H 3.3378559679 0.1292961485 1.9461478494  
H -0.9468882073 -0.2704058144 1.8464710957

x- 0.006

C 1.2783838677 0.0424554799 -0.6804985204  
C 0.0270473272 -0.0623975698 0.0100897591  
C 0.0074733696 -0.1020439817 1.3674868604  
C 1.1998065948 -0.0387108185 2.077347757  
C 2.4354513224 0.0726036622 1.3662855144  
C 2.4790568737 0.1097744264 0.018800326  
O -1.085422534 -0.1175889027 -0.6894257054  
C 1.2702034288 -0.0792551581 3.5023358378  
C 0.2329174059 -0.2402271884 4.3249258726  
C 0.480351799 -0.2643712044 5.7850502637  
O -0.6375136213 -0.4728219309 6.4726646875  
O 1.1671574418 0.068827893 -1.9794582398  
O 1.5509828334 -0.1139974194 6.2748018588  
H 2.2472952492 0.0199401025 3.9624004849  
H -0.788467907 -0.3635934166 3.9943756501  
H -0.4131805099 -0.4902814095 7.4156002859  
H 2.0064876673 0.1349551791 -2.4608402163  
H -0.9150758931 -0.0842962109 -1.6418906425  
H 3.4168353997 0.1901628546 -0.51538042  
H 3.3532695334 0.1240454129 1.9368950369  
H -0.9479466486 -0.1795067997 1.8630165493

x+ 0.006

C 1.2842231468 0.0632958027 -0.6910783929  
C 0.0340182382 -0.0964952746 -0.0066934935  
C 0.013638906 -0.1670980987 1.3632116985  
C 1.1888980247 -0.0841518125 2.072430109  
C 2.4258112365 0.0694278745 1.3659979406  
C 2.4772139952 0.1435636708 0.0202831527  
O -1.068403718 -0.1738189416 -0.6853886342  
C 1.2660904703 -0.1398796981 3.5032754917  
C 0.2338901081 -0.2284008339 4.33389131

C 0.4954481144 -0.2698874248 5.7956147856  
O -0.6262494385 -0.3429564482 6.4746626224  
O 1.1827420814 0.1199084699 -1.9915342741  
O 1.591960388 -0.2393157325 6.2671644711  
H 2.250692905 -0.0991447045 3.954830687  
H -0.8005519349 -0.2680245185 4.0214124611  
H -0.4534033664 -0.3662799579 7.4281631135  
H 2.019863536 0.2361241174 -2.4603571104  
H -0.9557391903 -0.1069131888 -1.6466854186  
H 3.414609283 0.2626695131 -0.5057594417  
H 3.3359239395 0.1289015762 1.9469396579  
H -0.945563725 -0.28785139 1.8442022642

x- 0.008

C 1.2775312488 0.0377354237 -0.6790392692  
C 0.0260816812 -0.0553642829 0.0135103519  
C 0.0074114887 -0.0893358223 1.369263408  
C 1.2027296672 -0.0304234753 2.0783101625  
C 2.4378705093 0.0713906999 1.3657578864  
C 2.4796587202 0.1010321999 0.0176664953  
O -1.088587955 -0.1049296285 -0.6883710697  
C 1.2719752463 -0.0665625509 3.5030085626  
C 0.2343129706 -0.2419575699 4.3232096002  
C 0.4764506256 -0.2604051164 5.7834935133  
O -0.6385397927 -0.504323102 6.4697367264  
O 1.1635316523 0.0585990601 -1.9777030199  
O 1.5380854906 -0.0777564201 6.2791431629  
H 2.2472580586 0.0454943461 3.9644061759  
H -0.7831965463 -0.3841863935 3.9883831672  
H -0.4077406826 -0.5209441764 7.4111834028  
H 2.0027584613 0.1159996596 -2.4616070075  
H -0.9103247778 -0.0769152466 -1.6393886463  
H 3.4176092084 0.1728510535 -0.5179935107  
H 3.3575408633 0.1205437755 1.9340678488  
H -0.9473031379 -0.1568694334 1.8675450591

x+ 0.008

C 1.2853467511 0.0663387742 -0.6933229015  
C 0.0354977244 -0.1021685754 -0.009025745  
C 0.0159566711 -0.1786034194 1.3634278964  
C 1.1884730314 -0.092405712 2.0717538136  
C 2.4249434059 0.0677777117 1.3653299559  
C 2.4770564492 0.1479463045 0.0195097985  
O -1.0658399135 -0.1822384417 -0.6830424578

C 1.2667882823 -0.1498764567 3.5042066155  
C 0.2354728212 -0.2245164356 4.3353206415  
C 0.4969540888 -0.2682155838 5.7976907826  
O -0.6251117279 -0.3263259118 6.4729421881  
O 1.1843550206 0.1282155618 -1.9939657104  
O 1.5954127176 -0.2510810275 6.2686500474  
H 2.2524470159 -0.1197662545 3.9543398839  
H -0.8002397898 -0.2497773724 4.0248449439  
H -0.4631837336 -0.3515952107 7.4283453133  
H 2.020484613 0.2540788119 -2.4610379282  
H -0.9648110345 -0.1092737225 -1.6457431718  
H 3.4144264442 0.2730086097 -0.5052575508  
H 3.3343826501 0.1283110209 1.9473300891  
H -0.9436984876 -0.3061596708 1.8422864957

y- 0.010

C 1.2625013587 0.1676574655 -0.6534598278  
C 0.0675926954 -0.3034785299 -0.0119620641  
C 0.0657401876 -0.5425663816 1.3384357374  
C 1.2145628266 -0.3394081161 2.0633250298  
C 2.4144439897 0.0636113313 1.3952166806  
C 2.4370669039 0.3341158409 0.0731361881  
O -1.0040497782 -0.5031891921 -0.7268207826  
C 1.2630861704 -0.4847291075 3.4964274036  
C 0.2446570884 -0.2164571444 4.2970278867  
C 0.4316038698 -0.3154646671 5.7658835151  
O -0.450607714 0.4193559278 6.4056295402  
O 1.1254531111 0.3842756383 -1.9311893405  
O 1.2809717777 -0.9813787177 6.2763588218  
H 2.213516281 -0.741858329 3.9508554104  
H -0.7079471756 0.1552850479 3.9427166148  
H -0.2614707438 0.4411237986 7.3563342662  
H 1.8790716511 0.8151781885 -2.3640709855  
H -0.9087729837 -0.1942910133 -1.6421198159  
H 3.336157915 0.6807822754 -0.4185794586  
H 3.3114951065 0.1895961666 1.986693777  
H -0.8499595376 -0.8744874821 1.8047444031

y+ 0.010

C 1.2828156015 -0.0542795229 -0.6633203256  
C 0.0271830484 0.1337874748 0.0052997872  
C -0.0068896677 0.2541521413 1.3692512651  
C 1.1667632409 0.2056032163 2.0854646389  
C 2.4146717111 0.0898325284 1.3941850346

C 2.4743811434 -0.0601648049 0.054382983  
O -1.0689534985 0.1923800075 -0.6979126224  
C 1.2055830978 0.2324214948 3.5220024161  
C 0.241998519 -0.2412263402 4.2984136003  
C 0.4362835544 -0.2391376311 5.7710864669  
O -0.3463844952 -1.1181538355 6.3506824545  
O 1.1813827392 -0.1869487921 -1.957313314  
O 1.2129537728 0.4795069765 6.3245219892  
H 2.1149997062 0.5776673779 4.0010964694  
H -0.6576462062 -0.7067767073 3.9173145418  
H -0.1553085583 -1.1922908058 7.2987617723  
H 1.9979741285 -0.4453566089 -2.4107506871  
H -0.9326440705 -0.0267501169 -1.6332508406  
H 3.4170856522 -0.192819149 -0.4591677808  
H 3.3239512308 0.0826268917 1.9800775533  
H -0.9650876498 0.3695992054 1.8537575978

y- 0.002

C 1.276950319 0.0881745982 -0.6816250705  
C 0.03688006 -0.141955666 -0.0003740595  
C 0.0217351639 -0.2499688925 1.3604326366  
C 1.2008247649 -0.139945788 2.071614441  
C 2.4298788558 0.0678691273 1.3680275468  
C 2.4710567828 0.1877013159 0.025630994  
O -1.0650435717 -0.2481714569 -0.6930471158  
C 1.2746167828 -0.2168112347 3.4989411801  
C 0.2336567443 -0.2169881946 4.3266868739  
C 0.4847669701 -0.2814953 5.7871420768  
O -0.6365016616 -0.1722376515 6.4763703466  
O 1.1646585934 0.1813513703 -1.9779383379  
O 1.5678024037 -0.416128411 6.2626837458  
H 2.2590641574 -0.2499929937 3.9519280277  
H -0.7964976286 -0.1493146863 4.0061596332  
H -0.4372446714 -0.1918643785 7.4247426397  
H 1.9916755688 0.3611228736 -2.4482928099  
H -0.9292540558 -0.1297616491 -1.6452642921  
H 3.4010585436 0.3571011521 -0.5001153934  
H 3.3415552479 0.1398527989 1.9453623285  
H -0.9265263692 -0.4248639336 1.8455176085

y+ 0.002

C 1.282859361 0.021502084 -0.6842386887  
C 0.0261712653 -0.0214130748 0.0036083758  
C 0.0014289926 -0.0262423065 1.368415081  
C 1.1864189351 0.0134683196 2.0777007748  
C 2.4282998859 0.0782783295 1.3689623476  
C 2.480683204 0.0745312095 0.021618839  
O -1.0820037442 -0.0529701612 -0.686349692  
C 1.2559420888 -0.011711124 3.5064900162  
C 0.235628341 -0.2512846003 4.3257731443  
C 0.4843500231 -0.2612607729 5.7883535966  
O -0.5975434458 -0.6085897551 6.4601760174  
O 1.1807821818 0.0136506432 -1.985062659  
O 1.5345797795 0.0130473605 6.2775195277  
H 2.2239150436 0.1502423085 3.9671714875  
H -0.7713867796 -0.4643342834 3.9954487043  
H -0.3989892892 -0.6312880283 7.4087023633  
H 2.0239425036 0.0166254706 -2.460683268  
H -0.9349382198 -0.0713673408 -1.6439826122  
H 3.4224455825 0.1111369625 -0.5091548272  
H 3.3422822376 0.1196179788 1.9456009129  
H -0.9597549471 -0.0579662193 1.8585135588

y- 0.004

C 1.2726336357 0.11514684 -0.6755023064  
C 0.0444254063 -0.1930853253 -0.0021984605  
C 0.0342713684 -0.343879242 1.3563841748  
C 1.2066159191 -0.204435372 2.0688740601  
C 2.4277706483 0.0650208767 1.3723815724  
C 2.4626635582 0.2352749133 0.0348830184  
O -1.0504632718 -0.3303788838 -0.6987783344  
C 1.276503655 -0.304517576 3.4977206328  
C 0.238362191 -0.2086698619 4.3199841475  
C 0.4741586356 -0.2927679323 5.7820391399  
O -0.611349521 0.0196366188 6.4648639096  
O 1.1524678474 0.2491925514 -1.9673446378  
O 1.5179101302 -0.6053441316 6.2629371318  
H 2.2555285196 -0.4178874764 3.9497424942  
H -0.776332464 -0.0287935772 3.9925604044  
H -0.4157542381 0.0065925291 7.4141155771  
H 1.9631383893 0.5069548074 -2.4304443787  
H -0.924813338 -0.1525252304 -1.6434926973  
H 3.3846363011 0.4610478866 -0.4838041797  
H 3.336817399 0.1518034047 1.951984543  
H -0.904077714 -0.5747128192 1.8376771887

y+ 0.004

C 1.2831963956 -0.0036656588 -0.6803947244  
C 0.0245942779 0.0267033721 0.0055352856  
C -0.0026248487 0.0615959438 1.3711528635  
C 1.1811695051 0.0736258875 2.0800928805  
C 2.4259099518 0.0816117438 1.3734285833  
C 2.4806475657 0.0305514765 0.0268421854  
O -1.0822369616 0.0245727312 -0.6858278344  
C 1.2439415026 0.0676572867 3.5111705575  
C 0.2399821329 -0.2558757154 4.3192001327  
C 0.4738047189 -0.252133604 5.7846311224  
O -0.5445344549 -0.7787295123 6.43603393  
O 1.1816618137 -0.0508781913 -1.9805332851  
O 1.4634732171 0.1777531207 6.2893291008  
H 2.1955875601 0.2979641126 3.9768882525  
H -0.7375321866 -0.5648002996 3.9752875253  
H -0.3494109596 -0.8101788365 7.3851090877  
H 2.023048528 -0.1243906125 -2.4538452266  
H -0.9354383365 -0.0526854634 -1.6408227525  
H 3.4241503198 0.0141865115 -0.501839937  
H 3.3397126649 0.1092107457 1.9512727201  
H -0.9639894062 0.0815779617 1.861872533

y- 0.006

C 1.2687795584 0.1363003759 -0.6683832682  
C 0.0521964375 -0.235443389 -0.0047682002  
C 0.0458286704 -0.4208016298 1.3513610157  
C 1.2105723217 -0.2568906326 2.0666657918  
C 2.4241824475 0.0640392194 1.3788858585  
C 2.4539546993 0.2741866239 0.0465537257  
O -1.0350409233 -0.3973646515 -0.7065813338  
C 1.2742232969 -0.3757562834 3.4971398348  
C 0.2421963312 -0.2073869301 4.312142954  
C 0.4605919135 -0.3026565449 5.7763686784  
O -0.5673996647 0.17776256 6.4477941463  
O 1.1417534403 0.3028208588 -1.9555039148  
O 1.4467676384 -0.7590613459 6.2656986596  
H 2.2441246235 -0.5506535201 3.9493956227  
H -0.7515693815 0.0554538702 3.9756883886  
H -0.3747305426 0.174710561 7.3977842516  
H 1.9341986518 0.6263166576 -2.4096476265  
H -0.919639128 -0.1698645026 -1.6423400676  
H 3.3679919128 0.5466746375 -0.4637243907

H 3.329769023 0.1648439917 1.9617994149  
H -0.8836383263 -0.6935569262 1.828253459

y+ 0.006

C 1.2830849306 -0.0239484274 -0.6751814475  
C 0.0245571965 0.0673455217 0.0064568894  
C -0.0048082659 0.1354008476 1.3720926292  
C 1.176347002 0.1243598208 2.0821444035  
C 2.4227221983 0.0844934075 1.3794803956  
C 2.4791641337 -0.0053782964 0.0346713067  
O -1.0794391888 0.0889351558 -0.6877863242  
C 1.2313127217 0.1327975066 3.5153752433  
C 0.2426947651 -0.2539478938 4.3119471957  
C 0.4611723934 -0.245430535 5.7801550653  
O -0.4818034571 -0.9160456985 6.4083365858  
O 1.1814359796 -0.104137608 -1.9736990161  
O 1.3807630855 0.3054198203 6.3016002985  
H 2.1669787898 0.413507832 3.9859081543  
H -0.7056194242 -0.6318421147 3.9543663025  
H -0.2890867099 -0.9602109745 7.3575305856  
H 2.0171066494 -0.2453584716 -2.4422090536  
H -0.9349393752 -0.0403025303 -1.6378190185  
H 3.423043609 -0.0663888666 -0.4900552118  
H 3.3356020839 0.0995379752 1.9593601519  
H -0.9651761174 0.1948665293 1.8619078645

y- 0.008

C 1.265430986 0.1534262678 -0.6609420848  
C 0.0599317848 -0.2715329022 -0.008020354  
C 0.0562939423 -0.4858552194 1.3453648228  
C 1.213183368 -0.3012529971 2.0648540437  
C 2.4197005177 0.0635187995 1.3866166734  
C 2.4454226594 0.3063991915 0.0594503362  
O -1.0195522356 -0.4537100926 -0.7159560911  
C 1.2695759089 -0.4349051442 3.4967644332  
C 0.2444166185 -0.2108963407 4.3043720604  
C 0.4460965497 -0.310239951 5.7709422447  
O -0.5124365344 0.3092392988 6.4273633609  
O 1.132796443 0.3469782491 -1.9433400015  
O 1.3657865231 -0.8821861904 6.2706509574  
H 2.2295861109 -0.6562476893 3.9498585125  
H -0.7281489537 0.1134296614 3.9587437921  
H -0.3220451621 0.3181706653 7.377872316  
H 1.9059683737 0.7278303014 -2.3871907291



H -0.9143139395 -0.1829850884 -1.641777422  
H 3.3518536985 0.6184492416 -0.4417430438  
H 3.3212878559 0.1772219719 1.9735081414  
H -0.865721515 -0.7911790329 1.8171910315

y+ 0.008

C 1.2830241307 -0.0403630868 -0.6694622517  
C 0.0255500224 0.1025499274 0.0060964907  
C -0.0062621668 0.1985125411 1.3712075973  
C 1.1712607995 0.1675084146 2.0838603957  
C 2.4186913624 0.0869643864 1.3866104872  
C 2.4769357016 -0.0351210009 0.0441191993  
O -1.074639355 0.1440665015 -0.6923138722  
C 1.2180804341 0.1867532032 3.51897021  
C 0.243070527 -0.2484975841 4.3050790482  
C 0.4485866027 -0.2411633044 5.7756631911  
O -0.4145928231 -1.0268743229 6.3800330856  
O 1.1814322354 -0.1483478018 -1.9659104969  
O 1.2964231892 0.4034913202 6.3131825829  
H 2.1395486623 0.5047358938 3.9938625936  
H -0.6791298922 -0.6768031741 3.9352670818  
H -0.2227175063 -1.085676535 7.3287889526  
H 2.0086489418 -0.3508653536 -2.4275421217  
H -0.9337017971 -0.0320127459 -1.6356869887  
H 3.4205334089 -0.1343297859 -0.4752703689  
H 3.3299315348 0.0903013546 1.9693683466  
H -0.9655610122 0.2888441527 1.8586598378

Caffeic Acid (Anion)

z- 0.010

C 1.2480314048 0.0536804553 -0.7586825309  
C 0.0323155268 -0.0796389795 -0.0259392565  
C -0.0192354455 -0.1353956888 1.326261165  
C 1.1644008696 -0.0613693837 2.0763819062  
C 2.3503416862 0.0698934967 1.3890850963  
C 2.4046301816 0.1276456444 0.0068796332  
O -1.0587654161 -0.1440993579 -0.8342448008  
C 1.2016202837 -0.1180146815 3.5241013609  
C 0.207925903 -0.2391246342 4.3901962737  
C 0.5174725146 -0.2752545964 5.8231881171  
O -0.5785374055 -0.3910302111 6.576875768  
O 1.1506095952 0.0920513629 -2.0440713387  
O 1.6135071198 -0.2120707385 6.3000236724  
H 2.1895732442 -0.0528530185 3.9702372446

H -0.8332708207 -0.3131394666 4.1126082758  
H -0.3044895474 -0.4048993466 7.5060615501  
H -0.6127272979 -0.0698987893 -1.7108677241  
H 3.3570456593 0.2328814477 -0.4976924774  
H 3.2682677598 0.1298614769 1.9616660771  
H -0.9770648156 -0.2367069915 1.8197029881

z+ 0.010

C 1.2402760305 0.0572824805 -0.7412277821  
C -0.0021865765 -0.0830108575 0.0234648385  
C -0.0109530539 -0.1387463125 1.3548951938  
C 1.2134753357 -0.0626987938 2.1032747788  
C 2.4223219279 0.0707735007 1.3561494346  
C 2.4580490496 0.1287585276 0.0180628519  
O -1.095875907 -0.1459561708 -0.738754174  
C 1.2756291139 -0.1100295723 3.4663522802  
C 0.2347658502 -0.2373289258 4.3905578182  
C 0.4619254343 -0.267476588 5.7524271986  
O -0.6930888632 -0.4043012797 6.5199162053  
O 1.1590152456 0.1036601601 -1.9561424893  
O 1.5060831847 -0.1946120852 6.4139463177  
H 2.2690083179 -0.0401157899 3.8993009987  
H -0.7888583807 -0.3208383795 4.061242347  
H -0.3244161084 -0.4123077694 7.4077741232  
H -0.7725119224 -0.0821212529 -1.6597131847  
H 3.3781499296 0.2286822555 -0.5401371407  
H 3.3491361537 0.1257947817 1.9158675855  
H -0.9582937615 -0.242889929 1.8645137988

z- 0.002

C 1.2432526723 0.0544781034 -0.7477098486  
C 0.0211647258 -0.0805172646 -0.0011367905  
C -0.0124681121 -0.1363597905 1.3433771735  
C 1.1867025736 -0.0619458858 2.084728782  
C 2.3739092503 0.0690003579 1.381465946  
C 2.4195719427 0.1270086489 0.0105528201  
O -1.0715258169 -0.1439432932 -0.7913472096  
C 1.2286944287 -0.1154348061 3.5062520638  
C 0.221233398 -0.2385280423 4.3793745001  
C 0.4989336653 -0.2714078937 5.791853754  
O -0.6179482058 -0.3981234626 6.5415268317  
O 1.1416781416 0.0951869063 -2.0046234566  
O 1.5733916252 -0.2006897549 6.3345974661  
H 2.2177188357 -0.0471346337 3.9497081088

H -0.8127976747 -0.3162277652 4.0807912944  
H -0.3186080826 -0.4083964591 7.4592017292  
H -0.662277211 -0.0731210303 -1.6835788463  
H 3.3602297246 0.2298312125 -0.5134707952  
H 3.2971322407 0.1271265036 1.9466475692  
H -0.9663371214 -0.2382836506 1.843559908

z+ 0.002

C 1.2429545462 0.0557783745 -0.7430162944  
C 0.0138652293 -0.0813638228 0.0082234073  
C -0.012300969 -0.1375034369 1.3479220464  
C 1.1943078113 -0.062533232 2.0908112439  
C 2.3869894841 0.0692390965 1.3766279626  
C 2.4312481424 0.1276123016 0.0158551167  
O -1.0788597729 -0.1444845775 -0.7740675825  
C 1.2397926002 -0.1143020932 3.4929287741  
C 0.2237959833 -0.2384337512 4.3786927727  
C 0.4891390514 -0.2701854184 5.7749238304  
O -0.6367410759 -0.3999750676 6.5315083461  
O 1.1475422723 0.097035456 -1.9850503164  
O 1.5546836418 -0.1976900447 6.3516140276  
H 2.2297415576 -0.045302463 3.9344407045  
H -0.8072609101 -0.3175473429 4.0716727439  
H -0.3150493238 -0.4082464835 7.4400055438  
H -0.6948195825 -0.0748667116 -1.6750991502  
H 3.3659633644 0.2293179034 -0.5178594601  
H 3.3110946314 0.1263114174 1.9408745315  
H -0.9644356814 -0.2403421041 1.8507627521

z- 0.004

C 1.2439039231 0.0545294082 -0.7502613756  
C 0.0242133158 -0.0802514635 -0.0065555289  
C -0.0132633989 -0.1361495552 1.3400910031  
C 1.1822414747 -0.0616507839 2.0822331222  
C 2.3680317446 0.0692159075 1.3834310381  
C 2.4150089821 0.1270824441 0.0086740979  
O -1.0682228509 -0.1437284911 -0.8009353713  
C 1.2229459979 -0.1159460541 3.5117361994  
C 0.2190695877 -0.2388771559 4.3810393629  
C 0.5033991648 -0.2724742023 5.7999323358  
O -0.6088245313 -0.3968824724 6.5486712567  
O 1.1413566348 0.0930420323 -2.0144483672  
O 1.5826703895 -0.2024755072 6.3266694857  
H 2.2115221911 -0.0479910414 3.9561097691

H -0.81649384 -0.316062539 4.0868099557  
H -0.3179707905 -0.4077890054 7.4699475136  
H -0.6489289151 -0.0710433386 -1.6893848045  
H 3.3585645614 0.2301235929 -0.5106896916  
H 3.2903764818 0.1277248572 1.9497601697  
H -0.9679491226 -0.2378786322 1.8389408291

z+ 0.004

C 1.2427952276 0.05555412 -0.741372988  
C 0.0099002289 -0.0817485312 0.0124878503  
C -0.0124975596 -0.1376730233 1.3496877477  
C 1.1982112926 -0.0627423454 2.0941568767  
C 2.3947951606 0.0694210556 1.3730555377  
C 2.4379648564 0.1277910714 0.0182012444  
O -1.083095408 -0.1449560295 -0.765302999  
C 1.2462547671 -0.1134949184 3.4856874734  
C 0.2247791953 -0.2379403045 4.3799460838  
C 0.4833182212 -0.2692455741 5.7670729488  
O -0.6478814548 -0.4009241364 6.5277655991  
O 1.1517461283 0.0996400412 -1.9759696603  
O 1.5447053626 -0.1972289488 6.361983216  
H 2.2367931235 -0.0444824609 3.9259013618  
H -0.8047771056 -0.3175742876 4.0685565411  
H -0.3134287042 -0.4089121999 7.4308533253  
H -0.7128610705 -0.0777351455 -1.6707849688  
H 3.3693041561 0.2294225245 -0.5210112815  
H 3.3192436562 0.1260904206 1.9368381676  
H -0.9636190738 -0.2407433279 1.854018924

z- 0.006

C 1.2449155909 0.0539879449 -0.7529839271  
C 0.0269995137 -0.0799723911 -0.0124591168  
C -0.0146989334 -0.1356931778 1.3361572837  
C 1.1770656928 -0.0614911636 2.0799854348  
C 2.3622197301 0.0692802101 1.3852500663  
C 2.4110153475 0.1270575441 0.007364381  
O -1.0651105745 -0.1437800546 -0.8110955851  
C 1.2165664779 -0.1165475373 3.5164750712  
C 0.2160769473 -0.2388798906 4.3834049993  
C 0.5078723282 -0.2732247501 5.8078145487  
O -0.5993352683 -0.3952462143 6.5569395542  
O 1.1427144432 0.0931072667 -2.0243139552  
O 1.5924305609 -0.2053084889 6.3182539109  
H 2.2048094252 -0.0493803086 3.9616334734

H -0.8212043049 -0.3150979487 4.0940605422  
H -0.315404116 -0.4072607367 7.481268265  
H -0.6358371021 -0.0711145485 -1.6954896515  
H 3.3574493845 0.2308998509 -0.5072437028  
H 3.2833886204 0.1283023662 1.9531896338  
H -0.9702827636 -0.237119972 1.833559774

z+ 0.006

C 1.2423473051 0.0563504457 -0.7403244441  
C 0.0057775848 -0.0822308352 0.0163933893  
C -0.0124375864 -0.1382123875 1.3512851462  
C 1.2026810754 -0.0628439082 2.0975657112  
C 2.4035513324 0.0698636242 1.3684928314  
C 2.4450229816 0.1282069239 0.0196955717  
O -1.0872978464 -0.1453170559 -0.7568684256  
C 1.2542959605 -0.1125056045 3.4785441615  
C 0.2266658585 -0.2378324312 4.3825144032  
C 0.4767341001 -0.2687396656 5.7603801716  
O -0.6609182015 -0.4019308677 6.524984746  
O 1.155477769 0.100570288 -1.9677475079  
O 1.5332853595 -0.1962975783 6.375709299  
H 2.2455636412 -0.0431669885 3.9169544641  
H -0.801167048 -0.3185536181 4.0660917023  
H -0.3138387393 -0.4094127913 7.4226044872  
H -0.7329263113 -0.07881402 -1.66757453  
H 3.3727373066 0.2291774837 -0.5255799629  
H 3.3284913833 0.1259521456 1.9314737101  
H -0.962394925 -0.2417451591 1.8571760757

z- 0.008

C 1.2462854152 0.0537952588 -0.7557874203  
C 0.0297129345 -0.0797767056 -0.0189240771  
C -0.0166745682 -0.1354872033 1.3315369813  
C 1.1711418263 -0.0613840666 2.0780623069  
C 2.3563829898 0.0695482732 1.3871182029  
C 2.4076003097 0.127279261 0.0067862133  
O -1.0619626174 -0.1438794931 -0.8222151435  
C 1.2094898483 -0.1172249059 3.5205810465  
C 0.2123547916 -0.2390183806 4.386496592  
C 0.5125359045 -0.2742090805 5.8155671929  
O -0.5892990153 -0.3933143634 6.5663733489  
O 1.1458531157 0.0924805912 -2.034172497  
O 1.6026929497 -0.2084219375 6.3094270699  
H 2.1975226763 -0.0509436425 3.9663187009

H -0.8268014564 -0.3142393381 4.1027023245  
H -0.310926327 -0.4062476201 7.4933118944  
H -0.6240109488 -0.0704491825 -1.7027381307  
H 3.3569751288 0.2317754998 -0.5029305117  
H 3.2760802626 0.1290354793 1.9571349794  
H -0.9733022201 -0.2368004435 1.8271219267

z+ 0.008

C 1.2415008811 0.0567966134 -0.7402593544  
C 0.0016747731 -0.0826563985 0.0201410016  
C -0.0119050536 -0.1385203 1.3530442937  
C 1.2078996244 -0.0628146619 2.1006794941  
C 2.4129556199 0.0703242218 1.3627530025  
C 2.4518581544 0.1285168491 0.0196510095  
O -1.0917384919 -0.1456941481 -0.7477561116  
C 1.2642222197 -0.1113143876 3.4720010054  
C 0.2298865704 -0.2375510276 4.386042541  
C 0.4694158896 -0.2681425206 5.7553482211  
O -0.6762063055 -0.4030756341 6.5223618246  
O 1.1580045892 0.1021050146 -1.9610787974  
O 1.5203088778 -0.195590368 6.393007297  
H 2.256387921 -0.0417222113 3.9081155401  
H -0.7959369372 -0.3194889561 4.0634788258  
H -0.3174844232 -0.4105971815 7.4147909121  
H -0.7530894662 -0.0805567449 -1.6636318599  
H 3.3757555576 0.228987929 -0.5320743125  
H 3.3386959463 0.1258918315 1.9243519783  
H -0.9605549469 -0.2423799191 1.8608044889

Zero Field

C 1.24305326 0.0550458129 -0.7452245691  
C 0.0177160687 -0.0809023349 0.0037848462  
C -0.0122956468 -0.1368839605 1.345941138  
C 1.1905840618 -0.0622260486 2.0876572481  
C 2.3800620788 0.0690469276 1.3793324911  
C 2.4250751884 0.1272420836 0.0131625007  
O -1.0751853377 -0.1441838248 -0.7824865693  
C 1.2340872193 -0.1148758776 3.4998824133  
C 0.2226446916 -0.2384228905 4.3785216593  
C 0.4942674654 -0.2706607892 5.7832231145  
O -0.6270098324 -0.3991756753 6.5358502181  
O 1.1441858725 0.0960873386 -1.9947094229  
O 1.5642153188 -0.1990238559 6.3425294841  
H 2.2235254664 -0.0461970938 3.9425529732

H -0.8098805222 -0.3168045811 4.0756650817  
H -0.3169824128 -0.4084681164 7.4491846975  
H -0.6779083396 -0.0740254475 -1.6790317686  
H 3.3629298417 0.2295070671 -0.5153745757  
H 3.3038549149 0.1266602307 1.9438646983  
H -0.9652873567 -0.2392199645 1.8474473415

x- 0.010

C 1.2220564243 0.0568038871 -0.7347152903  
C 0.0110821568 -0.0805808879 0.0357975221  
C 0.0042954558 -0.1393128609 1.3747839569  
C 1.2223960887 -0.0648412437 2.092698546  
C 2.4022282342 0.0641040946 1.3580041847  
C 2.4223673381 0.1233875445 -0.0074468819  
O -1.0864191684 -0.1386605097 -0.759783513  
C 1.2721894134 -0.1117469784 3.5000003273  
C 0.2420483611 -0.2372262836 4.3670836815  
C 0.4719574475 -0.2611279343 5.7729371329  
O -0.6826644467 -0.4118996624 6.5088525395  
O 1.0671970744 0.1022854697 -1.9807638289  
O 1.5082709494 -0.1682048232 6.3767307466  
H 2.2593489616 -0.0374255828 3.9478432013  
H -0.7805138916 -0.3304970988 4.0364519838  
H -0.3551966824 -0.4218630007 7.4168161662  
H -0.6359506088 -0.0650984716 -1.6445331466  
H 3.3538610279 0.2205863445 -0.5473208685  
H 3.3395451019 0.1176693297 1.8997535002  
H -0.9364482373 -0.243833332 1.8985810401

x+ 0.010

C 1.2622776038 0.050859434 -0.7562158662  
C 0.0246901766 -0.080602728 -0.0240779456  
C -0.0211860362 -0.1331550232 1.3219782963  
C 1.1687069294 -0.0590008661 2.0825936883  
C 2.3656223239 0.0733005846 1.3966986918  
C 2.4284967037 0.128534269 0.0277983976  
O -1.0704834927 -0.1473655148 -0.7909458386  
C 1.2067258815 -0.1158104381 3.5012288731  
C 0.2113842002 -0.2400189402 4.3885386477  
C 0.5136118805 -0.2780831979 5.7938464406  
O -0.5846771458 -0.3910941977 6.551116757  
O 1.2140329419 0.086233082 -2.0081302427  
O 1.6082844157 -0.2219507374 6.3207663568  
H 2.1988733667 -0.0493658026 3.9384798587

H -0.8292237655 -0.3107660741 4.1099664776  
H -0.3039990449 -0.4011383403 7.4734096912  
H -0.7366333701 -0.078989235 -1.7042335666  
H 3.3712192483 0.2362783556 -0.4945588945  
H 3.279180275 0.1360638304 1.9795558888  
H -0.9852520919 -0.2314104602 1.8039552887

x- 0.002

C 1.2389391291 0.055323008 -0.7431535334  
C 0.0162952494 -0.0808882066 0.0098843544  
C -0.0094505418 -0.1373532897 1.3513799449  
C 1.1962475486 -0.0628305558 2.0886637768  
C 2.3839826981 0.067983892 1.3752749936  
C 2.4244230591 0.1265377443 0.0094004767  
O -1.0769799364 -0.1433835785 -0.7790189223  
C 1.2409816062 -0.1143157193 3.4998578752  
C 0.2259309947 -0.2377532828 4.3763344335  
C 0.4898302275 -0.2683974185 5.7812738763  
O -0.6372447599 -0.401528958 6.5314488846  
O 1.1291712895 0.0983168869 -1.9920642744  
O 1.5538176475 -0.1937219491 6.3485390651  
H 2.2299132324 -0.044868098 3.9435600957  
H -0.8047349188 -0.3184042699 4.0680804805  
H -0.3227580682 -0.4113278433 7.443398962  
H -0.667899413 -0.0732652185 -1.6726771543  
H 3.3610450171 0.2279034733 -0.5211525596  
H 3.310239099 0.1247451346 1.9355888579  
H -0.9600981601 -0.2402537514 1.8571513669

x+ 0.002

C 1.2470371628 0.0545368339 -0.7473225223  
C 0.0190644962 -0.08089387 -0.0022122008  
C -0.0146805981 -0.1362986815 1.3406730859  
C 1.1853310547 -0.0616073479 2.086580715  
C 2.3765185923 0.0700301437 1.3832019079  
C 2.4256329554 0.1277610738 0.0165700015  
O -1.0734398384 -0.1448788487 -0.78543141  
C 1.2276776902 -0.1153000951 3.5000303615  
C 0.219810506 -0.2389309621 4.3806834006  
C 0.4985545111 -0.2725912578 5.7854351995  
O -0.6173174258 -0.3971405325 6.5398266919  
O 1.15848891 0.0939775932 -1.997388437  
O 1.5740284331 -0.2040271986 6.3372542141  
H 2.2176830033 -0.0472785476 3.9414362724



H -0.8145203423 -0.3153211611 4.0832079137  
H -0.3125703715 -0.4062046997 7.4547638048  
H -0.688001499 -0.0748696831 -1.6849269069  
H 3.3644980953 0.2309849543 -0.5104989055  
H 3.2979083986 0.1285413009 1.9518906302  
H -0.9700527336 -0.2379710141 1.8379971834

x- 0.004

C 1.2348250492 0.0563951239 -0.7411107022  
C 0.0150301384 -0.0809337304 0.0158696904  
C -0.0066049971 -0.1382741158 1.3566900742  
C 1.2019325221 -0.0634859693 2.089629067  
C 2.387878777 0.0671571999 1.371303543  
C 2.4237947879 0.1261554651 0.0056276365  
O -1.0786821758 -0.1423350728 -0.7754069942  
C 1.2478500869 -0.114033927 3.499773368  
C 0.2293484126 -0.2380756485 4.3741915987  
C 0.4858088651 -0.2674085604 5.7792324506  
O -0.6474268128 -0.4034174234 6.5268683559  
O 1.1144162379 0.0986631039 -1.9894237993  
O 1.5435720586 -0.1876330903 6.3547119743  
H 2.2363213527 -0.0434874143 3.9444742187  
H -0.799484862 -0.3214310298 4.0607318801  
H -0.3292194876 -0.4125421917 7.4376786356  
H -0.6586766863 -0.0702061193 -1.6661926315  
H 3.3592666752 0.2263146517 -0.5269163736  
H 3.3166337355 0.1230261248 1.9274065245  
H -0.9549326774 -0.2419293763 1.8666324832

x+ 0.004

C 1.2509325218 0.0533176392 -0.7494511758  
C 0.0203958626 -0.080790911 -0.0077966755  
C -0.0167363466 -0.1353656566 1.3358341571  
C 1.1806762045 -0.0609700678 2.0856075779  
C 2.3733965093 0.0708073051 1.3867540782  
C 2.4262992299 0.1279439804 0.019693429  
O -1.0724095491 -0.1455954321 -0.7875846169  
C 1.2219421023 -0.1154857735 3.5002665369  
C 0.2173085575 -0.2389679883 4.3827259563  
C 0.5023905052 -0.2737590303 5.7875092673  
O -0.6085613633 -0.3955427044 6.5431786057  
O 1.172528763 0.0929767547 -2.0000039523  
O 1.5830808661 -0.2089786362 6.3324584415  
H 2.2124687253 -0.0481207941 3.9406321276

H -0.81866237 -0.3135460634 4.0901487552  
H -0.308947905 -0.4050815317 7.4597029869  
H -0.6989798642 -0.0769283607 -1.6903915484  
H 3.3661860895 0.232398423 -0.5059045462  
H 3.2926578357 0.1303399595 1.959164794  
H -0.9743153745 -0.2361331115 1.8292268015

x- 0.006

C 1.2307267128 0.0564041214 -0.738942356  
C 0.0137310739 -0.0808593446 0.0224485128  
C -0.0030651701 -0.1386171397 1.3626693772  
C 1.2086200468 -0.0639435394 2.0906637627  
C 2.3926195886 0.0661826541 1.3669917613  
C 2.423441226 0.1253077478 0.0014618694  
O -1.0811439141 -0.1413183649 -0.7703798608  
C 1.2556871888 -0.1133672932 3.499803438  
C 0.233241347 -0.2376355648 4.3717219044  
C 0.481081602 -0.2653035941 5.7770841016  
O -0.6588571717 -0.4060179049 6.5211281619  
O 1.0989200896 0.1004404408 -1.9865116234  
O 1.5321136413 -0.1817939511 6.3615473292  
H 2.2436728798 -0.0418146683 3.9456571833  
H -0.7935782744 -0.3237702725 4.05252351  
H -0.337151164 -0.4155082258 7.4308220451  
H -0.6512658235 -0.0691756536 -1.6591598892  
H 3.3575779972 0.2246301313 -0.533432228  
H 3.3241406905 0.1213016524 1.9184122463  
H -0.9488615667 -0.2426232307 1.8772617543

x+ 0.006

C 1.2548004299 0.0523764698 -0.7516221483  
C 0.0217887202 -0.0807204966 -0.013329785  
C -0.0185227454 -0.1345900395 1.3310743367  
C 1.1763296806 -0.0603340674 2.0846119873  
C 2.3705282435 0.0716466871 1.3902309406  
C 2.4270133683 0.1281746086 0.0226345679  
O -1.0715060845 -0.1462025141 -0.789252507  
C 1.216485436 -0.1156882032 3.5005291826  
C 0.2150502364 -0.2392794286 4.38472671  
C 0.50625046 -0.2752059973 5.7895935857  
O -0.6001487535 -0.3939667428 6.5461612264  
O 1.1864764131 0.0911652669 -2.002640888  
O 1.59188017 -0.2134918054 6.3280598151  
H 2.2075555619 -0.0487904049 3.9398305975

H -0.8225329904 -0.312332622 4.0970146436  
H -0.3063192885 -0.4036514355 7.4644509973  
H -0.7108261744 -0.0780524582 -1.6954833225  
H 3.3678875921 0.2337548852 -0.5016852898  
H 3.2877537214 0.1322123253 1.9662721991  
H -0.9782929967 -0.2345060275 1.820594151

x- 0.008

C 1.2264536665 0.0566577141 -0.7368437751  
C 0.0124165484 -0.0807498755 0.0290252241  
C 0.000499004 -0.1390172581 1.3686252601  
C 1.215337216 -0.0644166017 2.0916803974  
C 2.3973093359 0.0651650256 1.3625773832  
C 2.4229215411 0.1244172877 -0.0028744  
O -1.0836681895 -0.1400829344 -0.7653202423  
C 1.2637152921 -0.1126227242 3.4998748303  
C 0.2374457988 -0.2374114179 4.3694056529  
C 0.4765407635 -0.2632871679 5.775008682  
O -0.6704976425 -0.4088113649 6.5152531489  
O 1.0832686126 0.1014733426 -1.9836767743  
O 1.5204578521 -0.1752470896 6.3688644499  
H 2.2512683965 -0.0397840123 3.9467552332  
H -0.7872966165 -0.32688167 4.0445341442  
H -0.3456884798 -0.4185022401 7.4240039764  
H -0.6434640554 -0.0672322677 -1.6519768874  
H 3.3557600606 0.2227013928 -0.5401721323  
H 3.3316668018 0.1195012059 1.9092536319  
H -0.9427949063 -0.2433513444 1.8877731966

x+ 0.008

C 1.2586135367 0.0513624321 -0.7538407912  
C 0.0232085166 -0.0806506667 -0.0186948212  
C -0.0199621677 -0.133810393 1.3265224581  
C 1.172427534 -0.059710099 2.0836221647  
C 2.3680168104 0.0724493803 1.3935390662  
C 2.4277892106 0.1283289321 0.0253270381  
O -1.070894783 -0.1467782902 -0.790284579  
C 1.2114707405 -0.115842437 3.5008507105  
C 0.2130861487 -0.2396063251 4.3866352184  
C 0.5099449215 -0.2765890807 5.7916776683  
O -0.592299918 -0.3925070065 6.5486825992  
O 1.2001964313 0.0892854181 -2.0052871406  
O 1.6002325717 -0.2177615928 6.3241236115  
H 2.203083927 -0.0493056329 3.9391285748

H -0.8260423116 -0.3113371328 4.1035937176  
H -0.3047582054 -0.4023677235 7.4688724746  
H -0.7235429225 -0.0790199267 -1.7000952754  
H 3.3695896007 0.2351068459 -0.49792398  
H 3.2833559903 0.1341146401 1.9730177849  
H -0.9818646317 -0.2328433418 1.8123045005

y- 0.010

C 1.2496320232 -0.0066429147 -0.7423796732  
C 0.0203013667 -0.1001334765 0.0073876916  
C -0.0137682952 -0.096756568 1.3499429074  
C 1.1882936028 -0.0012385697 2.0917646766  
C 2.3763067468 0.150787156 1.3811038745  
C 2.4242243533 0.1608873587 0.0151495072  
O -1.0707272973 -0.2068137832 -0.7788243614  
C 1.2354534151 -0.1021791369 3.4984947273  
C 0.220735359 -0.2333577084 4.376895335  
C 0.4922774077 -0.3827390493 5.7709686472  
O -0.6260646156 -0.3265683782 6.5387153037  
O 1.1617710602 -0.0823429004 -1.9903677527  
O 1.5592997731 -0.5660093713 6.3150129711  
H 2.2284665432 -0.0817355575 3.9379521231  
H -0.8150910269 -0.1642235338 4.0827883295  
H -0.3077688235 -0.3101616082 7.4488844095  
H -0.6788035471 -0.1197087835 -1.6754763708  
H 3.3537851561 0.3173651246 -0.5146288203  
H 3.2927953224 0.2817584793 1.9452467374  
H -0.9694675241 -0.1576687792 1.8531407374

y+ 0.010

C 1.2422376746 0.1187251131 -0.740180995  
C 0.0197104167 -0.0613104957 0.0018129286  
C -0.0087948654 -0.177008486 1.341202158  
C 1.1928972543 -0.1237166797 2.0847102582  
C 2.3846956964 -0.0121122045 1.3788558912  
C 2.4280755667 0.0957285988 0.0144608559  
O -1.0786192238 -0.0841200513 -0.7800199262  
C 1.2300530797 -0.1295555056 3.5003716183  
C 0.2186781833 -0.2434440798 4.3784908507  
C 0.4786395272 -0.1615024372 5.785331262  
O -0.6006101602 -0.4713633147 6.5383662685  
O 1.1418893656 0.2772756811 -1.9823409238  
O 1.5077134326 0.1608317327 6.3367802823  
H 2.2150379521 -0.0140783023 3.9431145402

H -0.7952803927 -0.4588169101 4.0783561232  
H -0.2875530466 -0.5004268575 7.4502805431  
H -0.6887261448 -0.0344999587 -1.679036356  
H 3.3693294577 0.1426162686 -0.5162618232  
H 3.3118367593 -0.0288649072 1.9407223772  
H -0.9595595328 -0.3218392038 1.8367550668

y- 0.002

C 1.2438126905 0.0429393173 -0.7452842203  
C 0.0178632343 -0.0849132708 0.0043452747  
C -0.0125799136 -0.1294582343 1.3467876308  
C 1.1902200484 -0.0504723543 2.0883192521  
C 2.3793146272 0.0850699543 1.3795447981  
C 2.4246437939 0.1339020837 0.0132103562  
O -1.0742543549 -0.1565632989 -0.7822196398  
C 1.2347053522 -0.1125326684 3.4997258408  
C 0.2228704616 -0.237179227 4.3783358571  
C 0.4952957174 -0.292693295 5.7817626009  
O -0.6290814766 -0.3842608713 6.5359465343  
O 1.1460921902 0.0614116261 -1.9951966008  
O 1.5680791692 -0.2718875936 6.33997872  
H 2.2249909463 -0.0536883976 3.9418521533  
H -0.811682512 -0.2864925141 4.0763095596  
H -0.3186978563 -0.388788312 7.4491494701  
H -0.6769160966 -0.0827514316 -1.6785080967  
H 3.3611056842 0.247388057 -0.5154833442  
H 3.3019606991 0.1572553069 1.9442601383  
H -0.9660914044 -0.2237668765 1.8489347155

y+ 0.002

C 1.2424503912 0.0671820546 -0.7448821762  
C 0.0177045994 -0.0769535036 0.0032077428  
C -0.0117686782 -0.1443341453 1.3450306469  
C 1.1909636346 -0.0739859432 2.0869662325  
C 2.3809070018 0.0531308485 1.3791568045  
C 2.4254588176 0.120766653 0.0131365326  
O -1.0757858741 -0.1320988835 -0.7825601643  
C 1.2334072116 -0.1173177789 3.5000556652  
C 0.2223085942 -0.2394915872 4.3786680436  
C 0.492584845 -0.2488726658 5.7845107223  
O -0.6239050729 -0.4136581605 6.5360379238  
O 1.1424337456 0.1310513755 -1.9936403466  
O 1.5579131858 -0.1272087725 6.343971142  
H 2.2220208501 -0.0390534348 3.9429076512

H -0.8076321535 -0.3462091996 4.0756149746  
H -0.3142063496 -0.4278639414 7.4494129542  
H -0.678798423 -0.065821498 -1.6792895958  
H 3.3643242991 0.2118930302 -0.515737839  
H 3.305615867 0.0962002496 1.9435129676  
H -0.9643454918 -0.2548366971 1.845691118

y- 0.004

C 1.2448669142 0.0310967713 -0.7450252464  
C 0.0182174922 -0.0888749025 0.004991772  
C -0.0129212834 -0.1218572316 1.3476040842  
C 1.1897952025 -0.0386325406 2.0890849532  
C 2.3785342332 0.1013054999 1.3798556598  
C 2.4243663356 0.1410192513 0.0135074197  
O -1.0733789011 -0.1695248971 -0.7817503581  
C 1.2351169892 -0.110333542 3.4994741253  
C 0.2227158465 -0.2361188023 4.3780790866  
C 0.495615298 -0.3152060082 5.7797050613  
O -0.6300343188 -0.368123302 6.5363624881  
O 1.1489583983 0.0266048102 -1.9950006047  
O 1.5695703644 -0.3468337423 6.3357636335  
H 2.2261897372 -0.0615919865 3.941067034  
H -0.8132055648 -0.2556187474 4.0773173345  
H -0.3183879915 -0.3682627314 7.4491111943  
H -0.6766522792 -0.0922828545 -1.6779946587  
H 3.3593286647 0.2658164976 -0.5152478922  
H 3.2998749307 0.1881974843 1.9446158444  
H -0.9669190679 -0.2082610265 1.8502500692

y+ 0.004

C 1.2421151038 0.0793439846 -0.744232367  
C 0.0179185316 -0.0730933356 0.0027337223  
C -0.0112006511 -0.152069992 1.3441214056  
C 1.1913733857 -0.0858567513 2.0863567228  
C 2.3817641306 0.0371338379 1.3790417948  
C 2.4260037874 0.1141414084 0.0132730435  
O -1.076543304 -0.1198292048 -0.7823325721  
C 1.2326355075 -0.1197609247 3.5002031894  
C 0.2216847222 -0.2402203566 4.3787508223  
C 0.4901485359 -0.2268562821 5.785324708  
O -0.6196023974 -0.429099788 6.5363024498  
O 1.141508475 0.166206552 -1.9919247134  
O 1.5490093769 -0.0543761298 6.3441219697  
H 2.2203648455 -0.0319420295 3.9432272567

H -0.8050539025 -0.3748966795 4.0758366966  
H -0.3096598445 -0.4475797645 7.4495306269  
H -0.6805765296 -0.0573317692 -1.6794868069  
H 3.3657914221 0.1939499441 -0.5158656392  
H 3.3072951631 0.0654752737 1.943004752  
H -0.9633253582 -0.270819993 1.8437839381

y- 0.006

C 1.2461926435 0.0190355813 -0.7444792942  
C 0.0187519153 -0.092879475 0.0056623476  
C -0.0132549561 -0.1142304703 1.3483510717  
C 1.1892791951 -0.0267299993 2.0899026449  
C 2.3777150392 0.1176341759 1.3802444138  
C 2.4241795676 0.1480298816 0.0139518018  
O -1.0724326065 -0.1822312251 -0.7811541841  
C 1.2352977229 -0.1080732946 3.4991831163  
C 0.2222318573 -0.2352063437 4.3777757252  
C 0.4951788345 -0.3377306962 5.7772520066  
O -0.6296782693 -0.3523653115 6.5371319491  
O 1.1525284863 -0.0085399874 -1.9941777003  
O 1.5685511789 -0.4213967597 6.3300512806  
H 2.2270802137 -0.0691060228 3.9401544776  
H -0.8143537912 -0.2249147286 4.078767462  
H -0.3162133873 -0.3478321932 7.449210417  
H -0.6766632151 -0.1015071739 -1.6773780012  
H 3.3574795911 0.2839187975 -0.5149680348  
H 3.2975618254 0.2192602785 1.9449712905  
H -0.9677808452 -0.1926170335 1.8513182101

y+ 0.006

C 1.2419430939 0.0918360678 -0.7432530399  
C 0.018296247 -0.0690643006 0.0023751358  
C -0.0105446197 -0.1597515083 1.3432312557  
C 1.1918299975 -0.0978522256 2.085785745  
C 2.382673701 0.0209693414 1.3789357894  
C 2.4266019594 0.1076295537 0.0134873192  
O -1.077239199 -0.1077567566 -0.781836948  
C 1.2318355687 -0.1224230452 3.5003290245  
C 0.2208776676 -0.2409849347 4.3787395422  
C 0.4869328764 -0.204925469 5.7857736628  
O -0.61414481 -0.4446666454 6.5367303875  
O 1.1410177316 0.2018714667 -1.9895405653  
O 1.5374556738 0.0185065384 6.3430559612  
H 2.2186709537 -0.0252728432 3.943383297

H -0.8020918617 -0.4030932105 4.0763010583  
H -0.3036359029 -0.4668202996 7.4496991999  
H -0.6825931091 -0.0493793999 -1.6794497759  
H 3.3670927264 0.1761360982 -0.5160603169  
H 3.3088985085 0.034374375 1.9423396353  
H -0.962226203 -0.2868148027 1.8417446321

y- 0.008

C 1.2477898925 0.0064472032 -0.7436096204  
C 0.0194475749 -0.0965979534 0.0064497592  
C -0.0135486195 -0.1058167051 1.3491252194  
C 1.1887631293 -0.014240825 2.0907941553  
C 2.3769659548 0.1340953765 1.3806686196  
C 2.4241382432 0.1545993921 0.0145022839  
O -1.0715446348 -0.1946353362 -0.7801955004  
C 1.2353875374 -0.1053156796 3.4988606509  
C 0.2215579743 -0.2342593258 4.3773871404  
C 0.4940728014 -0.3601871651 5.7743480369  
O -0.6283027744 -0.3387894315 6.5379243781  
O 1.1568138603 -0.0448516876 -1.9926602021  
O 1.565102779 -0.4941091759 6.3231404555  
H 2.2278141841 -0.0757598617 3.9391161379  
H -0.8149947656 -0.194483313 4.080606656  
H -0.3126293028 -0.3286266435 7.4491499972  
H -0.6773716539 -0.1106806298 -1.676558425  
H 3.3556443726 0.301018124 -0.5147460851  
H 3.2951960355 0.2503756652 1.9451952286  
H -0.9686515883 -0.1756640279 1.852272114

y+ 0.008

C 1.2419810407 0.1049499857 -0.7419172333  
C 0.0188947263 -0.0651518521 0.0020777099  
C -0.009727069 -0.168079695 1.342270721  
C 1.1923611293 -0.1104873027 2.0852423539  
C 2.3836684859 0.0045566015 1.3788657181  
C 2.4272981925 0.101490314 0.0138754483  
O -1.0779487992 -0.0958192484 -0.7810380446  
C 1.2309991069 -0.1256938541 3.5003839702  
C 0.2198983439 -0.2421254532 4.3786507776  
C 0.483090649 -0.1831617012 5.785770136  
O -0.6078552161 -0.4586103318 6.5373944895  
O 1.1411427704 0.2388681461 -1.9863671665  
O 1.5236518487 0.0901315391 6.3406455585  
H 2.2169099644 -0.0192639078 3.9433505821



H -0.7987848107 -0.4312001807 4.0771353776  
H -0.2963114751 -0.4843426995 7.4499237522  
H -0.6853698009 -0.0416811305 -1.6792832824  
H 3.3682702869 0.1590168326 -0.5162084106  
H 3.3104326422 0.0029535561 1.9415690209  
H -0.9609510164 -0.3038316179 1.8394295216

**Optimized Structures of Gallic Acid and Caffeic acid and their radicals in different electric field along C-O direction at 6-311++G(3df,2p) basis set**

B3LYP Caffeic Acid (Neutral) -0.010 a.u.

C 1.2614275288 0.0495546367 -0.7238373737  
C 0.0410199894 -0.1011661243 -0.0646472201  
C 0.0091353733 -0.1684598151 1.316701601  
C 1.1901142044 -0.0864804379 2.0697731834  
C 2.4024404753 0.0616549887 1.3838369467  
C 2.4381731696 0.1293140902 -0.001847076  
O -1.1247002349 -0.1816798168 -0.7842126779  
C 1.2312762889 -0.1427477001 3.5295640979  
C 0.2151861102 -0.2340658162 4.3897995208  
C 0.5117496206 -0.2684231534 5.8505915765  
O -0.6171940853 -0.343093604 6.5719681065  
O 1.2152353523 0.1109929453 -2.1160820897  
O 1.6200175349 -0.2327225063 6.3155255337  
H 2.2213068237 -0.0975210793 3.971784472  
H -0.8250138836 -0.2805988051 4.0961636079  
H -0.3858736908 -0.3585162021 7.5149352026  
H 2.1033584817 0.2953802421 -2.4304016924  
H -0.900148832 -0.0860641714 -1.7149418136  
H 3.3854251227 0.2451019463 -0.5189653001  
H 3.3226442668 0.1269970231 1.947653158  
H -0.9504686159 -0.2837846405 1.8012222363

B3LYP Caffeic Acid (Neutral) -0.002 a.u.

C 1.2637766636 0.0535623215 -0.7196637166  
C 0.0444841951 -0.0787816869 -0.0411439335  
C 0.0321584338 -0.134674571 1.338497242  
C 1.225132545 -0.0605640238 2.0736566864  
C 2.4304626275 0.0714575075 1.3761077537  
C 2.4504033843 0.128166624 -0.0113886383  
O -1.1258282474 -0.1523943908 -0.7326122804  
C 1.2669004696 -0.1140387507 3.529361304  
C 0.2409605167 -0.2379855929 4.3800677395  
C 0.488064061 -0.2725371075 5.8320719211  
O -0.6695272897 -0.3994785942 6.5261045678  
O 1.1784113742 0.1007116739 -2.0897490879

O 1.5637871083 -0.2003606922 6.3747898998  
H 2.2543405925 -0.0438672069 3.9739116276  
H -0.7886430451 -0.3164277864 4.0608455548  
H -0.437451131 -0.4146417453 7.4656666723  
H 2.054550834 0.1962204035 -2.4727828084  
H -0.932281692 -0.0959978756 -1.6752651846  
H 3.3899431672 0.2311224579 -0.5419653433  
H 3.3595880406 0.1308477136 1.9263384493  
H -0.9241216081 -0.2366666775 1.8317355747

B3LYP Caffeic Acid (Neutral) -0.004 a.u.

C 1.2628604866 0.0529424454 -0.7203870556  
C 0.0435307284 -0.081360411 -0.0461515474  
C 0.0269555734 -0.1385075769 1.3340669571  
C 1.2172810561 -0.0637414054 2.0726463451  
C 2.4240815155 0.0700776354 1.3777850186  
C 2.4473489623 0.1280936596 -0.009468826  
O -1.1263015587 -0.1558538181 -0.7435682241  
C 1.2587882617 -0.1174643696 3.5300177015  
C 0.2352656421 -0.2386252736 4.381634747  
C 0.4933259061 -0.2723453681 5.8362867321  
O -0.6573139661 -0.3922378567 6.5359656499  
O 1.1865079908 0.1018748826 -2.0960920373  
O 1.5768570188 -0.2039255865 6.3606455016  
H 2.246326258 -0.0491788387 3.9745202871  
H -0.7964519111 -0.3144462168 4.0679041535  
H -0.4262753108 -0.4068639194 7.4765119112  
H 2.0678585103 0.2079921517 -2.4631790721  
H -0.9254018053 -0.0938401482 -1.6838155466  
H 3.3886533842 0.2326118009 -0.5372810111  
H 3.351330222 0.1301351139 1.9309005991  
H -0.9301159643 -0.2416649005 1.8256417164

B3LYP Caffeic Acid (Neutral) -0.006 a.u.

C 1.2620526514 0.0525051612 -0.7213545774  
C 0.0425143619 -0.0853836828 -0.0516706718  
C 0.0213420664 -0.1447588972 1.3290013034  
C 1.2088543095 -0.0685556831 2.0716960173  
C 2.4172883871 0.0684553257 1.3795862468  
C 2.4442081623 0.1287168306 -0.007304675  
O -1.1264373603 -0.1613568375 -0.7556849436  
C 1.250211923 -0.1229546856 3.5302784522  
C 0.2291357001 -0.2381955291 4.38381848  
C 0.4990938404 -0.2719127072 5.840859402  
O -0.644637062 -0.3811060321 6.546887393  
O 1.1952097206 0.1041783153 -2.1025871897

O 1.590655313 -0.2107559326 6.3462015684  
H 2.2383042414 -0.0593304015 3.9742683977  
H -0.8050727379 -0.3080265388 4.0760570908  
H -0.414244444 -0.3958460295 7.488365456  
H 2.0811007611 0.2249985066 -2.4531151302  
H -0.9178309331 -0.0920354275 -1.6932566135  
H 3.3873968345 0.2359052212 -0.5319776596  
H 3.3424874535 0.129662786 1.9358521897  
H -0.9365221886 -0.2505317624 1.8186634633

B3LYP Caffeic Acid (Neutral) -0.008 a.u.

C 1.2614942023 0.0516760578 -0.7225110187  
C 0.0415662938 -0.0913418801 -0.0578146509  
C 0.0152898258 -0.1538062875 1.3232571074  
C 1.1997001152 -0.0753611502 2.0707694383  
C 2.4100069784 0.0661752489 1.3815996973  
C 2.4410753681 0.1294641797 -0.0047642057  
O -1.1260348644 -0.169404418 -0.7691659757  
C 1.2409851197 -0.130664664 3.5301446225  
C 0.2224454958 -0.2369897441 4.3865607527  
C 0.5052831053 -0.2710376524 5.845623509  
O -0.6312168919 -0.3656328117 6.558935758  
O 1.2047602582 0.1072051191 -2.1092522261  
O 1.6051453051 -0.2205123018 6.3311410077  
H 2.229899885 -0.0740862116 3.973362227  
H -0.8145775817 -0.2979036937 4.0854784491  
H -0.4006671023 -0.380736094 7.5012023976  
H 2.0938319917 0.250088947 -2.4424165375  
H -0.9095471073 -0.0894338581 -1.7036587596  
H 3.3862523184 0.240298878 -0.5259108646  
H 3.3328684977 0.1290658525 1.9414256883  
H -0.9434502129 -0.2633915157 1.8105775841

B3LYP Gallic Acid (Neutral) -0.010 a.u.

C -0.9536690508 -1.1590007796 0.0021231493  
C -1.6932228027 0.0177789691 0.0002623774  
C -1.04647878 1.2486625022 -0.0040828109  
C 0.3410913489 1.3033270934 -0.0065997747  
C 1.0711469411 0.1173310076 -0.004766924  
C 0.4249172389 -1.1190495413 -0.0004158571  
O -3.0761705682 -0.0071803538 0.0027387284  
O -1.7831725756 2.4035341727 -0.0058455939  
C 2.5686744085 0.0817256136 -0.0072850089  
O 3.1210501217 1.3036092964 -0.0109846236  
O -1.6996182906 -2.322568372 0.0065600594  
O 3.1950268167 -0.944155675 -0.0066390829

H 1.0253746295 -2.0200394722 0.0009355378  
H 0.8412713464 2.2599958908 -0.0098828795  
H -1.1036236451 -3.0780586172 0.0084818964  
H -3.3330266959 -0.9363626207 0.006199855  
H -2.7143596434 2.1596522799 -0.0030098794  
H 4.0863502007 1.2020236061 -0.0124951688

B3LYP Gallic Acid (Neutral) -0.002 a.u.

C -0.9526340312 -1.1720785363 0.0022902417  
C -1.6925529298 0.0080698104 0.0004855384  
C -1.0418941063 1.2403321463 -0.0038856803  
C 0.3446754899 1.290643868 -0.0064788588  
C 1.0758510926 0.1039982469 -0.0046799625  
C 0.427728741 -1.1332054503 -0.0002815472  
O -3.0589800633 0.0046569587 0.0028840759  
O -1.7627220859 2.3944207623 -0.0056416434  
C 2.559520946 0.0906398164 -0.0073498886  
O 3.1046272985 1.3274943348 -0.0114243413  
O -1.7002724416 -2.3248885451 0.0066428573  
O 3.2337040737 -0.9101956776 -0.0061470515  
H 1.0188508379 -2.0393477673 0.0010562705  
H 0.8393250486 2.2494287903 -0.0098686631  
H -1.1230996899 -3.0938594147 0.0080408225  
H -3.3641228822 -0.9102802079 0.0058475991  
H -2.7015608263 2.1747774938 -0.0033424129  
H 4.0651165282 1.2106183712 -0.0128533558

B3LYP Gallic Acid (Neutral) -0.004 a.u.

C -0.9529711439 -1.1687712737 0.0022545243  
C -1.6926115893 0.0105000832 0.0004414809  
C -1.042933182 1.242281113 -0.0039305338  
C 0.3438776972 1.2936132502 -0.0065176669  
C 1.0744661498 0.1071427434 -0.0047173025  
C 0.4269711658 -1.1297384261 -0.0003222614  
O -3.0631460141 0.0018851562 0.0028651335  
O -1.7674285715 2.396686302 -0.0056858109  
C 2.5616340118 0.0883983336 -0.0073684942  
O 3.1082102844 1.3215981243 -0.0113102192  
O -1.7000314299 -2.3243359438 0.0066313587  
O 3.2239826379 -0.9186618095 -0.0062523049  
H 1.0202282818 -2.0346824092 0.0010149103  
H 0.8399693599 2.2518116931 -0.0098879452  
H -1.1179394129 -3.0898147616 0.0081466354  
H -3.3562072364 -0.9167947093 0.0059307063  
H -2.7044067257 2.1711663582 -0.0032704137  
H 4.0698967171 1.208941176 -0.0127277965

B3LYP Gallic Acid (Neutral) -0.006 a.u.

C -0.9532543089 -1.1654950513 0.0022153443  
C -1.6927427135 0.0129273396 0.000390994  
C -1.0440391968 1.2443204173 -0.0039782114  
C 0.3430165954 1.2967136753 -0.0065525469  
C 1.0732280217 0.1104067683 -0.0047468686  
C 0.4262498036 -1.1262309024 -0.0003595131  
O -3.0673927602 -0.0010122688 0.0028372481  
O -1.7723970063 2.3989638475 -0.005733898  
C 2.5638583084 0.0861675744 -0.0073692136  
O 3.1121304913 1.3156649382 -0.0111979569  
O -1.6998465487 -2.3237659682 0.0066150998  
O 3.2143109484 -0.9271413014 -0.006367266  
H 1.0217669545 -2.0299220153 0.0009789682  
H 0.8405144823 2.2543623004 -0.0098997313  
H -1.1129847934 -3.0858382672 0.0082549025  
H -3.3483893585 -0.9233129752 0.0060179089  
H -2.7074836136 2.167451521 -0.0031917791  
H 4.0750156943 1.2069653676 -0.0126194807

B3LYP Gallic Acid (Neutral) -0.008 a.u.

C -0.9534856562 -1.1622426302 0.0021715648  
C -1.6929446916 0.0153507749 0.0003305597  
C -1.0452241122 1.2464465108 -0.004028293  
C 0.34208655 1.2999571512 -0.0065769904  
C 1.0721197996 0.1138082609 -0.0047596123  
C 0.4255682247 -1.1226690232 -0.0003886884  
O -3.0717371432 -0.0040308801 0.0027921543  
O -1.7776480416 2.401247909 -0.0057874459  
C 2.5662147799 0.0839426795 -0.0073349675  
O 3.1164186992 1.3096590862 -0.0110910992  
O -1.699714119 -2.3231766895 0.0065897943  
O 3.2046628865 -0.9356509531 -0.0065005293  
H 1.0234880208 -2.0250411487 0.0009548775  
H 0.8409411655 2.2570997322 -0.0098938076  
H -1.1082177371 -3.0819202717 0.0083678223  
H -3.3406698124 -0.9298344595 0.0061046501  
H -2.7108074443 2.1636091463 -0.003105914  
H 4.0805096315 1.204669805 -0.0125500754

B3LYP Caffeic Acid (Radical) -0.010 a.u.

C 1.2591787139 0.0545812515 -0.770716898  
C 0.0042327218 -0.0812537214 -0.02632271  
C -0.037497104 -0.1362649002 1.3385229319  
C 1.1655118852 -0.06020889 2.0789709824

C 2.4028984231 0.0764193575 1.3697042451  
C 2.4598120976 0.1324454259 0.0098141038  
O -1.0966128779 -0.1486318146 -0.7961759192  
C 1.2315702092 -0.1136817022 3.5101694249  
C 0.2092475451 -0.2393210417 4.3858955193  
C 0.512925836 -0.2785659033 5.8463619771  
O -0.6067824637 -0.3902575543 6.5683147563  
O 1.2002004576 0.0929202538 -2.0254112002  
O 1.6285821483 -0.2174563887 6.2906633591  
H 2.2196689402 -0.0468040856 3.9533218326  
H -0.8286729544 -0.3142355747 4.0910693095  
H -0.3814396135 -0.4097119087 7.5133914243  
H -0.7435186526 -0.0824060718 -1.7049018215  
H 3.4008808465 0.236667021 -0.5134384403  
H 3.3117438172 0.1359572292 1.9540747266  
H -0.9902779756 -0.2376719818 1.8384653963

B3LYP Caffeic Acid (Radical) -0.002 a.u.

C 1.2535049642 0.055493705 -0.7697511544  
C 0.0006458446 -0.0812089536 -0.0111474647  
C -0.0176962644 -0.1365609918 1.3581779585  
C 1.192584707 -0.0605741911 2.0745208272  
C 2.4249008242 0.0742772719 1.3569524267  
C 2.4691349943 0.1310487176 -0.0012677032  
O -1.1084258418 -0.1478053323 -0.7472026971  
C 1.261831727 -0.1119030482 3.5118035102  
C 0.2354044048 -0.2373255411 4.3763415616  
C 0.4951631943 -0.2732256109 5.8292497129  
O -0.6538972604 -0.4019506911 6.5290003092  
O 1.1827486356 0.0974593275 -2.0110947478  
O 1.5801336336 -0.1998401991 6.3504538105  
H 2.2520671161 -0.0419382651 3.9488860006  
H -0.7959082461 -0.3157514118 4.0633546931  
H -0.422529685 -0.4190658143 7.4691058951  
H -0.8036825326 -0.0854913756 -1.6741640324  
H 3.4004312979 0.2332593397 -0.5409062936  
H 3.3403101308 0.1316740941 1.9315871743  
H -0.9650696444 -0.2380520297 1.8678732133

B3LYP Caffeic Acid (Radical) -0.004 a.u.

C 1.2543720243 0.0549771464 -0.7697184259  
C 0.001466998 -0.0812209543 -0.0139036504  
C -0.0217084729 -0.1365499418 1.3543650673  
C 1.1870678703 -0.0606775694 2.0754868036  
C 2.4202344205 0.0746137323 1.3595392743  
C 2.4668353966 0.1313014089 0.0009300753

O -1.1061298405 -0.1479264569 -0.7573401889  
C 1.2557339341 -0.1125001036 3.5120006583  
C 0.2300938755 -0.2377105775 4.3776739496  
C 0.499069751 -0.2741567691 5.8332281004  
O -0.6437719215 -0.3996408836 6.5366272159  
O 1.1856485281 0.0967789142 -2.0141226561  
O 1.5910926957 -0.2029796912 6.3368825117  
H 2.2454107074 -0.0433077787 3.9505480558  
H -0.8026224619 -0.3151276147 4.0683168323  
H -0.4155158772 -0.4172671772 7.4782576297  
H -0.7900193816 -0.0848814723 -1.6801871724  
H 3.4001893305 0.2341877491 -0.5352458363  
H 3.3342872668 0.1325732725 1.9361549429  
H -0.9700828433 -0.2379662331 1.862279813

B3LYP Caffeic Acid (Radical) -0.006 a.u.

C 1.2555371198 0.0553139163 -0.7697628982  
C 0.002352072 -0.0811809924 -0.0173029463  
C -0.0263493146 -0.1365238476 1.3498589441  
C 1.1807162138 -0.0604995877 2.0765775327  
C 2.4150203129 0.0751489991 1.3625609989  
C 2.464531122 0.1316637224 0.0035819069  
O -1.1032918189 -0.1480623667 -0.768935824  
C 1.2486957231 -0.1128931813 3.5117731198  
C 0.2239894573 -0.2383027715 4.3796324054  
C 0.5032779903 -0.2754873874 5.8372369286  
O -0.6326093515 -0.3972286253 6.5457271898  
O 1.1894722357 0.0948176803 -2.0174159606  
O 1.6027289708 -0.2063978581 6.3224740335  
H 2.2378067638 -0.0443305922 3.951817664  
H -0.8102751207 -0.31500163 4.0745524889  
H -0.4061613431 -0.4151546168 7.4886569214  
H -0.775584077 -0.0835011147 -1.6874548802  
H 3.4002005882 0.2347016122 -0.5287735719  
H 3.3275433428 0.1334479415 1.9414476028  
H -0.9759488867 -0.2380103 1.8555213444

B3LYP Caffeic Acid (Radical) -0.008 a.u.

C 1.2571164768 0.0551281207 -0.7701082179  
C 0.0032533589 -0.0811546866 -0.0214070873  
C -0.0315725275 -0.1363841456 1.3446336632  
C 1.1735875279 -0.0603610132 2.0777687446  
C 2.4093280637 0.0756672776 1.3659029851  
C 2.4622240832 0.1319547081 0.0065052377  
O -1.1001606456 -0.1482115064 -0.7817963142  
C 1.2407718482 -0.1132704729 3.5111788612

C 0.2171558104 -0.2387418952 4.3823840779  
C 0.5079023625 -0.2767998578 5.8416686521  
O -0.6204237277 -0.3946077447 6.5561679116  
O 1.1942296163 0.0935082704 -2.0211659492  
O 1.6151156909 -0.2104678077 6.3073223346  
H 2.2294025794 -0.0454914503 3.9526748813  
H -0.8188295269 -0.3145499625 4.0820477109  
H -0.3950679764 -0.4130792893 7.5002655031  
H -0.7602906631 -0.0826440654 -1.6956881029  
H 3.4004413608 0.2353971657 -0.5216060765  
H 3.3201235392 0.1344490289 1.9473807304  
H -0.9826552509 -0.2378216738 1.8476434545

B3LYP Gallic Acid (Radical) -0.010 a.u.

C -0.9500243657 -1.2062215822 0.0031960193  
C -1.7539559983 0.0018766905 0.0014324274  
C -1.0211931757 1.2684541601 -0.0034176969  
C 0.3515568454 1.3303738204 -0.0064535099  
C 1.0659701263 0.1266689083 -0.0047918236  
C 0.4164400012 -1.1239042705 0.0000055141  
O -3.0058070922 0.0326931049 0.0039164315  
O -1.7991045362 2.3600392319 -0.0047466855  
C 2.5663050192 0.0832918548 -0.0080812037  
O 3.1206349185 1.3008262556 -0.0116986577  
O -1.6344320068 -2.3739832607 0.008027211  
O 3.1785165053 -0.9508766682 -0.0073055028  
H 1.0391204097 -2.0103403319 0.0011282653  
H 0.8674183064 2.2784310964 -0.0100296267  
H -1.0043593687 -3.1041250826 0.0092965492  
H -2.7089747651 2.0059153031 -0.001821054  
H 4.0869811765 1.20400377 -0.0133616569

B3LYP Gallic Acid (Radical) -0.002 a.u.

C -0.9486269717 -1.2162941804 0.003223642  
C -1.7526517621 -0.0022806698 0.0015643397  
C -1.0194788605 1.2655249922 -0.0033669064  
C 0.3551364816 1.3196086692 -0.006403246  
C 1.0675964617 0.1149981385 -0.0046715783  
C 0.420291293 -1.1367093233 0.0000950994  
O -2.9948512268 0.0249434759 0.0040545832  
O -1.7790357886 2.3605442882 -0.0047394003  
C 2.556157952 0.0910399987 -0.0078202819  
O 3.1060213103 1.3218104488 -0.0121610016  
O -1.6420286134 -2.3694235306 0.0078869985  
O 3.2137210511 -0.9196585139 -0.0066309705  
H 1.0345367472 -2.0279186862 0.0012428419



H 0.8675423782 2.2688248184 -0.0100455559  
H -1.0348923013 -3.1179576992 0.0088506539  
H -2.7015391752 2.0388566032 -0.0019362245  
H 4.0671930245 1.2072141705 -0.0138479933

B3LYP Gallic Acid (Radical) -0.004 a.u.

C -0.9490411951 -1.2137042465 0.0032135117  
C -1.7528475105 -0.0011699015 0.0015225675  
C -1.0197822766 1.266171537 -0.0033773367  
C 0.354363676 1.3221163081 -0.0064077417  
C 1.0669451932 0.1177491838 -0.004693633  
C 0.4192807464 -1.1335075664 0.0000744727  
O -2.9973941304 0.0271196355 0.0040114105  
O -1.7837725743 2.3604146167 -0.0047394702  
C 2.5585754674 0.0890205567 -0.0078652949  
O 3.1092023979 1.3165399734 -0.0120524859  
O -1.640062954 -2.3705687902 0.0079165684  
O 3.2048577633 -0.9275031824 -0.0067986345  
H 1.0354721369 -2.0235931372 0.0012197907  
H 0.8676921029 2.2709790253 -0.0100268333  
H -1.0268941697 -3.1143462275 0.0089626542  
H -2.7031726786 2.0305702742 -0.0019128893  
H 4.0716700053 1.2068349409 -0.0137516561

B3LYP Gallic Acid (Radical) -0.006 a.u.

C -0.9494101949 -1.2111562919 0.0032052792  
C -1.7531321891 -0.0001059486 0.0014831079  
C -1.0201664276 1.2668827725 -0.0033890108  
C 0.3535073411 1.3247587791 -0.0064128274  
C 1.0664527749 0.1206226793 -0.0047150937  
C 0.4182984475 -1.1302951323 0.0000558077  
O -3.0000642555 0.0291591996 0.0039701929  
O -1.7887229822 2.3602791802 -0.0047424039  
C 2.5610950654 0.0870367842 -0.0079138443  
O 3.1127077627 1.3112547439 -0.0119355829  
O -1.6381363923 -2.3717142443 0.0079486  
O 3.1960159235 -0.9353620887 -0.0069824965  
H 1.0365523853 -2.0192062339 0.0011968961  
H 0.867722492 2.2733093909 -0.0100101787  
H -1.0191181945 -3.1108236194 0.0090771002  
H -2.7049806734 2.0222903635 -0.0018917702  
H 4.0764711171 1.2061926659 -0.0136487755

B3LYP Gallic Acid (Radical) -0.008 a.u.

C -0.9497359163 -1.2086388021 0.0031975067  
C -1.75349724 0.0009119157 0.0014449383

C -1.0206377716 1.2676477304 -0.0034008852  
C 0.3525622981 1.3275326744 -0.0064173697  
C 1.0661155143 0.1236226322 -0.0047356333  
C 0.417345909 -1.1270636375 0.0000386537  
O -3.0028657975 0.0310560263 0.0039319941  
O -1.7938886978 2.3601325258 -0.004746288  
C 2.563708519 0.0850988667 -0.0079638606  
O 3.116549904 1.3059472571 -0.0118184816  
O -1.6362405581 -2.3728564925 0.0079809039  
O 3.1871733703 -0.9432223439 -0.0071708121  
H 1.0377794907 -2.0147464446 0.001174734  
H 0.8676196335 2.275814675 -0.0099940215  
H -1.0115448786 -3.1073796059 0.0091905394  
H -2.7069626036 2.0140155014 -0.0018720943  
H 4.0816108247 1.2052505215 -0.0135448237

B3LYP Caffeic Acid (Neutral) Zero field

C 1.2649426796 0.0535005171 -0.7191477218  
C 0.0453252641 -0.0771983356 -0.0367574951  
C 0.0366732381 -0.1318818228 1.3423259677  
C 1.2320397008 -0.0581800234 2.0747450155  
C 2.4362813208 0.072338429 1.374615639  
C 2.4535330515 0.1276969255 -0.0129182478  
O -1.1250240286 -0.1501706336 -0.7229371714  
C 1.2742132765 -0.1112150375 3.5283189403  
C 0.246084259 -0.2373545991 4.3790808048  
C 0.4831700406 -0.2724687018 5.8279255484  
O -0.6808918755 -0.4050476565 6.5174747165  
O 1.1714243575 0.0987945616 -2.0835920184  
O 1.5514430693 -0.1973972433 6.3882913638  
H 2.2616522117 -0.0394666083 3.9727584891  
H -0.7816154059 -0.3180710824 4.0550376362  
H -0.44652805 -0.4205632406 7.4557827059  
H 2.0416079432 0.1901196713 -2.4819198985  
H -0.9386655273 -0.0972740412 -1.6677771896  
H 3.3914804386 0.2290806305 -0.5459663072  
H 3.3669823901 0.1312306105 1.9224315892  
H -0.919017354 -0.2328003192 1.8368116336

B3LYP Caffeic Acid (Neutral) 0.010 a.u.

C 1.2728817279 0.052995373 -0.7209004986  
C 0.045595684 -0.0720223255 -0.0235351956  
C 0.0481606348 -0.1223115561 1.3523128022  
C 1.2530840671 -0.0495054638 2.0817449529  
C 2.4576647931 0.0764624596 1.3682140141

C 2.4698927039 0.1264588938 -0.0161699325  
O -1.119279866 -0.1419686244 -0.6929501046  
C 1.3007970422 -0.1007372578 3.5174232618  
C 0.2645818079 -0.2341028174 4.3842806567  
C 0.4648473305 -0.2722472617 5.8109479925  
O -0.7281044564 -0.4238662155 6.4942494891  
O 1.1505890793 0.0910325132 -2.0561476919  
O 1.5005641179 -0.190307775 6.4527015609  
H 2.2909404123 -0.0247210283 3.956680475  
H -0.7564210908 -0.3227053721 4.0434125115  
H -0.465992478 -0.4421990209 7.4224891571  
H 1.9904950836 0.1686670171 -2.5245308937  
H -0.9641409246 -0.1016313085 -1.6472295786  
H 3.4026569279 0.2222078928 -0.5572538034  
H 3.3929506262 0.1339706608 1.9096816866  
H -0.9066522228 -0.2197967831 1.8491631385

B3LYP Caffeic Acid (Neutral) 0.002 a.u.

C 1.2663146225 0.053135087 -0.7188393373  
C 0.045937951 -0.0752913371 -0.0329172736  
C 0.0402926495 -0.1284166635 1.3455770552  
C 1.237895512 -0.0553502129 2.075943689  
C 2.4414807194 0.0732334874 1.3732967162  
C 2.4567209383 0.1268165751 -0.0141210732  
O -1.1241280951 -0.1472701273 -0.7145507397  
C 1.2806218279 -0.107781286 3.5269223808  
C 0.2506249594 -0.2371860291 4.3786725854  
C 0.4787554696 -0.2724242081 5.8238910029  
O -0.6912461492 -0.4117062411 6.5101193316  
O 1.1654440248 0.0963652856 -2.0776872754  
O 1.5397418601 -0.193533368 6.4013577209  
H 2.2680624868 -0.0334526602 3.9710795974  
H -0.7752258398 -0.3214621885 4.0504313863  
H -0.4533377951 -0.4272241034 7.4469063413  
H 2.0297171204 0.1829702718 -2.4908409898  
H -0.9443960156 -0.0979254132 -1.6614540284  
H 3.3933248219 0.2262654294 -0.5492989803  
H 3.3735274807 0.1315573969 1.9190815174  
H -0.9150175494 -0.2276476948 1.8410143733

B3LYP Caffeic Acid (Neutral) 0.004 a.u.

C 1.267755989 0.0531668053 -0.7188261107  
C 0.0463339467 -0.0743229547 -0.029679826  
C 0.0433840091 -0.1266584168 1.3481898114  
C 1.2430343373 -0.0536617186 2.0772215479  
C 2.4462421439 0.0741199701 1.3720193373

C 2.4598791861 0.1267530865 -0.0150410541  
O -1.1230004131 -0.1459083271 -0.7073107759  
C 1.2865467908 -0.1058336174 3.5251047264  
C 0.2547253047 -0.2361855015 4.3789659682  
C 0.4747134952 -0.2723339753 5.8202226244  
O -0.701173876 -0.4152762476 6.504060678  
O 1.1602794833 0.0949677721 -2.0719330217  
O 1.5289156113 -0.1925352756 6.4142025916  
H 2.274412889 -0.0311180669 3.9685135152  
H -0.7696688144 -0.3214043146 4.0469702493  
H -0.4590144261 -0.4315479987 7.4391621127  
H 2.0184526331 0.1787175595 -2.4994750429  
H -0.9497647779 -0.0991878958 -1.6561631886  
H 3.3952364665 0.2251818177 -0.552078478  
H 3.3794120341 0.1321884855 1.9161516633  
H -0.9115910125 -0.2254491861 1.8443066723

B3LYP Caffeic Acid (Neutral) 0.006 a.u.

C 1.2693317694 0.0531526024 -0.7191243942  
C 0.0464292118 -0.0735606038 -0.0270129545  
C 0.0457850822 -0.1251779338 1.3502415137  
C 1.2473409657 -0.0521824341 2.0786471463  
C 2.4505558805 0.0749573989 1.3707998555  
C 2.4631189995 0.1267096824 -0.0156563706  
O -1.1217574059 -0.1447632432 -0.7012476637  
C 1.2919294101 -0.1040631192 3.522937494  
C 0.2584746343 -0.2351538597 4.3799877041  
C 0.4710019614 -0.2722012774 5.8168365513  
O -0.7106058282 -0.4182991206 6.4991600253  
O 1.1560281284 0.0935790469 -2.0663400532  
O 1.518781265 -0.1919684078 6.4269957541  
H 2.2804276398 -0.0291279199 3.9652526561  
H -0.7646588941 -0.3211521114 4.0446452015  
H -0.4631615055 -0.4354502161 7.4323186742  
H 2.0079905944 0.1752562208 -2.507978488  
H -0.9549442406 -0.100295543 -1.6520023229  
H 3.3974038529 0.2242199443 -0.5543067905  
H 3.3846455771 0.1328254371 1.913654121  
H -0.9090060981 -0.223632543 1.8467763402

B3LYP Caffeic Acid (Neutral) 0.008 a.u.

C 1.2710380501 0.0530657823 -0.7197556912  
C 0.0462242919 -0.0727709983 -0.0249249451  
C 0.0473962072 -0.1236581948 1.351659277  
C 1.2507224363 -0.0507331791 2.0801342519  
C 2.4543741221 0.075754934 1.3695357265

C 2.4664577566 0.1265848975 -0.016050613  
O -1.1205025283 -0.1434486508 -0.69636441  
C 1.2966853312 -0.1022787616 3.5203650976  
C 0.2617776394 -0.234407027 4.3816913419  
C 0.4676728638 -0.2720941519 5.8137233705  
O -0.7195015403 -0.4212835901 6.4957651328  
O 1.152749819 0.0921966153 -2.0610417715  
O 1.5092595665 -0.191271641 6.4398039234  
H 2.2859335738 -0.0268609139 3.9612797216  
H -0.7602185958 -0.3215888409 4.043450882  
H -0.4655730901 -0.4391732013 7.4266791389  
H 1.9986015585 0.1717928093 -2.5163050223  
H -0.9596920601 -0.1011086866 -1.6489187776  
H 3.3998672352 0.2231635378 -0.5560396221  
H 3.3891744647 0.1334261998 1.9114735986  
H -0.9073361017 -0.2216349385 1.8484233903

B3LYP Gallic Acid (Neutral) Zero field

C -0.9522419751 -1.175419272 0.0023229757  
C -1.6925686124 0.0056393041 0.0005251241  
C -1.0409190229 1.2384782726 -0.0038449819  
C 0.3454090838 1.2878056329 -0.0064421159  
C 1.0773906039 0.1009716811 -0.004642706  
C 0.428519632 -1.1366342271 -0.0002415641  
O -3.0548945661 0.0072942569 0.0028999025  
O -1.7582743423 2.3921760551 -0.0056015798  
C 2.5575244348 0.0928839527 -0.0073273887  
O 3.101377338 1.3333552589 -0.0115336489  
O -1.7005751842 -2.3254220354 0.0066530506  
O 3.2434877186 -0.9017568874 -0.0060483666  
H 1.0176215362 -2.043927983 0.0010973663  
H 0.8385832593 2.2472129818 -0.0098505362  
H -1.1284736778 -3.0979708449 0.0079385215  
H -3.3721298451 -0.9037841147 0.0057738246  
H -2.6989464833 2.178298106 -0.0034069394  
H 4.0606711027 1.2120248625 -0.0129769379

B3LYP Gallic Acid (Neutral) 0.010 a.u.

C -0.9493485317 -1.1928384391 0.0024824591  
C -1.6938867925 -0.006398211 0.0006945132  
C -1.0367769414 1.230893724 -0.0036940707  
C 0.3480237895 1.2753721817 -0.0063025821  
C 1.0878495326 0.0873518227 -0.0044720138  
C 0.4327154609 -1.1534114669 -0.0000342525  
O -3.0353229164 0.0179379745 0.002974406

O -1.7395152018 2.3815726674 -0.0054647692  
C 2.5488951073 0.1039924085 -0.007201369  
O 3.0898031153 1.3631654076 -0.0119645606  
O -1.7031798431 -2.3276869808 0.0067584228  
O 3.2939313507 -0.8598506677 -0.0056978303  
H 1.0130915807 -2.0659774246 0.0013269113  
H 0.8336966853 2.2382317881 -0.0098185167  
H -1.1592772471 -3.1196285169 0.0073698945  
H -3.4130061276 -0.8722223942 0.0055294544  
H -2.6889904973 2.1953210662 -0.0036734446  
H 4.0428584764 1.2154000606 -0.013518652

B3LYP Gallic Acid (Neutral) 0.002 a.u.

C -0.9517957799 -1.1788054623 0.0023547215  
C -1.6926764301 0.0032052291 0.0005625662  
C -1.0399988362 1.2367227002 -0.0038082877  
C 0.3460807577 1.285080213 -0.0064096846  
C 1.0791110025 0.0980493285 -0.0046083879  
C 0.4293380152 -1.1400249593 -0.000202661  
O -3.0508745841 0.0097786356 0.0029165822  
O -1.7540585112 2.3899539813 -0.0055653888  
C 2.555648545 0.0951055131 -0.0073073698  
O 3.0984445883 1.3392205642 -0.0116358444  
O -1.7009276669 -2.325936415 0.0066659043  
O 3.2533697619 -0.8933402363 -0.0059550107  
H 1.0164916999 -2.0484556968 0.0011379545  
H 0.8377385261 2.245152478 -0.0098378355  
H -1.1340739864 -3.1021630226 0.007834829  
H -3.3802504617 -0.8973114543 0.0057093858  
H -2.696546348 2.1817825635 -0.0034658656  
H 4.0565407079 1.2132110402 -0.0130916076

B3LYP Gallic Acid (Neutral) 0.004 a.u.

C -0.9512774365 -1.1822430321 0.0023860669  
C -1.692856463 0.0007795186 0.0005973044  
C -1.0391061116 1.2350854724 -0.003774124  
C 0.3467039183 1.2824711937 -0.0063765626  
C 1.0810272272 0.095218303 -0.0045704152  
C 0.4301838088 -1.1433987344 -0.0001608237  
O -3.046897735 0.0120972134 0.0029298921  
O -1.7500560698 2.3877795101 -0.0055327178  
C 2.5538359694 0.0973249696 -0.0072787944  
O 3.0957584538 1.3451569498 -0.0117347043  
O -1.7013458185 -2.3264327497 0.006679824  
O 3.2633415652 -0.8849379443 -0.0058733616  
H 1.015476668 -2.0529405295 0.0011830654

H 0.836849257 2.2432293109 -0.0098239919  
H -1.1399417788 -3.1064529403 0.0077278714  
H -3.3884337302 -0.890889172 0.0056493393  
H -2.6943370436 2.1852372466 -0.0035223623  
H 4.0526363194 1.2141404143 -0.0132115058

B3LYP Gallic Acid (Neutral) 0.006 a.u.

C -0.9506937675 -1.1857409528 0.0024187716  
C -1.6931302425 -0.0016263983 0.0006255834  
C -1.0382398114 1.233586022 -0.0037335528  
C 0.3472717288 1.2799747271 -0.0063154271  
C 1.0831551548 0.0924678257 -0.0044931699  
C 0.4310399293 -1.1467645372 -0.0000957383  
O -3.0429579529 0.014247137 0.0029182006  
O -1.7462503681 2.385668507 -0.0055001717  
C 2.5520786262 0.0995225416 -0.0071822301  
O 3.0932942326 1.3512077119 -0.0118635027  
O -1.7018473757 -2.3268937087 0.0066835617  
O 3.2734164377 -0.8765760274 -0.0058215438  
H 1.0145450589 -2.0574094001 0.0012587178  
H 0.8359232503 2.2414435144 -0.0097720746  
H -1.1460868761 -3.1108144625 0.0076079939  
H -3.3966012562 -0.8845447004 0.0055626199  
H -2.6922863776 2.188634363 -0.0035874939  
H 4.0489306094 1.2148428375 -0.013416544

B3LYP Gallic Acid (Neutral) 0.008 a.u.

C -0.9500414387 -1.1892922041 0.0024563992  
C -1.6935236119 -0.0039954217 0.0006422948  
C -1.0374192889 1.2322564443 -0.0036722096  
C 0.3477553211 1.2776081551 -0.0061837025  
C 1.085509912 0.0898165723 -0.0043210978  
C 0.4318888666 -1.1501035263 0.0000247698  
O -3.0390885208 0.0161783142 0.002848992  
O -1.7427104005 2.3836458775 -0.0054621532  
C 2.5503773445 0.101690843 -0.0069296047  
O 3.09117156 1.3573815655 -0.0120776081  
O -1.7024522903 -2.327303792 0.0066605994  
O 3.2836359292 -0.8682594624 -0.0058262145  
H 1.0136839166 -2.0618450938 0.0014050608  
H 0.8349480769 2.239810959 -0.0096259593  
H -1.1525323326 -3.1152370111 0.0074575403  
H -3.4047191392 -0.8783658168 0.005401199  
H -2.69046427 2.1919956806 -0.0036783054  
H 4.0455413661 1.2152429167 -0.0138260003

B3LYP Caffeic Acid (Radical) Zero field

C 1.253007645 0.0559668079 -0.7700519263  
C -0.0002284189 -0.0811273944 -0.0088966136  
C -0.014331523 -0.1363865913 1.3613874605  
C 1.1973283988 -0.0603607772 2.0737544223  
C 2.4291583194 0.0739624394 1.3546957936  
C 2.4715302467 0.1306891052 -0.0030557145  
O -1.1103304608 -0.1475308 -0.7383538197  
C 1.267145843 -0.1111817916 3.5111560604  
C 0.2400373668 -0.2371823729 4.3755722817  
C 0.4917301395 -0.2726183487 5.8254624758  
O -0.663141069 -0.4042987155 6.5225637374  
O 1.1804956162 0.0979963503 -2.0082913224  
O 1.5699013538 -0.1966587543 6.363457951  
H 2.2580173799 -0.0402500099 3.946688357  
H -0.7900372067 -0.3169253512 4.0595189139  
H -0.427844803 -0.4206414865 7.4610180312  
H -0.8166085543 -0.0860305041 -1.6692220744  
H 3.4010102197 0.2321176938 -0.5458344328  
H 3.3457518897 0.1307778826 1.9276726582  
H -0.9609403827 -0.2377983814 1.8725307606

B3LYP Caffeic Acid (Radical) 0.010 a.u.

C 1.2563699804 0.0565816184 -0.7760961344  
C -0.0057989768 -0.0812156399 -0.0065099082  
C -0.0079644912 -0.1354154872 1.3685405805  
C 1.2082507887 -0.0595549859 2.0720715434  
C 2.443912777 0.0729905095 1.3453064266  
C 2.4854847089 0.1292052589 -0.0083137302  
O -1.1148060908 -0.1468948229 -0.7115833744  
C 1.2831596197 -0.1074402638 3.5018127387  
C 0.2545843328 -0.2349854955 4.3824023578  
C 0.4785458589 -0.268793603 5.8107416966  
O -0.6996817583 -0.4126480597 6.5113059086  
O 1.1820990363 0.1033514358 -1.9994907366  
O 1.5292707845 -0.1887635753 6.4228586142  
H 2.2786012202 -0.033634876 3.9270478697  
H -0.771693941 -0.3197592606 4.0573618996  
H -0.4282156129 -0.428646694 7.4370802989  
H -0.8687868577 -0.0909858496 -1.6591839518  
H 3.4092276249 0.2279296935 -0.561400781  
H 3.3627223261 0.1274887601 1.9159437294  
H -0.9536293297 -0.2362896626 1.8818779525

B3LYP Caffeic Acid (Radical) 0.002 a.u.

C 1.2528644246 0.0565270783 -0.7705646413



C -0.0011703693 -0.0811650462 -0.0073556075  
C -0.0116325051 -0.1363327268 1.3639311534  
C 1.2012454819 -0.0601451579 2.0730872483  
C 2.4329641783 0.0737474299 1.3525933144  
C 2.4739915532 0.1304430035 -0.0046754746  
O -1.1120203819 -0.1475290714 -0.7305445682  
C 1.2716888291 -0.1104261246 3.5100943459  
C 0.2440675048 -0.2365761619 4.3756157327  
C 0.4884267085 -0.2716420517 5.8220083206  
O -0.6716572997 -0.4063332737 6.5176033694  
O 1.1795331782 0.098595083 -2.0059700041  
O 1.5603318743 -0.1945233867 6.3758912634  
H 2.2632723354 -0.0389048189 3.9439608337  
H -0.7849184929 -0.3171910347 4.0568244417  
H -0.4312793253 -0.4225853206 7.4540808841  
H -0.8287559002 -0.0867603607 -1.6650528147  
H 3.4018641754 0.2311423029 -0.5502023857  
H 3.3504828398 0.1300103439 1.924297296  
H -0.9576468089 -0.2378317058 1.8761502926

B3LYP Caffeic Acid (Radical) 0.004 a.u.

C 1.2530851645 0.0570747396 -0.7713824348  
C -0.0022174888 -0.0811707617 -0.0062665976  
C -0.0096212424 -0.1361742544 1.3659547375  
C 1.2043597433 -0.0598795773 2.0726376684  
C 2.4363981308 0.0735579866 1.35070326  
C 2.476618584 0.1301447155 -0.0059212954  
O -1.1133163083 -0.1474278243 -0.7239466323  
C 1.2755716372 -0.109612358 3.508578234  
C 0.2475172355 -0.2361808724 4.3762249611  
C 0.4855169698 -0.2709284824 5.8186897426  
O -0.6795428152 -0.408279352 6.5138456646  
O 1.1791253662 0.0991529261 -2.0038590421  
O 1.5514559649 -0.1924691998 6.3879711983  
H 2.2679725837 -0.0373796586 3.9406154932  
H -0.7805464843 -0.317888877 4.0551775048  
H -0.4330807603 -0.4242505244 7.4481447252  
H -0.840141124 -0.0874404885 -1.6619279663  
H 3.4031062303 0.2300673387 -0.553916617  
H 3.3546466813 0.1292605049 1.9214985388  
H -0.9552560682 -0.2376569806 1.8789518571

B3LYP Caffeic Acid (Radical) 0.006 a.u.

C 1.253869787 0.0565013219 -0.7724742636  
C -0.0032841465 -0.0811367912 -0.0057722356  
C -0.0085265979 -0.1357628482 1.3672779172

C 1.2063543424 -0.059730952 2.072379206  
C 2.4391875783 0.0733041007 1.3489776962  
C 2.4793795167 0.1296772999 -0.0068153797  
O -1.1141367653 -0.1471141373 -0.7189363375  
C 1.2785616365 -0.1088071406 3.5066707642  
C 0.2501854158 -0.2357652246 4.3775799869  
C 0.483042659 -0.2701082293 5.8156776562  
O -0.6864973864 -0.4101035932 6.5116853222  
O 1.1794365453 0.1006006232 -2.0019616454  
O 1.5435942744 -0.1908432519 6.3994160404  
H 2.2718014454 -0.0359104155 3.9367723642  
H -0.7771143818 -0.3186094094 4.054911102  
H -0.4325686236 -0.4259724158 7.4434159869  
H -0.8501426751 -0.0887745769 -1.660218475  
H 3.4047426936 0.2292484558 -0.5567906317  
H 3.3578148315 0.1286809609 1.9193806472  
H -0.9540481494 -0.2368547765 1.8805972786

B3LYP Caffeic Acid (Radical) 0.008 a.u.

C 1.2549046741 0.0563989407 -0.7739984462  
C -0.004488167 -0.0811640261 -0.005819479  
C -0.0078890211 -0.13556579 1.3681910723  
C 1.2077825267 -0.059645879 2.0721790455  
C 2.4417801899 0.0731320042 1.3471891363  
C 2.4823153453 0.1294277247 -0.0076406879  
O -1.1146971319 -0.1470146919 -0.7146312913  
C 1.2811637712 -0.1081415957 3.5043958825  
C 0.2525944172 -0.2353304721 4.3795643643  
C 0.4806483403 -0.2694323426 5.8129971495  
O -0.6932676052 -0.4114166819 6.5107064844  
O 1.1804326303 0.1020828992 -2.0004968054  
O 1.5361149848 -0.1897720875 6.411045563  
H 2.2754408491 -0.0348177037 3.9322240299  
H -0.7741197944 -0.3190683624 4.055507469  
H -0.4311952286 -0.42733141 7.439658096  
H -0.859857166 -0.0900284672 -1.6591144214  
H 3.4067334892 0.2286354619 -0.5593497604  
H 3.3606392627 0.1281103723 1.917477302  
H -0.9533843667 -0.2365388928 1.8816882968

B3LYP Gallic Acid (Radical) Zero field

C -0.9482973497 -1.2190777515 0.0032510505  
C -1.7528096218 -0.0034833792 0.0016593467  
C -1.0192450868 1.265109146 -0.003398312  
C 0.3558850922 1.3170885508 -0.0065712324  
C 1.0685028606 0.1122377998 -0.0048735902

C 0.42120721 -1.1399710191 -0.0000031247  
O -2.9925207952 0.0221500399 0.0042944985  
O -1.7740846034 2.3608624585 -0.0047346345  
C 2.554103815 0.0930026954 -0.0081705543  
O 3.1029451398 1.3271950313 -0.0120849891  
O -1.6440230955 -2.3684101384 0.0079780474  
O 3.2226696338 -0.9118064905 -0.0063766567  
H 1.0335695182 -2.0322952486 0.0011056891  
H 0.8674794086 2.2666363174 -0.0103060964  
H -1.0434696516 -3.121957176 0.0088269298  
H -2.6996377438 2.0476357843 -0.0018665601  
H 4.0628172696 1.2082063799 -0.0134348116

B3LYP Gallic Acid (Radical) 0.010 a.u.

C -0.9448101701 -1.233562085 0.0033182966  
C -1.7539279269 -0.009791509 0.0018871777  
C -1.0190831575 1.2636175503 -0.0033529811  
C 0.3581822781 1.3074237822 -0.0064636992  
C 1.0752382049 0.1008768596 -0.0046276963  
C 0.4268049261 -1.1561625593 0.0001938189  
O -2.9821205445 0.0089635076 0.0044663653  
O -1.7549856188 2.3614192509 -0.0048025362  
C 2.5433425887 0.1038870674 -0.0077500393  
O 3.0936323493 1.3545133866 -0.012547738  
O -1.6547248383 -2.3625497697 0.0077987418  
O 3.2680275838 -0.8731527136 -0.005917503  
H 1.0319132118 -2.0530206052 0.001306424  
H 0.8649389621 2.2593360196 -0.0103013164  
H -1.0887692001 -3.142101973 0.0082829098  
H -2.6952540359 2.088799364 -0.0020880883  
H 4.0466873875 1.2046274264 -0.0141071362

B3LYP Gallic Acid (Radical) 0.002 a.u.

C -0.94770034 -1.2217663647 0.0032532316  
C -1.7527790717 -0.0046621896 0.0016602449  
C -1.0190920662 1.2645885133 -0.0033814381  
C 0.3564924713 1.3148598396 -0.006521685  
C 1.0694689273 0.109723035 -0.0048030593  
C 0.4223479571 -1.1431843219 0.0000424096  
O -2.9901551338 0.0197492079 0.0043336371  
O -1.7697254953 2.3608883315 -0.0047432901  
C 2.5516652705 0.0951682598 -0.0080384137  
O 3.1003668348 1.3326020729 -0.0121885615  
O -1.6460574165 -2.3670983321 0.0079352141  
O 3.2315685085 -0.9039283228 -0.0063031112  
H 1.0329453506 -2.0365652097 0.0011639949

H 0.8670360965 2.2648693261 -0.0102543161  
H -1.0519509461 -3.1256094754 0.0087214113  
H -2.6982264869 2.0557048209 -0.0019499131  
H 4.0588875399 1.2077838093 -0.0136313552

B3LYP Gallic Acid (Radical) 0.004 a.u.

C -0.9470831165 -1.2245161898 0.0032509532  
C -1.7528179202 -0.0058886158 0.0016468402  
C -1.0190434245 1.2641285347 -0.0033543865  
C 0.3569903605 1.3127605852 -0.0064268806  
C 1.0706075871 0.1073240534 -0.0046744827  
C 0.4234701163 -1.1464025062 0.0001197151  
O -2.9879382467 0.0172975917 0.0043291155  
O -1.7657425399 2.3609011517 -0.0047532531  
C 2.5494044619 0.0973693822 -0.0078062556  
O 3.098292001 1.3379368962 -0.0123462338  
O -1.6481738762 -2.3658348997 0.0078620376  
O 3.2406551579 -0.8960362337 -0.0062515853  
H 1.0324363792 -2.0407690795 0.0012633401  
H 0.8664689561 2.2632590147 -0.0101393264  
H -1.06068795 -3.1293872268 0.0085907082  
H -2.6972242414 2.0638497881 -0.0020582436  
H 4.0554782956 1.2071307536 -0.0139570622

B3LYP Gallic Acid (Radical) 0.006 a.u.

C -0.9463713585 -1.227461946 0.0032619881  
C -1.7530751627 -0.0072010165 0.0016797285  
C -1.0190971139 1.2638121332 -0.0033541144  
C 0.3573999564 1.3107245716 -0.0064461935  
C 1.0719943255 0.1049966831 -0.0046898  
C 0.4246255291 -1.1496721171 0.0001237582  
O -2.9857892461 0.0145457899 0.004440466  
O -1.7619597582 2.3609023643 -0.0047597106  
C 2.5472735036 0.0996197737 -0.0078244813  
O 3.0966717006 1.3434124728 -0.0123890832  
O -1.6502929554 -2.3645912848 0.0078617812  
O 3.2499240606 -0.8880509758 -0.0061302167  
H 1.0320341766 -2.0449940438 0.0012628519  
H 0.8657772273 2.2617394194 -0.0101885576  
H -1.0699689535 -3.1334826701 0.0085054699  
H -2.6965235241 2.0724759344 -0.002093791  
H 4.0524695927 1.206347912 -0.0139650953

B3LYP Gallic Acid (Radical) 0.008 a.u.

C -0.9456398563 -1.2304147145 0.003302355  
C -1.7534113985 -0.0084455009 0.0018084727

C -1.0190221293 1.2636637931 -0.0033539776  
C 0.3578572641 1.3091252809 -0.0064558013  
C 1.0735210856 0.1029627591 -0.0046440761  
C 0.4257067108 -1.1528637177 0.0001742036  
O -2.9840551349 0.0119398074 0.0044182993  
O -1.7585008135 2.361299156 -0.0047875751  
C 2.5453564052 0.1016704776 -0.0077674057  
O 3.0949530852 1.3488381172 -0.012476975  
O -1.6525198499 -2.3637187622 0.0078338424  
O 3.2587660437 -0.8808546008 -0.0060192152  
H 1.0320007347 -2.0489578523 0.001300773  
H 0.8654888805 2.2605849352 -0.0102541011  
H -1.0790020178 -3.1377797786 0.0083561059  
H -2.6958828486 2.0804480827 -0.0020764454  
H 4.049475839 1.2056255178 -0.0140634794

CBS-QB3 Caffeic Acid (Neutral) -0.010 a.u.

C 1.2685144171 0.0228975155 -0.7286583468  
C 0.0427044397 -0.1293722765 -0.0697194894  
C 0.0098949959 -0.2002155916 1.3144483355  
C 1.1938905558 -0.1149410353 2.069192665  
C 2.4106250761 0.0334450378 1.38399302  
C 2.4479708175 0.1002240754 -0.0050843597  
O -1.1180315502 -0.2018489219 -0.7990507782  
C 1.2311501563 -0.1585867344 3.5320313873  
C 0.2103824609 -0.2383973504 4.3928330914  
C 0.5091764978 -0.2494788489 5.8561055313  
O -0.6215818643 -0.3152667099 6.5771302383  
O 1.2142374391 0.0882497042 -2.125162023  
O 1.6202657433 -0.2026405448 6.3190368111  
H 2.2203531375 -0.1079664792 3.9806920531  
H -0.8320892894 -0.2890134606 4.1000589616  
H -0.3849331571 -0.3156264871 7.5197160477  
H 2.034874143 0.4918871417 -2.4206248389  
H -0.8682614445 -0.059504995 -1.7191965943  
H 3.3976212429 0.2099831621 -0.5231500451  
H 3.3308062843 0.1006086082 1.951382091  
H -0.9524591014 -0.3107638091 1.798610242

CBS-QB3 Caffeic Acid (Neutral) -0.002 a.u.

C 1.2648639961 0.0538121005 -0.7241846715  
C 0.0405629549 -0.0794475204 -0.0449567209  
C 0.0283669786 -0.1358162076 1.3372586597  
C 1.224859168 -0.0613107924 2.0742443839  
C 2.4335798999 0.0713819154 1.3769462602  
C 2.4537468034 0.1286999211 -0.0143647166

O -1.1268553513 -0.1525277053 -0.743769836  
C 1.2639980287 -0.1150641274 3.5327315733  
C 0.234778489 -0.2385099264 4.3840840646  
C 0.4876020061 -0.2724463622 5.838106049  
O -0.6694064767 -0.3991406476 6.534493624  
O 1.1698183185 0.1005976664 -2.0965961886  
O 1.5679060882 -0.1997520366 6.3760556413  
H 2.2511119409 -0.0456178006 3.9834249557  
H -0.7975686166 -0.3166610047 4.0665002045  
H -0.427306172 -0.4133442594 7.4724554901  
H 2.0473383668 0.1972706069 -2.4785710636  
H -0.9112537106 -0.0932898859 -1.6827724116  
H 3.3954250841 0.2322222367 -0.5455357984  
H 3.363847183 0.1308799589 1.9291932905  
H -0.9303039789 -0.2382641295 1.8298412105

CBS-QB3 Caffeic Acid (Neutral) -0.004 a.u.

C 1.2639816899 0.0518266545 -0.7249825446  
C 0.0395835907 -0.0834260635 -0.049873675  
C 0.023252917 -0.1411311123 1.3328646584  
C 1.2172008895 -0.0657138502 2.0731795179  
C 2.4273281774 0.0689199089 1.3784683703  
C 2.4507666527 0.1274004347 -0.0125862795  
O -1.1271778092 -0.1572632616 -0.7547548686  
C 1.2561799997 -0.1191675284 3.5332263042  
C 0.2293645257 -0.2391279513 4.3857390743  
C 0.4929290467 -0.2713613276 5.8422548303  
O -0.6574396346 -0.3909377044 6.5439514101  
O 1.1778175438 0.0999979759 -2.1029587002  
O 1.5807926534 -0.2017449757 6.3621795744  
H 2.243488389 -0.0515674365 3.9836345321  
H -0.8051230639 -0.3145942834 4.0737180093  
H -0.4171647536 -0.4040270974 7.4830815196  
H 2.0593986318 0.2180952186 -2.4683735537  
H -0.903928838 -0.0894964299 -1.6908799087  
H 3.3942727153 0.2321848344 -0.5409755794  
H 3.3556711301 0.1293097431 1.9336214348  
H -0.9360834535 -0.2445037479 1.8240498743

CBS-QB3 Caffeic Acid (Neutral) -0.006 a.u.

C 1.2633665401 0.0493066822 -0.7260128811  
C 0.038753772 -0.0898731455 -0.055451895  
C 0.017843672 -0.1501180781 1.3277514743  
C 1.2089596522 -0.0727928689 2.0721009171  
C 2.4207279234 0.0654521441 1.380130828  
C 2.4478559842 0.1261883122 -0.01048926

O -1.1269209878 -0.1650529271 -0.7671062815  
C 1.2478470292 -0.1260700014 3.5333120223  
C 0.2234053406 -0.2388240318 4.3879593928  
C 0.4987023976 -0.2695094133 5.8467516866  
O -0.6449942601 -0.3773839729 6.5545830103  
O 1.1866275156 0.1002827539 -2.1095305403  
O 1.5944722226 -0.2067287661 6.3478833355  
H 2.2357531018 -0.063147202 3.9830651547  
H -0.8136406038 -0.3080782769 4.082139599  
H -0.4059988822 -0.3896591585 7.4948014091  
H 2.0702986138 0.2495811826 -2.4573951525  
H -0.8958422239 -0.0847965818 -1.6998844189  
H 3.3932620936 0.2334437672 -0.535758493  
H 3.3468621186 0.1273885182 1.9386094669  
H -0.9422300195 -0.2559369359 1.8171246258

CBS-QB3 Caffeic Acid (Neutral) -0.008 a.u.

C 1.2638763319 0.0416577041 -0.7273417295  
C 0.038674695 -0.1012182281 -0.0618075231  
C 0.0124537598 -0.1644294599 1.3218602662  
C 1.2004444274 -0.0847130561 2.0709412229  
C 2.4143159241 0.0568999841 1.3819181717  
C 2.4459256226 0.1191800377 -0.0081589665  
O -1.1254241197 -0.1758796882 -0.7811490712  
C 1.2389809923 -0.1353685641 3.5330372647  
C 0.2170339419 -0.2393444973 4.3905731069  
C 0.504542497 -0.2642527293 5.8514978638  
O -0.6321300371 -0.3594364031 6.5660613938  
O 1.1973828516 0.0957819255 -2.1166608614  
O 1.6080165435 -0.2059981948 6.3334139007  
H 2.2274105129 -0.0755142143 3.9821202332  
H -0.8225480166 -0.3037502604 4.0913981657  
H -0.3939882531 -0.3680956304 7.5073485413  
H 2.073459048 0.3171920242 -2.4441992639  
H -0.8860949585 -0.0756755789 -1.7095539246  
H 3.3935409934 0.2273705285 -0.5299899216  
H 3.337911231 0.1207653936 1.9442194905  
H -0.9486729875 -0.2714990926 1.8090556406

CBS-QB3 Gallic Acid (Neutral) -0.010 a.u.

C -0.9550666722 -1.1612130581 0.0020494772  
C -1.6942986479 0.0198754697 0.0001818918  
C -1.0480071812 1.255106971 -0.004118021  
C 0.3434642825 1.3082020354 -0.0066077063  
C 1.07348194 0.1185930265 -0.0047608615

C 0.426942467 -1.1216154614 -0.0004497869  
O -3.0810655317 -0.0040812765 0.0026625116  
O -1.7906760624 2.4075992475 -0.0058292319  
C 2.5727480401 0.0812624633 -0.0071829366  
O 3.1226656211 1.3060123219 -0.0111104455  
O -1.7112345594 -2.3214471838 0.0064512677  
O 3.2000170638 -0.9465467004 -0.006453747  
H 1.0320491922 -2.0218256408 0.000897357  
H 0.84680144 2.2651994186 -0.0098442305  
H -1.1138261496 -3.076947137 0.0085921561  
H -3.3239027426 -0.93832024 0.0062929815  
H -2.7168872431 2.1407369616 -0.0028609122  
H 4.0883557433 1.2006337824 -0.0126157635

CBS-QB3 Gallic Acid (Neutral) -0.002 a.u.

C -0.9537968205 -1.1741660323 0.0022868511  
C -1.6934451666 0.0099530471 0.0004730197  
C -1.0436955215 1.2465662072 -0.0038998162  
C 0.346657501 1.2957577608 -0.0064890745  
C 1.0782079174 0.1057846897 -0.0046812387  
C 0.4300178517 -1.1352300609 -0.0002855499  
O -3.0638636758 0.0073754755 0.0028719044  
O -1.7705287426 2.3986262535 -0.0056344478  
C 2.5639033988 0.0900010072 -0.0073346545  
O 3.1072152833 1.3294788033 -0.0114564577  
O -1.7113495536 -2.3239289336 0.00662754  
O 3.2384077262 -0.9128333366 -0.0061225612  
H 1.026200686 -2.0404935505 0.0010355566  
H 0.8436383123 2.2554187993 -0.0098743382  
H -1.1324346412 -3.0927134553 0.0080969882  
H -3.3561238527 -0.9129764427 0.0058327191  
H -2.7053471402 2.1575360815 -0.0032717817  
H 4.0678974379 1.2070686868 -0.0128806586

CBS-QB3 Gallic Acid (Neutral) -0.004 a.u.

C -0.9541947345 -1.1708928614 0.0022380016  
C -1.693550739 0.0124485282 0.0004175336  
C -1.044659264 1.2485815775 -0.0039494196  
C 0.3459632085 1.2986767718 -0.0065314081  
C 1.0768312595 0.1087955067 -0.0047221877  
C 0.4291927181 -1.1319047738 -0.0003347528  
O -3.0680432644 0.0046931459 0.0028442622  
O -1.7751561622 2.4008794315 -0.0056765148  
C 2.5659362871 0.0877984671 -0.0073462438  
O 3.1105462762 1.3236749516 -0.011360517  
O -1.7112471207 -2.3233470677 0.0065993693



O 3.2287535877 -0.9212694273 -0.0061884501  
H 1.0274263311 -2.0359858609 0.0009865  
H 0.8445969428 2.2576157076 -0.0098907123  
H -1.1275158426 -3.088709315 0.0082136742  
H -3.3479205938 -0.919331292 0.0059387757  
H -2.7078868382 2.1535242802 -0.0031821459  
H 4.0724889482 1.2059772299 -0.0127617644

CBS-QB3 Gallic Acid (Neutral) -0.006 a.u.

C -0.9545392633 -1.1676496508 0.0021831932  
C -1.6937271603 0.0149339463 0.0003527975  
C -1.0456927956 1.2506771516 -0.0040025568  
C 0.345202616 1.3017177841 -0.0065689367  
C 1.0755917755 0.1119243321 -0.0047540457  
C 0.4284029807 -1.1285377052 -0.0003809495  
O -3.0722962917 0.0018934809 0.0028048689  
O -1.7800417142 2.4031302153 -0.0057224846  
C 2.5680860757 0.0856065538 -0.0073346842  
O 3.1142103532 1.3178440174 -0.0112681733  
O -1.7111985846 -2.322742107 0.0065634138  
O 3.2191585543 -0.9296957168 -0.0062625617  
H 1.0287978884 -2.0313895734 0.000943443  
H 0.845451371 2.2599704257 -0.0098970016  
H -1.1227872506 -3.0847547639 0.0083342649  
H -3.3398181118 -0.9256688531 0.0060527507  
H -2.7106453367 2.1493961343 -0.0030843178  
H 4.0774058939 1.2045693286 -0.0126650201

CBS-QB3 Gallic Acid (Neutral) -0.008 a.u.

C -0.9548292329 -1.1644286891 0.0021203079  
C -1.6939725577 0.0174067288 0.0002742765  
C -1.0468088655 1.2528502092 -0.0040586117  
C 0.344369543 1.3048944999 -0.0065940577  
C 1.0744736199 0.1151904589 -0.0047666126  
C 0.4276542285 -1.1251139866 -0.0004192738  
O -3.0766350049 -0.0010245047 0.0027438999  
O -1.7852104757 2.4053699302 -0.0057733912  
C 2.5703598886 0.0834284272 -0.0072797839  
O 3.1182449138 1.3119557322 -0.011185224  
O -1.7111997918 -2.3221090408 0.0065135988  
O 3.2095875322 -0.9381250721 -0.0063516115  
H 1.0303427491 -2.0266738043 0.0009134636  
H 0.8461857315 2.2625005002 -0.0098810262  
H -1.1182308364 -3.0808357592 0.0084614721  
H -3.3318160624 -0.9319921321 0.0061703893

H -2.7136434148 2.1451300968 -0.0029773134  
H 4.0826890354 1.2028014056 -0.0126165022

CBS-QB3 Caffeic Acid (Radical) -0.010 a.u.

C 1.2585217167 0.0558355553 -0.7763870557  
C -0.0005828148 -0.0816329888 -0.0310456182  
C -0.0431983133 -0.1379956641 1.337776822  
C 1.1622472088 -0.0618110484 2.0789153859  
C 2.4030182116 0.0753313414 1.3688435432  
C 2.4611977729 0.1326727288 0.0053911548  
O -1.0952772652 -0.1476865537 -0.811547843  
C 1.227814517 -0.1152816124 3.514157749  
C 0.2041818761 -0.2401473598 4.3918760448  
C 0.5146817093 -0.2773775603 5.8534850903  
O -0.6051370393 -0.392202294 6.5771769273  
O 1.1916913308 0.0940972193 -2.032399172  
O 1.6338391625 -0.2115278543 6.2942861295  
H 2.2168071278 -0.048526953 3.9605198194  
H -0.8369794743 -0.3153668328 4.100723495  
H -0.3718521118 -0.409536153 7.5211285672  
H -0.7166992098 -0.0779282833 -1.7127389246  
H 3.4027133134 0.2371786396 -0.5210769286  
H 3.3129145172 0.1343794421 1.9553915277  
H -0.9982502356 -0.2399547685 1.8372962861

CBS-QB3 Caffeic Acid (Radical) -0.002 a.u.

C 1.2536349983 0.0561562001 -0.7751551817  
C -0.0027878882 -0.0815542185 -0.016248123  
C -0.0225338396 -0.1376764847 1.3568597901  
C 1.1898723836 -0.0614665567 2.0748872088  
C 2.4253363453 0.074008244 1.3566530824  
C 2.4706699159 0.1316247025 -0.0052631964  
O -1.1080971 -0.147438759 -0.7612504575  
C 1.2574553655 -0.1130372242 3.5158344988  
C 0.2289075979 -0.2381361761 4.381738484  
C 0.4959961751 -0.2730917322 5.8362314302  
O -0.65206044 -0.4016349859 6.5392968599  
O 1.1767230572 0.0983846705 -2.0189217519  
O 1.5857355502 -0.1990603241 6.352087482  
H 2.2479229133 -0.0434447411 3.9577880921  
H -0.8055021513 -0.3166284411 4.0716482162  
H -0.4102144978 -0.4176363662 7.4776788739  
H -0.7813798173 -0.0828359431 -1.6828822305  
H 3.4025435465 0.2343366896 -0.5476596575  
H 3.3420804187 0.1313422849 1.9330517182  
H -0.9726505333 -0.2396918387 1.8653978618

CBS-QB3 Caffeic Acid (Radical) -0.004 a.u.

C 1.254325576 0.0557613337 -0.7751718711  
C -0.0022774218 -0.0816174366 -0.0188923795  
C -0.0267435221 -0.1378511278 1.3532149698  
C 1.1842400878 -0.0617416873 2.0757491719  
C 2.4205881316 0.074197245 1.3590840367  
C 2.4683287984 0.1318521031 -0.0031990268  
O -1.1055956607 -0.1475079973 -0.7716545949  
C 1.2515030567 -0.1137503872 3.5159809087  
C 0.2238867585 -0.2385751248 4.383203629  
C 0.5000811425 -0.2738510922 5.8402052559  
O -0.6419591317 -0.3994327654 6.546619548  
O 1.1790323625 0.0979492066 -2.0217954341  
O 1.5966677478 -0.2016471967 6.338862516  
H 2.24151993 -0.0448681594 3.9590945759  
H -0.8119682639 -0.3161360705 4.0769323113  
H -0.4038695148 -0.4158190628 7.486700188  
H -0.7665213647 -0.0819302123 -1.6886534462  
H 3.402230894 0.2352684332 -0.5422191803  
H 3.3359129342 0.1320404163 1.9375434058  
H -0.9777305402 -0.2398214175 1.8601684159

CBS-QB3 Caffeic Acid (Radical) -0.006 a.u.

C 1.2552823024 0.0561876675 -0.7752900447  
C -0.0017285671 -0.0816165705 -0.0221994703  
C -0.0315877103 -0.1380233066 1.3488483752  
C 1.1777663415 -0.0617631085 2.0767459715  
C 2.4152774684 0.0745889349 1.3619714797  
C 2.4659479435 0.13220012 -0.000664263  
O -1.102490001 -0.1475559151 -0.7835531471  
C 1.2446161312 -0.1143070435 3.5157410861  
C 0.2181373108 -0.2392354025 4.3853242653  
C 0.5045105025 -0.2750651354 5.8442176199  
O -0.630849994 -0.3972085316 6.555341819  
O 1.1822112239 0.0961340833 -2.024905952  
O 1.6082599483 -0.2043196504 6.3248216645  
H 2.2342091915 -0.0460152877 3.9599757869  
H -0.8193118708 -0.3161183922 4.083532806  
H -0.3952211641 -0.4136594429 7.4968675515  
H -0.7508671802 -0.0801344245 -1.6956247753  
H 3.4021406548 0.2358009383 -0.5359357642  
H 3.3290038787 0.1327304092 1.9427888196  
H -0.9836544102 -0.2401009419 1.8537691713

CBS-QB3 Caffeic Acid (Radical) -0.008 a.u.

C 1.2566974672 0.0560314086 -0.7757129036

C -0.0011935894 -0.0816251643 -0.026220904  
C -0.0370828882 -0.1380401127 1.3437272218  
C 1.1704457926 -0.0618152504 2.0778136499  
C 2.409455737 0.0749354139 1.3651950174  
C 2.4635987588 0.1324354127 0.002184087  
O -1.0991108855 -0.1476071799 -0.7967878734  
C 1.2367549492 -0.1148250717 3.5151136793  
C 0.2115928706 -0.2397126556 4.3881954221  
C 0.5093906477 -0.2761648211 5.8486760627  
O -0.6186149534 -0.3948270919 6.5654903741  
O 1.1864392824 0.0950936157 -2.0284340192  
O 1.6206587446 -0.2076084201 6.3100089636  
H 2.226017846 -0.0472681711 3.9604174661  
H -0.8276268479 -0.3157738323 4.0914023202  
H -0.3846624916 -0.4116582243 7.5083171447  
H -0.7342824445 -0.0789880581 -1.7036045371  
H 3.4023168103 0.2364864487 -0.5289226881  
H 3.3213640711 0.1335174174 1.9487237849  
H -0.990506877 -0.2400666635 1.8461907318

CBS-QB3 Gallic Acid (Radical) -0.010 a.u.

C -0.9530183949 -1.2074771773 0.0031860047  
C -1.7552958673 0.0036549479 0.0014311057  
C -1.0220757767 1.273037341 -0.0034309006  
C 0.3549926759 1.3353975467 -0.0064798552  
C 1.0685268634 0.1283998025 -0.0048052684  
C 0.4174866849 -1.124742284 -0.0000219458  
O -3.0102903441 0.0390997104 0.0039443595  
O -1.8082640049 2.3612548767 -0.0047274254  
C 2.5705369935 0.0820623419 -0.0080426079  
O 3.1229326806 1.3022637718 -0.0117959189  
O -1.6433359776 -2.3744957716 0.0080170544  
O 3.1834568485 -0.9540529209 -0.007143628  
H 1.0433920668 -2.0114155071 0.0010919117  
H 0.8738080251 2.283827504 -0.010044759  
H -1.0060257885 -3.0996388581 0.009271155  
H -2.7114058418 1.984418737 -0.0017383144  
H 4.089671157 1.2015289392 -0.0134159674

CBS-QB3 Gallic Acid (Radical) -0.002 a.u.

C -0.9513527708 -1.2175926678 0.0032362816  
C -1.7540291935 -0.0009962431 0.0015646653  
C -1.0208300566 1.2695306079 -0.0033850708  
C 0.3578365215 1.3245425054 -0.0064343146  
C 1.0701627338 0.1170105628 -0.0046890622  
C 0.4214536707 -1.1374277355 0.0000854407

O -2.9997521988 0.0296664895 0.0040633173  
O -1.7876716356 2.3624284838 -0.0047385411  
C 2.5604533183 0.0897537884 -0.0078276027  
O 3.108948345 1.322986898 -0.0121306113  
O -1.6502909902 -2.3701833355 0.007919075  
O 3.2182197333 -0.9230770682 -0.006671209  
H 1.0395366291 -2.0285723919 0.0012187162  
H 0.8723061859 2.2747263094 -0.0100793281  
H -1.0352121744 -3.1134631127 0.0088596051  
H -2.704986291 2.0209685882 -0.0018800773  
H 4.0703001733 1.2028213213 -0.0138162843

CBS-QB3 Gallic Acid (Radical) -0.004 a.u.

C -0.9518445848 -1.2149995987 0.0032215781  
C -1.7542068848 0.0002343489 0.0015243943  
C -1.021007141 1.2703195378 -0.0033948506  
C 0.3572643463 1.3270877063 -0.0064394756  
C 1.0695262404 0.1196950743 -0.0047111831  
C 0.4204156418 -1.134265736 0.0000606203  
O -3.0022147296 0.032286268 0.0040236317  
O -1.7925282416 2.3621308418 -0.0047343164  
C 2.5628524414 0.0877528602 -0.0078650199  
O 3.1119649594 1.3177826824 -0.0120525261  
O -1.6484961373 -2.3712716604 0.0079386535  
O 3.2094588423 -0.9308912727 -0.0067893428  
H 1.040317857 -2.0243466474 0.0011917724  
H 0.8728792128 2.2767728401 -0.0100589918  
H -1.027599126 -3.109887741 0.0089642034  
H -2.706368353 2.0117511852 -0.001847573  
H 4.0746776567 1.2029723113 -0.0137365745

CBS-QB3 Gallic Acid (Radical) -0.006 a.u.

C -0.9522876351 -1.2124479741 0.0032074527  
C -1.7544755887 0.0014183093 0.0014856187  
C -1.0212694048 1.2711763962 -0.0034052343  
C 0.3566020117 1.3297565406 -0.0064446569  
C 1.0690375386 0.1224950662 -0.0047333956  
C 0.41940463 -1.1310938811 0.0000364191  
O -3.0047892435 0.0347500191 0.0039887869  
O -1.7975938377 2.3618319859 -0.0047316888  
C 2.5653493123 0.085789747 -0.0079046852  
O 3.1152996734 1.3125787681 -0.0119716549  
O -1.6467424685 -2.3723567956 0.0079595303  
O 3.2007429889 -0.938685422 -0.0069132194  
H 1.0412261921 -2.0200702951 0.0011643127  
H 0.8733315546 2.2789798875 -0.0100397135

H -1.0201942294 -3.1063877981 0.009068516  
H -2.7079126245 2.0025602445 -0.00181767  
H 4.0793631307 1.2028282016 -0.0136537177

CBS-QB3 Gallic Acid (Radical) -0.008 a.u.

C -0.9526694288 -1.2099868919 0.003198997  
C -1.7548523736 0.0025543224 0.001467232  
C -1.0216243735 1.2720694611 -0.0034201032  
C 0.3558512514 1.332483267 -0.006475594  
C 1.0687244721 0.1253478568 -0.0047842086  
C 0.4184385562 -1.1279742516 -0.0000001129  
O -3.0074778539 0.0369267196 0.003972787  
O -1.8027248921 2.361590152 -0.0047279301  
C 2.5678403644 0.0839466047 -0.0079987983  
O 3.1189015701 1.3075274933 -0.0118806719  
O -1.6450386369 -2.3734266618 0.0079937748  
O 3.1921771147 -0.9462879466 -0.0070067104  
H 1.0422258713 -2.0158369958 0.0011183903  
H 0.8736407704 2.2812920671 -0.0100630279  
H -1.0131162231 -3.103053429 0.0091689248  
H -2.7094971619 1.9936000579 -0.0017645027  
H 4.0842929733 1.2023511747 -0.0135034458

CBS-QB3 Caffeic Acid (Neutral) Zero field

C 1.2661276259 0.0539002558 -0.7236604142  
C 0.0415392417 -0.0777818989 -0.040656518  
C 0.0329662133 -0.1329282622 1.3410106138  
C 1.2317694224 -0.0588104257 2.075346409  
C 2.439373145 0.0724110451 1.3755697253  
C 2.456874016 0.1283976338 -0.0158365286  
O -1.1260369392 -0.1503273542 -0.7340996198  
C 1.271129141 -0.1122425652 3.5318409531  
C 0.2396984328 -0.2378128222 4.3830001796  
C 0.4825985252 -0.2726081705 5.8340780312  
O -0.6807575905 -0.4044594737 6.5262426023  
O 1.1630056401 0.0988391516 -2.0904867999  
O 1.555547986 -0.1974626165 6.3894517381  
H 2.2581848191 -0.0414095545 3.9826301171  
H -0.7907198231 -0.3180161754 4.060443911  
H -0.4357168174 -0.4191192929 7.4627906172  
H 2.0345261479 0.19070978 -2.4880195963  
H -0.9180514455 -0.0949883541 -1.6755836354  
H 3.3969493376 0.2303863185 -0.5494624373  
H 3.3713006203 0.131416081 1.9252918594  
H -0.9251966985 -0.2344213 1.8346927925

CBS-QB3 Caffeic Acid (Neutral) 0.010 a.u.

C 1.2746654112 0.0537445845 -0.7252860712  
C 0.0430276648 -0.0724824632 -0.0282904555  
C 0.0450029303 -0.1231122352 1.3504097101  
C 1.2525274785 -0.0497435763 2.0821159935  
C 2.4602639193 0.0769502581 1.3700195122  
C 2.4730698902 0.1276296923 -0.0186459481  
O -1.1199239916 -0.1425725324 -0.7042819787  
C 1.296081728 -0.1016824572 3.5219986456  
C 0.2568748607 -0.2336493595 4.3874435815  
C 0.4637921025 -0.2726910124 5.8180456482  
O -0.7270052522 -0.4225406931 6.50515476  
O 1.1433709263 0.0914381656 -2.0635804893  
O 1.5044268927 -0.1933793566 6.4531042166  
H 2.2855770017 -0.0274865449 3.9685638346  
H -0.7667736662 -0.3205636788 4.0477703346  
H -0.4506084224 -0.440632404 7.4304387814  
H 1.9840134636 0.168504972 -2.5323373566  
H -0.9455935636 -0.1010603254 -1.6564224231  
H 3.4080094863 0.2240530759 -0.5598845492  
H 3.3970930229 0.1346165656 1.9128868542  
H -0.9127808829 -0.2216686751 1.845361399

CBS-QB3 Caffeic Acid (Neutral) 0.002 a.u.

C 1.2675588758 0.0539230997 -0.7233867411  
C 0.0423400934 -0.0763217187 -0.0369558303  
C 0.0368353661 -0.1303261661 1.3441595358  
C 1.2377322962 -0.0564954186 2.0765530607  
C 2.4445910833 0.0734288317 1.3743455175  
C 2.4600186492 0.1281385197 -0.0169605181  
O -1.125040659 -0.1483643916 -0.7256651073  
C 1.2774946428 -0.1096061343 3.5305937534  
C 0.2440942236 -0.2369470589 4.3825472142  
C 0.4779784427 -0.2726394011 5.8302489237  
O -0.6912877686 -0.4092710238 6.5192877574  
O 1.1571703715 0.097120097 -2.084588591  
O 1.5438673202 -0.1957984097 6.402488082  
H 2.2646632207 -0.0376773887 3.9811920743  
H -0.784568136 -0.3188924537 4.0555241383  
H -0.4421440338 -0.4245841391 7.4541503252  
H 2.0225694579 0.1847758694 -2.497260124  
H -0.9243897524 -0.0965542412 -1.6695053664  
H 3.3986830276 0.2287226309 -0.5527087454  
H 3.3779375776 0.1320297357 1.9219387766  
H -0.9209932988 -0.2309888387 1.8385858645

CBS-QB3 Caffeic Acid (Neutral) 0.004 a.u.

C 1.2691317151 0.0538937751 -0.7233660342  
C 0.0429207613 -0.0750708878 -0.0338605717  
C 0.039956976 -0.1280327288 1.3466865614  
C 1.2427759423 -0.054407153 2.0778335701  
C 2.4492714433 0.0744070285 1.3732344048  
C 2.4631933866 0.1279235264 -0.0177855885  
O -1.1239117551 -0.1466293926 -0.7184804875  
C 1.2831157209 -0.107217974 3.5289868973  
C 0.247963211 -0.236086489 4.3827115568  
C 0.4738246192 -0.2726841179 5.8266999713  
O -0.7010446196 -0.4134832443 6.5136250715  
O 1.1522663509 0.0954790338 -2.0789440667  
O 1.5329598745 -0.1946080184 6.4152333524  
H 2.2705871365 -0.0344071272 3.9790752732  
H -0.7791532783 -0.3195648264 4.0518031439  
H -0.4468189733 -0.4294635363 7.4465759143  
H 2.0115138771 0.1795906577 -2.5062396609  
H -0.9302353408 -0.0979152978 -1.664548522  
H 3.4006465395 0.2272413778 -0.5553371617  
H 3.3838197213 0.1326811645 1.9190765065  
H -0.9176723085 -0.2279737703 1.8416038695

CBS-QB3 Caffeic Acid (Neutral) 0.006 a.u.

C 1.2708507068 0.0538429782 -0.7236439042  
C 0.0432414763 -0.0740216744 -0.0313764942  
C 0.0423459318 -0.1260652082 1.3485744982  
C 1.2469099362 -0.0525754409 2.0791985669  
C 2.4534207925 0.0753285635 1.3721916688  
C 2.4664067706 0.1277650204 -0.0183177121  
O -1.1226629422 -0.1450891919 -0.7125594266  
C 1.2880336429 -0.1051011138 3.527019888  
C 0.2513466184 -0.2352490161 4.383562676  
C 0.4701234871 -0.2727175635 5.8234577077  
O -0.7101636396 -0.4170919963 6.5093346075  
O 1.1483405683 0.0939761066 -2.0735504287  
O 1.5227953918 -0.1938437756 6.4277988645  
H 2.275991701 -0.0316141121 3.9762782951  
H -0.7744252323 -0.3200613499 4.0493028581  
H -0.4497362007 -0.4337467108 7.4400765009  
H 2.001400861 0.1751268637 -2.5150471461  
H -0.935688224 -0.099100804 -1.6607490448  
H 3.4028426779 0.2259709277 -0.5573691474  
H 3.3889473462 0.1333476174 1.9166630514  
H -0.91521067 -0.2254081198 1.843738121



CBS-QB3 Caffeic Acid (Neutral) 0.008 a.u.

C 1.272682292 0.0537828915 -0.7242489875  
C 0.0433015731 -0.0731986631 -0.0295161185  
C 0.0440275964 -0.1244700446 1.3498324256  
C 1.2501532757 -0.0510422095 2.0806203119  
C 2.4570763592 0.0761790879 1.3711395749  
C 2.4696860834 0.1276792318 -0.0185987005  
O -1.1213339335 -0.1438161606 -0.7078079366  
C 1.2923324699 -0.1032786109 3.5247045432  
C 0.2542910359 -0.2343653732 4.3851109288  
C 0.4667731215 -0.2726644781 5.8205807075  
O -0.7187384102 -0.4200370637 6.5064451399  
O 1.1453690438 0.09261733 -2.0684403256  
O 1.513344804 -0.1935650986 6.4403007255  
H 2.2809733169 -0.0294003019 3.9727816056  
H -0.7703412474 -0.3202298484 4.0479698205  
H -0.4510166536 -0.4374692018 7.4346650998  
H 1.9922416201 0.1715522871 -2.5236812511  
H -0.9407648769 -0.100166822 -1.6580077662  
H 3.4052807875 0.2249381864 -0.5588735144  
H 3.3933589049 0.1340073215 1.9146226174  
H -0.9135861627 -0.22338046 1.8449850998

CBS-QB3 Gallic Acid (Neutral) Zero field

C -0.9533473416 -1.1774789391 0.0023310634  
C -1.6934134269 0.0074485834 0.0005221669  
C -1.0427956093 1.2446370871 -0.0038547005  
C 0.3472888089 1.2929539672 -0.0064480184  
C 1.0797344117 0.1028811959 -0.0046391661  
C 0.4308730921 -1.1385245794 -0.0002372263  
O -3.0597515763 0.0099379253 0.0028947538  
O -1.7661467053 2.396375853 -0.0055961642  
C 2.5619904087 0.0922034567 -0.0073151456  
O 3.1042025764 1.3352789233 -0.0115499119  
O -1.711511761 -2.3244906224 0.0066523938  
O 3.2481500759 -0.9043885297 -0.0060610003  
H 1.025102742 -2.0449346786 0.0010851171  
H 0.8425872601 2.2533709084 -0.0098572076  
H -1.1375632216 -3.0967799645 0.0079834577  
H -3.3644358739 -0.9066043954 0.0057385784  
H -2.7030190227 2.1614495261 -0.00335324  
H 4.0636161629 1.2078892826 -0.0130017502

CBS-QB3 Gallic Acid (Neutral) 0.010 a.u.

C -0.9501532048 -1.1946156511 0.0025332026  
C -1.6945432034 -0.0049222835 0.0006948226

C -1.03902249 1.2367062552 -0.0036391497  
C 0.3494206192 1.2806493956 -0.0061306953  
C 1.0900728745 0.0898645644 -0.004239463  
C 0.4353528751 -1.1545258499 0.0001128469  
O -3.0400934436 0.0201670175 0.002867894  
O -1.7478515056 2.3856872817 -0.0054428957  
C 2.5537085308 0.1030528135 -0.0068447321  
O 3.093725776 1.3651763447 -0.0121349084  
O -1.7133081254 -2.3268169722 0.0067333613  
O 3.2985534735 -0.8621238392 -0.0059430662  
H 1.020970801 -2.066351218 0.0014919049  
H 0.8363758647 2.2451239767 -0.0096071049  
H -1.1667329375 -3.1179983705 0.0073231174  
H -3.4067533478 -0.8756362818 0.0052579097  
H -2.6945008853 2.1802862397 -0.0037463536  
H 4.0463393285 1.2075015772 -0.0139926904

CBS-QB3 Gallic Acid (Neutral) 0.004 a.u.

C -0.9522693785 -1.1842159583 0.0024110617  
C -1.6936054091 0.0024256476 0.0006106111  
C -1.0411735129 1.2410647852 -0.0037809415  
C 0.3483425325 1.2876873 -0.0063872177  
C 1.0832989834 0.0973871817 -0.0045738455  
C 0.4326558817 -1.1450071968 -0.0001524316  
O -3.0517052612 0.0146028669 0.0029460505  
O -1.7581246958 2.3919188358 -0.0055320558  
C 2.5584411189 0.0966156635 -0.0072924604  
O 3.0991646366 1.3469679413 -0.0117080755  
O -1.7120088751 -2.3255235716 0.0067087242  
O 3.2679801943 -0.8874247842 -0.0059448496  
H 1.0232131048 -2.0536382417 0.001173754  
H 0.8402176515 2.2496947329 -0.0098478944  
H -1.1484708 -3.1050812094 0.007756582  
H -3.3813423959 -0.8939251888 0.0055977716  
H -2.6990246375 2.1690987205 -0.0034939461  
H 4.0559718622 1.2085774752 -0.013196837

CBS-QB3 Gallic Acid (Neutral) 0.006 a.u.

C -0.9516311629 -1.1876392159 0.002449107  
C -1.6938199402 -0.0000616275 0.0006483946  
C -1.0404221123 1.2394560028 -0.0037472042  
C 0.3487764079 1.28522719 -0.0063514919  
C 1.0853562451 0.094786018 -0.0045298626  
C 0.4335693483 -1.1482082272 -0.0001032621  
O -3.0477833185 0.0166652687 0.0029617603  
O -1.7544700362 2.3897715081 -0.0055051696

C 2.5568040309 0.0987968361 -0.0072558351  
O 3.0970697039 1.3529012352 -0.0117890779  
O -1.7123539314 -2.3260092351 0.0067355712  
O 3.2780506469 -0.8789648689 -0.0059039642  
H 1.022408309 -2.0579181284 0.0012287944  
H 0.8389649261 2.248050154 -0.0098345126  
H -1.1542803093 -3.1093433146 0.0076357011  
H -3.3898683127 -0.887695376 0.005533315  
H -2.6973412294 2.1728959216 -0.0035610659  
H 4.0525317349 1.2085148593 -0.0133171974

CBS-QB3 Gallic Acid (Neutral) 0.008 a.u.

C -0.9509230105 -1.191109852 0.002487903  
C -1.6941152594 -0.002517658 0.0006787283  
C -1.0396950301 1.2379910888 -0.0037069411  
C 0.3491493766 1.2828764492 -0.0062865372  
C 1.0876079682 0.0922727277 -0.0044450944  
C 0.4344796145 -1.1513896959 -0.0000304209  
O -3.0438985149 0.0185401536 0.0029510199  
O -1.7510212793 2.3876888261 -0.0054780931  
C 2.5552279847 0.1009491712 -0.0071482897  
O 3.0952025397 1.3589595113 -0.0119042033  
O -1.712779006 -2.3264516302 0.0067514468  
O 3.2882180266 -0.8705340091 -0.0058907084  
H 1.0216745735 -2.0621612141 0.0013153989  
H 0.8376911016 2.2465222539 -0.0097812005  
H -1.160361812 -3.1136603086 0.0075001829  
H -3.3983540445 -0.8815643642 0.0054432623  
H -2.6958115938 2.1766259402 -0.00363674  
H 4.0492693648 1.2081876102 -0.0135257133

CBS-QB3 Gallic Acid (Neutral) 0.002 a.u.

C -0.9528409333 -1.1808345376 0.0023729525  
C -1.6934673245 0.0049330394 0.0005677203  
C -1.041959158 1.2428014727 -0.0038137247  
C 0.347850432 1.2902597534 -0.006410336  
C 1.0814298149 0.1000823577 -0.004598509  
C 0.4317530459 -1.1417821015 -0.0001899023  
O -3.0556900882 0.0123564239 0.0029170942  
O -1.762012916 2.3941232666 -0.0055613048  
C 2.560172255 0.0944007878 -0.007293105  
O 3.1015288154 1.3411130615 -0.011639109  
O -1.7117311952 -2.3250168719 0.0066781755  
O 3.2580137948 -0.8959086316 -0.0060031868  
H 1.0241055688 -2.0493164899 0.0011351394  
H 0.841438558 2.2514627936 -0.0098434793

H -1.1429126267 -3.1008996281 0.0078676977  
H -3.372855999 -0.9002335661 0.005655162  
H -2.7009122556 2.1652881087 -0.0034287759  
H 4.0596512116 1.2083957614 -0.0131185088

CBS-QB3 Caffeic Acid (Radical) Zero field

C 1.2533244858 0.0565634322 -0.775407723  
C -0.0034175668 -0.0814451102 -0.0141561825  
C -0.0190559435 -0.1373762007 1.3598617461  
C 1.1946556232 -0.0611136019 2.0741751825  
C 2.4296077825 0.0738470321 1.3545478126  
C 2.4730962853 0.1313418188 -0.0069473605  
O -1.1101978212 -0.1472652671 -0.7521700578  
C 1.2625616808 -0.1122595716 3.5152424021  
C 0.2332483467 -0.237898262 4.3808796044  
C 0.492422138 -0.2726512749 5.8324733535  
O -0.6612516767 -0.4037948812 6.5331765455  
O 1.1751664188 0.0987206325 -2.016295011  
O 1.5755918158 -0.1965017233 6.3647324895  
H 2.2535776885 -0.0418515842 3.9559069905  
H -0.7999056223 -0.3175199718 4.0676021453  
H -0.4147395406 -0.4191745782 7.4696795648  
H -0.7952886581 -0.0836689759 -1.6781332867  
H 3.4032061239 0.2332664491 -0.5523363944  
H 3.3475603155 0.1306466207 1.9292630008  
H -0.9685098756 -0.2393459827 1.8696781783

CBS-QB3 Caffeic Acid (Radical) 0.010 a.u.

C 1.2578644335 0.0569921404 -0.7811833914  
C -0.0074395654 -0.0812055791 -0.0129407109  
C -0.0121012666 -0.1354533372 1.3653842152  
C 1.2054212221 -0.0594208031 2.0726176731  
C 2.4442285857 0.0734956181 1.346513016  
C 2.4872945256 0.1299129194 -0.0108986762  
O -1.1155773451 -0.1467318189 -0.724934389  
C 1.2766212275 -0.1080299069 3.5062126574  
C 0.2458258537 -0.235419733 4.3866974314  
C 0.4789665503 -0.2695453796 5.8179201607  
O -0.6964141198 -0.4122636091 6.5242490567  
O 1.1813248544 0.1024685159 -2.0079223136  
O 1.5352352341 -0.1903046471 6.4221520037  
H 2.2718225171 -0.0350190888 3.9378524284  
H -0.7834096761 -0.3198003007 4.064120365  
H -0.4092751177 -0.4273807011 7.4464940382  
H -0.8538911755 -0.089814107 -1.6697019348  
H 3.412044916 0.2287247972 -0.5658461825

H 3.3644690738 0.1280762938 1.9188223802  
H -0.9613587274 -0.2367622733 1.8761651722

CBS-QB3 Caffeic Acid (Radical) 0.002 a.u.

C 1.2533832591 0.0570125494 -0.775827266  
C -0.0040112911 -0.0814025655 -0.0127376616  
C -0.0161594348 -0.1370943286 1.3621938393  
C 1.1986388578 -0.0607028011 2.0735798576  
C 2.4334677627 0.0737708296 1.3526617181  
C 2.475612083 0.1310949295 -0.008322034  
O -1.1120819516 -0.1472759963 -0.7441379927  
C 1.2668733117 -0.1113743723 3.5142192029  
C 0.2369513214 -0.237271999 4.3806840747  
C 0.4889552724 -0.2718633846 5.828959635  
O -0.6696548959 -0.4058224803 6.5286054327  
O 1.1749125702 0.0989976594 -2.0140208302  
O 1.5659640677 -0.1947539737 6.3768470833  
H 2.2584964408 -0.0403994653 3.9535120368  
H -0.7950480979 -0.3177543536 4.0644726467  
H -0.4172191799 -0.4211537717 7.4628949905  
H -0.8087806705 -0.0846693244 -1.6742462639  
H 3.4041344919 0.2322188878 -0.5564058369  
H 3.3524031855 0.1300555089 1.9260180833  
H -0.9651851025 -0.2390925481 1.8728222845

CBS-QB3 Caffeic Acid (Radical) 0.004 a.u.

C 1.2538324713 0.0574305711 -0.7766130155  
C -0.0047748501 -0.0813385834 -0.0118447273  
C -0.0140365065 -0.1367289031 1.3639412597  
C 1.2017423842 -0.0602639624 2.0731551549  
C 2.4368906227 0.0737146349 1.3509878934  
C 2.4782898094 0.1308155553 -0.0093614134  
O -1.1135774266 -0.1472175723 -0.7373677  
C 1.270434889 -0.1104658768 3.5127540853  
C 0.2400471421 -0.2368003355 4.3811139949  
C 0.4859600361 -0.2712917414 5.8256661394  
O -0.6773563707 -0.407729093 6.525272799  
O 1.1753524844 0.099327009 -2.0120342718  
O 1.5571589443 -0.1931489503 6.38856182  
H 2.2627997771 -0.0388703532 3.9504629364  
H -0.7910058994 -0.318281278 4.0625581967  
H -0.4180180614 -0.422879781 7.4571197693  
H -0.8213314008 -0.085683617 -1.6713637879  
H 3.4054914187 0.2311277314 -0.5597729583  
H 3.3565756124 0.1294818691 1.9234121015  
H -0.9628230761 -0.2386783236 1.8751247236

CBS-QB3 Caffeic Acid (Radical) 0.006 a.u.

C 1.2548348512 0.0568447046 -0.7776760102  
C -0.0055317327 -0.0812566366 -0.0115890914  
C -0.0127408349 -0.1361502588 1.3649593646  
C 1.2038158503 -0.0599446344 2.0729140624  
C 2.4397405432 0.073586716 1.3494816349  
C 2.4811231187 0.1303769569 -0.0100626776  
O -1.1145760484 -0.1469463069 -0.7322334999  
C 1.2731607951 -0.1095681617 3.5109142058  
C 0.2424450875 -0.2362785784 4.3822687667  
C 0.4833569614 -0.2705766145 5.8227471335  
O -0.6841218194 -0.4095495253 6.5235655652  
O 1.1764678368 0.1005001742 -2.0102223997  
O 1.5491810642 -0.1919243541 6.3998646724  
H 2.266312218 -0.037396096 3.9468962103  
H -0.7878048623 -0.3187888827 4.0619278703  
H -0.4166456697 -0.4247006814 7.4525917195  
H -0.8329570181 -0.0873160088 -1.6700362554  
H 3.4072705222 0.2302706086 -0.5623057074  
H 3.3598439925 0.1290471507 1.9214682465  
H -0.9615228559 -0.2377105712 1.8762991894

CBS-QB3 Caffeic Acid (Radical) 0.008 a.u.

C 1.2561301218 0.0568414581 -0.7791492762  
C -0.0064229545 -0.0812258888 -0.0119439959  
C -0.0120639248 -0.1357878761 1.3654572358  
C 1.2050920849 -0.0596721338 2.0727293616  
C 2.4422099801 0.0735381584 1.3480250347  
C 2.4840906097 0.1301358266 -0.0105710648  
O -1.1152911154 -0.146843873 -0.7279752338  
C 1.2752206455 -0.1088021502 3.5087310226  
C 0.2443649618 -0.2358267384 4.3840916863  
C 0.4810054777 -0.2700620331 5.8201382963  
O -0.6904721948 -0.4109535895 6.5231225117  
O 1.1785353744 0.1014865726 -2.0088598972  
O 1.5418971252 -0.1910458692 6.4109414709  
H 2.2693294132 -0.0362108135 3.9426954552  
H -0.7852929722 -0.319232853 4.0624199894  
H -0.4138071651 -0.42607184 7.4489801332  
H -0.8438117699 -0.0886270526 -1.669318277  
H 3.4094057414 0.2295101732 -0.5643481933  
H 3.3625249654 0.1285858041 1.9199372693  
H -0.9609924046 -0.2372162817 1.8766694715

CBS-QB3 Gallic Acid (Radical) Zero field

C -0.9509519081 -1.2204231753 0.0032723383  
C -1.7540644638 -0.0022679654 0.0016587671  
C -1.0206930438 1.269120304 -0.003414107  
C 0.3584008678 1.3221208515 -0.0065821788  
C 1.0709515799 0.1144402554 -0.0048609745  
C 0.4223322411 -1.1405631407 0.0000067747  
O -2.9973588371 0.0265462271 0.0042782193  
O -1.7829009387 2.3629875307 -0.0047464891  
C 2.5583926737 0.0916652469 -0.0081436267  
O 3.1063262719 1.3282030617 -0.0120243519  
O -1.6521215904 -2.3694348655 0.0080125845  
O 3.2270022152 -0.9152271038 -0.0065039022  
H 1.0387744294 -2.0327043032 0.0010992524  
H 0.8718652218 2.2727637369 -0.0103170429  
H -1.0434837483 -3.1177793312 0.0088345608  
H -2.7037297187 2.0305768325 -0.0018373115  
H 4.0663507481 1.2030988384 -0.0134375125

CBS-QB3 Gallic Acid (Radical) 0.010 a.u.

C -0.9470004606 -1.2347631557 0.0033479874  
C -1.7554467502 -0.0092138732 0.0018682998  
C -1.0212329139 1.2668864341 -0.0033605796  
C 0.3595559028 1.3119934248 -0.0064572044  
C 1.0774081412 0.1032731835 -0.0046129235  
C 0.4280752406 -1.1565151347 0.0002195973  
O -2.9872190759 0.0107795455 0.0044482307  
O -1.7630178399 2.3643126382 -0.0048144828  
C 2.5478053418 0.1024418627 -0.0077224311  
O 3.0976306503 1.3554033655 -0.0124476336  
O -1.6619538826 -2.3636138749 0.0078664768  
O 3.2721329532 -0.8761685637 -0.0061196159  
H 1.0374799222 -2.0531111302 0.0013258131  
H 0.8670831171 2.2656734866 -0.0102978476  
H -1.0863600539 -3.1371543584 0.008261745  
H -2.7001003181 2.0765886113 -0.0021067128  
H 4.0502520257 1.1963105385 -0.0141037188

CBS-QB3 Gallic Acid (Radical) 0.002 a.u.

C -0.9502512976 -1.2232129606 0.0032874738  
C -1.7541468779 -0.0035915561 0.0016976986  
C -1.0206457903 1.2685538129 -0.0034194681  
C 0.3588493915 1.3197961437 -0.0066297682  
C 1.0719326218 0.1119547031 -0.0049154998  
C 0.4235078114 -1.1437622724 -0.0000096627  
O -2.9949645186 0.0235013435 0.0044107913  
O -1.7782937043 2.3631851091 -0.0047506598

C 2.5559697952 0.0937816665 -0.0082325242  
O 3.1038313503 1.3337269105 -0.0120212023  
O -1.6539812508 -2.3681732058 0.0080374448  
O 3.2358233249 -0.9072572673 -0.0063812762  
H 1.0382741754 -2.0369260626 0.0010738367  
H 0.871065148 2.2710246652 -0.0104069123  
H -1.051769006 -3.1214983283 0.0087681093  
H -2.7024701866 2.0398130804 -0.0018614623  
H 4.0623610137 1.2022072181 -0.0133519186

CBS-QB3 Gallic Acid (Radical) 0.004 a.u.

C -0.949523002 -1.2259451165 0.0032887552  
C -1.7542850234 -0.0049397685 0.0017037858  
C -1.0206913192 1.2679319693 -0.0034037942  
C 0.3591637994 1.3176118449 -0.0065963836  
C 1.0730532559 0.1095670414 -0.0048721531  
C 0.4246972265 -1.1469775443 0.0000232868  
O -2.9928444968 0.0204055663 0.0044769663  
O -1.7738791273 2.3634102498 -0.0047539706  
C 2.553623097 0.0959959856 -0.0081419056  
O 3.1015775373 1.3392082238 -0.0121160441  
O -1.6559507054 -2.3668260695 0.0080038757  
O 3.2448081219 -0.8993240057 -0.0062852543  
H 1.0378697714 -2.0411230738 0.0011185079  
H 0.8701198573 2.269464942 -0.0103831149  
H -1.0600595763 -3.1250246099 0.0086649946  
H -2.7012096014 2.0487456916 -0.0019377796  
H 4.058622185 1.2009416735 -0.0134947723

CBS-QB3 Gallic Acid (Radical) 0.006 a.u.

C -0.9487928821 -1.2287286451 0.0032806991  
C -1.7544949547 -0.0063392335 0.0016755438  
C -1.0208558297 1.2673881615 -0.0033663716  
C 0.3593479159 1.3155522189 -0.0064676974  
C 1.0743193928 0.1073057541 -0.0047092951  
C 0.425834509 -1.1501623576 0.0001179445  
O -2.9908539307 0.0173109609 0.004455068  
O -1.7699581205 2.3636119669 -0.0047620299  
C 2.5515590018 0.098191396 -0.0078512438  
O 3.0999126321 1.3444953327 -0.0123074937  
O -1.6579649607 -2.3655933681 0.0079110749  
O 3.2539932001 -0.8914118461 -0.0062591946  
H 1.0375509734 -2.0452109036 0.0012428422  
H 0.8690584466 2.268033815 -0.0102245253  
H -1.0685175934 -3.1286980378 0.0085276001  
H -2.7005423248 2.0578739324 -0.0020777462



H 4.0554965248 1.1995038534 -0.0138901748

CBS-QB3 Gallic Acid (Radical) 0.008 a.u.

C -0.9479453788 -1.2317384456 0.0032895206  
C -1.7548862439 -0.0078106359 0.0016923605  
C -1.0211217166 1.2670426542 -0.0033553965  
C 0.359445724 1.31359456 -0.0064453815  
C 1.0758033526 0.1051518544 -0.0046777629  
C 0.4270046956 -1.1533869035 0.000146104  
O -2.9888469435 0.0139751803 0.0045389995  
O -1.7663432789 2.3637818004 -0.0047724651  
C 2.5495704666 0.1004342326 -0.0077957482  
O 3.0988057812 1.3499622974 -0.0123691918  
O -1.659991947 -2.3643997824 0.0078929535  
O 3.2633840948 -0.8833431911 -0.0061991774  
H 1.0373702553 -2.0492956963 0.0012718224  
H 0.8678766765 2.2667296232 -0.0102191464  
H -1.0775607671 -3.1327552689 0.0084377296  
H -2.7003110018 2.0674300592 -0.0021561402  
H 4.0528382309 1.1977506621 -0.0139840803

LC-BLYP Caffeic Acid (Neutral) -0.010 a.u.

C 1.2530201524 0.0670417982 -0.6897109768  
C 0.053198156 -0.1394577304 -0.0409613567  
C 0.0263526164 -0.237463611 1.323910441  
C 1.1939124563 -0.1296539983 2.0617250319  
C 2.3854359033 0.0671286066 1.3915076963  
C 2.416464262 0.1680495871 0.020522739  
O -1.0879171987 -0.2453953727 -0.7668743614  
C 1.2305648798 -0.2113356468 3.5193354049  
C 0.2169244466 -0.1897122323 4.3555069492  
C 0.5075486314 -0.2678046761 5.8071638181  
O -0.5963145875 -0.2127681233 6.5343925761  
O 1.1971194191 0.1555271251 -2.0639292093  
O 1.6063685865 -0.365586883 6.2572763344  
H 2.2148994703 -0.2791607033 3.9704307338  
H -0.8197745589 -0.1048195985 4.061356206  
H -0.3662790839 -0.2593773795 7.476372002  
H 2.0651287289 0.3938060118 -2.392598173  
H -0.8650698802 -0.1236996041 -1.6942021707  
H 3.3565175807 0.3256898687 -0.4956936357  
H 3.3015370975 0.1473800275 1.9592552408  
H -0.924526078 -0.4047154655 1.8097987101

LC-BLYP Caffeic Acid (Neutral) -0.002 a.u.

C 1.2590669295 0.0526287172 -0.6881027658

C 0.0535546329 -0.0800726159 -0.0169889742  
C 0.04116323 -0.1359002708 1.3470455155  
C 1.2235381151 -0.0613761618 2.0678036435  
C 2.4127400382 0.0700993085 1.383846526  
C 2.4328957772 0.1273280967 0.0074549333  
O -1.0963196796 -0.1527504573 -0.7151117033  
C 1.259214424 -0.1161448907 3.5234409767  
C 0.2384204758 -0.235720832 4.3476707988  
C 0.4865736768 -0.2713072117 5.7937725838  
O -0.643469917 -0.3924922729 6.4921772536  
O 1.1675943304 0.0994918245 -2.0446143534  
O 1.5581472447 -0.2024676903 6.3192321621  
H 2.2411268395 -0.0502880268 3.9796121323  
H -0.7901093014 -0.3102371156 4.0271677448  
H -0.4099722606 -0.4085667083 7.430797616  
H 2.0333626742 0.1953452223 -2.4470458471  
H -0.8988942676 -0.0952306244 -1.6565354277  
H 3.3705618728 0.2310527581 -0.5240613636  
H 3.3400045612 0.1292981062 1.9360915689  
H -0.9140883961 -0.239017155 1.8409309799

LC-BLYP Caffeic Acid (Neutral) -0.004 a.u.

C 1.2575201388 0.0560220355 -0.6886488425  
C 0.05294747 -0.0897953383 -0.0221394809  
C 0.0372278976 -0.1531971666 1.3422635489  
C 1.2166332412 -0.0730447696 2.0663675307  
C 2.406618792 0.0697803786 1.3851652597  
C 2.4292667195 0.1351212734 0.0096786492  
O -1.0956452578 -0.168399937 -0.726163618  
C 1.2526684751 -0.1320821547 3.5230783425  
C 0.2326063361 -0.2280626895 4.3494523237  
C 0.4917414003 -0.2708211018 5.7972496508  
O -0.6337653828 -0.3616286882 6.5022598576  
O 1.174401613 0.1100922074 -2.0497921818  
O 1.5721882001 -0.2300877992 6.3044785299  
H 2.2361918904 -0.088713906 3.9784469778  
H -0.7997172123 -0.2756731909 4.0352960039  
H -0.4009542396 -0.3834619622 7.4417367738  
H 2.0447507043 0.2254676298 -2.435922378  
H -0.891595934 -0.1008235995 -1.6648849853  
H 3.3678863826 0.2484370148 -0.5187190932  
H 3.3316729881 0.1324130255 1.9406109743  
H -0.9175332226 -0.2678692615 1.8347701567

LC-BLYP Caffeic Acid (Neutral) -0.006 a.u.

C 1.25571199 0.0616407312 -0.6890032208

C 0.0527931593 -0.1050551025 -0.027887014  
C 0.0338330484 -0.1803767468 1.3366828873  
C 1.2096458571 -0.0909122565 2.0647794324  
C 2.3999307464 0.070228527 1.3868768834  
C 2.4249154558 0.1481887379 0.0127178847  
O -1.093756712 -0.193313897 -0.7385433175  
C 1.2461531004 -0.1575985994 3.5220971582  
C 0.2268145295 -0.2146433122 4.3515008617  
C 0.4969621402 -0.2704407558 5.8006304299  
O -0.6234564037 -0.3128325489 6.5130675678  
O 1.1811158882 0.126795183 -2.0545540681  
O 1.5857616176 -0.2764971862 6.2887702512  
H 2.2313113613 -0.1517545465 3.9760124751  
H -0.8089511986 -0.2174616823 4.044263962  
H -0.3912622166 -0.3445173462 7.4532702968  
H 2.0542953149 0.2712794387 -2.4232541608  
H -0.8833492449 -0.1108718694 -1.6740932829  
H 3.3639478998 0.2768649495 -0.5120077393  
H 3.3223271203 0.1385907682 1.9459676053  
H -0.9196324533 -0.313640486 1.8272891076

LC-BLYP Caffeic Acid (Neutral) -0.008 a.u.

C 1.2539793681 0.06618549 -0.6892534487  
C 0.0528811356 -0.1222200613 -0.0340744816  
C 0.0304145938 -0.2098266207 1.3306116445  
C 1.2022437422 -0.1104366111 2.0632266702  
C 2.3928370715 0.0700954102 1.3890045209  
C 2.4203854323 0.1607895054 0.0164131189  
O -1.0911230052 -0.2205832159 -0.751986178  
C 1.239022002 -0.185570334 3.5207913711  
C 0.221772415 -0.2008349872 4.3534648956  
C 0.5021220395 -0.2698738625 5.803849213  
O -0.6110721808 -0.259966157 6.5237175934  
O 1.1883035146 0.143269744 -2.059106072  
O 1.5968159312 -0.3261016553 6.2729279378  
H 2.2243889013 -0.2197457102 3.9731667318  
H -0.8152714911 -0.156063391 4.0528509482  
H -0.3800002666 -0.3009615184 7.4647427911  
H 2.0615410873 0.3270384448 -2.4089275816  
H -0.8745873499 -0.119705174 -1.6837841665  
H 3.3597163048 0.3054581587 -0.5042366839  
H 3.3122456165 0.1447799864 1.9521507195  
H -0.9215038622 -0.3620554408 1.8190344561

LC-BLYP Gallic Acid (Neutral) -0.010 a.u.

C -0.9442993342 -1.1425110732 0.0020197783

C -1.6714249843 0.0235205663 0.0001991428  
C -1.0335866321 1.2401570759 -0.0041590457  
C 0.3402499848 1.2933746176 -0.0067108056  
C 1.0538735592 0.1175716864 -0.0048858422  
C 0.4199053217 -1.1066690796 -0.0005360855  
O -3.0377434478 -0.0063513096 0.0027937994  
O -1.774955043 2.3732880527 -0.0058168001  
C 2.5410933448 0.0846297597 -0.0074030152  
O 3.092602187 1.2867999916 -0.0108334101  
O -1.6885387869 -2.2886056774 0.0064807576  
O 3.158370364 -0.933888322 -0.0063774063  
H 1.0248945092 -2.004409946 0.0007807023  
H 0.8471045968 2.2466495479 -0.0100166237  
H -1.1106693067 -3.0568416921 0.0083346273  
H -3.2991291432 -0.9340271412 0.0064104249  
H -2.7046120549 2.1267356648 -0.0028727192  
H 4.0584258654 1.1918022781 -0.012113479

LC-BLYP Gallic Acid (Neutral) -0.002 a.u.

C -0.942994 -1.155173 0.002198  
C -1.670193 0.013545 0.000413  
C -1.029064 1.23129 -0.003938  
C 0.343908 1.280847 -0.00651  
C 1.058581 0.104764 -0.004696  
C 0.423377 -1.119932 -0.000345  
O -3.022444 0.005483 0.002865  
O -1.75525 2.364692 -0.005621  
C 2.534676 0.093843 -0.007302  
O 3.077489 1.309107 -0.011308  
O -1.688631 -2.291862 0.006536  
O 3.19799 -0.900429 -0.005999  
H 1.01862 -2.022999 0.000968  
H 0.843598 2.237002 -0.009892  
H -1.130319 -3.073309 0.007909  
H -3.333149 -0.907439 0.005967  
H -2.693024 2.14187 -0.003242  
H 4.03839 1.199924 -0.012711

LC-BLYP Gallic Acid (Neutral) -0.004 a.u.

C -0.9433734359 -1.1519912988 0.0021569224  
C -1.6703907339 0.0160305501 0.0003654439  
C -1.0301203645 1.2334027554 -0.0039871464  
C 0.3430617313 1.2838444045 -0.0065556657  
C 1.0572092995 0.1078369928 -0.0047406221  
C 0.4224742589 -1.1166754239 -0.0003910125  
O -3.026170923 0.0026983422 0.0028491618

O -1.7598668101 2.3668296332 -0.0056644408  
C 2.536136311 0.0915383332 -0.0073271389  
O 3.0808995823 1.3035894731 -0.0111936368  
O -1.6885395501 -2.2910722428 0.0065215473  
O 3.1880308357 -0.9088343619 -0.0060916785  
H 1.0200072693 -2.0184678316 0.0009216964  
H 0.8445778921 2.2392356126 -0.0099183115  
H -1.1251411234 -3.0691189205 0.0080144879  
H -3.3245735957 -0.9140985824 0.0060666107  
H -2.6956712616 2.1382315395 -0.0031639108  
H 4.0430116181 1.1982460253 -0.0125683063

LC-BLYP Gallic Acid (Neutral) -0.006 a.u.

C -0.9437143793 -1.148824781 0.0021139181  
C -1.670659935 0.018521748 0.0003140856  
C -1.0312227896 1.2355867916 -0.0040403464  
C 0.3421705876 1.2869298174 -0.0066043454  
C 1.0559726518 0.1109930517 -0.0047873988  
C 0.4215943101 -1.1133836272 -0.0004381113  
O -3.0299551091 -0.0002064184 0.0028319206  
O -1.764684666 2.3689783932 -0.0057118256  
C 2.5376859004 0.0892364061 -0.0073527408  
O 3.0845482588 1.2980401196 -0.0110754875  
O -1.6884965488 -2.2902650265 0.0065077345  
O 3.1781121222 -0.9172108104 -0.0061869082  
H 1.0215116016 -2.0138651648 0.0008750118  
H 0.8454923465 2.2415848446 -0.0099482913  
H -1.1201523757 -3.0649809406 0.0081206014  
H -3.3160398219 -0.9207546938 0.006174271  
H -2.6984826935 2.1345055216 -0.003077506  
H 4.04788154 1.1963397689 -0.0124205816

LC-BLYP Gallic Acid (Neutral) -0.008 a.u.

C -0.9440215227 -1.1456665822 0.0020682887  
C -1.671003694 0.0210184111 0.000258734  
C -1.032376489 1.237839075 -0.0040976198  
C 0.3412337921 1.29010569 -0.0066560391  
C 1.054863073 0.1142365604 -0.0048358005  
C 0.4207378371 -1.110050135 -0.0004864286  
O -3.0338086715 -0.00322474 0.0028134674  
O -1.7697113295 2.3711326525 -0.0057626878  
C 2.5393347553 0.0869344617 -0.0073781881  
O 3.0884454435 1.2924474493 -0.0109548933  
O -1.6884977096 -2.2894423735 0.0064942222

O 3.1682272321 -0.9255611299 -0.0062829032  
H 1.0231387272 -2.0091821693 0.0008280213  
H 0.8463364558 2.2440545057 -0.0099810436  
H -1.1153339639 -3.0608900854 0.0082273255  
H -3.3075558509 -0.927399503 0.0062892395  
H -2.7014616326 2.1306777116 -0.0029810274  
H 4.0530145476 1.1941952011 -0.0122686672

LC-BLYP Caffeic Acid (Radical) -0.010 a.u.

C 1.2502682431 0.0544623683 -0.7363344892  
C 0.0063270512 -0.0835036444 -0.0002377338  
C -0.0306840646 -0.1390362224 1.3500384056  
C 1.1642023377 -0.0622608206 2.0763246375  
C 2.3912365863 0.0755757334 1.3743017673  
C 2.4484368044 0.1331831474 0.0326509152  
O -1.0753171867 -0.1504920225 -0.7716607922  
C 1.2279992814 -0.1171185174 3.5035357341  
C 0.2101944442 -0.2369085433 4.3527964501  
C 0.5114771939 -0.276936325 5.8056610544  
O -0.58652289 -0.3824981737 6.5301078668  
O 1.1873813512 0.0936188387 -1.9734356848  
O 1.6183625615 -0.220045425 6.2406208213  
H 2.2113887717 -0.0556420236 3.9569616053  
H -0.8272965545 -0.3064294313 4.0581970174  
H -0.3613119091 -0.4022976927 7.4748893501  
H -0.7252978108 -0.0824231009 -1.6796162853  
H 3.3840862586 0.2390728001 -0.4971157401  
H 3.2976995146 0.1348261927 1.9614596936  
H -0.980977984 -0.2426281381 1.8526284067

LC-BLYP Caffeic Acid (Radical) -0.002 a.u.

C 1.2449765061 0.0549680121 -0.7365526919  
C 0.0039680533 -0.0826881733 0.0126602841  
C -0.0107671584 -0.1378413157 1.367823794  
C 1.190277289 -0.0615354269 2.0717744082  
C 2.412477801 0.0731899205 1.3635437356  
C 2.4572594801 0.1304265456 0.0220410204  
O -1.0872800631 -0.1482689189 -0.7268058797  
C 1.2546810809 -0.1137414908 3.506406046  
C 0.2328349029 -0.2362222324 4.3451535258  
C 0.4931300534 -0.2722120056 5.7915350871  
O -0.6295330644 -0.3959292077 6.4958350487  
O 1.1724736479 0.0961756145 -1.9616640253  
O 1.572537176 -0.2004495131 6.2976381317  
H 2.2396440572 -0.0464510258 3.9546761586  
H -0.7975892851 -0.3125161076 4.0316723253

H -0.3964723575 -0.4128216545 7.4349665579  
H -0.7841236003 -0.0844823957 -1.6527041006  
H 3.3838140458 0.2330093224 -0.5237590745  
H 3.3261500216 0.1300851851 1.9396199381  
H -0.9568065865 -0.2401761322 1.8779127105

LC-BLYP Caffeic Acid (Radical) -0.004 a.u.

C 1.2458918504 0.0540864689 -0.736571104  
C 0.004581025 -0.0827896912 0.0100174098  
C -0.0147893006 -0.1379138797 1.3642737696  
C 1.1848389401 -0.0617878448 2.0725401191  
C 2.4078803432 0.0734482953 1.3656042348  
C 2.4551452631 0.1306860885 0.0240550452  
O -1.0848539944 -0.1484977315 -0.7363335996  
C 1.2490816185 -0.11438915 3.5064520243  
C 0.2281211635 -0.2361676685 4.346303417  
C 0.4971178961 -0.272594912 5.7950674044  
O -0.6200536557 -0.3938360451 6.5029449243  
O 1.1750400162 0.096020949 -1.9643987152  
O 1.5830397186 -0.2035779978 6.2846700961  
H 2.2336035054 -0.0481396657 3.9559850249  
H -0.8038297494 -0.3111140141 4.0366919179  
H -0.3904474386 -0.4116394953 7.4437639032  
H -0.7707419201 -0.0842047423 -1.6581927968  
H 3.3836662337 0.2341555624 -0.5182574398  
H 3.3199890478 0.1309624096 1.9440907628  
H -0.9616285625 -0.2401879357 1.8730666019

LC-BLYP Caffeic Acid (Radical) -0.006 a.u.

C 1.2470180882 0.0546567899 -0.7363350799  
C 0.0052318672 -0.0828990018 0.0070470424  
C -0.0195280472 -0.1382389809 1.3601546171  
C 1.1785513716 -0.061850522 2.0735835848  
C 2.4026955029 0.0740595342 1.3681255666  
C 2.4529233681 0.1313763236 0.0266019583  
O -1.0820009224 -0.1489326703 -0.7469712128  
C 1.2427827412 -0.1151740848 3.5059604515  
C 0.2228493041 -0.2365950029 4.3479480141  
C 0.5015379987 -0.2740137294 5.7983006789  
O -0.609824609 -0.3909686025 6.5109495637  
O 1.1785761858 0.0943770395 -1.9671690432  
O 1.5940490437 -0.2074040587 6.2708817944  
H 2.2268768561 -0.0501289079 3.9567210767  
H -0.8107511682 -0.3101413537 4.0428013119  
H -0.3822113897 -0.4089640138 7.4531669972  
H -0.7565405439 -0.0829289364 -1.6645169715

H 3.3836681054 0.2352559696 -0.5118524997  
H 3.3130908682 0.1319472694 1.9492240052  
H -0.9673426207 -0.2409140613 1.8671511444

LC-BLYP Caffeic Acid (Radical) -0.008 a.u.

C 1.2484609206 0.054830766 -0.7362619029  
C 0.0057821776 -0.0834493555 0.0036566754  
C -0.024771017 -0.1392112207 1.3554299358  
C 1.1717618025 -0.0623994392 2.0748407227  
C 2.3971916568 0.0749766245 1.3710317604  
C 2.4506671642 0.1328360293 0.0294727136  
O -1.0787962927 -0.1502414319 -0.7587425328  
C 1.2358227988 -0.1167566499 3.5049878861  
C 0.2168542107 -0.2366664129 4.3500843369  
C 0.5063048917 -0.275656511 5.8018156657  
O -0.5988482996 -0.3851648337 6.5199815062  
O 1.1825199381 0.094826072 -1.9701222192  
O 1.6060451836 -0.2155122418 6.2560409309  
H 2.2196000451 -0.0542207047 3.9570594668  
H -0.8186971951 -0.3073250014 4.0499818696  
H -0.3726703627 -0.4043379773 7.4634887776  
H -0.7413426087 -0.0830527484 -1.6716612383  
H 3.3837097638 0.2382221281 -0.5048073625  
H 3.3056891347 0.1336913663 1.9550342986  
H -0.9736319122 -0.2428694577 1.8604617095

LC-BLYP Gallic Acid (Radical) -0.010 a.u.

C -0.9375246767 -1.1953215858 0.0031379567  
C -1.7291355106 0.0065417479 0.0013884811  
C -1.0077569867 1.2625598589 -0.0034246076  
C 0.351826471 1.3219908564 -0.0063917847  
C 1.0510429742 0.1274058153 -0.0046833925  
C 0.4129691803 -1.1146252412 0.0000471043  
O -2.9647093355 0.0383147809 0.0038073082  
O -1.7894212152 2.3334596098 -0.0047138875  
C 2.5413275205 0.0865030526 -0.0078693846  
O 3.0939318085 1.2852467698 -0.0117440755  
O -1.6213135738 -2.3459029911 0.007832762  
O 3.1443221263 -0.9395921557 -0.0071079889  
H 1.0404594363 -1.9972895421 0.0011533034  
H 0.8730992761 2.2670285689 -0.009953619  
H -1.007713898 -3.0882401068 0.009123968  
H -2.6973105667 1.9780911583 -0.0017689072  
H 4.0609989701 1.1969524039 -0.0135382363

LC-BLYP Gallic Acid (Radical) -0.002 a.u.



C -0.9359505577 -1.2053004404 0.0031713275  
C -1.7280854976 0.0021305776 0.0015232805  
C -1.006170687 1.2596225748 -0.0033947997  
C 0.3553222822 1.3114470414 -0.0063940788  
C 1.0533207794 0.1162457591 -0.0046289482  
C 0.4173239359 -1.127013187 0.0000955225  
O -2.9545519294 0.0300192994 0.0040037061  
O -1.77008206 2.3346291565 -0.0047108419  
C 2.5329011093 0.0950140743 -0.0077226747  
O 3.080283256 1.3053734219 -0.0120988293  
O -1.6286275244 -2.3419954662 0.0077583093  
O 3.1803655676 -0.9083514315 -0.0064998359  
H 1.0357067264 -2.0147404033 0.0012173023  
H 0.871741234 2.258250018 -0.0100364524  
H -1.0393191291 -3.1028084496 0.00873184  
H -2.6910100309 2.0117201999 -0.0018729034  
H 4.0419245255 1.1988802551 -0.013846924

LC-BLYP Gallic Acid (Radical) -0.004 a.u.

C -0.9364160832 -1.2027421487 0.0031619226  
C -1.7282477685 0.0032930995 0.0014900863  
C -1.0064909204 1.2602667513 -0.0034020674  
C 0.3545542257 1.3139077375 -0.0063965952  
C 1.0525489855 0.1188783786 -0.0046457894  
C 0.4162139693 -1.1239200248 0.0000800227  
O -2.9569283501 0.0322460035 0.0039522205  
O -1.7746516679 2.3343634042 -0.0047090373  
C 2.5348655529 0.0928415715 -0.0077598411  
O 3.0833051814 1.3003743417 -0.0120142077  
O -1.6267476822 -2.3429743284 0.0077755752  
O 3.1713469813 -0.9161879805 -0.0066361915  
H 1.03669856 -2.0104625527 0.0011989718  
H 0.8722205511 2.2602210488 -0.0100191835  
H -1.0310824871 -3.0990398376 0.0088286339  
H -2.6923865525 2.0033405342 -0.0018410676  
H 4.0462895048 1.1987170017 -0.0137684525

LC-BLYP Gallic Acid (Radical) -0.006 a.u.

C -0.9368288814 -1.2002337446 0.0031532904  
C -1.7284781947 0.0044163842 0.0014562688  
C -1.0068579701 1.260978633 -0.0034095358  
C 0.3537187647 1.3164864643 -0.0063965948  
C 1.0519148888 0.1216151658 -0.0046598839  
C 0.4151174826 -1.1208284715 0.0000671764  
O -2.95940598 0.0343696143 0.0039017642  
O -1.7793969894 2.3340806014 -0.0047093436

C 2.5369211651 0.0906995521 -0.0077956286  
O 3.0865828076 1.2953575605 -0.0119256561  
O -1.6249044437 -2.3439502236 0.007793795  
O 3.1623369732 -0.924008478 -0.0067857816  
H 1.0378210795 -2.0061318453 0.0011827452  
H 0.8726149806 2.2623395763 -0.0099989438  
H -1.0230858999 -3.095361258 0.0089267979  
H -2.6938942337 1.9949396362 -0.001813822  
H 4.0509164508 1.1983538329 -0.0136916478

LC-BLYP Gallic Acid (Radical) -0.008 a.u.

C -0.9371963908 -1.1977630179 0.0031453442  
C -1.7287738445 0.0054996766 0.00142236  
C -1.0072777069 1.2617458824 -0.0034170741  
C 0.3528113499 1.3191812979 -0.0063948676  
C 1.0514136629 0.124457232 -0.004672248  
C 0.4140351147 -1.117731976 0.0000563049  
O -2.961995724 0.0363929202 0.0038533706  
O -1.7843194428 2.3337795099 -0.0047111004  
C 2.5390727697 0.0885867345 -0.0078317496  
O 3.0901219092 1.2903168392 -0.011835379  
O -1.6230940475 -2.3449259487 0.0078128303  
O 3.1533296779 -0.9318106621 -0.0069437253  
H 1.0390741126 -2.0017423718 0.0011676063  
H 0.8729124675 2.2646076595 -0.0099768842  
H -1.0153022558 -3.0917631064 0.0090253563  
H -2.6955347382 1.9865210404 -0.0017900037  
H 4.0558150862 1.1977712904 -0.0136151405

LC-BLYP Caffeic Acid (Neutral) Zero field

C 1.2604127009 0.0524783538 -0.6875896984  
C 0.0546507757 -0.0779693679 -0.0125466202  
C 0.0458693428 -0.1323127105 1.350853332  
C 1.2306750781 -0.0584915255 2.0689173541  
C 2.4184525702 0.0709514648 1.3827243644  
C 2.435830672 0.1265343001 0.0057672608  
O -1.0956003168 -0.1497655603 -0.7055260184  
C 1.2662568825 -0.1127486282 3.5230283682  
C 0.2434367288 -0.2356453972 4.3464770582  
C 0.4816361114 -0.2715780019 5.7905739799  
O -0.6540740363 -0.3993803997 6.4837247692  
O 1.1605975351 0.0971323616 -2.0391179191  
O 1.5458613027 -0.1979612739 6.3329871158  
H 2.2481345877 -0.0442009466 3.9789992014  
H -0.783016682 -0.3136792007 4.0208146375

H -0.4195059295 -0.4153818429 7.4213491281  
H 2.0201143016 0.1877705795 -2.4569703663  
H -0.9050726423 -0.0960434538 -1.6492336759  
H 3.3719636702 0.2282853932 -0.5283672501  
H 3.3475303798 0.1295107892 1.9321410557  
H -0.9090420327 -0.2338329328 1.8455779232

LC-BLYP Caffeic Acid (Neutral) 0.010 a.u.

C 1.2691480124 0.051484393 -0.6873547922  
C 0.057061794 -0.0716369174 0.0017969939  
C 0.0581816764 -0.1207104824 1.3615814849  
C 1.2523972174 -0.0484291595 2.0763049752  
C 2.4385205957 0.0747554451 1.3797497377  
C 2.4511535334 0.1242628773 0.003053272  
O -1.0903129032 -0.140288429 -0.6746432547  
C 1.2901316175 -0.1007433116 3.5145219593  
C 0.2600714985 -0.2325524094 4.3490998062  
C 0.4634878864 -0.2709240803 5.7746919631  
O -0.6956409809 -0.4218256055 6.4577014063  
O 1.1395629019 0.0879562824 -2.0133196306  
O 1.496088566 -0.18792764 6.3933139528  
H 2.2742574244 -0.0256594841 3.9658973369  
H -0.7590866992 -0.3207076144 4.0062035176  
H -0.436780279 -0.4403663395 7.3856468228  
H 1.9674481702 0.1631628058 -2.500481734  
H -0.9290541341 -0.0997116552 -1.6280167709  
H 3.3825531614 0.2193069438 -0.5388365994  
H 3.3729947881 0.1316087467 1.9213606383  
H -0.8970728473 -0.2173823657 1.8563129147

LC-BLYP Caffeic Acid (Neutral) 0.002 a.u.

C 1.26195835 0.0516168126 -0.6871136026  
C 0.0554715988 -0.0748075174 -0.0085072267  
C 0.0493985262 -0.1266535739 1.3542246875  
C 1.2365353924 -0.0542423427 2.0702925818  
C 2.4234137731 0.0717374336 1.3818882523  
C 2.4389578546 0.1245669499 0.0044615806  
O -1.0950568327 -0.1449002279 -0.6970284674  
C 1.2722348484 -0.1073894808 3.5223071312  
C 0.2479140473 -0.2365406336 4.3458675972  
C 0.4771667957 -0.2714049729 5.786998219  
O -0.6636329113 -0.4099610986 6.4759637145  
O 1.1546988013 0.0934251684 -2.0338635617  
O 1.5340542057 -0.1905645454 6.3458595932  
H 2.253783775 -0.0331624798 3.978216141  
H -0.7762285781 -0.3216419703 4.015438278

H -0.4257226238 -0.4252269354 7.4120168258  
H 2.0082468044 0.1767350843 -2.4664118  
H -0.9106926182 -0.0955578806 -1.642859174  
H 3.3739886465 0.2232060372 -0.5316982671  
H 3.3540636446 0.129332281 1.9289416345  
H -0.9054425 -0.2248941077 1.8495898631

LC-BLYP Caffeic Acid (Neutral) 0.004 a.u.

C 1.2635662529 0.0513422317 -0.6868902082  
C 0.0562262274 -0.0732051185 -0.0051026951  
C 0.052639674 -0.1237646224 1.3569742155  
C 1.2418068662 -0.05182485 2.0716224946  
C 2.4279630486 0.0725412028 1.3811641475  
C 2.4419345884 0.1238970172 0.0035275055  
O -1.0940921818 -0.1425276827 -0.6896636929  
C 1.2777310077 -0.1045489494 3.5211336943  
C 0.2518378627 -0.2361907034 4.3457552214  
C 0.4731406236 -0.2713944507 5.7838119148  
O -0.6726092443 -0.4155022164 6.4695112609  
O 1.1495132452 0.0913213781 -2.0286373133  
O 1.5232600501 -0.1876126577 6.3583773557  
H 2.2595232799 -0.0283465259 3.976411595  
H -0.7705847113 -0.3240456148 4.0113029806  
H -0.4312029556 -0.4309686789 7.4039938399  
H 1.9967298977 0.1706968141 -2.4754836246  
H -0.9158711894 -0.0961515947 -1.6375155992  
H 3.375830843 0.2209154249 -0.5345193344  
H 3.3599343249 0.1297058036 1.9262295912  
H -0.9021665098 -0.2206642071 1.8525806506

LC-BLYP Caffeic Acid (Neutral) 0.006 a.u.

C 1.2653066355 0.0513797657 -0.686826385  
C 0.0567872521 -0.0724575257 -0.0022221531  
C 0.0552284003 -0.1223884367 1.3591144858  
C 1.2462652114 -0.0504179489 2.0730394091  
C 2.4319605639 0.0733290639 1.380612972  
C 2.4448983911 0.1239229331 0.002960019  
O -1.0929010385 -0.1414965074 -0.6835085897  
C 1.2825790004 -0.1030099681 3.5194752641  
C 0.2551381255 -0.235052053 4.3462312577  
C 0.469536864 -0.2712787154 5.7807017711  
O -0.6809895031 -0.4183605638 6.4642810271  
O 1.1451559908 0.0900608285 -2.0234742456  
O 1.5134308619 -0.1871104651 6.3703489445  
H 2.2649498423 -0.0268430368 3.9737806122  
H -0.7659732744 -0.3233337936 4.0084087298

H -0.4349606711 -0.4346941156 7.3969060979  
H 1.9859191989 0.1673177793 -2.4841672551  
H -0.9204887099 -0.0973344457 -1.6332629462  
H 3.3778124309 0.2201200047 -0.536602397  
H 3.3650273081 0.1303379045 1.9240637988  
H -0.89957188 -0.2190187039 1.8547235826

LC-BLYP Caffeic Acid (Neutral) 0.008 a.u.

C 1.2671673808 0.0514275318 -0.6869651571  
C 0.0570832551 -0.07194502 0.0000905827  
C 0.0570915246 -0.1213837006 1.3606674852  
C 1.2498121143 -0.0492820402 2.0745951407  
C 2.4354739597 0.0740809029 1.3801704628  
C 2.4479519109 0.1240561198 0.002802311  
O -1.0916234963 -0.1407904504 -0.6784970245  
C 1.2867076275 -0.1017325661 3.5172972311  
C 0.2578825421 -0.2338033267 4.3473152199  
C 0.4663400848 -0.2711334852 5.7776536166  
O -0.6886569251 -0.420429356 6.4602880892  
O 1.1417951767 0.088926625 -2.0183629615  
O 1.5043915452 -0.1873027094 6.3819396513  
H 2.2698593554 -0.026020585 3.9703150891  
H -0.7621419189 -0.322133679 4.0066718152  
H -0.4368479505 -0.4377993068 7.3907513133  
H 1.9761007901 0.1648483042 -2.4924832085  
H -0.9248395348 -0.0985504188 -1.6300869242  
H 3.3800371693 0.2195994046 -0.538032098  
H 3.3693804231 0.1309928565 1.9224613203  
H -0.8978540342 -0.2179531008 1.8559920453

LC-BLYP Gallic Acid (Neutral) Zero field

C -0.9425689036 -1.1583751222 0.0022362189  
C -1.6700658504 0.011065172 0.0004575719  
C -1.0280493776 1.22925432 -0.0038924016  
C 0.3447081456 1.277936365 -0.0064676475  
C 1.0600977975 0.1017716766 -0.0046525344  
C 0.4243008292 -1.1231587184 -0.0003002421  
O -3.0187617453 0.0081369214 0.0028806848  
O -1.7508270708 2.3625705989 -0.0055800614  
C 2.5332931073 0.0961522815 -0.0072771279  
O 3.0743094117 1.3146066717 -0.0114187473  
O -1.6887776535 -2.2926327792 0.0065515926  
O 3.2079987558 -0.8919911645 -0.0059090597  
H 1.0173434861 -2.0274684264 0.0010141541  
H 0.8425550776 2.2348811908 -0.0098678283  
H -1.1357067912 -3.0775564628 0.0078040694

H -3.3417566506 -0.9007862264 0.0058742704  
H -2.6905368491 2.1454385934 -0.0033111618  
H 4.0340052816 1.2013801088 -0.0128477501

LC-BLYP Gallic Acid (Neutral) 0.010 a.u.

C -0.9394871461 -1.1749857647 0.0023985575  
C -1.6703970723 -0.0011876263 0.0006281601  
C -1.0234556773 1.2205078242 -0.0037202539  
C 0.347901317 1.264763173 -0.0062928872  
C 1.0702392632 0.087993318 -0.0044582733  
C 0.4291545701 -1.1390554191 -0.0000917301  
O -3.0005633303 0.0189813815 0.0029223391  
O -1.7314684186 2.3525646966 -0.0054335896  
C 2.5271330905 0.107823203 -0.0071553321  
O 3.0617047141 1.3422258937 -0.0118456117  
O -1.6905104131 -2.2961194732 0.0066334033  
O 3.2589702375 -0.8493894341 -0.0056059683  
H 1.0124784696 -2.0491037564 0.0012307941  
H 0.8364018567 2.2259679821 -0.0097816953  
H -1.166580052 -3.0998415959 0.0073509417  
H -3.3847369687 -0.868258537 0.0055377295  
H -2.6804739909 2.1629465443 -0.0035792967  
H 4.0152505508 1.2053925901 -0.0134432871

LC-BLYP Gallic Acid (Neutral) 0.002 a.u.

C -0.9421149834 -1.1616184288 0.0022907958  
C -1.6700527802 0.0085283438 0.0004512641  
C -1.0272052488 1.2272909156 -0.0037536595  
C 0.3453194413 1.2751043329 -0.0061208183  
C 1.0617323131 0.0989365608 -0.0042217648  
C 0.4252405124 -1.1262098666 -0.0000287231  
O -3.0151316462 0.0106065928 0.0026462515  
O -1.7468111462 2.3603118434 -0.0055100804  
C 2.5321570274 0.0984950138 -0.0065814694  
O 3.0718954963 1.3197525893 -0.0118836895  
O -1.6889349602 -2.293252884 0.0064352994  
O 3.2182137212 -0.8834906669 -0.006024484  
H 1.0160987348 -2.0317980843 0.0013560595  
H 0.841149092 2.2329552755 -0.0094221273  
H -1.1413677045 -3.0818118732 0.0076044461  
H -3.3506294823 -0.8941075488 0.0054481378  
H -2.6884664768 2.1489050986 -0.0034951464  
H 4.0304690901 1.2026277861 -0.0138962917

LC-BLYP Gallic Acid (Neutral) 0.004 a.u.

C -0.9415516187 -1.164859682 0.0023049535

C -1.6700270777 0.0061350035 0.0005337479  
C -1.0261305084 1.2254390265 -0.0038135228  
C 0.3461591147 1.2724037219 -0.0063899451  
C 1.0635998247 0.0960397797 -0.004570402  
C 0.426202873 -1.1295391667 -0.0002153812  
O -3.0114972584 0.0129960796 0.0029021589  
O -1.7425415072 2.3584261374 -0.0055109529  
C 2.5307088339 0.1007659212 -0.0072273097  
O 3.068624802 1.3255800253 -0.0116122663  
O -1.6892352595 -2.2941214525 0.0065800608  
O 3.228140744 -0.8750701681 -0.0057627288  
H 1.0151136915 -2.0362310007 0.0011004886  
H 0.8402703172 2.2309996139 -0.0098250149  
H -1.147133053 -3.0862333947 0.0076191735  
H -3.3590116626 -0.8875799925 0.0057148285  
H -2.6860354627 2.1524504242 -0.0034314171  
H 4.0259042071 1.203624124 -0.0131024709

LC-BLYP Gallic Acid (Neutral) 0.006 a.u.

C -0.9409452172 -1.1681740514 0.0023369439  
C -1.6700885629 0.0036822732 0.0005676153  
C -1.0252125652 1.2236772858 -0.0037793396  
C 0.3468086804 1.2697619205 -0.0063553486  
C 1.0656133237 0.0932801548 -0.0045320153  
C 0.4271783518 -1.1327161519 -0.0001742151  
O -3.0078689417 0.0151879367 0.0029107242  
O -1.7386692455 2.3564125599 -0.0054818022  
C 2.5294880085 0.1031029559 -0.0072036854  
O 3.066091942 1.3310971905 -0.0116981949  
O -1.6895785045 -2.2948234747 0.0065958507  
O 3.2383248307 -0.8665426109 -0.0057003378  
H 1.0141508808 -2.0405519766 0.0011428951  
H 0.8390536915 2.2292088337 -0.0098080461  
H -1.1532884708 -3.090688977 0.0075295345  
H -3.3676252525 -0.8810447284 0.005647949  
H -2.6840192865 2.1559229648 -0.0034838737  
H 4.0221473373 1.204432895 -0.013220654

LC-BLYP Gallic Acid (Neutral) 0.008 a.u.

C -0.9402612899 -1.1715448198 0.002368049  
C -1.6702104534 0.0012410259 0.0005988024  
C -1.0243204138 1.2220282504 -0.0037483881  
C 0.3473936706 1.2672136193 -0.0063227908  
C 1.067819431 0.0905970251 -0.0044943858  
C 0.4281638575 -1.1358863984 -0.0001329572

O -3.0042287727 0.0171936594 0.0029169007  
O -1.734975692 2.3544540375 -0.0054563339  
C 2.52829903 0.1054534137 -0.0071793459  
O 3.0637763021 1.3366405742 -0.0117750225  
O -1.6900005871 -2.2954913824 0.0066135377  
O 3.2485921137 -0.8579851635 -0.0056501177  
H 1.0132747307 -2.044840608 0.0011863455  
H 0.8377683619 2.2275303465 -0.0097931932  
H -1.1597550133 -3.0952205465 0.0074413288  
H -3.3762032893 -0.8745919966 0.0055888044  
H -2.6821608643 2.1594066123 -0.0035330856  
H 4.0185898783 1.2050273509 -0.0133341477

LC-BLYP Caffeic Acid (Radical) Zero field

C 1.2443641112 0.0548477485 -0.7369127476  
C 0.0031552184 -0.0825970688 0.0149302124  
C -0.0072181474 -0.1375208031 1.3709073511  
C 1.1952554248 -0.0613356538 2.0711691981  
C 2.4169251585 0.0728096955 1.3616219266  
C 2.459528287 0.1299183257 0.0201937993  
O -1.0895265499 -0.1479513802 -0.7180607617  
C 1.2597601673 -0.1129513779 3.5059280513  
C 0.2370695626 -0.2359230712 4.344392676  
C 0.4894086518 -0.2713544853 5.7884428672  
O -0.6382780119 -0.3982871978 6.4896571279  
O 1.1703020663 0.0972608277 -1.9592128338  
O 1.5625596832 -0.1974980052 6.3102547104  
H 2.2452883441 -0.044664455 3.9528375945  
H -0.791972899 -0.3134895614 4.0273198271  
H -0.4017064546 -0.4148177684 7.427127441  
H -0.796834063 -0.0855279116 -1.6477454596  
H 3.3842317907 0.2319300493 -0.5288839593  
H 3.3319778532 0.1292764532 1.9356462755  
H -0.952638193 -0.2396053602 1.8821597037

LC-BLYP Caffeic Acid (Radical) 0.010 a.u.

C 1.2463360313 0.0552603381 -0.740240442  
C -0.0025553815 -0.0824760105 0.0211913871  
C -0.0002435977 -0.1357815004 1.3794362274  
C 1.2078949718 -0.0598117152 2.0718737135  
C 2.4334625013 0.0719128726 1.3548315871  
C 2.473046916 0.1277328864 0.0164250709  
O -1.0951831505 -0.146734582 -0.6895703952  
C 1.2755172503 -0.1083435485 3.4960964346  
C 0.2499020229 -0.2339264507 4.3481588702  
C 0.4752426069 -0.2678127176 5.7731629616



O -0.6716615209 -0.4083197468 6.473857355  
O 1.1693666665 0.1004883213 -1.9485436263  
O 1.5216090849 -0.1875495507 6.3653813241  
H 2.2650858347 -0.0362550896 3.9339575984  
H -0.7744769742 -0.3174586306 4.0202591117  
H -0.4020112182 -0.4239461538 7.3990200943  
H -0.8482208101 -0.0899616142 -1.6357926995  
H 3.3916075646 0.226207964 -0.5443757706  
H 3.3518654947 0.1260507643 1.9243833345  
H -0.9449322928 -0.2367568362 1.8922608632

LC-BLYP Caffeic Acid (Radical) 0.002 a.u.

C 1.2440617786 0.0551285714 -0.7371939052  
C 0.0023144324 -0.0825301905 0.0168365545  
C -0.0044106168 -0.1372357959 1.3734607152  
C 1.1993934755 -0.0610261647 2.0708250116  
C 2.4208885048 0.072570078 1.360028355  
C 2.4618341714 0.1295127309 0.0187650841  
O -1.0913963648 -0.1477393402 -0.7104223889  
C 1.2641319171 -0.1121073683 3.5049754037  
C 0.2407009939 -0.2355941152 4.3441359201  
C 0.4860309513 -0.2705849113 5.7852770859  
O -0.6462503368 -0.4004070873 6.4844578906  
O 1.1689559605 0.0978113709 -1.9568433924  
O 1.5532123567 -0.1951213781 6.3221477359  
H 2.2502579733 -0.0429516784 3.9504612167  
H -0.7870984003 -0.3143494697 4.0239992691  
H -0.4049030464 -0.4166435969 7.4199640119  
H -0.8087392378 -0.0863614853 -1.643713642  
H 3.3849356332 0.2307884932 -0.5331984439  
H 3.3371147738 0.1285484346 1.9323134513  
H -0.9493829196 -0.2391880971 1.8854970668

LC-BLYP Caffeic Acid (Radical) 0.004 a.u.

C 1.2440664889 0.0553845772 -0.7375891249  
C 0.0013408583 -0.0824885519 0.0184254408  
C -0.0022473935 -0.1369456492 1.3755811874  
C 1.2028080169 -0.0607182322 2.0706932473  
C 2.4245268982 0.0723823041 1.3586464667  
C 2.4642702179 0.1291396103 0.017699811  
O -1.0929285554 -0.1475550427 -0.7037129838  
C 1.2678846407 -0.1112763894 3.5035438191  
C 0.2438006845 -0.2352493692 4.3442973606  
C 0.4829561813 -0.2698863166 5.7821667888  
O -0.6535165955 -0.4023250582 6.4801704895  
O 1.1681907727 0.0983959024 -1.9545696043

O 1.5444696484 -0.1931130904 6.3334933754  
H 2.2547176585 -0.0413574061 3.9474362641  
H -0.7829211851 -0.3151194346 4.0215582708  
H -0.4066302504 -0.4183310892 7.413528559  
H -0.8198708607 -0.0872554886 -1.6404258571  
H 3.3859424482 0.22971708 -0.5368909052  
H 3.3417129539 0.1278931181 1.9295530713  
H -0.946920628 -0.2387724738 1.8881673234

LC-BLYP Caffeic Acid (Radical) 0.006 a.u.

C 1.2444003068 0.0556530664 -0.7381935303  
C 0.0001948266 -0.0824813364 0.0196687728  
C -0.0007495078 -0.1366791497 1.3772823622  
C 1.2054632548 -0.0604304822 2.0707826301  
C 2.4278640486 0.0722517982 1.3573959424  
C 2.4669037762 0.1288235221 0.016968638  
O -1.0941096336 -0.1474053742 -0.6979425824  
C 1.2710418291 -0.1104797519 3.5016237219  
C 0.2463995262 -0.2349019424 4.3449660055  
C 0.4801490947 -0.2692597388 5.7791323761  
O -0.6601896588 -0.4040041105 6.4768807043  
O 1.1680353756 0.0990245992 -1.9524382074  
O 1.5363033315 -0.1914916549 6.3444391367  
H 2.2587080217 -0.0399113528 3.9437042064  
H -0.7794112924 -0.3158060709 4.0200740033  
H -0.4068794251 -0.4198400736 7.4078534123  
H -0.8302997125 -0.0881921597 -1.6379392819  
H 3.3873189565 0.2287472732 -0.5399960157  
H 3.3457753321 0.1273091456 1.9273228104  
H -0.9452664501 -0.2384072067 1.8901878953

LC-BLYP Caffeic Acid (Radical) 0.008 a.u.

C 1.245254285 0.0547283389 -0.7390523774  
C -0.0010786521 -0.0824098746 0.0205842772  
C -0.0001547098 -0.1360913197 1.3785106313  
C 1.2070973766 -0.0602245232 2.0711889374  
C 2.4307795585 0.0719733412 1.3561903464  
C 2.469804436 0.1282025534 0.016597279  
O -1.0948751813 -0.1469554048 -0.6933324072  
C 1.2735118372 -0.1095197136 3.499137276  
C 0.248374535 -0.2344168289 4.3462622369  
C 0.4776357582 -0.2684706642 5.7761309549  
O -0.6660944075 -0.4061768507 6.4747863893  
O 1.1684345381 0.1005055125 -1.9503696699  
O 1.5287558671 -0.1894162614 6.354960759  
H 2.262081039 -0.0382279944 3.9392164111

H -0.77666215 -0.3165610322 4.0197227175  
H -0.4051507899 -0.421917314 7.4030228717  
H -0.8395796038 -0.089639512 -1.6364938339  
H 3.3891659815 0.2277137502 -0.5424169971  
H 3.3490727264 0.1267068393 1.9256780524  
H -0.9447204444 -0.2372840417 1.8914491453

LC-BLYP Gallic Acid (Radical) Zero field

C -0.935420728 -1.2079259816 0.0031815602  
C -1.7279982316 0.0009288345 0.0015559347  
C -1.0058907439 1.2590604727 -0.0033875545  
C 0.35602737 1.3091050018 -0.0063882655  
C 1.0542388876 0.1137152289 -0.0046080576  
C 0.4184493634 -1.1301175347 0.0001144897  
O -2.9522651021 0.0276801007 0.0040550371  
O -1.7656828123 2.3348801648 -0.0047147385  
C 2.5310193695 0.0972226265 -0.0076817137  
O 3.0775112761 1.3103694229 -0.0121815562  
O -1.6305481775 -2.3410085303 0.007741139  
O 3.1894031945 -0.9004940515 -0.0063750481  
H 1.0348466846 -2.0189756722 0.001238617  
H 0.8711870871 2.2564243794 -0.0100496579  
H -1.0478367048 -3.1066833091 0.0086349554  
H -2.6897596155 2.020082578 -0.0019094648  
H 4.0378108826 1.1988592691 -0.0139306763

LC-BLYP Gallic Acid (Radical) 0.010 a.u.

C -0.9313042359 -1.2225942532 0.0032506285  
C -1.7287188595 -0.005680612 0.0017427196  
C -1.0046971955 1.2578340038 -0.0033646504  
C 0.3587790794 1.2992993515 -0.0063530692  
C 1.0614230281 0.1025582618 -0.0044846183  
C 0.4243557129 -1.1462055773 0.0002418842  
O -2.9416760509 0.0140494038 0.0043525821  
O -1.7459098951 2.336027335 -0.0047692244  
C 2.5220730591 0.1090654191 -0.0074794187  
O 3.0669327835 1.3362622397 -0.0125364288  
O -1.6408510575 -2.3358333155 0.007672809  
O 3.2351665716 -0.8605878117 -0.0058928891  
H 1.0325390323 -2.0399096794 0.001363048  
H 0.8676427842 2.2494907964 -0.0101226199  
H -1.0957995234 -3.1280303489 0.0081403904  
H -2.6850687472 2.0616276326 -0.0021301477  
H 4.020205514 1.1957501544 -0.0143359955

LC-BLYP Gallic Acid (Radical) 0.002 a.u.

C -0.9348108878 -1.2106379909 0.0031927976  
C -1.7279917933 -0.0003130091 0.0015889409  
C -1.0056421297 1.2585928263 -0.003380614  
C 0.3566739528 1.3068823322 -0.0063798694  
C 1.0553150509 0.111284706 -0.0045833957  
C 0.4195932903 -1.1332450642 0.0001369622  
O -2.950053967 0.025213048 0.0041067543  
O -1.7614432243 2.3351206667 -0.0047210078  
C 2.5292007066 0.0994781294 -0.0076365777  
O 3.0749813013 1.3153901927 -0.0122626561  
O -1.6325135106 -2.3400080875 0.007724082  
O 3.198472987 -0.8925997392 -0.0062608593  
H 1.0341185368 -2.0231819007 0.0012630011  
H 0.870565849 2.2547428253 -0.0100599477  
H -1.0566816276 -3.1106831704 0.0085367915  
H -2.6886250335 2.028436186 -0.0019500832  
H 4.0339324988 1.1986510494 -0.0140193188

LC-BLYP Gallic Acid (Radical) 0.004 a.u.

C -0.9341059016 -1.2134499986 0.0032051761  
C -1.7280649568 -0.0015955336 0.0016232351  
C -1.0054126339 1.2582275296 -0.0033742251  
C 0.3572661527 1.3047833342 -0.0063700735  
C 1.056560469 0.108953628 -0.0045562476  
C 0.4207570342 -1.1364066689 0.0001623291  
O -2.9479034527 0.0226075822 0.0041600234  
O -1.757351117 2.3353558809 -0.0047295023  
C 2.5274168565 0.1017897585 -0.007589785  
O 3.0726791983 1.3204671438 -0.012341848  
O -1.6345250317 -2.3389917138 0.0077076093  
O 3.2075819842 -0.8846546669 -0.0061551701  
H 1.033521589 -2.0273702443 0.0012896064  
H 0.8698853746 2.2532066616 -0.0100694653  
H -1.0658840135 -3.1148182095 0.0084368829  
H -2.6875935205 2.0367814905 -0.0019936365  
H 4.0302639692 1.1982370263 -0.0141099089

LC-BLYP Gallic Acid (Radical) 0.006 a.u.

C -0.9332938976 -1.2163709167 0.0032190675  
C -1.7282115463 -0.0029180901 0.0016600906  
C -1.0051876926 1.2579713237 -0.0033692628  
C 0.3578095814 1.3028154028 -0.006361601  
C 1.0579850721 0.1067226335 -0.0045299695  
C 0.4219393337 -1.1396120954 0.0001887558  
O -2.9457988806 0.019868866 0.004217472  
O -1.753398607 2.3355879027 -0.0047405418

C 2.5256432692 0.1041592446 -0.0075473445  
O 3.0705833288 1.3256243737 -0.0124143355  
O -1.6365835935 -2.337959053 0.0076937476  
O 3.2167300145 -0.8766618364 -0.0060596433  
H 1.0330566186 -2.0315482477 0.0013159007  
H 0.8691590121 2.2518185704 -0.0100820194  
H -1.0754566884 -3.1190876099 0.0083373822  
H -2.6866558682 2.0451044352 -0.0020387533  
H 4.0267725438 1.1976080967 -0.0141939454

LC-BLYP Gallic Acid (Radical) 0.008 a.u.

C -0.9323643057 -1.2194124812 0.0032342572  
C -1.7284283558 -0.0042795806 0.001700186  
C -1.0049529435 1.2578348048 -0.0033660936  
C 0.3583113776 1.3009854918 -0.0063564996  
C 1.0596007534 0.1045909672 -0.0045067382  
C 0.4231388127 -1.14287345 0.0002149835  
O -2.9437271567 0.0170119334 0.0042819126  
O -1.7495837634 2.335814247 -0.004753575  
C 2.5238652544 0.1065840531 -0.007511813  
O 3.0686715914 1.3308816037 -0.0124798234  
O -1.6386913603 -2.3369081592 0.0076824156  
O 3.2259205781 -0.8686355154 -0.005970347  
H 1.0327269939 -2.0357245609 0.0013400996  
H 0.8684052418 2.2505798149 -0.0101005916  
H -1.0854162077 -3.1234895866 0.008238193  
H -2.6858112828 2.0533889089 -0.0020835779  
H 4.0234267724 1.1967745089 -0.0142679882

LC- $\omega$ PBE Caffeic Acid (Neutral) -0.010 a.u.

C 1.2527800412 0.0753268722 -0.7041299718  
C 0.0499574767 -0.1594411882 -0.0550732428  
C 0.0256478387 -0.2729991509 1.316585678  
C 1.1952387431 -0.1517978591 2.0602129153  
C 2.390065523 0.0712633398 1.389370738  
C 2.4198446009 0.1878950691 0.0138413589  
O -1.0982688441 -0.2803075211 -0.779238743  
C 1.2319520405 -0.2468816991 3.5234243703  
C 0.2160931846 -0.1697344776 4.3659748136  
C 0.5052609596 -0.2691148114 5.824857428  
O -0.6016537806 -0.148239204 6.5533811714  
O 1.2022738513 0.1776601476 -2.0836677519  
O 1.6015953271 -0.4338063765 6.2762567499  
H 2.2142805714 -0.3694594099 3.9714585009  
H -0.8147631768 -0.0207921488 4.0698321367  
H -0.3641268572 -0.2110767823 7.4904310007

H 2.0678373995 0.4512926134 -2.3872203895  
H -0.8726714472 -0.1377330896 -1.7015530031  
H 3.3597969405 0.3662191169 -0.5002371028  
H 3.3067768339 0.1607189946 1.9584270914  
H -0.9228062262 -0.4653204353 1.8016502518

LC- $\omega$ PBE Caffeic Acid (Neutral) -0.002 a.u.

C 1.2602141095 0.0531697697 -0.7044794457  
C 0.0477098417 -0.0797071392 -0.0308669501  
C 0.0358163943 -0.1354796822 1.3410322549  
C 1.222271943 -0.0609131207 2.0666062637  
C 2.4181607414 0.0708585312 1.3799199815  
C 2.4392968441 0.1280103111 -0.0021045151  
O -1.1111036205 -0.1531375628 -0.7259158597  
C 1.2588742988 -0.115733913 3.5285764986  
C 0.2336778033 -0.2366996998 4.3595886533  
C 0.4865297297 -0.2719996425 5.8130111198  
O -0.6514978049 -0.3949762646 6.5134268132  
O 1.1751098539 0.1003902532 -2.0668503076  
O 1.5634801575 -0.2023967685 6.3398790412  
H 2.2433865142 -0.0488621328 3.9830519859  
H -0.7968315985 -0.3122236667 4.0394166977  
H -0.4070610018 -0.4101293556 7.4475891082  
H 2.0490295466 0.1955698371 -2.4481440471  
H -0.907757571 -0.0953999602 -1.6644408462  
H 3.3797064344 0.2316115338 -0.5328199014  
H 3.347317648 0.1301404786 1.932864097  
H -0.9212192637 -0.2384198061 1.8352433579

LC- $\omega$ PBE Caffeic Acid (Neutral) -0.004 a.u.

C 1.2575742802 0.0651173604 -0.7042530077  
C 0.0484617451 -0.1037696089 -0.0362004976  
C 0.0347289503 -0.1799271937 1.3354498325  
C 1.2172302259 -0.0894607383 2.0647063081  
C 2.4118301566 0.0735262107 1.3815661182  
C 2.4338426232 0.1526786558 0.0011430039  
O -1.1081307307 -0.1944347044 -0.7375153502  
C 1.2547042732 -0.1576194578 3.5273462242  
C 0.2278442158 -0.2119303671 4.3615382135  
C 0.4910420769 -0.2719247498 5.8159899777  
O -0.6448011052 -0.3145156183 6.52403523  
O 1.179774109 0.1303192403 -2.0708220672  
O 1.5782655603 -0.2816887927 6.3233168253  
H 2.2424629074 -0.1558081496 3.9796243485

H -0.8078626139 -0.2100330028 4.048469265  
H -0.4008882562 -0.3497226406 7.4584688806  
H 2.0561931743 0.259546758 -2.4350933382  
H -0.8994693148 -0.1158219658 -1.6727883657  
H 3.3734538661 0.2825428178 -0.5257971679  
H 3.3382391414 0.1424481562 1.9378589732  
H -0.919384285 -0.3158502094 1.827540594

LC- $\omega$ PBE Caffeic Acid (Neutral) -0.006 a.u.

C 1.255003229 0.0732229377 -0.7038532975  
C 0.0489248617 -0.1239938571 -0.0417083723  
C 0.0328592565 -0.2160641951 1.3298148385  
C 1.2112700253 -0.1127280127 2.0630924535  
C 2.4050655864 0.0755481622 1.3837427992  
C 2.4283757938 0.1715532338 0.0050369946  
O -1.1051650436 -0.2284035218 -0.7498113655  
C 1.2489458968 -0.1927134947 3.5261152586  
C 0.2239257478 -0.1928402175 4.3628685306  
C 0.4953220253 -0.2720537375 5.818769703  
O -0.6334135766 -0.2481698864 6.5335727232  
O 1.1851473922 0.1528920526 -2.0746132503  
O 1.5874040083 -0.3471474423 6.3073786555  
H 2.2362209065 -0.2438872836 3.9766411281  
H -0.8117952166 -0.1282597385 4.055604339  
H -0.3920120799 -0.2979768644 7.4687482001  
H 2.0626688013 0.317205474 -2.4209137485  
H -0.8911189237 -0.1303623799 -1.6815165803  
H 3.3674083362 0.3224675505 -0.517984984  
H 3.3285490719 0.1527033812 1.9436914026  
H -0.9184750988 -0.3773201607 1.8199085717

LC- $\omega$ PBE Caffeic Acid (Neutral) -0.008 a.u.

C 1.2532712216 0.0766189662 -0.7038379101  
C 0.0491410748 -0.1407408183 -0.0478881388  
C 0.0295059911 -0.2441021101 1.3236878435  
C 1.2037271319 -0.1313713411 2.0616879954  
C 2.3976993239 0.0753845047 1.3863196574  
C 2.4236186631 0.1828748807 0.0091992077  
O -1.1022595947 -0.2546286573 -0.7635151221  
C 1.2411856416 -0.220029382 3.5248912053  
C 0.220070293 -0.1801577757 4.3643872762  
C 0.5001236726 -0.2715902414 5.8217620412  
O -0.6187209204 -0.1976175625 6.5433783478  
O 1.1925564444 0.1674573258 -2.0789389124

O 1.5950522655 -0.3942001219 6.2917596218  
H 2.226461461 -0.3093528528 3.9740318701  
H -0.8138117443 -0.0706329532 4.0627278542  
H -0.3794593629 -0.2556675468 7.4794340412  
H 2.0685761771 0.3731925573 -2.4057573385  
H -0.8824419251 -0.1370107856 -1.6911353904  
H 3.3628585524 0.3488023583 -0.5095990373  
H 3.3180269482 0.1589490909 1.9504471146  
H -0.9200703148 -0.4225055353 1.8115417734

LC- $\omega$ PBE Gallic Acid (Neutral) -0.010 a.u.

C -0.950400203 -1.1491175793 0.002047241  
C -1.6841228628 0.021837541 0.0001703878  
C -1.0422505152 1.2456436229 -0.0041210646  
C 0.3383770911 1.2996961687 -0.0065435976  
C 1.0578711866 0.1195787755 -0.0046546662  
C 0.4211935341 -1.1101376338 -0.0003895757  
O -3.0571103238 -0.0069967723 0.002633445  
O -1.781217204 2.3879388836 -0.0058573443  
C 2.55390762 0.0832154222 -0.0069865558  
O 3.1077479781 1.2922099685 -0.0109864417  
O -1.6916973912 -2.3038491118 0.0064349132  
O 3.1725302085 -0.9411172692 -0.0066171054  
H 1.0269330842 -2.0094378792 0.0009787365  
H 0.8429938186 2.2558427476 -0.0097736182  
H -1.0973595605 -3.0575207142 0.0083081855  
H -3.3082792073 -0.9357363236 0.0062845356  
H -2.7077495952 2.134873903 -0.0029508705  
H 4.0701933419 1.1843012505 -0.0126826046

LC- $\omega$ PBE Gallic Acid (Neutral) -0.002 a.u.

C -0.9493963934 -1.1619329919 0.0022320975  
C -1.6830235824 0.0119856533 0.0004153947  
C -1.0375957049 1.2368454127 -0.0039027294  
C 0.3422926598 1.286862518 -0.0064015648  
C 1.0624135021 0.1062473303 -0.0045532203  
C 0.4243807345 -1.1238901591 -0.0002492927  
O -3.0415329592 0.0053362563 0.0027888778  
O -1.7610153555 2.3792566572 -0.0056420124  
C 2.5469002552 0.0924009324 -0.0070623748  
O 3.0916930377 1.315047391 -0.0114552451  
O -1.6921932364 -2.3070945892 0.0065317328  
O 3.2120477114 -0.9073438212 -0.0061290767  
H 1.0203002528 -2.0286816808 0.0010912899



H 0.8403246132 2.2457224662 -0.009738745  
H -1.116259149 -3.0738169552 0.007884447  
H -3.3416412461 -0.9091415816 0.0058513151  
H -2.6955749257 2.1501359384 -0.0033046473  
H 4.0494407858 1.193286223 -0.0130622462

LC- $\omega$ PBE Gallic Acid (Neutral) -0.004 a.u.

C -0.9497061354 -1.158701464 0.0021897387  
C -1.6831778779 0.014453523 0.0003630507  
C -1.0386720401 1.2389397945 -0.0039550529  
C 0.3413868292 1.2899332589 -0.0064451005  
C 1.0610701144 0.1094427191 -0.0045922025  
C 0.4235400891 -1.120516247 -0.0002917605  
O -3.0453323446 0.0024344415 0.0027634378  
O -1.7657390894 2.3814272862 -0.0056920604  
C 2.5485088607 0.0900843075 -0.0070717356  
O 3.0952817016 1.3093758452 -0.0113293028  
O -1.6919987499 -2.3063132042 0.0065141237  
O 3.2020856654 -0.9158576455 -0.0062427121  
H 1.0217671521 -2.0239924227 0.0010515916  
H 0.8411230112 2.2480596444 -0.0097608474  
H -1.1112405839 -3.0696447249 0.00799023  
H -3.3331879775 -0.9158085795 0.0059623051  
H -2.6983437857 2.1464514465 -0.0032271651  
H 4.0541961607 1.1914570208 -0.0129325377

LC- $\omega$ PBE Gallic Acid (Neutral) -0.006 a.u.

C -0.9499720934 -1.1554923774 0.0021457362  
C -1.6834114052 0.0169167007 0.000307478  
C -1.0398024143 1.2411053366 -0.0040104213  
C 0.3404324529 1.2930934726 -0.006490722  
C 1.0598729883 0.1127263317 -0.0046316773  
C 0.4227287847 -1.117103107 -0.0003344312  
O -3.0491851198 -0.0005934806 0.0027371382  
O -1.7706735014 2.3836005606 -0.005744889  
C 2.5501999922 0.0877853951 -0.0070805232  
O 3.0991470803 1.3036942605 -0.0112012185  
O -1.6918554876 -2.3055096202 0.00649638  
O 3.1921868576 -0.9243161957 -0.006356729  
H 1.0233555141 -2.0192294466 0.0010128464  
H 0.8418357986 2.2505219121 -0.0097852886  
H -1.1064319945 -3.0655411832 0.0080960472  
H -3.3248037368 -0.9224679326 0.0060774789  
H -2.7012915281 2.1426883291 -0.0031408338

H 4.0592288125 1.1893460444 -0.0128023708

LC- $\omega$ PBE Gallic Acid (Neutral) -0.008 a.u.

C -0.9502030215 -1.152300047 0.0020976816  
C -1.6837257896 0.0193784443 0.0002429891  
C -1.040993796 1.2433416396 -0.0040652837  
C 0.339429938 1.296346433 -0.006523065  
C 1.0588095279 0.1161029341 -0.0046521743  
C 0.4219461796 -1.1136458813 -0.0003670728  
O -3.0531086713 -0.0037403781 0.0026930844  
O -1.7758324792 2.3857725505 -0.0057985766  
C 2.5520004594 0.0854943245 -0.0070508975  
O 3.1033031657 1.2979725731 -0.0110910879  
O -1.691756642 -2.3046885616 0.0064689499  
O 3.1823368808 -0.9327408998 -0.0064769143  
H 1.025075491 -2.014381337 0.0009886925  
H 0.8424620623 2.2531139925 -0.0097883798  
H -1.101813846 -3.0615048454 0.0082006464  
H -3.3165022021 -0.9291129958 0.0061858129  
H -2.7044294089 2.1388383024 -0.0030492646  
H 4.064563152 1.1869787522 -0.0127211402

LC- $\omega$ PBE Caffeic Acid (Radical) -0.010 a.u.

C 1.2530318106 0.0554648224 -0.7534545743  
C 0.0023454077 -0.0834722958 -0.0139358231  
C -0.0380778644 -0.1397343416 1.3442545929  
C 1.1611858016 -0.0624998968 2.0753650364  
C 2.3947189779 0.0764228496 1.3712398978  
C 2.4551912306 0.1346867724 0.0228482905  
O -1.0837902818 -0.1508935373 -0.7892411824  
C 1.2264856221 -0.1177412686 3.508352305  
C 0.2043037318 -0.2378977244 4.3661798966  
C 0.5119938108 -0.278233168 5.8257408645  
O -0.5931375078 -0.3820940317 6.5532948663  
O 1.192411203 0.094858341 -1.9961464566  
O 1.6251813464 -0.2231403904 6.2605472855  
H 2.212755338 -0.056350232 3.959499793  
H -0.8351655675 -0.3068926048 4.0720942256  
H -0.3550944656 -0.4013273573 7.4927221191  
H -0.7195320468 -0.081903097 -1.6911030766  
H 3.3949150505 0.2411642253 -0.5033656036  
H 3.3021651048 0.1359510285 1.9603257388  
H -0.990234702 -0.2438490936 1.8465548048

LC- $\omega$ PBE Caffeic Acid (Radical) -0.002 a.u.

C 1.2470898047 0.0554469826 -0.7535321675  
C -0.0001291173 -0.0826653952 -0.0000726881  
C -0.0170832078 -0.1384164227 1.3630044375  
C 1.1891050184 -0.0618181541 2.070782559  
C 2.417274664 0.0737563438 1.3600642034  
C 2.4640028327 0.1315726236 0.0115829957  
O -1.0967809689 -0.1486153857 -0.7423599371  
C 1.2551381523 -0.1141003076 3.5114773511  
C 0.2284320458 -0.2368124757 4.3575696084  
C 0.4928635518 -0.2725627943 5.8110997309  
O -0.6382103702 -0.3968630128 6.516969995  
O 1.1760075751 0.0980337435 -1.9841877124  
O 1.5776626648 -0.2019854758 6.3190663439  
H 2.2428060156 -0.0467311281 3.9578590494  
H -0.8038876517 -0.3128384839 4.0439934424  
H -0.3939532606 -0.4132852295 7.4514797016  
H -0.7805028476 -0.0842266026 -1.6628942069  
H 3.3940903414 0.234766289 -0.5314769928  
H 3.3323521878 0.1308840529 1.9375590504  
H -0.9646254303 -0.2410201672 1.8737882363

LC- $\omega$ PBE Caffeic Acid (Radical) -0.004 a.u.

C 1.2480940768 0.0551306504 -0.753461931  
C 0.0005275262 -0.0827555621 -0.0028463067  
C -0.0213508527 -0.1386244059 1.3593105554  
C 1.1832593814 -0.0620648823 2.0716347734  
C 2.4123739027 0.0741666672 1.362230563  
C 2.461874586 0.132084057 0.0137671073  
O -1.0941625012 -0.1488970636 -0.7522618847  
C 1.2491677319 -0.1149778869 3.5114933852  
C 0.2234226831 -0.237207417 4.3589287183  
C 0.4970469979 -0.2737084233 5.814576284  
O -0.6284439973 -0.3940799801 6.5243726202  
O 1.1789548834 0.0975152852 -1.9869039902  
O 1.5885214013 -0.205529932 6.3056789855  
H 2.2363943754 -0.0487300446 3.9590943711  
H -0.8104147058 -0.3118465542 4.0493135307  
H -0.3870156574 -0.4108912818 7.460339719  
H -0.7667017747 -0.0836488022 -1.6686168803  
H 3.394047587 0.2360970591 -0.5256364868  
H 3.3258092293 0.1318536452 1.9422111583  
H -0.9697528731 -0.2413661282 1.8685487082

LC- $\omega$ PBE Caffeic Acid (Radical) -0.006 a.u.

C 1.2493545551 0.0556075778 -0.7533025517

C 0.00118957 -0.082858302 -0.0060163404  
C -0.0262728112 -0.1389218631 1.3550134642  
C 1.1766432297 -0.0621263939 2.0726860571  
C 2.40697521 0.0747865872 1.36480752  
C 2.4596784004 0.1327591023 0.0164204805  
O -1.0910900073 -0.1492747976 -0.7632933908  
C 1.2424811642 -0.1157430322 3.5109549121  
C 0.2178412818 -0.2376269566 4.3607613138  
C 0.5015784791 -0.2751110912 5.8179997773  
O -0.6177862065 -0.3911354945 6.5327987289  
O 1.1826807357 0.0958526268 -1.9897215569  
O 1.5998532507 -0.2095027146 6.2916845926  
H 2.2293328303 -0.0506626261 3.9596773945  
H -0.8176568221 -0.3108873766 4.0556928625  
H -0.3781510958 -0.4082722162 7.4700393104  
H -0.7520648427 -0.082391083 -1.6751805277  
H 3.3941703381 0.2371832237 -0.5190082863  
H 3.3186269014 0.1328704911 1.9474862966  
H -0.9757321612 -0.2420266614 1.8622729432

LC- $\omega$ PBE Caffeic Acid (Radical) -0.008 a.u.

C 1.251023588 0.0556959434 -0.7533300931  
C 0.0017522482 -0.0833507147 -0.009717998  
C -0.0318614136 -0.139780113 1.3499700809  
C 1.1692987181 -0.062612972 2.0738967593  
C 2.4010731072 0.0756713675 1.3678092523  
C 2.4574382141 0.1340943741 0.0194511791  
O -1.0876098776 -0.1504174299 -0.7756587042  
C 1.2348925681 -0.1172105207 3.509885354  
C 0.2113842523 -0.2376693993 4.3631492804  
C 0.5065464339 -0.2767051749 5.8217054947  
O -0.6060594229 -0.3856704684 6.5425299199  
O 1.1871456832 0.0959613603 -1.9927822824  
O 1.612282562 -0.2172420222 6.2764279224  
H 2.2214565208 -0.0544795937 3.9598277727  
H -0.8260928966 -0.3081554312 4.0633572809  
H -0.3674851677 -0.4040239526 7.4808915098  
H -0.7361693694 -0.0823145632 -1.6826740848  
H 3.3944151739 0.2399117037 -0.51153182  
H 3.3106989012 0.134579715 1.9535545991  
H -0.9824778234 -0.2437631084 1.855011577

LC- $\omega$ PBE Gallic Acid (Radical) -0.010 a.u.

C -0.9442338613 -1.2001955201 0.0031671653  
C -1.7421542227 0.0063772198 0.0014022672  
C -1.0153562316 1.2682212234 -0.00342285

C 0.3513104043 1.3297387002 -0.0064157584  
C 1.0553115233 0.1296659139 -0.0047154299  
C 0.4144112029 -1.1172830438 0.000039584  
O -2.9835080608 0.0383313231 0.0038610098  
O -1.7999938751 2.3447653899 -0.0047116999  
C 2.554194325 0.0848104549 -0.0079257902  
O 3.1089098657 1.2906009577 -0.0117573678  
O -1.6274431461 -2.3581501273 0.0079080533  
O 3.1586743845 -0.9470430182 -0.0071551699  
H 1.0426301659 -2.0015504903 0.0011531326  
H 0.871316985 2.2770998317 -0.0099784539  
H -0.999381397 -3.0866003818 0.0091176708  
H -2.7020386813 1.9761195738 -0.0017752158  
H 4.0724426194 1.1882149931 -0.0134961471

LC- $\omega$ PBE Gallic Acid (Radical) -0.002 a.u.

C -0.9429335763 -1.2102013215 0.0031999927  
C -1.7411557814 0.0019873098 0.0015436934  
C -1.0137046431 1.2652102926 -0.0033919454  
C 0.3549400911 1.3189008887 -0.0064102626  
C 1.0573005399 0.1180507284 -0.0046471251  
C 0.4186135307 -1.1300931771 0.0000957827  
O -2.973443049 0.0301701276 0.0040404226  
O -1.780148853 2.3460989194 -0.0047153112  
C 2.5452883672 0.0933608755 -0.0077572254  
O 3.0948817448 1.3110569753 -0.0121322885  
O -1.6352125518 -2.3542682336 0.0078186101  
O 3.1947156345 -0.9154726621 -0.0065380416  
H 1.0378108749 -2.019453113 0.0012202006  
H 0.8705886021 2.2678970587 -0.0100516567  
H -1.0301757925 -3.1010129719 0.008722124  
H -2.6954385522 2.0101024083 -0.0018701692  
H 4.0531654143 1.1907888946 -0.0138318002

LC- $\omega$ PBE Gallic Acid (Radical) -0.004 a.u.

C -0.9433230983 -1.2076272613 0.0031918008  
C -1.7412717125 0.0031527553 0.0015132992  
C -1.0140144351 1.265852758 -0.0034020497  
C 0.3541510965 1.321420768 -0.0064269217  
C 1.0565959756 0.1207795675 -0.0046823578  
C 0.4175392035 -1.126908195 0.0000705788  
O -2.9757681331 0.0323589321 0.0040041962  
O -1.7847804626 2.345797538 -0.0047107391  
C 2.5473044015 0.0911992062 -0.0078269628  
O 3.0979155913 1.3060325599 -0.0120339081  
O -1.6332122881 -2.3552307606 0.007846485

O 3.1856775194 -0.9233471401 -0.0066625474  
H 1.038797557 -2.0150854172 0.0011908327  
H 0.8709260685 2.2699566663 -0.0100550066  
H -1.0221353659 -3.0972550791 0.0088235547  
H -2.6967994087 2.001596416 -0.001831989  
H 4.0574894911 1.1904296861 -0.0137132651

LC- $\omega$ PBE Gallic Acid (Radical) -0.006 a.u.

C -0.9436681994 -1.2051216959 0.0031832914  
C -1.7414960616 0.0042693498 0.0014767416  
C -1.0143969992 1.2665925665 -0.0034092166  
C 0.3532850795 1.3240750586 -0.0064258231  
C 1.0560354516 0.1236290585 -0.0046959801  
C 0.4164817984 -1.12371537 0.0000579196  
O -2.9782220449 0.0344608991 0.003955158  
O -1.7896703063 2.3454693523 -0.0047098413  
C 2.5494971442 0.0890444592 -0.0078610825  
O 3.1013030861 1.3009237556 -0.0119419688  
O -1.6312610335 -2.3562051865 0.0078669272  
O 3.1766811696 -0.9312563218 -0.006819241  
H 1.0399416258 -2.0106441813 0.0011766588  
H 0.8711695517 2.2721822483 -0.0100326263  
H -1.0143665652 -3.0936334254 0.0089214745  
H -2.6984118552 1.993116845 -0.001809407  
H 4.0621901583 1.189935588 -0.0136379843

LC- $\omega$ PBE Gallic Acid (Radical) -0.008 a.u.

C -0.943970027 -1.2026469543 0.0031756701  
C -1.7417892923 0.0053447866 0.0014399804  
C -1.0148415156 1.2673840026 -0.0034165591  
C 0.3523401224 1.3268470366 -0.0064224649  
C 1.0556081119 0.1265892584 -0.0047072548  
C 0.4154384337 -1.1205095502 0.0000476993  
O -2.9807977245 0.0364522626 0.0039066627  
O -1.7947390756 2.345125744 -0.0047109953  
C 2.5517899832 0.0869149457 -0.0078956569  
O 3.1049621083 1.2957831929 -0.0118450852  
O -1.629338838 -2.3571777169 0.0078887027  
O 3.1676826717 -0.9391539181 -0.0069907113  
H 1.0412175924 -2.0061355126 0.0011634659  
H 0.8713047157 2.2745608983 -0.0100076648  
H -1.0067861877 -3.0900824991 0.0090223873  
H -2.7001562043 1.9846244581 -0.0017910669  
H 4.0671671257 1.1892025653 -0.0135621091

LC- $\omega$ PBE Caffeic Acid (Neutral) Zero field

C 1.2615133847 0.0530635245 -0.7038618643  
C 0.0487920606 -0.0775964654 -0.0263303251  
C 0.0404791954 -0.1319474343 1.3449300148  
C 1.2294021342 -0.0581224799 2.0677249324  
C 2.423895667 0.07163482 1.3787618452  
C 2.4422621074 0.1272152648 -0.0037461236  
O -1.1104030347 -0.1501117773 -0.7162307532  
C 1.2660510317 -0.1124640959 3.5280809119  
C 0.2388689043 -0.2369284661 4.3583540053  
C 0.4816064005 -0.2726611486 5.8094698123  
O -0.6624053715 -0.4017741385 6.5047154888  
O 1.1678758741 0.0981580081 -2.0612356625  
O 1.551012029 -0.1975159883 6.3536127965  
H 2.2504627418 -0.0428441391 3.9824662867  
H -0.7895619848 -0.3160829378 4.0331044466  
H -0.4164732394 -0.416248311 7.4378436059  
H 2.0358736658 0.1882691633 -2.4579681871  
H -0.9139567079 -0.096168432 -1.6570358634  
H 3.3811210294 0.2288584247 -0.5370274078  
H 3.3548743417 0.1302277816 1.9288801903  
H -0.9161792293 -0.2332891727 1.8400758503

LC- $\omega$ PBE Caffeic Acid (Neutral) 0.010 a.u.

C 1.2702322774 0.0519080635 -0.703760552  
C 0.0508533826 -0.0711035003 -0.0123838032  
C 0.052218193 -0.1199845675 1.3553678032  
C 1.2506669063 -0.0477965905 2.0748555478  
C 2.4438556902 0.075408366 1.3756207747  
C 2.4577449746 0.1246756979 -0.0064818006  
O -1.104903295 -0.140248808 -0.6860394186  
C 1.2898756685 -0.1000309307 3.5190586476  
C 0.2560477059 -0.2338958955 4.3612253388  
C 0.4637757078 -0.2717013336 5.7935960945  
O -0.7041337094 -0.4253208282 6.4792249233  
O 1.1461522583 0.0887244266 -2.0352514523  
O 1.5012302083 -0.1867119614 6.4144369987  
H 2.2766476388 -0.0233848546 3.9687833108  
H -0.7653177315 -0.3239104797 4.0194016015  
H -0.4336796594 -0.4418963607 7.4027884612  
H 1.9839860021 0.1632874908 -2.5015279367  
H -0.9373450237 -0.099774082 -1.6363180441  
H 3.3918905018 0.2193553643 -0.5472206669  
H 3.3800984681 0.1321604662 1.9183652068  
H -0.9047851648 -0.2160876826 1.8508429654

LC- $\omega$ PBE Caffeic Acid (Neutral) 0.002 a.u.

C 1.26306797 0.0512727915 -0.7034986614  
C 0.0494350607 -0.0729569847 -0.022284382  
C 0.0438018782 -0.1234212727 1.3484449487  
C 1.235140176 -0.0520169233 2.0691206754  
C 2.4289772066 0.0722550942 1.3778061144  
C 2.4455671071 0.1235546024 -0.0051467347  
O -1.1100773393 -0.142646977 -0.7075448693  
C 1.2719151158 -0.1044385656 3.5274061388  
C 0.2437051505 -0.2394606704 4.3576861032  
C 0.4770656094 -0.2723424672 5.8059381002  
O -0.6716450836 -0.4175008379 6.4967320957  
O 1.1619956463 0.0924039042 -2.056019002  
O 1.5385977415 -0.1853336221 6.3668392552  
H 2.2556246106 -0.0249207673 3.9819086835  
H -0.7819476345 -0.3307069895 4.0274618405  
H -0.4226731425 -0.4298359425 7.4284357242  
H 2.0244174783 0.1735391016 -2.4676208644  
H -0.9197977972 -0.0942682939 -1.6504883825  
H 3.3833995205 0.2203931535 -0.5405969098  
H 3.3615491683 0.1292887764 1.9256497163  
H -0.9130074425 -0.2191851097 1.8443544099

LC- $\omega$ PBE Caffeic Acid (Neutral) 0.004 a.u.

C 1.2646417126 0.0513267487 -0.7032620225  
C 0.0501754449 -0.0718935934 -0.0189168314  
C 0.0470483289 -0.1215642292 1.3511324777  
C 1.2404484602 -0.0502503812 2.0703725685  
C 2.4335300097 0.0731250987 1.3770384475  
C 2.4485249736 0.1234920165 -0.0060924625  
O -1.1089855613 -0.1411891555 -0.7003041792  
C 1.2775382869 -0.1025366126 3.5260936822  
C 0.247678413 -0.238439128 4.3576129075  
C 0.4730536341 -0.2722694525 5.8027044102  
O -0.6808739726 -0.4213773657 6.4903947304  
O 1.156530739 0.0910554004 -2.0507088791  
O 1.5278982992 -0.1840516088 6.379399333  
H 2.261644181 -0.0226216874 3.9799258678  
H -0.7764750545 -0.3306006196 4.0235587883  
H -0.4283042927 -0.4343423857 7.4205501779  
H 2.0128643134 0.1688166151 -2.4766679665  
H -0.924784498 -0.0954591893 -1.6452161881  
H 3.3851731083 0.219317858 -0.543334387  
H 3.367406142 0.1299189054 1.9229354527  
H -0.9096216677 -0.2167852337 1.8473680725

LC- $\omega$ PBE Caffeic Acid (Neutral) 0.006 a.u.



C 1.2663531904 0.0514215736 -0.7032220145  
C 0.0507028467 -0.0713182331 -0.016136252  
C 0.0495935559 -0.1204770646 1.3532157391  
C 1.244846513 -0.0490160375 2.071726522  
C 2.4375402602 0.073942401 1.3764395669  
C 2.451512536 0.1236665014 -0.0066366517  
O -1.1077324109 -0.1404462411 -0.6942616357  
C 1.2824229883 -0.1012597849 3.5243110549  
C 0.2510795409 -0.2371375788 4.3581326952  
C 0.4695110494 -0.2721436116 5.7995818173  
O -0.6893659101 -0.4237440913 6.4852858478  
O 1.1520258534 0.0899616575 -2.0454886103  
O 1.5180988756 -0.1840672575 6.3914780226  
H 2.2671836051 -0.0218148884 3.9771293627  
H -0.7718699133 -0.3292516627 4.0208657426  
H -0.4321300643 -0.4376502871 7.4136158766  
H 2.0021743754 0.1659477327 -2.4853203854  
H -0.9293620559 -0.096795398 -1.6410454683  
H 3.3871364715 0.2188274004 -0.5453765657  
H 3.3724655784 0.130643638 1.920828731  
H -0.9070758859 -0.2156167679 1.8494606049

LC- $\omega$ PBE Caffeic Acid (Neutral) 0.008 a.u.

C 1.2682249069 0.0516871541 -0.7033781924  
C 0.0509490766 -0.0711625908 -0.0139459116  
C 0.0513269941 -0.1201639949 1.3546256804  
C 1.2482714794 -0.0483357589 2.0732029079  
C 2.4409546571 0.0747121809 1.3759904204  
C 2.4545555555 0.1241873038 -0.006782549  
O -1.1063335682 -0.1403187889 -0.6895267721  
C 1.286530865 -0.100620884 3.5219788949  
C 0.2538467064 -0.2354865872 4.3593206514  
C 0.4664421984 -0.2719437332 5.7965478602  
O -0.6971217457 -0.424701808 6.4815599319  
O 1.1485220318 0.0893626626 -2.0403456488  
O 1.509252514 -0.1853007327 6.4031064545  
H 2.2722051481 -0.0225796658 3.9734329356  
H -0.7682140685 -0.3265041105 4.0194957818  
H -0.4339474029 -0.4399135017 7.407706732  
H 1.9924846439 0.1643392072 -2.4936203949  
H -0.9334481997 -0.0983529608 -1.6380845108  
H 3.3893542351 0.219098199 -0.5466446065  
H 3.3766786496 0.1314430801 1.9193067298  
H -0.9054236772 -0.2157726703 1.8506376054

LC- $\omega$ PBE Gallic Acid (Neutral) Zero field

C -0.9490283337 -1.1651845768 0.0022689415  
C -1.6829425897 0.0095221875 0.0004672378  
C -1.0365600207 1.2348279336 -0.0038636248  
C 0.343152761 1.2838807707 -0.0063887162  
C 1.0639168938 0.1031355632 -0.0045509919  
C 0.425246547 -1.1272378297 -0.0002290109  
O -3.03777238 0.0080933951 0.0028344451  
O -1.7564901937 2.3771116806 -0.0055985897  
C 2.5453287252 0.0947466959 -0.0071118814  
O 3.0883527208 1.3207579692 -0.0115478581  
O -1.6924528675 -2.3078573647 0.0065596087  
O 3.2220727278 -0.8987512739 -0.0059976349  
H 1.0189566608 -2.0333045318 0.0011034713  
H 0.8394687559 2.2434957571 -0.009756939  
H -1.1215101268 -3.0780632354 0.0077876962  
H -3.3501228624 -0.9024975658 0.0057843895  
H -2.6929723515 2.1537619109 -0.0033625383  
H 4.0449169337 1.1947875145 -0.0131040049

LC- $\omega$ PBE Gallic Acid (Neutral) 0.010 a.u.

C -0.9461297199 -1.1819688851 0.0024380361  
C -1.6833934928 -0.0026518063 0.0006508464  
C -1.0319029942 1.2262665501 -0.0036822179  
C 0.3465841046 1.2705361105 -0.0062163536  
C 1.074073974 0.0890060008 -0.0043618638  
C 0.4299113377 -1.1435191981 -0.0000184329  
O -3.0194139131 0.0193464308 0.0029035673  
O -1.7370076767 2.3670882337 -0.0054334935  
C 2.5383686722 0.1065698033 -0.0070115676  
O 3.0753526079 1.3492095249 -0.0120416093  
O -1.6948389659 -2.3112343612 0.0066555812  
O 3.2730471538 -0.8556399934 -0.0056158004  
H 1.0139616264 -2.0554227808 0.001323801  
H 0.8341250888 2.2342774407 -0.0096836415  
H -1.1516771324 -3.1003869121 0.007280617  
H -3.3925291738 -0.8702693965 0.0054250423  
H -2.6827476691 2.1714889435 -0.0036347732  
H 4.0257771728 1.1985292949 -0.0136837376

LC- $\omega$ PBE Gallic Acid (Neutral) 0.002 a.u.

C -0.9485943726 -1.1684495384 0.0023037071  
C -1.6829193038 0.0070646458 0.0005135843  
C -1.0355751254 1.2328928544 -0.0038267999  
C 0.34394806 1.2810114247 -0.006371145  
C 1.0655704702 0.1001352137 -0.0045402453  
C 0.426137069 -1.130538216 -0.0002041881

O -3.0340621189 0.0106988833 0.0028709471  
O -1.7521999264 2.374995562 -0.0055595873  
C 2.5438136031 0.0971067969 -0.0071437095  
O 3.0853088883 1.3264339303 -0.0116366543  
O -1.6927862367 -2.3085854312 0.006584171  
O 3.232142117 -0.8901294467 -0.0058848674  
H 1.0177495802 -2.0378289769 0.0011224161  
H 0.838524897 2.2414064056 -0.0097668306  
H -1.1269871368 -3.0823591787 0.0076954547  
H -3.3586119765 -0.8959053492 0.0057181945  
H -2.6905763403 2.1573070188 -0.0034169662  
H 4.0406788526 1.1959684015 -0.013163481

LC- $\omega$ PBE Gallic Acid (Neutral) 0.004 a.u.

C -0.9480929224 -1.171735309 0.0023347883  
C -1.6829493109 0.0046250452 0.0005532768  
C -1.0346317648 1.2310548662 -0.0037933578  
C 0.3446842788 1.2782535985 -0.0063513936  
C 1.0673810027 0.0972384184 -0.0045243575  
C 0.4270475487 -1.1338090994 -0.0001771517  
O -3.0303984819 0.0131360543 0.0028975023  
O -1.748127998 2.3729338481 -0.0055248077  
C 2.542362309 0.099470211 -0.0071624037  
O 3.0825170574 1.3320792498 -0.0117197316  
O -1.6931959925 -2.3092899593 0.0066044501  
O 3.242240314 -0.8815102559 -0.0057893657  
H 1.0166839074 -2.0422665398 0.0011450731  
H 0.8375231261 2.2394424289 -0.009771387  
H -1.1327049084 -3.0867169356 0.0076115528  
H -3.3670846389 -0.8893914931 0.0056591567  
H -2.6883718053 2.1608174191 -0.0034660316  
H 4.0366792789 1.1968934528 -0.0132318122

LC- $\omega$ PBE Gallic Acid (Neutral) 0.006 a.u.

C -0.9475267334 -1.175070183 0.0023665549  
C -1.6830389258 0.0021921436 0.0005892066  
C -1.0337213145 1.2293248913 -0.0037599742  
C 0.3453649617 1.2755931899 -0.0063228007  
C 1.0693738915 0.0944271709 -0.0044945802  
C 0.4279802653 -1.1370558211 -0.0001409923  
O -3.0267550344 0.0154053798 0.0029135397  
O -1.7442539598 2.370914356 -0.0054938967  
C 2.5409953079 0.1018295981 -0.0071559964  
O 3.0799565791 1.3377052369 -0.0118044721  
O -1.693670066 -2.3099659101 0.00662331  
O 3.2524024104 -0.8729032458 -0.0057141944

H 1.0157181223 -2.0466552191 0.0011806561  
H 0.8364462494 2.2376040519 -0.0097637564  
H -1.1386928726 -3.0911559029 0.0075200336  
H -3.375576827 -0.8829302647 0.0055986167  
H -2.6863446697 2.1643202169 -0.0035181331  
H 4.0329036157 1.1976453113 -0.0133291209

LC- $\omega$ PBE Gallic Acid (Neutral) 0.008 a.u.

C -0.946880614 -1.1784826441 0.0024031263  
C -1.6831972021 -0.000243967 0.0006240846  
C -1.0328172094 1.2277270213 -0.0037226026  
C 0.345996447 1.2730189407 -0.006280318  
C 1.0716118283 0.0916845046 -0.0044432373  
C 0.4289403223 -1.1402747106 -0.0000877285  
O -3.0231075817 0.0174802456 0.0029203063  
O -1.7405669491 2.3689520852 -0.0054628494  
C 2.5396848167 0.1041936222 -0.007109849  
O 3.0776129466 1.3433973683 -0.0119163815  
O -1.6942072865 -2.3106157404 0.006645009  
O 3.2627027767 -0.8642653483 -0.0056455191  
H 1.0147870969 -2.0510445318 0.0012422949  
H 0.8352867639 2.2358941861 -0.0097390374  
H -1.1450041958 -3.0957191346 0.0073970535  
H -3.3841075989 -0.87653841 0.0055201087  
H -2.6844968866 2.1678767652 -0.0035733054  
H 4.0293235256 1.1981847474 -0.0134771549

LC- $\omega$ PBE Caffeic Acid (Radical) Zero field

C 1.2463798212 0.0558352502 -0.7537586403  
C -0.0009143814 -0.0825506588 0.0022850998  
C -0.013469029 -0.1381973806 1.3661489962  
C 1.1942287424 -0.0616094548 2.0701579299  
C 2.4217767418 0.0733869866 1.3581445778  
C 2.466193859 0.1311364767 0.0096655156  
O -1.0992085255 -0.148301508 -0.7333506242  
C 1.2604630355 -0.1133745833 3.5110149577  
C 0.232932256 -0.2367760975 4.3567338332  
C 0.4890943575 -0.2721145041 5.8077657639  
O -0.6472733109 -0.3993160279 6.5105519756  
O 1.1739588426 0.0987365329 -1.981761171  
O 1.5673900336 -0.1984773145 6.3317955978  
H 2.2486236001 -0.0449357721 3.9561542583  
H -0.797984248 -0.3142009201 4.0395551968  
H -0.3993806058 -0.4147848077 7.44342007  
H -0.793523229 -0.0847647086 -1.6577496201  
H 3.3944109163 0.2335585043 -0.5366781231

H 3.3382937827 0.1299472363 1.9335068479  
H -0.960340659 -0.2406782489 1.8781705584

LC- $\omega$ PBE Caffeic Acid (Radical) 0.010 a.u.

C 1.2484563726 0.0558395411 -0.7575268934  
C -0.0065296208 -0.0823316335 0.0078914437  
C -0.0063383833 -0.1362329818 1.374255821  
C 1.207030008 -0.0600884437 2.0701548229  
C 2.4381610405 0.0723135963 1.3515171525  
C 2.4793541212 0.1287789725 0.0055298222  
O -1.1052715685 -0.1471670723 -0.7046313523  
C 1.2764645553 -0.1087489399 3.5013761617  
C 0.2467801018 -0.2346708805 4.360621443  
C 0.4752584521 -0.2684949779 5.7928728727  
O -0.681122381 -0.4097626021 6.4949330835  
O 1.1736649075 0.1028896015 -1.9719740257  
O 1.5262155241 -0.1881560107 6.3880068386  
H 2.2688790509 -0.0364995373 3.9372583419  
H -0.7797551859 -0.3181361108 4.0332468912  
H -0.4009954511 -0.4241079895 7.4158485889  
H -0.8455638737 -0.0897475399 -1.6457011719  
H 3.4013740217 0.2277918148 -0.5523500353  
H 3.3581190319 0.1265356595 1.9224098827  
H -0.9525287234 -0.2374854657 1.8880333121

LC- $\omega$ PBE Caffeic Acid (Radical) 0.002 a.u.

C 1.2460213964 0.0561218216 -0.7540681681  
C -0.0017678243 -0.0824688629 0.0042278081  
C -0.01055035 -0.1378659575 1.3687474469  
C 1.1985498347 -0.0612686437 2.0697293314  
C 2.425855066 0.0730897715 1.3565250815  
C 2.4684645035 0.1306308062 0.0081389602  
O -1.1012258997 -0.1480538204 -0.7254761363  
C 1.2650410137 -0.1124248591 3.5100804292  
C 0.2368063041 -0.2363914293 4.3563770763  
C 0.4856565946 -0.2712598522 5.8045704687  
O -0.6554323515 -0.4018306002 6.5051878533  
O 1.1725776958 0.0992232063 -1.9794671803  
O 1.5578080832 -0.1956060643 6.3439125172  
H 2.2537933702 -0.0430084999 3.9538300184  
H -0.7928805126 -0.3151389319 4.036144048  
H -0.4030543064 -0.41691705 7.4362153583  
H -0.8056862801 -0.0854686489 -1.6535417287  
H 3.3950244085 0.2322111281 -0.5411631822  
H 3.3435919387 0.1291096432 1.9301122586  
H -0.9569406845 -0.2401641567 1.8816907394

LC- $\omega$ PBE Caffeic Acid (Radical) 0.004 a.u.

C 1.2460120994 0.0564140056 -0.7545718848  
C -0.0027536219 -0.0824070041 0.0057661045  
C -0.0083209566 -0.1375087202 1.3708466834  
C 1.202068352 -0.0609056517 2.0694982188  
C 2.4295545731 0.0728464101 1.3551272326  
C 2.4708794202 0.1301411055 0.0069756847  
O -1.1028705156 -0.1478265076 -0.7186503367  
C 1.2689233143 -0.1114581468 3.508679693  
C 0.2401286287 -0.2359951156 4.3565277941  
C 0.4825775512 -0.2705020805 5.8015071108  
O -0.6628349139 -0.4041819234 6.5008648381  
O 1.1718756904 0.0997093483 -1.9773444008  
O 1.5488873336 -0.1930736328 6.3555239641  
H 2.2583931202 -0.0411422456 3.9508348299  
H -0.7885052206 -0.3160318684 4.0337572656  
H -0.4051459789 -0.4189356075 7.4298465785  
H -0.8170607526 -0.086211866 -1.6501939686  
H 3.3959740366 0.2308784556 -0.5449976094  
H 3.348273003 0.1283309074 1.9273433939  
H -0.9544031626 -0.2396208625 1.8844318084

LC- $\omega$ PBE Caffeic Acid (Radical) 0.006 a.u.

C 1.2463597812 0.0565785044 -0.7552469043  
C -0.0038749709 -0.0823674606 0.0069231215  
C -0.0067987165 -0.1371187888 1.3724972325  
C 1.2047706065 -0.0605486534 2.0694734119  
C 2.4328881299 0.0726248009 1.3538863116  
C 2.4734684497 0.1296356394 0.0061425711  
O -1.1041648497 -0.1476137822 -0.712774334  
C 1.2721533094 -0.1104607535 3.5067856048  
C 0.2429221862 -0.2355185713 4.3571932784  
C 0.479788049 -0.2697465137 5.7985085181  
O -0.6695923754 -0.4064394511 6.4975739063  
O 1.1718495852 0.1003548892 -1.9753854053  
O 1.540575114 -0.1908249041 6.3666899558  
H 2.2624635578 -0.0393404658 3.9471347762  
H -0.7848227736 -0.3167996038 4.0323373396  
H -0.4056091479 -0.4209672846 7.4242365698  
H -0.8276429055 -0.0870831179 -1.6476250419  
H 3.3973036089 0.2295734774 -0.5481777447  
H 3.3523488215 0.1275947428 1.9251341448  
H -0.9527334599 -0.2390137033 1.8864656881

LC- $\omega$ PBE Caffeic Acid (Radical) 0.008 a.u.

C 1.2472406408 0.0558028389 -0.7562069543  
C -0.0051034908 -0.082287117 0.0076415714  
C -0.0062205899 -0.1365200836 1.3735750395  
C 1.206354102 -0.0602963138 2.0697293856  
C 2.4356837573 0.0724178286 1.3527206214  
C 2.4762575816 0.1291033467 0.005698533  
O -1.1049606222 -0.1473034775 -0.7082070286  
C 1.2746216602 -0.109574102 3.5043320342  
C 0.2450896451 -0.2351031017 4.3585617535  
C 0.4774210863 -0.2690982126 5.7956259944  
O -0.6755576748 -0.4082736274 6.495623078  
O 1.172431019 0.1018550311 -1.9735375707  
O 1.5331042601 -0.1893264429 6.3774157127  
H 2.2658893618 -0.0378268241 3.9426322759  
H -0.7819506232 -0.317523222 4.0322181602  
H -0.4040947361 -0.4226733793 7.4196026205  
H -0.83693374 -0.0886934061 -1.6462148646  
H 3.3990704094 0.2286852602 -0.5505522026  
H 3.3555323589 0.1270952538 1.9235440654  
H -0.9522224056 -0.2379412494 1.887570775

LC- $\omega$ PBE Gallic Acid (Radical) Zero field

C -0.9424736066 -1.212819776 0.003210104  
C -1.741091795 0.0007878603 0.0015823199  
C -1.0134270024 1.2646141251 -0.0033854855  
C 0.3556655829 1.3164803317 -0.0064074847  
C 1.0581509761 0.1154092366 -0.0046276241  
C 0.4197052158 -1.1332924138 0.0001139064  
O -2.9712016553 0.0278374414 0.0040910888  
O -1.7756197723 2.3464003942 -0.0047203876  
C 2.5432857153 0.0955746544 -0.0077174972  
O 3.0920317247 1.3161420016 -0.012223585  
O -1.6372420763 -2.3532826449 0.0077976147  
O 3.2037574936 -0.9075289918 -0.006395278  
H 1.0369318887 -2.0237960628 0.0012382027  
H 0.8701653189 2.2659658718 -0.010069517  
H -1.0384405209 -3.104835591 0.0086213994  
H -2.6941094753 2.018591053 -0.001897853  
H 4.049003988 1.1908755101 -0.0139149238

LC- $\omega$ PBE Gallic Acid (Radical) 0.010 a.u.

C -0.9388312782 -1.2272704683 0.0032855674  
C -1.7419667764 -0.0057933005 0.00182361  
C -1.0124170761 1.2630906292 -0.0033813991  
C 0.3584462567 1.3062496098 -0.006448161  
C 1.0649750852 0.1037085878 -0.0045873053

C 0.4254388678 -1.1497407317 0.0001974783  
O -2.9611247376 0.0142953265 0.0044499318  
O -1.7553312096 2.347853162 -0.0047822614  
C 2.5339391701 0.1072819142 -0.0076630797  
O 3.0812110689 1.3423339123 -0.0125296845  
O -1.6480708677 -2.3481463727 0.0077517764  
O 3.2494895403 -0.8674795665 -0.005818217  
H 1.0345495696 -2.0451515463 0.0012921178  
H 0.867162381 2.2584946748 -0.0102565631  
H -1.0845075591 -3.1257567689 0.0081441372  
H -2.6891524027 2.0609067111 -0.0020467131  
H 4.0312819678 1.1882472271 -0.0141362345

LC- $\omega$ PBE Gallic Acid (Radical) 0.002 a.u.

C -0.9419355418 -1.215516016 0.0032216465  
C -1.7411104821 -0.0004519093 0.0016228887  
C -1.0131875348 1.2641051922 -0.0033798221  
C 0.3563278705 1.3141768477 -0.0064043396  
C 1.0591587966 0.1128684784 -0.0046072981  
C 0.4208166278 -1.136508736 0.0001340351  
O -2.9690423059 0.0253804247 0.0041434637  
O -1.7712608977 2.3466894717 -0.0047279467  
C 2.5413519567 0.0978271128 -0.0076793825  
O 3.0894331546 1.3212453246 -0.0123092633  
O -1.6393137166 -2.3522822595 0.0077784519  
O 3.2128320814 -0.8995548285 -0.0062644661  
H 1.0361868514 -2.0281037045 0.001257013  
H 0.8696663459 2.264177793 -0.0100883663  
H -1.0470025807 -3.1087753887 0.0085215172  
H -2.6929116154 2.0270863504 -0.0019281889  
H 4.0450829901 1.190758847 -0.0139949425

LC- $\omega$ PBE Gallic Acid (Radical) 0.004 a.u.

C -0.9413047052 -1.2183033861 0.0032352438  
C -1.7412104764 -0.0017332138 0.001667912  
C -1.0129779094 1.263689709 -0.0033753369  
C 0.356928957 1.3119947479 -0.0064018606  
C 1.060336346 0.1104296784 -0.0045860405  
C 0.4219490949 -1.1397522495 0.0001567284  
O -2.966953656 0.022785725 0.0041973915  
O -1.7670625179 2.3469744254 -0.0047386451  
C 2.5394606339 0.1001291333 -0.0076431865  
O 3.0870787731 1.3263978337 -0.0123891429  
O -1.6414297504 -2.3512671265 0.0077604523  
O 3.2219470584 -0.8915374332 -0.0061437672  
H 1.0355770469 -2.0323852511 0.0012768377



H 0.8690970341 2.2625343955 -0.010109948  
H -1.0558904947 -3.1128463256 0.0084203184  
H -2.6918365706 2.0355961372 -0.0019597922  
H 4.0413831362 1.1904162005 -0.0140721641

LC- $\omega$ PBE Gallic Acid (Radical) 0.006 a.u.

C -0.9406039025 -1.2211673662 0.0032488567  
C -1.7413652948 -0.0030457325 0.0017084512  
C -1.012782629 1.2633643892 -0.0033746363  
C 0.3574908569 1.3099339019 -0.0064087165  
C 1.0616811267 0.1080734188 -0.0045782463  
C 0.4230943922 -1.1430370596 0.000172764  
O -2.9649553434 0.0200718169 0.0042759756  
O -1.7629639531 2.347272684 -0.0047512722  
C 2.5375938835 0.1024649102 -0.0076327285  
O 3.0848668007 1.3316291477 -0.0124498251  
O -1.6435847541 -2.3502435482 0.0077531219  
O 3.2310706981 -0.8835277252 -0.0060283476  
H 1.0350853104 -2.0366609313 0.0012883056  
H 0.8684971921 2.2610282572 -0.0101440386  
H -1.0650384786 -3.1169941698 0.0083274223  
H -2.6907894187 2.0440553633 -0.0019966454  
H 4.0377955137 1.1899056436 -0.0141154407

LC- $\omega$ PBE Gallic Acid (Radical) 0.008 a.u.

C -0.9397746312 -1.2241592611 0.0032664142  
C -1.7416252071 -0.0044009708 0.0017661197  
C -1.0126009999 1.2631649281 -0.0033760162  
C 0.357990848 1.3080214469 -0.0064236154  
C 1.0632285318 0.1058393135 -0.0045762936  
C 0.424260824 -1.1463623807 0.0001878156  
O -2.9630139486 0.0172443796 0.0043515721  
O -1.7590768766 2.3475648212 -0.0047654382  
C 2.535760461 0.1048500532 -0.0076368239  
O 3.0829424139 1.3369292835 -0.0125022302  
O -1.6458013868 -2.3492095815 0.0077468379  
O 3.2402606328 -0.8754988844 -0.0059161627  
H 1.0347498791 -2.0409103344 0.001294114  
H 0.8678419359 2.2596864997 -0.0101938932  
H -1.0745858187 -3.1213167411 0.0082341064  
H -2.6899296054 2.0525134966 -0.002020879  
H 4.0344649477 1.1891669318 -0.0141406273

M06-2X Caffeic Acid (Neutral) -0.010 a.u.

C 1.257400439 0.0638635894 -0.7129281874  
C 0.0458233289 -0.1332757986 -0.0552425632

C 0.0199032028 -0.2258712052 1.3222234195  
C 1.1994025575 -0.1219042836 2.0658805817  
C 2.4026355673 0.0665554014 1.3865077574  
C 2.4323719994 0.1616216646 0.0035302142  
O -1.1084088825 -0.2360331055 -0.7763781036  
C 1.2380387289 -0.1986287482 3.5293156851  
C 0.2115461787 -0.1968530351 4.3724425596  
C 0.5051894175 -0.2680232398 5.8364938527  
O -0.6145743784 -0.2395350142 6.557980498  
O 1.1999401146 0.147083847 -2.0953509212  
O 1.6097486891 -0.3393663585 6.2890650739  
H 2.2262029295 -0.2449652683 3.977995852  
H -0.8268484998 -0.1353774121 4.0737042256  
H -0.3838869576 -0.281891421 7.4985285918  
H 2.0741138318 0.3803020308 -2.4107672318  
H -0.8841174813 -0.1164457329 -1.7026555655  
H 3.3725927194 0.3121003957 -0.5168665544  
H 3.3214066153 0.1443833842 1.95196836  
H -0.93336912 -0.38406769 1.8091364556

M06-2X Caffeic Acid (Neutral) -0.002 a.u.

C 1.2625186571 0.0480759222 -0.7108064733  
C 0.0452216821 -0.0712068204 -0.0318972064  
C 0.0336833144 -0.1199387139 1.3451518619  
C 1.2274964148 -0.051198838 2.0711575929  
C 2.4292666573 0.069449393 1.378805772  
C 2.4484195932 0.117887214 -0.0084336232  
O -1.1169592274 -0.1370570596 -0.7248775818  
C 1.2650062274 -0.100366701 3.5320766892  
C 0.2350447141 -0.2491377887 4.3632260407  
C 0.484727414 -0.2716748148 5.8204381612  
O -0.6565479063 -0.4268687655 6.5143472185  
O 1.1711508653 0.0899076053 -2.074481218  
O 1.5568574005 -0.1668078594 6.3494218094  
H 2.2464476048 -0.005028142 3.9877206898  
H -0.7903771794 -0.3574623137 4.0387972352  
H -0.4242393236 -0.4324720643 7.4520312926  
H 2.045436074 0.1724140468 -2.4606385228  
H -0.9190012795 -0.0809988247 -1.665127863  
H 3.3862259115 0.2116980831 -0.5435998628  
H 3.3581205019 0.1250329856 1.9305504446  
H -0.9233871161 -0.2105745438 1.8407215432

M06-2X Caffeic Acid (Neutral) -0.004 a.u.

C 1.2611020411 0.0526877142 -0.7115050666  
C 0.0447316619 -0.0805118485 -0.0370920794

C 0.0297351128 -0.1377225326 1.34023558  
C 1.2206239533 -0.0635625709 2.0698310767  
C 2.4230463183 0.0688747082 1.3802480982  
C 2.4447364968 0.1266121487 -0.0063268609  
O -1.1164008135 -0.1520492387 -0.7361074713  
C 1.2584656295 -0.1169373018 3.5320194972  
C 0.228778075 -0.2425846013 4.3652703025  
C 0.4900647764 -0.2716234703 5.8246400128  
O -0.6474567954 -0.3943271442 6.5250874783  
O 1.1779005843 0.1028135867 -2.0800083755  
O 1.5721843903 -0.1954665435 6.3348531415  
H 2.2422461915 -0.0424903049 3.9864060928  
H -0.8012986133 -0.3247244587 4.0469754531  
H -0.4154336084 -0.4055746996 7.463573632  
H 2.0572242205 0.198995805 -2.450377137  
H -0.9114714311 -0.0867939252 -1.6737059763  
H 3.3835696676 0.2308860792 -0.5383449127  
H 3.3498965179 0.1277309334 1.9348854435  
H -0.9271333756 -0.2405603354 1.8340260712

M06-2X Caffeic Acid (Neutral) -0.006 a.u.

C 1.2596657651 0.0584552096 -0.711812412  
C 0.0458053595 -0.1062401621 -0.0432724724  
C 0.0277692307 -0.1804518627 1.3339397641  
C 1.2145884706 -0.0918699158 2.0680214164  
C 2.4164685116 0.0674193197 1.3821845355  
C 2.4402076717 0.1435390035 -0.0030593887  
O -1.1128923282 -0.1928298958 -0.7494755773  
C 1.2529009483 -0.1551753957 3.5308641589  
C 0.2219095695 -0.2228940388 4.3675741501  
C 0.494984287 -0.2706982029 5.828384346  
O -0.6393991869 -0.316066949 6.5370967125  
O 1.1845610445 0.1237567799 -2.0848956169  
O 1.5878765528 -0.2675797826 6.3180612987  
H 2.240379534 -0.1353627374 3.9828669774  
H -0.813996184 -0.2389318438 4.056645813  
H -0.4069557574 -0.3423642771 7.4760011679  
H 2.0611241254 0.2892608516 -2.4359346084  
H -0.9021979369 -0.102760115 -1.6831849368  
H 3.3789709712 0.2697419965 -0.5310166893  
H 3.3405508582 0.135058961 1.9403267821  
H -0.9272105068 -0.3103349432 1.8252685794

M06-2X Caffeic Acid (Neutral) -0.008 a.u.

C 1.2586042296 0.060734228 -0.7124788989  
C 0.0455331782 -0.1173170698 -0.0491259276

C 0.0234467061 -0.1992216169 1.3283158633  
C 1.2068220814 -0.1043377494 2.0669563701  
C 2.4096367634 0.0669662773 1.3841759227  
C 2.4365367482 0.1509568632 -0.0000892583  
O -1.1112653233 -0.2104504699 -0.7624560951  
C 1.2453228759 -0.172999216 3.5303001288  
C 0.2162179053 -0.2128187376 4.3700151524  
C 0.5002194048 -0.269778738 5.8325066056  
O -0.6272852815 -0.2840601609 6.5477581252  
O 1.1923800032 0.1335008341 -2.0903472131  
O 1.5999095266 -0.2971394072 6.3035047882  
H 2.2336716812 -0.179905473 3.9808121695  
H -0.8218952618 -0.1976485558 4.0653427403  
H -0.3953163303 -0.3165767369 7.487465385  
H 2.0696433344 0.3267435183 -2.4242706037  
H -0.893516772 -0.1080799539 -1.6927822733  
H 3.3762966382 0.2871746183 -0.5244707132  
H 3.3312163139 0.1387291575 1.9458688554  
H -0.9310674216 -0.3407996116 1.8175828767

M06-2X Gallic Acid (Neutral) -0.010 a.u.

C -0.9517023247 -1.1564829278 0.0018599551  
C -1.6867566338 0.0196989078 0.0000415169  
C -1.0428535839 1.2477795067 -0.0041879001  
C 0.3428435112 1.3023098613 -0.0066484271  
C 1.0641082242 0.1165619402 -0.0048113501  
C 0.4249598143 -1.118305724 -0.0005746593  
O -3.0622255892 -0.0051301587 0.0025780588  
O -1.7821119877 2.3920627573 -0.0058339076  
C 2.5627153399 0.0821398921 -0.0072162412  
O 3.1085749296 1.2975115874 -0.0112826111  
O -1.6991904673 -2.3098049912 0.0062766621  
O 3.1822039219 -0.940271307 -0.0058165541  
H 1.0270143933 -2.0192467768 0.0007349542  
H 0.8470185518 2.25802133 -0.0099295456  
H -1.1068327481 -3.0662988712 0.0085782111  
H -3.3187074647 -0.9329599145 0.0065900711  
H -2.7101974817 2.1424466427 -0.0025547616  
H 4.0727005949 1.2011932458 -0.0125094716

M06-2X Gallic Acid (Neutral) -0.002 a.u.

C -0.9504238523 -1.1690453915 0.0020914627  
C -1.6858148519 0.0100010267 0.0003112535  
C -1.0386145082 1.2393823829 -0.0039060842  
C 0.346240059 1.2901572482 -0.0063869154  
C 1.0682457791 0.103960019 -0.0045780316

C 0.4281258764 -1.1315950568 -0.0003326029  
O -3.0461648003 0.0062241862 0.0026638867  
O -1.7624358307 2.3834561288 -0.005575343  
C 2.5545628829 0.0907561967 -0.0071738517  
O 3.0935630314 1.3195862924 -0.011759739  
O -1.6994173493 -2.312386264 0.0063411014  
O 3.2201202026 -0.9076636179 -0.0055543534  
H 1.0216981854 -2.0371128616 0.0009326184  
H 0.84422405 2.2482711632 -0.0097645874  
H -1.1260904122 -3.0824226564 0.008120132  
H -3.3506602704 -0.9074991923 0.0061071304  
H -2.6984840996 2.1577782591 -0.0031412981  
H 4.0528869079 1.2093771372 -0.0131007785

M06-2X Gallic Acid (Neutral) -0.004 a.u.

C -0.9507885246 -1.1658966507 0.0020353806  
C -1.6859301161 0.0124087664 0.0002505731  
C -1.0395888298 1.2413590332 -0.0039670949  
C 0.3454639352 1.2930542336 -0.0064452033  
C 1.067002236 0.1069809526 -0.0046346127  
C 0.4273046477 -1.1283237961 -0.0003940076  
O -3.0500650678 0.0035988657 0.0026451722  
O -1.7670196344 2.3855830785 -0.005627712  
C 2.5564082381 0.0886118307 -0.0071869084  
O 3.096900105 1.3141116891 -0.0116573824  
O -1.6992338102 -2.3118015721 0.0063207584  
O 3.2105378156 -0.9158372339 -0.0055957195  
H 1.022894212 -2.0327270841 0.0008769243  
H 0.8450315516 2.2505215627 -0.0097968779  
H -1.1209441108 -3.0783406544 0.008228975  
H -3.342670913 -0.913803523 0.0062264662  
H -2.7011374735 2.1540889718 -0.0030215174  
H 4.0573967389 1.20763653 -0.0129632134

M06-2X Gallic Acid (Neutral) -0.006 a.u.

C -0.9511225592 -1.162750244 0.0019761382  
C -1.6861230748 0.0148350385 0.0001831939  
C -1.0406216611 1.2434282825 -0.0040336897  
C 0.3446390998 1.2960492233 -0.0065050567  
C 1.0659027742 0.1100899718 -0.004688829  
C 0.4265027496 -1.1250215131 -0.0004538099  
O -3.0540397102 0.0008042457 0.0026197197  
O -1.7718273555 2.387739003 -0.0056873226  
C 2.558395443 0.0864588861 -0.0071902546  
O 3.1005181724 1.3086024949 -0.0115516235  
O -1.6991585252 -2.3111559347 0.0062986689

O 3.2010328472 -0.9240070031 -0.0056466015  
H 1.0241629328 -2.0282992797 0.0008272978  
H 0.8457690484 2.2528999204 -0.0098296751  
H -1.1160653897 -3.0742882231 0.0083426153  
H -3.33463288 -0.9202012026 0.00634625  
H -2.7039788085 2.1503196102 -0.0028819594  
H 4.0622078969 1.2057217241 -0.0128310616

M06-2X Gallic Acid (Neutral) -0.008 a.u.

C -0.9514245648 -1.1596046426 0.001917911  
C -1.6863967218 0.0172723831 0.0001140639  
C -1.0417058024 1.2455741482 -0.0041077601  
C 0.3437681926 1.2991314065 -0.0065746185  
C 1.0649436263 0.1132789002 -0.004749977  
C 0.4257193315 -1.1216858753 -0.0005150011  
O -3.0580842775 -0.0021320861 0.0025990692  
O -1.7768490228 2.3899082246 -0.0057561779  
C 2.5604879114 0.084305828 -0.0072042992  
O 3.1043989173 1.3030832199 -0.0114242203  
O -1.6991634955 -2.3104697735 0.0062852486  
O 3.1915935842 -0.9321413448 -0.0057198692  
H 1.0255183124 -2.023818694 0.000778845  
H 0.8464388902 2.2553940622 -0.0098766049  
H -1.1114000719 -3.0702669564 0.0084582109  
H -3.326587718 -0.9266320866 0.0064698602  
H -2.7069913909 2.1464534802 -0.0027266711  
H 4.0672952998 1.2035748064 -0.0126740096

M06-2X Caffeic Acid (Radical) -0.010 a.u.

C 1.2575165929 0.0590618059 -0.7637227252  
C 0.0047402538 -0.0844206433 -0.0161062812  
C -0.0316841158 -0.14287602 1.3469805547  
C 1.171313847 -0.064002947 2.0764234868  
C 2.4065909611 0.0776210782 1.3700538573  
C 2.4618637826 0.1383302643 0.0141665107  
O -1.0939402115 -0.1544205401 -0.7759417324  
C 1.2364700487 -0.12024824 3.5132891064  
C 0.2077698568 -0.2406951528 4.3675065379  
C 0.5085001173 -0.2810611515 5.8336993005  
O -0.6057115925 -0.3713181707 6.5514381396  
O 1.1960696864 0.1014601747 -2.009084192  
O 1.619808995 -0.2361833263 6.2709128941  
H 2.2224779369 -0.0571383165 3.9637289607  
H -0.8294946921 -0.3087741091 4.0668802013  
H -0.3816981808 -0.3913362825 7.495077022  
H -0.7597398549 -0.0847514599 -1.6862890736

H 3.3993016017 0.2474608529 -0.514131256  
H 3.3143310511 0.1363933535 1.9571471246  
H -0.9828340835 -0.2505821699 1.8497445638

M06-2X Caffeic Acid (Radical) -0.002 a.u.

C 1.2537793085 0.0568200808 -0.7636269273  
C 0.0020756762 -0.0814980767 -0.0045299046  
C -0.0142180355 -0.138146478 1.3645321546  
C 1.1937821342 -0.0623883739 2.0707203048  
C 2.4256446872 0.0719786876 1.3588550193  
C 2.4714358255 0.1303090674 0.004090342  
O -1.1030689619 -0.146568233 -0.7334055032  
C 1.259507087 -0.1134011654 3.5152438761  
C 0.2287526372 -0.2410624026 4.3600265554  
C 0.4922282279 -0.271874315 5.8178618312  
O -0.6441572807 -0.4003436775 6.5187854893  
O 1.1812977586 0.1016595035 -1.9967793751  
O 1.5753941272 -0.1925559339 6.3256052761  
H 2.2465541704 -0.0387185613 3.9612483298  
H -0.801734149 -0.3242125447 4.0442907044  
H -0.4110137986 -0.4137274022 7.456600301  
H -0.8126744791 -0.0826970728 -1.6607055507  
H 3.4009785712 0.2324404637 -0.5385572752  
H 3.3391456141 0.1266279895 1.9374586912  
H -0.9620571203 -0.2401225556 1.874058661

M06-2X Caffeic Acid (Radical) -0.004 a.u.

C 1.2543299444 0.0569602447 -0.7634892444  
C 0.0028302914 -0.0820513742 -0.0066511887  
C -0.0176210251 -0.1391988513 1.3611416304  
C 1.1892326276 -0.0630551084 2.0718025924  
C 2.4215959703 0.0727122678 1.3611126955  
C 2.4691254108 0.131655762 0.0060337901  
O -1.1012867418 -0.1478670568 -0.7420864406  
C 1.2548251994 -0.1150129277 3.5155629683  
C 0.2244681646 -0.2411777524 4.3609658536  
C 0.4957140243 -0.2733722704 5.8214931221  
O -0.6358502795 -0.3951850625 6.5251242138  
O 1.1837858326 0.1020434205 -1.9995198006  
O 1.5854090118 -0.1993936881 6.3130118527  
H 2.2414745351 -0.0424029875 3.9627593211  
H -0.8073974476 -0.3214379088 4.0481037518  
H -0.4062114653 -0.4095286217 7.4646112508  
H -0.8009606329 -0.0826484578 -1.6656182026  
H 3.4003505852 0.2354005149 -0.5335408133  
H 3.3338873673 0.1282103447 1.9414737273

H -0.9660493723 -0.2421314872 1.8694819204

M06-2X Caffeic Acid (Radical) -0.006 a.u.

C 1.2550564106 0.0590709708 -0.7633607831  
C 0.0035884697 -0.0836756791 -0.0093439862  
C -0.0216116451 -0.1423972956 1.3569600158  
C 1.1839095252 -0.064487959 2.0730546203  
C 2.4168860809 0.0748362093 1.3638006836  
C 2.466591292 0.1356201176 0.0085203979  
O -1.0989648098 -0.1516111019 -0.7522188614  
C 1.2494398683 -0.1186329555 3.5152470718  
C 0.2194247592 -0.2409244358 4.3625014915  
C 0.4996423616 -0.2764828415 5.8251687422  
O -0.627004102 -0.382526003 6.5330527488  
O 1.1871471791 0.1034784952 -2.0023959993  
O 1.5967878038 -0.2166976415 6.2991938844  
H 2.2359931803 -0.0510944371 3.9634632026  
H -0.8143448063 -0.3145584466 4.053384422  
H -0.3996492525 -0.399470909 7.4739491803  
H -0.7880112733 -0.0835151371 -1.6715920887  
H 3.3996286238 0.242416932 -0.5274757706  
H 3.3277519744 0.1317729994 1.9461960832  
H -0.9706096398 -0.2486018815 1.863667945

M06-2X Caffeic Acid (Radical) -0.008 a.u.

C 1.2560927898 0.0595752992 -0.7634363236  
C 0.0041956563 -0.0844412397 -0.0124312213  
C -0.0262680474 -0.143550853 1.3523038414  
C 1.1780040844 -0.0648116111 2.0746146623  
C 2.4119619768 0.0763987333 1.3667439314  
C 2.4641961167 0.1377454338 0.0112045987  
O -1.0965480614 -0.1537380512 -0.7634122878  
C 1.2434341959 -0.1203606456 3.5145066089  
C 0.2139431589 -0.2405094624 4.3646561629  
C 0.5038914623 -0.2788757131 5.8292603347  
O -0.6170219166 -0.3751627345 6.5416700878  
O 1.1911204485 0.1033652238 -2.0055439041  
O 1.6081087317 -0.2282767189 6.2853349552  
H 2.229807957 -0.0561259196 3.9637405956  
H -0.8216063722 -0.3098783293 4.059512175  
H -0.391691674 -0.3939938512 7.483977784  
H -0.7743840203 -0.0843387479 -1.6784331999  
H 3.3992664645 0.2463568629 -0.5210961735  
H 3.3213063706 0.1344281614 1.951397827  
H -0.9761573215 -0.2512868368 1.8572025454



M06-2X Gallic Acid (Radical) -0.010 a.u.

C -0.9449575942 -1.2080082736 0.0030754053  
C -1.7474163086 0.000511975 0.0014330251  
C -1.0179965685 1.2669132534 -0.003431902  
C 0.3538107926 1.3275023344 -0.0064025258  
C 1.0584757551 0.1243841813 -0.0046864317  
C 0.4183995689 -1.1271605043 0.0000162187  
O -2.9916155576 0.0249585155 0.0040073264  
O -1.7908419126 2.3534571286 -0.004758766  
C 2.560630881 0.0852510985 -0.0078351907  
O 3.1055244264 1.2981030666 -0.012207983  
O -1.6340256597 -2.3638905678 0.0077325894  
O 3.1682806833 -0.9435322577 -0.0064022543  
H 1.0436819416 -2.0126025176 0.0010996238  
H 0.8738937244 2.2741271738 -0.0099969599  
H -1.0109132048 -3.0976606513 0.0090673157  
H -2.7007195811 2.0121308997 -0.0016408781  
H 4.070880614 1.2086381455 -0.0137736129

M06-2X Gallic Acid (Radical) -0.002 a.u.

C -0.9434144574 -1.2177001867 0.0031175269  
C -1.7460538287 -0.0036348445 0.001587989  
C -1.0167208112 1.2643380039 -0.003396517  
C 0.3574315282 1.3174893114 -0.0063665637  
C 1.0598381839 0.1139014586 -0.0045658177  
C 0.4223318426 -1.1388988006 0.000113652  
O -2.9809016293 0.0176474831 0.0042207901  
O -1.7721160352 2.3536769641 -0.0047890944  
C 2.5507637811 0.0929469261 -0.0076092527  
O 3.0924378914 1.3173892862 -0.0125836447  
O -1.6409711148 -2.359535546 0.0075948919  
O 3.2022415242 -0.913522327 -0.0058826332  
H 1.039914785 -2.0285711221 0.0011863523  
H 0.8733886333 2.2655549515 -0.0100432968  
H -1.0411647798 -3.1116728568 0.0086596408  
H -2.6944405642 2.0432895874 -0.001799401  
H 4.0525270509 1.2104247114 -0.0141496217

M06-2X Gallic Acid (Radical) -0.004 a.u.

C -0.9438591538 -1.2152167258 0.0031005988  
C -1.7462774438 -0.0025680626 0.0015434289  
C -1.0169655353 1.264866056 -0.0034066842  
C 0.3566275232 1.3198115715 -0.0063739893  
C 1.0592499387 0.116387809 -0.0045910659  
C 0.4213160019 -1.1359516185 0.0000883872  
O -2.9834329925 0.0196035486 0.0041627346

O -1.7764881677 2.3536313393 -0.0047824536  
C 2.5530727302 0.0909796298 -0.0076436886  
O 3.0952943518 1.3125435127 -0.0125061478  
O -1.6391374647 -2.3606500746 0.007617544  
O 3.1936678828 -0.9210569214 -0.0059881481  
H 1.0406952796 -2.0246136269 0.0011680661  
H 0.8736395048 2.2674723752 -0.0100246319  
H -1.0331982736 -3.1080324544 0.0087591225  
H -2.6957967081 2.0356422212 -0.0017476349  
H 4.0566845264 1.2102744207 -0.0140804379

M06-2X Gallic Acid (Radical) -0.006 a.u.

C -0.9442663927 -1.2127838795 0.0030913638  
C -1.7465603615 -0.0015176891 0.0015105978  
C -1.017231759 1.265474926 -0.0034197127  
C 0.3557784294 1.3222525518 -0.0064004619  
C 1.058849921 0.118940867 -0.0046404502  
C 0.4203209549 -1.1330352881 0.0000543871  
O -2.9860610774 0.0214446538 0.0041226787  
O -1.7809846922 2.3536215042 -0.0047740874  
C 2.5553917219 0.0890684084 -0.0077313295  
O 3.0983341719 1.3078238275 -0.012403868  
O -1.6373742166 -2.361756548 0.0076603063  
O 3.1851555871 -0.9285247508 -0.0060961173  
H 1.0415724085 -2.0206649631 0.0011351972  
H 0.8738482244 2.2695305794 -0.0100382066  
H -1.0255093605 -3.1044942474 0.0088625365  
H -2.6971862438 2.0278727538 -0.0016930364  
H 4.0610146846 1.2098702941 -0.0139447974

M06-2X Gallic Acid (Radical) -0.008 a.u.

C -0.9446244684 -1.2103854369 0.003082114  
C -1.7469504998 -0.0004918561 0.0014718932  
C -1.0175843804 1.2661657259 -0.0034271476  
C 0.3548317812 1.3248241494 -0.0064050823  
C 1.0585828851 0.1216205461 -0.0046665183  
C 0.4193514216 -1.130096661 0.0000330424  
O -2.9887818373 0.0232388196 0.0040662075  
O -1.785804942 2.3535488011 -0.0047665927  
C 2.5579352467 0.0871466149 -0.007785175  
O 3.1017824215 1.3029698342 -0.01230737  
O -1.6356667738 -2.3628325211 0.0076951677  
O 3.1766815985 -0.9360408526 -0.0062391755  
H 1.0425887817 -2.0166409062 0.0011160899  
H 0.8739194458 2.2717593859 -0.0100216315  
H -1.0180864181 -3.1010377497 0.0089648309

H -2.698871952 2.0200396341 -0.0016599666  
H 4.0657896895 1.2093354725 -0.0138556859

M06-2X Caffeic Acid (Neutral) Zero field

C 1.2637419987 0.0484522436 -0.7102414337  
C 0.0461384129 -0.0690011709 -0.0276648946  
C 0.0379937369 -0.1164961627 1.3488024771  
C 1.2340880772 -0.0480359223 2.0721572619  
C 2.4346852291 0.0712187544 1.3776085758  
C 2.451339216 0.1181405495 -0.0099050246  
O -1.1162276822 -0.1342859427 -0.7155785985  
C 1.2718233721 -0.0974655029 3.5312471743  
C 0.239852298 -0.2477918447 4.3621854379  
C 0.4801616176 -0.2721316353 5.8166536017  
O -0.666972443 -0.4328027174 6.5060480556  
O 1.1644639126 0.0881712668 -2.068784973  
O 1.5451837721 -0.1655829395 6.3625162014  
H 2.253335241 -0.001709355 3.9868413718  
H -0.7837974363 -0.3571960805 4.0333580871  
H -0.432905991 -0.4395708958 7.4425620273  
H 2.0331274091 0.1625664373 -2.469979127  
H -0.9250338604 -0.0836137429 -1.6581179027  
H 3.3876720386 0.2104610795 -0.5473451678  
H 3.3650666369 0.1265350663 1.9269727353  
H -0.9186245558 -0.2061894848 1.8452481147

M06-2X Caffeic Acid (Neutral) 0.010 a.u.

C 1.2721230102 0.0512247053 -0.7108576941  
C 0.0479588369 -0.0703746104 -0.0153476223  
C 0.0496757424 -0.1182189479 1.3576608174  
C 1.2542263876 -0.0453090165 2.0783726216  
C 2.4539447743 0.0780166599 1.3735878309  
C 2.4663777627 0.1249557258 -0.0120207634  
O -1.109275044 -0.1387994324 -0.6875841978  
C 1.2955067338 -0.0975675748 3.5203903703  
C 0.2548054393 -0.2346204257 4.3662872358  
C 0.4641394128 -0.2732346985 5.799970368  
O -0.7104172136 -0.4243290135 6.4845255014  
O 1.1446916236 0.0857460355 -2.0422784727  
O 1.5019144092 -0.1916737635 6.4205207023  
H 2.2814496117 -0.0182691064 3.9713047857  
H -0.7655140213 -0.3264958511 4.0248995517  
H -0.4507595799 -0.4465282425 7.4109661169  
H 1.9823607088 0.1598419265 -2.5115568787  
H -0.9480209857 -0.1000457112 -1.6396337499  
H 3.3976801223 0.2184836157 -0.5560126958

H 3.3883480533 0.1352896605 1.9171703994  
H -0.9061047843 -0.2144199346 1.8542197734

M06-2X Caffeic Acid (Neutral) 0.002 a.u.

C 1.2651423493 0.0491646211 -0.7098956417  
C 0.0469755493 -0.0684719922 -0.0240663025  
C 0.0417493452 -0.1158746781 1.351737479  
C 1.2398892023 -0.0468330221 2.0731720279  
C 2.4395176428 0.0727416993 1.3766138065  
C 2.4541885861 0.1193576308 -0.0110151159  
O -1.1151034801 -0.1340216296 -0.7076711868  
C 1.2779912971 -0.0969485693 3.5299562725  
C 0.243973459 -0.2455388018 4.36179871  
C 0.4761586618 -0.2724539377 5.8130845977  
O -0.6769888977 -0.4334637424 6.4991518705  
O 1.1585694997 0.0877551289 -2.0632255776  
O 1.5348566519 -0.1687678693 6.3749877488  
H 2.2600798933 -0.0036610632 3.9850738366  
H -0.7785728883 -0.3524666871 4.0294747387  
H -0.4401020226 -0.4422769179 7.4342605704  
H 2.0212059148 0.158864304 -2.4789258012  
H -0.9303452607 -0.086923363 -1.6523030123  
H 3.389188076 0.2115491871 -0.5502961526  
H 3.3711905383 0.1283092212 1.9239628961  
H -0.9144531177 -0.2063675186 1.8487082356

M06-2X Caffeic Acid (Neutral) 0.004 a.u.

C 1.2666670962 0.0498190001 -0.7097862992  
C 0.0476458845 -0.068613195 -0.0210843716  
C 0.0448297726 -0.1161517528 1.3540775248  
C 1.2447744644 -0.0462153468 2.0742681087  
C 2.4438219244 0.0741818707 1.3757417355  
C 2.4570824517 0.120785895 -0.011758856  
O -1.1137948961 -0.134763406 -0.7009212697  
C 1.2834139609 -0.097051165 3.5282355291  
C 0.2474869698 -0.2429615042 4.3620007294  
C 0.4726176641 -0.2727511583 5.809641861  
O -0.6863306899 -0.432100791 6.4935886451  
O 1.1536804706 0.0873969247 -2.0578157875  
O 1.5255163807 -0.1737724326 6.3868502453  
H 2.2662863976 -0.0071071579 3.9826438583  
H -0.7742345362 -0.3463218251 4.0266824413  
H -0.4454973875 -0.4435706199 7.4270137188  
H 2.0101286572 0.157839085 -2.4874798763  
H -0.9352644689 -0.0903890371 -1.6475185698  
H 3.3908946553 0.2132175469 -0.5526025283

H 3.3764948778 0.1301603078 1.921578747  
H -0.9111086492 -0.2079592386 1.8512284141

M06-2X Caffeic Acid (Neutral) 0.006 a.u.

C 1.2683520604 0.0504180704 -0.7098955093  
C 0.0480665616 -0.0691207689 -0.0186638619  
C 0.0471785718 -0.1168652643 1.3558212982  
C 1.2487705115 -0.0458942841 2.0754736573  
C 2.4476167465 0.0755538832 1.3749982858  
C 2.4600405361 0.1223039938 -0.0121562483  
O -1.1123355142 -0.1360556163 -0.6953831578  
C 1.2880667399 -0.0973928079 3.526068355  
C 0.2503912779 -0.2402079226 4.3627801726  
C 0.469484872 -0.2730030427 5.8062967377  
O -0.6949391183 -0.4296514416 6.4893439479  
O 1.149740945 0.0870314072 -2.0525343094  
O 1.5170327502 -0.1797216703 6.3982349003  
H 2.2718610252 -0.0111723993 3.9795649107  
H -0.7707408698 -0.3395389813 4.0250382402  
H -0.4489938521 -0.444281663 7.420785294  
H 1.999948113 0.158118329 -2.4957192481  
H -0.939747213 -0.0937870658 -1.6438506449  
H 3.3928470109 0.2151569704 -0.5542717895  
H 3.3810693475 0.1320076832 1.9197125266  
H -0.9085995023 -0.2102254091 1.852940443

M06-2X Caffeic Acid (Neutral) 0.008 a.u.

C 1.2701776103 0.0508927078 -0.7102420753  
C 0.04818415 -0.0697347374 -0.01677464  
C 0.0487796776 -0.1175914931 1.357000417  
C 1.2518949224 -0.0456085234 2.0768296816  
C 2.4509604542 0.0768460572 1.3743158832  
C 2.4631207518 0.1237183462 -0.0122282324  
O -1.1108001501 -0.1374595974 -0.6909837539  
C 1.2920375631 -0.0976045523 3.5234572541  
C 0.2527845083 -0.2374093127 4.3641910712  
C 0.4666959169 -0.2731781211 5.8030609894  
O -0.7028996169 -0.4269518126 6.4863451489  
O 1.1467518103 0.0864616857 -2.0473539897  
O 1.5092407183 -0.1858206348 6.4093452204  
H 2.2768529305 -0.0150007021 3.9758129509  
H -0.7679005531 -0.3328346634 4.0244728097  
H -0.4506625678 -0.4451696604 7.4154642696  
H 1.9907000094 0.1588971568 -2.503694695  
H -0.9439357629 -0.0970239688 -1.6412585918  
H 3.3950986027 0.2169499933 -0.5553735034

H 3.3849815207 0.133741223 1.9182934878  
H -0.9069514958 -0.2124473905 1.8539042977

M06-2X Gallic Acid (Neutral) Zero field

C -0.9500148272 -1.1722007197 0.0021468286  
C -1.685770671 0.0076103003 0.0003697177  
C -1.0376858094 1.2374967185 -0.0038498132  
C 0.3469677907 1.2873565572 -0.0063346031  
C 1.069645658 0.1010244616 -0.0045252164  
C 0.4289660388 -1.134838198 -0.000271866  
O -3.0423190125 0.00868457 0.002684758  
O -1.7580647769 2.3813613807 -0.0055282476  
C 2.5528158024 0.0929006088 -0.0071643303  
O 3.0904879622 1.3250523468 -0.0118549811  
O -1.6996982299 -2.3129202947 0.0063645802  
O 3.2297642741 -0.8994748358 -0.005517357  
H 1.0205866165 -2.0414498809 0.0009898635  
H 0.8433525407 2.2461427956 -0.0097406417  
H -1.1314938855 -3.0865389084 0.0080136626  
H -3.3586162508 -0.9012828681 0.0059851538  
H -2.6960095221 2.1613968612 -0.003243817  
H 4.048647302 1.2109041052 -0.0132296909

M06-2X Gallic Acid (Neutral) 0.010 a.u.

C -0.9470573824 -1.1886667641 0.0024025001  
C -1.6867299839 -0.0042795349 0.0006302047  
C -1.033706445 1.2296735628 -0.0035975841  
C 0.3496833039 1.2750348131 -0.006097297  
C 1.0792500385 0.0878424654 -0.0042552758  
C 0.4334995872 -1.1505144417 0.0000429029  
O -3.0236981548 0.0188355789 0.0027947289  
O -1.7394357304 2.3713822192 -0.0053153291  
C 2.5452547159 0.1033465129 -0.0070620144  
O 3.079048265 1.3522113602 -0.0123425002  
O -1.701695874 -2.3154757246 0.0064665711  
O 3.2786346373 -0.8590824994 -0.0053169858  
H 1.0170015086 -2.0619199342 0.0013096708  
H 0.8377168543 2.2376557429 -0.0096571022  
H -1.1616189623 -3.1081890537 0.0075300385  
H -3.3994127586 -0.8706497115 0.0052695847  
H -2.6865026519 2.1789340766 -0.003566547  
H 4.0313300327 1.2150863321 -0.013941566

M06-2X Gallic Acid (Neutral) 0.002 a.u.

C -0.949552351 -1.1753773124 0.002201138  
C -1.6857947366 0.0052287845 0.0004262451

C -1.0368072607 1.2357038445 -0.0037967665  
C 0.3476359274 1.284669851 -0.0062863086  
C 1.0711976947 0.0981938457 -0.0044746233  
C 0.4298288 -1.1380414495 -0.0002114883  
O -3.0385293083 0.0110048908 0.0027074087  
O -1.7539223527 2.3792960856 -0.0054847523  
C 2.5511577385 0.0950332581 -0.007155619  
O 3.0876896123 1.3304780639 -0.0119461586  
O -1.7000381976 -2.3134358053 0.0063893203  
O 3.2394287713 -0.891315587 -0.0054823147  
H 1.0196173831 -2.0456923829 0.0010481291  
H 0.8424012123 2.2441561072 -0.0097223987  
H -1.1370941829 -3.090700693 0.0079126078  
H -3.366613762 -0.8951098429 0.0058553979  
H -2.693732603 2.1649423301 -0.0033299151  
H 4.0446886151 1.2121910116 -0.0133559017

M06-2X Gallic Acid (Neutral) 0.004 a.u.

C -0.9490335194 -1.1786006462 0.0022540499  
C -1.6858960389 0.0028455907 0.0004809877  
C -1.0359825142 1.2340109487 -0.0037448937  
C 0.3482389441 1.2821041165 -0.0062391933  
C 1.0729063062 0.0954749015 -0.0044237307  
C 0.4307182633 -1.1411984895 -0.000150429  
O -3.0347893358 0.0132047985 0.002730523  
O -1.7500091809 2.3772517071 -0.0054420009  
C 2.5495920444 0.0971371342 -0.0071446525  
O 3.0851691763 1.3358520255 -0.0120404962  
O -1.7003965628 -2.3139595332 0.0064124725  
O 3.2491035404 -0.88322128 -0.00544268  
H 1.0188172401 -2.0498228208 0.0011080375  
H 0.841355122 2.2423240547 -0.0097061809  
H -1.1428536935 -3.0949321251 0.0078170129  
H -3.3747294581 -0.8889272613 0.0057141671  
H -2.6916597287 2.1684306958 -0.0034013099  
H 4.0410103956 1.213251183 -0.0134876835

M06-2X Gallic Acid (Neutral) 0.006 a.u.

C -0.9484523131 -1.1818879886 0.0023060175  
C -1.6860866408 0.0004583451 0.0005346022  
C -1.0352023292 1.2324310686 -0.0036940156  
C 0.3487791506 1.2796506676 -0.006193732  
C 1.0747980961 0.0928551998 -0.0043731638  
C 0.4316325181 -1.1443162065 -0.0000889217  
O -3.0310816726 0.0152681394 0.0027557908  
O -1.746305387 2.3752342529 -0.0053990413

C 2.5481016211 0.0992138271 -0.0071322666  
O 3.0829093962 1.3412234243 -0.0121367686  
O -1.7007683355 -2.3144901113 0.0064346614  
O 3.2588287412 -0.8751738145 -0.0053993029  
H 1.0181500604 -2.0538725382 0.0011696847  
H 0.8402140783 2.2406414084 -0.0096930098  
H -1.1488061455 -3.099255488 0.0077242817  
H -3.3829584233 -0.8827441046 0.0055641638  
H -2.6897781695 2.1719026824 -0.0034617382  
H 4.0375867545 1.2140862359 -0.0136232418

M06-2X Gallic Acid (Neutral) 0.008 a.u.

C -0.9477969024 -1.1852399287 0.002356164  
C -1.6863645682 -0.0019197215 0.0005855803  
C -1.0344470204 1.2309805711 -0.0036450638  
C 0.3492615016 1.2772978072 -0.0061488329  
C 1.0769041471 0.0903165475 -0.0043204248  
C 0.4325627781 -1.1474136114 -0.0000260018  
O -3.0273911216 0.0171527362 0.0027809702  
O -1.742785518 2.3732727609 -0.0053565501  
C 2.5466591311 0.1012782333 -0.0071115472  
O 3.0808741721 1.3466593016 -0.0122353874  
O -1.7011889351 -2.3150039882 0.0064544629  
O 3.2686541092 -0.8671370828 -0.0053546581  
H 1.0175580534 -2.0578909648 0.0012348543  
H 0.8389981914 2.23909053 -0.0096805102  
H -1.1550332763 -3.1036750365 0.0076296396  
H -3.3912064244 -0.8766376315 0.0054138063  
H -2.6880655748 2.1754020903 -0.0035151822  
H 4.0343682572 1.2146923873 -0.0137673189

M06-2X Caffeic Acid (Radical) Zero field

C 1.2537415845 0.0547834346 -0.7640775519  
C 0.0010789182 -0.0795260134 -0.0027501268  
C -0.0118544058 -0.1335519231 1.3675189323  
C 1.197312997 -0.0594224674 2.069986357  
C 2.4292587961 0.0709949517 1.3568205031  
C 2.4740493484 0.1263901661 0.0023964931  
O -1.1048000827 -0.1428305071 -0.7257194294  
C 1.2632157058 -0.1085656045 3.5145604542  
C 0.2326216524 -0.2427914234 4.3595515418  
C 0.4890629382 -0.2706655628 5.8143605155  
O -0.6511358916 -0.4105508812 6.5133415861  
O 1.1798961062 0.0976258341 -1.9943908128  
O 1.5654969942 -0.1812057601 6.3377715493  
H 2.2502925883 -0.0274325504 3.9594285335



H -0.7960874899 -0.3346286385 4.0413264116  
H -0.4137325733 -0.4214350366 7.4493532597  
H -0.8233436476 -0.0821905901 -1.6565914154  
H 3.4023326972 0.2246622529 -0.5430642226  
H 3.3438202704 0.1243782708 1.9339556474  
H -0.959574506 -0.2315189513 1.8779947743

M06-2X Caffeic Acid (Radical) 0.010 a.u.

C 1.2574620963 0.0570223942 -0.769005036  
C -0.0055791363 -0.0809455524 -0.0003600734  
C -0.0083222025 -0.1345341942 1.3736696308  
C 1.2053174961 -0.0588492931 2.069646518  
C 2.4429520292 0.0720506359 1.3492868183  
C 2.4888976186 0.1280107879 0.000082785  
O -1.1074882558 -0.1454489962 -0.7039700508  
C 1.2744764481 -0.106732739 3.5025968988  
C 0.2418182286 -0.2371501019 4.3660076063  
C 0.4778688723 -0.2679897603 5.7983954682  
O -0.6812011262 -0.412708847 6.5053325079  
O 1.1817490994 0.1024553518 -1.9833734637  
O 1.5309741855 -0.1830971499 6.3893408262  
H 2.2662581981 -0.0291116027 3.9386666035  
H -0.784610466 -0.3263347645 4.0424622492  
H -0.4064459084 -0.4279970042 7.4277820496  
H -0.8678656988 -0.089629762 -1.6503451142  
H 3.4120101405 0.2245804224 -0.5549131938  
H 3.3588409891 0.1237176194 1.9253794083  
H -0.9554606078 -0.234788444 1.8850905616

M06-2X Caffeic Acid (Radical) 0.002 a.u.

C 1.2538402423 0.0542860775 -0.7645584883  
C 0.0000368351 -0.0790211707 -0.0014419314  
C -0.0098758077 -0.1321466604 1.36979201  
C 1.2003662024 -0.0583767795 2.0694522194  
C 2.4325704406 0.0707310996 1.355115553  
C 2.4766043271 0.125222228 0.0012341738  
O -1.1060229723 -0.1418670009 -0.7193076024  
C 1.266541108 -0.1067869586 3.5132104947  
C 0.2356784601 -0.2423372293 4.3596662257  
C 0.4863373709 -0.2697038877 5.8110156876  
O -0.6578934293 -0.4149814278 6.509206501  
O 1.1789200396 0.096911075 -1.9919242534  
O 1.5569286131 -0.1767795847 6.3490680729  
H 2.2542054508 -0.0241447309 3.9566599564  
H -0.7919859697 -0.3364248905 4.0394643645  
H -0.4152850639 -0.4254119888 7.4431645902

H -0.8334478257 -0.0830590577 -1.6535344822  
H 3.4035721534 0.2219951536 -0.5467122896  
H 3.3478934218 0.1234942457 1.9312419603  
H -0.9573315966 -0.2290795119 1.8809602378

M06-2X Caffeic Acid (Radical) 0.004 a.u.

C 1.2542230046 0.0545184391 -0.7651993469  
C -0.0011199884 -0.0791159724 -0.0005537643  
C -0.008490696 -0.1320060911 1.3714894464  
C 1.2027481927 -0.0580538328 2.0691402602  
C 2.4355599994 0.0708520872 1.3536206072  
C 2.4792837762 0.1252315005 0.0004846273  
O -1.1068926914 -0.1420527238 -0.7139550388  
C 1.2693014749 -0.1061858219 3.5112970457  
C 0.2380454141 -0.2413876491 4.3602958168  
C 0.4839112723 -0.2690947062 5.807712467  
O -0.6642476036 -0.4163321484 6.5063405177  
O 1.1786575007 0.0974874668 -1.9895324467  
O 1.5493740412 -0.1760538019 6.3596090838  
H 2.257775678 -0.0237741278 3.9531962493  
H -0.7889537198 -0.3355249787 4.038623875  
H -0.4153267687 -0.4271712201 7.4379485891  
H -0.8429355753 -0.084415852 -1.6513603511  
H 3.4050548903 0.221429079 -0.5496124141  
H 3.3513983194 0.1232490273 1.9291293088  
H -0.9557145206 -0.2290796737 1.8830984675

M06-2X Caffeic Acid (Radical) 0.006 a.u.

C 1.2549496741 0.0551922457 -0.766089327  
C -0.002426345 -0.0795795561 -0.0000882405  
C -0.0077771702 -0.1326164847 1.3726432031  
C 1.2043587588 -0.0581791126 2.0690695814  
C 2.438239152 0.0711778744 1.3522433842  
C 2.4821810687 0.1259256058 0.00012038  
O -1.1074053695 -0.1429200418 -0.7096927318  
C 1.2714800249 -0.1062415722 3.5088530157  
C 0.2397791403 -0.2401205949 4.361519195  
C 0.4817530831 -0.2686581989 5.8044723272  
O -0.670155211 -0.4158492037 6.5047634721  
O 1.1790827988 0.0988548096 -1.987250891  
O 1.5426684715 -0.1774895851 6.3696397372  
H 2.26093468 -0.0250919858 3.949030831  
H -0.7868512632 -0.3330180341 4.0388836537  
H -0.4137555966 -0.4277223392 7.4336876767  
H -0.8517831593 -0.0860409272 -1.6501533132  
H 3.406910073 0.2220846689 -0.5518280282

H 3.354336483 0.123331477 1.9275484757  
H -0.9548672937 -0.230520045 1.8844005987

M06-2X Caffeic Acid (Radical) 0.008 a.u.

C 1.255978464 0.0564580863 -0.7672906276  
C -0.0038801472 -0.0805183237 -0.0000314701  
C -0.0076362592 -0.1342310872 1.3733435261  
C 1.205272122 -0.0589347788 2.0692142437  
C 2.4407125786 0.0716515097 1.3508456644  
C 2.4853127082 0.1274481241 0.0000388213  
O -1.1075770181 -0.1446569256 -0.7063979378  
C 1.2732388467 -0.1071023383 3.5059301583  
C 0.2409847039 -0.2383167367 4.3634147876  
C 0.4797780705 -0.2683173166 5.8013683321  
O -0.6759007096 -0.4132950984 6.5044383105  
O 1.1800452654 0.1013985858 -1.9851433645  
O 1.5367028234 -0.1811865857 6.3794623066  
H 2.2639062156 -0.028526099 3.9441110455  
H -0.7856049417 -0.3282581098 4.0402456684  
H -0.4109095687 -0.4270855456 7.4303323984  
H -0.8600336605 -0.0879855323 -1.6498197392  
H 3.4090833714 0.224236083 -0.5535886425  
H 3.3568400861 0.1236513285 1.9263166227  
H -0.9546609507 -0.2339102398 1.8849828962

M06-2X Gallic Acid (Radical) Zero field

C -0.9429119638 -1.2202473081 0.0031376008  
C -1.7459276454 -0.0047236154 0.001633823  
C -1.0165227094 1.263912325 -0.0033853769  
C 0.358166233 1.315298191 -0.0063569748  
C 1.0605916131 0.111515479 -0.0045392738  
C 0.4233687888 -1.1418571328 0.0001424424  
O -2.9784532019 0.0155929382 0.0042768757  
O -1.7679627537 2.3537200595 -0.0047957179  
C 2.5485628198 0.0949292274 -0.0075799994  
O 3.0898657045 1.322235936 -0.0126520955  
O -1.6428608374 -2.3584079829 0.0075766909  
O 3.2108502288 -0.9059992352 -0.0057966601  
H 1.0392569954 -2.032497493 0.0012080666  
H 0.8730610775 2.2637944187 -0.0100613775  
H -1.0494075307 -3.1154104754 0.0085607326  
H -2.6932455917 2.050865204 -0.0018588088  
H 4.0486607731 1.2104024639 -0.0142149471

M06-2X Gallic Acid (Radical) 0.010 a.u.

C -0.9391701868 -1.234504414 0.0032307864

C -1.7470046211 -0.0106342731 0.0017041649  
C -1.0158946548 1.2635870472 -0.0033236897  
C 0.3608064549 1.3064055114 -0.006265612  
C 1.0672735046 0.1010688465 -0.0044071748  
C 0.4286826255 -1.1571615454 0.0003151333  
O -2.967177564 0.0033783344 0.00464571  
O -1.7499333987 2.3542870284 -0.0048071277  
C 2.5383489489 0.1052736202 -0.0074606714  
O 3.0808345188 1.3474605984 -0.0128644684  
O -1.6531087004 -2.3528367857 0.0075487183  
O 3.2547115561 -0.868353752 -0.0056262008  
H 1.0376560673 -2.0519389867 0.0013848003  
H 0.8705778291 2.2572750025 -0.0100836011  
H -1.0951234068 -3.1358672375 0.008120873  
H -2.6892780217 2.0883559983 -0.0022782283  
H 4.0328910492 1.2073280072 -0.014538412

M06-2X Gallic Acid (Radical) 0.002 a.u.

C -0.9423376644 -1.2228815582 0.0031606546  
C -1.7459110734 -0.0058372972 0.0016821293  
C -1.0163626098 1.2636003901 -0.0033735  
C 0.3588346548 1.313233637 -0.006346156  
C 1.0615250713 0.1092238529 -0.0045113286  
C 0.4244256237 -1.1448420849 0.0001752869  
O -2.9760768789 0.0134246979 0.0043292072  
O -1.7640169718 2.3537697626 -0.0048020061  
C 2.5464493601 0.096936986 -0.0075545793  
O 3.0875745538 1.3271183281 -0.0127153263  
O -1.6448089767 -2.3572706585 0.0075614987  
O 3.2195195972 -0.89846452 -0.0057230365  
H 1.0387050781 -2.0364169229 0.0012342512  
H 0.8726628448 2.2621843669 -0.0100803393  
H -1.057955926 -3.1192636567 0.0084593623  
H -2.6922093224 2.0584028398 -0.0019217283  
H 4.0450746397 1.2102048371 -0.0142793897

M06-2X Gallic Acid (Radical) 0.004 a.u.

C -0.9416805462 -1.2256205549 0.0031874627  
C -1.746008369 -0.0069809563 0.0017359571  
C -1.0162306001 1.2634108768 -0.0033614656  
C 0.3594341829 1.3113007199 -0.0063347387  
C 1.0626542997 0.1070291768 -0.0044803642  
C 0.4254956832 -1.1478613823 0.0002136119  
O -2.9737646664 0.0111308309 0.0043728962  
O -1.7602740663 2.3538412711 -0.0048090766  
C 2.5443958954 0.0989829012 -0.0075296562

O 3.0855715609 1.3320670076 -0.0127729551  
O -1.6468164981 -2.3561382815 0.0075485737  
O 3.2282647926 -0.8909010402 -0.0056627755  
H 1.0382480563 -2.0403383393 0.0012663104  
H 0.872195986 2.2607265332 -0.0101018591  
H -1.0668237107 -3.1232509933 0.0083534549  
H -2.6913347205 2.0659237731 -0.0019840716  
H 4.0417647204 1.2098014571 -0.0143463043

M06-2X Gallic Acid (Radical) 0.006 a.u.

C -0.9410086726 -1.2284243728 0.0032108436  
C -1.746201147 -0.0081236409 0.0017710501  
C -1.0161146214 1.2633527702 -0.0033561103  
C 0.3600059002 1.3095141691 -0.0063459788  
C 1.0639973806 0.1048827765 -0.004487374  
C 0.4265780216 -1.1509399522 0.0002312671  
O -2.9716491325 0.0087758102 0.0044634132  
O -1.7566643992 2.353992394 -0.0048128928  
C 2.5424304253 0.1010156261 -0.0075671434  
O 3.0836732215 1.3371225362 -0.0127887888  
O -1.6488756947 -2.3550563491 0.0075599076  
O 3.2370452734 -0.8834861373 -0.0056059616  
H 1.0378785363 -2.0443027704 0.0012774944  
H 0.8717553446 2.2594225537 -0.0101502694  
H -1.0758390814 -3.1272931039 0.0082784978  
H -2.6904855428 2.0733181354 -0.0020488751  
H 4.038566188 1.2093525552 -0.0143340795

M06-2X Gallic Acid (Radical) 0.008 a.u.

C -0.9402081994 -1.2313716571 0.0032413778  
C -1.7465476649 -0.0093213976 0.0018319851  
C -1.016039869 1.263429399 -0.003353471  
C 0.36046064 1.3078927365 -0.0063699001  
C 1.0655338919 0.1028910007 -0.0045004033  
C 0.4276523505 -1.1540303529 0.0002496705  
O -2.9695653946 0.0062424704 0.0045429234  
O -1.7533022839 2.3541645976 -0.0048193993  
C 2.5404904632 0.1030968805 -0.0076256772  
O 3.0821848166 1.3422102273 -0.0127888911  
O -1.65096416 -2.3539954437 0.0075743747  
O 3.2458835505 -0.876035881 -0.0055513754  
H 1.0376558508 -2.0481909484 0.0012829751  
H 0.8711979546 2.2582993064 -0.0102235175  
H -1.0852013433 -3.1315166094 0.008195315  
H -2.6898837369 2.0807854862 -0.0020896066  
H 4.035745134 1.2085731853 -0.01430138

M11 Caffeic Acid (Neutral) -0.010 a.u.

C 1.2543318116 0.0741322851 -0.7057322172  
C 0.0468395268 -0.143542231 -0.0517127935  
C 0.0224176309 -0.2481782386 1.3237248126  
C 1.2000127495 -0.1337355371 2.0630966991  
C 2.3994176271 0.0746048955 1.388274875  
C 2.4281822672 0.1817334032 0.0078517714  
O -1.1006218229 -0.254847577 -0.7831906996  
C 1.2372763101 -0.2240817484 3.5292262919  
C 0.2109838864 -0.1772347906 4.3653203853  
C 0.505108318 -0.270604092 5.8305593052  
O -0.607308858 -0.197559392 6.5614173393  
O 1.1940772115 0.1665147652 -2.0900299745  
O 1.6090831746 -0.3934533885 6.2768578544  
H 2.2223578694 -0.3173744495 3.9857170206  
H -0.8260379121 -0.0612511173 4.0666076163  
H -0.3820525854 -0.2540205683 7.5031596576  
H 2.0674020765 0.3893495632 -2.4164915444  
H -0.8745854406 -0.1377383034 -1.7102905337  
H 3.3683115577 0.3492340539 -0.5136551822  
H 3.3182069666 0.1594748998 1.9590620095  
H -0.9282913651 -0.427750432 1.8148113071

M11 Caffeic Acid (Neutral) -0.002 a.u.

C 1.2620981448 0.037954529 -0.7049096025  
C 0.0447133356 -0.0527778308 -0.0261393649  
C 0.0327066772 -0.084683141 1.350109919  
C 1.2272312902 -0.027235414 2.0703816101  
C 2.4286111224 0.0694237767 1.3797149818  
C 2.448704542 0.0999416619 -0.0069104703  
O -1.1135374259 -0.1064282933 -0.7272774249  
C 1.2621513631 -0.0685930105 3.5352144622  
C 0.2363334989 -0.2653945406 4.3550202131  
C 0.483800007 -0.273614908 5.8147031819  
O -0.6467799471 -0.4869087206 6.512388679  
O 1.168644195 0.0644526789 -2.0708724032  
O 1.5502552419 -0.1135446974 6.3439238986  
H 2.2370509274 0.0695739042 4.0018926417  
H -0.7839297379 -0.4266945748 4.0259072011  
H -0.4204110271 -0.479642291 7.4522070202  
H 2.038796426 0.1207733036 -2.4717108546  
H -0.9138588486 -0.0671091028 -1.6690028857  
H 3.3896159813 0.1743546295 -0.5455740142  
H 3.3598485095 0.119340866 1.9344931211  
H -0.9269342757 -0.1495168253 1.8510240905

M11 Caffeic Acid (Neutral) -0.004 a.u.

C 1.2603733305 0.0525461813 -0.7059929609  
C 0.0455151178 -0.0801401844 -0.0329722612  
C 0.0305086975 -0.1361067918 1.3430496174  
C 1.2208578137 -0.0606089393 2.067941743  
C 2.4215179575 0.0718224955 1.3810611753  
C 2.4437342168 0.128332188 -0.0043041535  
O -1.1104938228 -0.1523177748 -0.7410604631  
C 1.2573285084 -0.1156413772 3.5336475843  
C 0.2260834034 -0.2402737715 4.3589941756  
C 0.4904615718 -0.2741699087 5.8197837467  
O -0.6437979339 -0.3911744875 6.528257332  
O 1.1750360668 0.1006048626 -2.0764994645  
O 1.5763897875 -0.2064108247 6.3257327176  
H 2.2411865875 -0.0456221733 3.9965675876  
H -0.8073366242 -0.3198315741 4.0401468032  
H -0.4142499286 -0.4062937579 7.4679595621  
H 2.0496851723 0.1926494924 -2.4599138393  
H -0.9043945432 -0.0901490062 -1.6795588563  
H 3.3844870684 0.2332098781 -0.5387612521  
H 3.3497540726 0.1324727493 1.9396725746  
H -0.9275355196 -0.2392252759 1.8408326314

M11 Caffeic Acid (Neutral) -0.006 a.u.

C 1.2563415355 0.071740742 -0.7043443695  
C 0.0483709414 -0.1255416751 -0.0384535024  
C 0.033816657 -0.2182016663 1.3363855398  
C 1.2189154855 -0.1136649485 2.0653809409  
C 2.4154395372 0.0747718747 1.3832160808  
C 2.4360041019 0.1704238434 0.0006009609  
O -1.1039005044 -0.2273425953 -0.7537580803  
C 1.2561925828 -0.1933095123 3.5310365629  
C 0.2216622298 -0.1913968914 4.3601026168  
C 0.492962537 -0.2706936983 5.8220733644  
O -0.6383987062 -0.2513906358 6.5384794042  
O 1.1762194701 0.1512958906 -2.0786711151  
O 1.5867987997 -0.3415960652 6.3076113787  
H 2.242931615 -0.2443900552 3.9902454281  
H -0.8152190907 -0.1251256852 4.0481182544  
H -0.4117177523 -0.3005254017 7.4784966174  
H 2.0464154482 0.3260984605 -2.4419503404  
H -0.8938946382 -0.1313612712 -1.6879904265  
H 3.3733758092 0.3217355293 -0.5292420302  
H 3.340196415 0.1525074762 1.9453633504  
H -0.9174014735 -0.3803607153 1.8318843648

M11 Caffeic Acid (Neutral) -0.008 a.u.

C 1.2548694551 0.0740146176 -0.7048042521  
C 0.0478427737 -0.136910051 -0.0446913276  
C 0.028999431 -0.2363867292 1.3304166782  
C 1.2102617658 -0.1244045822 2.0642254756  
C 2.4075986044 0.077061374 1.3856423767  
C 2.4315632873 0.179613726 0.0041604643  
O -1.1020055793 -0.2461944855 -0.7677072788  
C 1.2475957399 -0.2100505897 3.5302438327  
C 0.2167893428 -0.1825187126 4.3623508513  
C 0.4986406742 -0.2702585924 5.8260920222  
O -0.6237515724 -0.22068968 6.5492929488  
O 1.184090897 0.1602863418 -2.0840805191  
O 1.5974752552 -0.3708576699 6.2924444024  
H 2.2334459836 -0.2854371311 3.9881495558  
H -0.8199923176 -0.0874369271 4.0565781433  
H -0.3983525464 -0.2746469319 7.4902250391  
H 2.05658202 0.3570963311 -2.4294808649  
H -0.8843911272 -0.1400727484 -1.6985989036  
H 3.3697894579 0.3416808842 -0.5216938147  
H 3.3293749123 0.16010316 1.9518605491  
H -0.9213154573 -0.4103196036 1.8239586213

M11 Gallic Acid (Neutral) -0.010 a.u.

C -0.9503482771 -1.1530200248 0.001870543  
C -1.6820326153 0.0225432943 0.0000167307  
C -1.0395032928 1.2497623345 -0.0041999463  
C 0.3447831549 1.3032085266 -0.0066780163  
C 1.0597842659 0.1166196534 -0.0048244912  
C 0.4251100274 -1.1174666279 -0.0005856249  
O -3.0581948808 -0.0065852701 0.0026112385  
O -1.7887122909 2.3881372087 -0.0057754146  
C 2.5611222036 0.0810989278 -0.0072891934  
O 3.1097641851 1.2959074001 -0.0111915867  
O -1.7023831321 -2.3056236098 0.0062569466  
O 3.1791139499 -0.943227897 -0.0059798492  
H 1.0346634315 -2.0173833362 0.0007758103  
H 0.8572897394 2.2580250351 -0.009912935  
H -1.1209061579 -3.0712502025 0.0087227065  
H -3.316315679 -0.9350756557 0.0065188067  
H -2.7171739009 2.1368944299 -0.0025836918  
H 4.0755002691 1.2086608137 -0.0124580328

M11 Gallic Acid (Neutral) -0.002 a.u.

C -0.9490498741 -1.1660847954 0.0020873298



C -1.6808985363 0.0124140889 0.0002819103  
C -1.0349502793 1.2407956112 -0.0038761129  
C 0.3485176017 1.2905755445 -0.0063573969  
C 1.064342185 0.1035817738 -0.0045303407  
C 0.4285450862 -1.1311277384 -0.0003125772  
O -3.0416112076 0.0051356667 0.0026472236  
O -1.7682188905 2.3791089768 -0.005479247  
C 2.5530653392 0.0902125515 -0.0071668371  
O 3.0940791379 1.3189171751 -0.0119411381  
O -1.7022504182 -2.3084740643 0.0062501092  
O 3.2184174724 -0.9093996481 -0.0053863067  
H 1.028520585 -2.0362325396 0.0010116935  
H 0.8538184899 2.2482778357 -0.0096639565  
H -1.1406665585 -3.0877968643 0.0082210457  
H -3.3501898435 -0.908268959 0.0058952409  
H -2.7050093919 2.152675197 -0.0030718713  
H 4.0551001026 1.2169151879 -0.0133147688

M11 Gallic Acid (Neutral) -0.004 a.u.

C -0.9494153781 -1.1627775298 0.0020325701  
C -1.6810655585 0.0149504267 0.000219038  
C -1.0360226748 1.2429470845 -0.0039540758  
C 0.3476400147 1.2936310705 -0.0064377164  
C 1.062988243 0.1067526096 -0.0046079744  
C 0.4276542659 -1.1277332047 -0.0003849847  
O -3.045630517 0.0023506501 0.0026399183  
O -1.7730524289 2.3813564394 -0.005548117  
C 2.5549028726 0.0879347196 -0.0072005799  
O 3.0976572697 1.3131762877 -0.011759755  
O -1.7021917394 -2.3077586046 0.006248105  
O 3.2084115583 -0.9179536062 -0.0055156722  
H 1.0298910549 -2.0315850829 0.0009474869  
H 0.8547787426 2.2505658771 -0.0097252841  
H -1.1354432338 -3.0835691583 0.0083376996  
H -3.3415527116 -0.9150588814 0.0060672473  
H -2.7078227861 2.1488643024 -0.0029669451  
H 4.0598340065 1.2151316003 -0.0130969608

M11 Gallic Acid (Neutral) -0.006 a.u.

C -0.9497521233 -1.1594962592 0.0019756094  
C -1.6813112142 0.0174883282 0.0001500928  
C -1.0371444986 1.245167577 -0.004035036  
C 0.3467185749 1.2967630262 -0.0065153175  
C 1.0617762497 0.1099905161 -0.0046791526  
C 0.4267828949 -1.1243205485 -0.0004537305  
O -3.049735344 -0.0005487446 0.0026249627

O -1.7780892854 2.3836165871 -0.0056219483  
C 2.5568602363 0.0856557669 -0.0072221189  
O 3.1014845714 1.3074149763 -0.0115765016  
O -1.702197405 -2.3070397479 0.006244071  
O 3.1985143064 -0.9264535331 -0.0056592032  
H 1.0313759009 -2.026885245 0.000889139  
H 0.8556747947 2.2529584458 -0.0097820134  
H -1.1304242054 -3.0794036263 0.0084625207  
H -3.3330016711 -0.9218180836 0.0062336069  
H -2.7108016397 2.1449781699 -0.0028495391  
H 4.0648308576 1.2131573948 -0.0128914415

M11 Gallic Acid (Neutral) -0.008 a.u.

C -0.9500606939 -1.1562440864 0.0019216096  
C -1.6816333391 0.0200203366 0.0000827935  
C -1.0383016762 1.2474396498 -0.0041182783  
C 0.3457678613 1.299953127 -0.0065979118  
C 1.0607127236 0.113276659 -0.0047540404  
C 0.4259346113 -1.1209011266 -0.0005220651  
O -3.053919071 -0.0035335683 0.0026169866  
O -1.7832998153 2.3858812978 -0.0056989104  
C 2.5589232723 0.0833787884 -0.0072565799  
O 3.1055082122 1.3016679301 -0.0113814203  
O -1.7022642318 -2.3063248357 0.0062487456  
O 3.1887480065 -0.9348748021 -0.0058175989  
H 1.0329618484 -2.0221570356 0.0008301412  
H 0.8565131891 2.2554426346 -0.0098479674  
H -1.1255867424 -3.0752970844 0.0085907916  
H -3.3245703517 -0.9285006757 0.0063892983  
H -2.7139114911 2.1409985465 -0.0027219413  
H 4.0700386878 1.2109992452 -0.0126696524

M11 Caffeic Acid (Radical) -0.010 a.u.

C 1.2564168591 0.0559671504 -0.7594935767  
C 0.0010588293 -0.0835466392 -0.0117891299  
C -0.0356625718 -0.1402115555 1.3491489119  
C 1.1678431435 -0.061911833 2.0745680616  
C 2.4034263277 0.0777367435 1.3693174523  
C 2.4617866367 0.135760547 0.0171729072  
O -1.0885434824 -0.1505754249 -0.7839397484  
C 1.2328857128 -0.1175842743 3.512261738  
C 0.2039938436 -0.2397863943 4.3605032629  
C 0.5111566248 -0.2803019017 5.8280386076  
O -0.5970566945 -0.3775192056 6.55541432  
O 1.1902025463 0.0951002545 -2.0029704685  
O 1.6257345524 -0.229902136 6.259172724

H 2.2189959105 -0.0546555876 3.9708785482  
H -0.8370176057 -0.3115550291 4.0623323909  
H -0.3759541502 -0.3974343888 7.5003751027  
H -0.743599944 -0.08378715 -1.6929783976  
H 3.4014761076 0.2432597485 -0.5130881622  
H 3.3124748449 0.1385781801 1.960589089  
H -0.9879654906 -0.2451121039 1.8562593669

M11 Caffeic Acid (Radical) -0.002 a.u.

C 1.2509978383 0.0585607165 -0.7595918917  
C -0.0013826324 -0.084297938 0.0015713086  
C -0.0156102186 -0.1424782901 1.3678585513  
C 1.1937980411 -0.0636957369 2.0692378438  
C 2.4241078962 0.0756058312 1.3578292862  
C 2.4705452975 0.1360485873 0.0064963909  
O -1.098807298 -0.1515464865 -0.7388440533  
C 1.2596459509 -0.1179317474 3.5149233314  
C 0.2264173581 -0.2375227402 4.3526755757  
C 0.4928560427 -0.2751895057 5.8117329207  
O -0.6413448838 -0.3844644121 6.5210609296  
O 1.1728357217 0.1016336999 -1.9901267362  
O 1.5804836744 -0.2162064951 6.3150915015  
H 2.2476516632 -0.0537999107 3.968611092  
H -0.808060286 -0.3098379193 4.0367126386  
H -0.4106301793 -0.4036697731 7.4600377639  
H -0.7998772625 -0.0865282621 -1.6653531402  
H 3.4012561357 0.2427540281 -0.538975291  
H 3.3401121652 0.1342889421 1.9384269245  
H -0.9633430246 -0.2492035877 1.8823980537

M11 Caffeic Acid (Radical) -0.004 a.u.

C 1.2521178993 0.0573165113 -0.7594052474  
C -0.0006683069 -0.0837684243 -0.0012088047  
C -0.0199817078 -0.1411242262 1.3640073751  
C 1.1879395132 -0.0628542295 2.0701756797  
C 2.4193028366 0.0758860757 1.3602972993  
C 2.4684137163 0.1352692727 0.0087880453  
O -1.0964932768 -0.150652415 -0.7487386144  
C 1.253485836 -0.1171834384 3.5150385813  
C 0.2214270715 -0.2386932882 4.3537795057  
C 0.4969198942 -0.2763940486 5.8153578202  
O -0.631020094 -0.3840797659 6.5284292829  
O 1.1763412072 0.0994460064 -1.9929746834  
O 1.5910860159 -0.2178325933 6.3015742687  
H 2.2408122275 -0.0519765673 3.9700386859  
H -0.8144126049 -0.3124675721 4.0417717999

H -0.4033375331 -0.4029590401 7.4689964001  
H -0.7865758703 -0.0856279845 -1.6712942388  
H 3.4012165471 0.2417447937 -0.5332097334  
H 3.3337506513 0.1350305149 1.9432348346  
H -0.9686720224 -0.2465605811 1.8771147437

M11 Caffeic Acid (Radical) -0.006 a.u.

C 1.2531318547 0.0581067707 -0.7593388732  
C 0.0000036202 -0.084597002 -0.0042868846  
C -0.0243747382 -0.1428967521 1.3596537767  
C 1.1820569578 -0.063712766 2.0713524376  
C 2.4144414374 0.0769986988 1.3628994324  
C 2.4661168804 0.1372373178 0.0112323091  
O -1.0940036058 -0.1523278798 -0.7593223301  
C 1.247552616 -0.1193156253 3.5145962482  
C 0.2162029251 -0.2381459459 4.3554917185  
C 0.5012803562 -0.277955165 5.8193965164  
O -0.6210344765 -0.3779001766 6.5365345557  
O 1.1799743757 0.0998583139 -1.9960328798  
O 1.6023365686 -0.2263552229 6.2880053419  
H 2.234649885 -0.0575596662 3.9706930483  
H -0.8214649814 -0.3077248315 4.0475242611  
H -0.3962287341 -0.3981302984 7.4786308299  
H -0.7731754933 -0.085541105 -1.6776549084  
H 3.4008705207 0.2454509765 -0.5271506582  
H 3.3271787155 0.1370793584 1.948439241  
H -0.973862684 -0.2500499994 1.8711098173

M11 Caffeic Acid (Radical) -0.008 a.u.

C 1.2546540173 0.0569587134 -0.7593677265  
C 0.0005240689 -0.0840293542 -0.007780982  
C -0.029768092 -0.1414305021 1.3547428092  
C 1.1752313489 -0.0627200213 2.072835841  
C 2.4091215669 0.0773858759 1.3659179994  
C 2.463996616 0.1364387787 0.0140378811  
O -1.0914071596 -0.1513787106 -0.7710427039  
C 1.2405156419 -0.1183525744 3.5136999704  
C 0.2103950657 -0.2391320972 4.357658678  
C 0.5060177403 -0.279203784 5.8235403886  
O -0.6094766006 -0.3777118081 6.5454635625  
O 1.184745321 0.0973294169 -1.9993602342  
O 1.6137780642 -0.2281810987 6.2738407607  
H 2.2270689001 -0.0557480536 3.9710694444  
H -0.828857257 -0.3100940853 4.0543364133  
H -0.3867915766 -0.3977119623 7.489022826  
H -0.7587563064 -0.0846624214 -1.6848863238

H 3.4011358156 0.2442412495 -0.5204334863  
H 3.320070292 0.1378575626 1.9542279156  
H -0.9805454667 -0.2473361238 1.8642499665

M11 Gallic Acid (Radical) -0.010 a.u.

C -0.9441688992 -1.2066983609 0.0031086156  
C -1.7449514041 0.0035269704 0.0014080515  
C -1.0144237789 1.2712029932 -0.0034547466  
C 0.3551717842 1.3299310717 -0.0064451804  
C 1.0538257014 0.1253767828 -0.0047458428  
C 0.4170567514 -1.1255397259 -0.0000654132  
O -2.9865871028 0.031861328 0.003976016  
O -1.7984594027 2.349586401 -0.0047129623  
C 2.5589424352 0.0834041388 -0.0079581019  
O 3.1075614557 1.2951310246 -0.0119172312  
O -1.6338418855 -2.362811399 0.0078473734  
O 3.1639020427 -0.9477694931 -0.0068224229  
H 1.0497039142 -2.0099405834 0.0010333158  
H 0.8824683357 2.2760599452 -0.0100183281  
H -1.0185408776 -3.1038095896 0.0093209918  
H -2.7070088041 1.9993093592 -0.0017297057  
H 4.0744417342 1.2143021371 -0.013529429

M11 Gallic Acid (Radical) -0.002 a.u.

C -0.942459488 -1.216703116 0.0031358448  
C -1.7436935977 -0.0006723017 0.0015652857  
C -1.0128326471 1.26845876 -0.0034003362  
C 0.3588184913 1.3196284633 -0.006374626  
C 1.0556324312 0.1143738142 -0.004578148  
C 0.4214980432 -1.1377398641 0.0000634184  
O -2.9756462641 0.0241597405 0.0040739839  
O -1.7793343605 2.3500943683 -0.0047169307  
C 2.5491380566 0.0916179827 -0.007651625  
O 3.0940301785 1.3151973871 -0.0125268547  
O -1.6408010151 -2.3584387992 0.0076410306  
O 3.1989575935 -0.9167794703 -0.0059756293  
H 1.0454636871 -2.0268734606 0.0011762549  
H 0.8813921016 2.2674221147 -0.0100136366  
H -1.0501402316 -3.1183872314 0.0087945762  
H -2.7006951129 2.0318011838 -0.0017836879  
H 4.0557641342 1.2159634286 -0.0141339199

M11 Gallic Acid (Radical) -0.004 a.u.

C -0.9429409086 -1.2141078136 0.0031231693  
C -1.7438847284 0.000442885 0.0015184462  
C -1.0131545739 1.2690767772 -0.0034149197

C 0.3580011608 1.3220890847 -0.0063906578  
C 1.0549341628 0.1170465955 -0.0046172493  
C 0.4203517025 -1.134625083 0.0000288004  
O -2.9781902747 0.0262806527 0.0040438363  
O -1.7839343752 2.3499403099 -0.0047150057  
C 2.5514323399 0.0895159349 -0.0077085973  
O 3.0971004618 1.3100993584 -0.0123796976  
O -1.638953147 -2.3595249435 0.0076842855  
O 3.1899895189 -0.9246453006 -0.006179911  
H 1.0463693355 -2.0226143175 0.0011431998  
H 0.8817922963 2.2694137256 -0.0100078869  
H -1.0418072527 -3.1145752777 0.008930749  
H -2.702121211 2.0235438774 -0.0017629534  
H 4.0601074929 1.2157665346 -0.0140006079

M11 Gallic Acid (Radical) -0.006 a.u.

C -0.9433921339 -1.2115997492 0.003117587  
C -1.7441500435 0.0015199857 0.0014849964  
C -1.0135041757 1.2697223205 -0.0034321196  
C 0.3571595439 1.3245923972 -0.0064228606  
C 1.0544549748 0.1197203137 -0.0046749805  
C 0.4192399512 -1.1316086422 -0.000011047  
O -2.9808815267 0.0282672538 0.0040260326  
O -1.7885539545 2.3498538723 -0.0047120938  
C 2.5537857989 0.0874548929 -0.007809821  
O 3.1002386354 1.3051925674 -0.0122244756  
O -1.6371999673 -2.3606336914 0.0077415268  
O 3.1812344229 -0.9324007075 -0.0063658956  
H 1.047342665 -2.0184614565 0.0010988178  
H 0.8821378832 2.271490013 -0.0100300156  
H -1.0337855973 -3.1108940812 0.0090623115  
H -2.7035474567 2.0154409602 -0.0017351855  
H 4.0645129803 1.2154667512 -0.0138177773

M11 Gallic Acid (Radical) -0.008 a.u.

C -0.9437962564 -1.2091302836 0.0031125236  
C -1.744512167 0.0025457881 0.0014468742  
C -1.0139302637 1.2704432801 -0.0034443552  
C 0.3562059055 1.327217381 -0.0064368331  
C 1.0540686377 0.1225110333 -0.0047133228  
C 0.4181367465 -1.1285678343 -0.0000404491  
O -2.983667405 0.0301274756 0.0039998146  
O -1.7934235767 2.3497214081 -0.0047120528  
C 2.5562956273 0.0854175912 -0.007886201  
O 3.1037677012 1.3001655431 -0.0120682937  
O -1.6354935379 -2.361722513 0.0077943851

O 3.1725252306 -0.9401094138 -0.0065916172  
H 1.048462942 -2.0142138931 0.0010643764  
H 0.8823581612 2.2737115578 -0.0100275683  
H -1.0260377552 -3.1073037952 0.0091944614  
H -2.705203675 2.0073394922 -0.0017280427  
H 4.0693356848 1.2149701825 -0.0136686995

M11 Caffeic Acid (Neutral) Zero field

C 1.2632740544 0.0410143927 -0.7044339864  
C 0.0463178566 -0.056161931 -0.0218923586  
C 0.0382086423 -0.0916849331 1.3535949183  
C 1.2348261896 -0.0310220437 2.0712491972  
C 2.4343181656 0.0713814899 1.3784128692  
C 2.4513577821 0.105516333 -0.0084786525  
O -1.1121061312 -0.1130383546 -0.7176840714  
C 1.2703242647 -0.0755660728 3.5341954061  
C 0.2403993677 -0.2594811755 4.354296272  
C 0.479093666 -0.2738263549 5.8109781158  
O -0.660223794 -0.4746406842 6.5046411629  
O 1.1613551444 0.0696457938 -2.0649827654  
O 1.540898634 -0.1289454414 6.3567060289  
H 2.2474287872 0.0496301506 4.0000762829  
H -0.780598486 -0.4057842613 4.0213645961  
H -0.4311721943 -0.4716611023 7.4431104431  
H 2.0247193926 0.1270226715 -2.4810687554  
H -0.9200596784 -0.0732917744 -1.661569162  
H 3.3903044397 0.1844055558 -0.549370905  
H 3.3671317814 0.1230662591 1.9305364556  
H -0.9206868842 -0.1629065171 1.8549029085

M11 Caffeic Acid (Neutral) 0.010 a.u.

C 1.2716846292 0.0508083105 -0.704709796  
C 0.0502748928 -0.0695218147 -0.0087354534  
C 0.0532919862 -0.1170438993 1.362699442  
C 1.2581815904 -0.0449199304 2.0775766537  
C 2.4545989094 0.0770664496 1.3748589804  
C 2.4657684369 0.1238903997 -0.0106382655  
O -1.1034125917 -0.1370733709 -0.6875912606  
C 1.2974085384 -0.0972670225 3.5231065001  
C 0.2543697576 -0.2366591765 4.3586127682  
C 0.4619492547 -0.2728035008 5.7939213522  
O -0.7109743815 -0.4285773683 6.4829839648  
O 1.1392280616 0.0851342561 -2.0372836492  
O 1.5001001263 -0.1850578484 6.4143327813  
H 2.283380046 -0.0165106538 3.9817758597  
H -0.7673143832 -0.3323733019 4.0129058134

H -0.4538510642 -0.4460702872 7.4109331507  
H 1.9676284041 0.1578671632 -2.5237678444  
H -0.9435200646 -0.0975042082 -1.640817939  
H 3.398569255 0.2172609554 -0.5578774496  
H 3.3920635185 0.1343856441 1.9198724854  
H -0.9043139218 -0.2113587956 1.8624259058

M11 Caffeic Acid (Neutral) 0.002 a.u.

C 1.2645955174 0.0440760006 -0.7041400332  
C 0.0477593474 -0.0600589189 -0.0182144264  
C 0.0430340191 -0.0994412018 1.3564783553  
C 1.241548496 -0.0354273379 2.072186482  
C 2.4394701595 0.0729805656 1.3773235055  
C 2.4540022798 0.1110883196 -0.0096832847  
O -1.1104482251 -0.1201878451 -0.7093077003  
C 1.2776700659 -0.0828217433 3.5327885227  
C 0.2440434986 -0.253579621 4.3541277464  
C 0.4748526108 -0.273809912 5.8074287481  
O -0.672799268 -0.4609389294 6.4980777415  
O 1.1548707812 0.0750829115 -2.0592155963  
O 1.5321445817 -0.1448820906 6.3690022085  
H 2.2569854375 0.0293189155 3.997575569  
H -0.7776583612 -0.3848295716 4.0179068926  
H -0.4401901054 -0.4625605506 7.4349942022  
H 2.0112751876 0.1354291011 -2.4901484255  
H -0.9256199557 -0.079447392 -1.6552056812  
H 3.391175354 0.1946580469 -0.552443864  
H 3.3736343471 0.1264455402 1.9271958216  
H -0.9152347683 -0.1774222868 1.8578572162

M11 Caffeic Acid (Neutral) 0.004 a.u.

C 1.2660514727 0.0468206379 -0.703988993  
C 0.0489454164 -0.0635037933 -0.0150613727  
C 0.0470534293 -0.1062840588 1.3588650383  
C 1.2472896249 -0.0393556228 2.0732619115  
C 2.4440836056 0.0743110051 1.3764504513  
C 2.456715115 0.1159993537 -0.0104712132  
O -1.1087048585 -0.1264684358 -0.702048631  
C 1.28407443 -0.0889792945 3.531025034  
C 0.2472884326 -0.2481706783 4.3544269133  
C 0.4709997181 -0.2736643118 5.8039518987  
O -0.6841482867 -0.4487628093 6.4925624343  
O 1.1493342063 0.0799999191 -2.0535407392  
O 1.5236567796 -0.1589987992 6.3807900682  
H 2.265358709 0.0117623486 3.9945542058  
H -0.7747907814 -0.3662926999 4.0152058778



H -0.4470489796 -0.4548828615 7.4276868939  
H 1.9987657013 0.1427324041 -2.4989537539  
H -0.9307308967 -0.0851972746 -1.6498777858  
H 3.3923325998 0.203674799 -0.5548188145  
H 3.3793595777 0.1292705895 1.9245311944  
H -0.9107740155 -0.1903384171 1.8600333815

M11 Caffeic Acid (Neutral) 0.006 a.u.

C 1.2677479222 0.0488432631 -0.7039929573  
C 0.0497824454 -0.0663754251 -0.0123803204  
C 0.0501174701 -0.1116848391 1.3607042361  
C 1.2520289261 -0.0423649142 2.0745013161  
C 2.4481180691 0.0753643994 1.3758077322  
C 2.4595398926 0.1197623544 -0.0109205098  
O -1.1068875223 -0.1315392951 -0.6960404779  
C 1.2894600324 -0.0935035694 3.5288476772  
C 0.2500920505 -0.243452305 4.3552172715  
C 0.4675861924 -0.2734050993 5.8005213114  
O -0.6942494821 -0.4389951025 6.4881311163  
O 1.1447727543 0.0832615276 -2.0479880469  
O 1.5154562912 -0.1706056335 6.3921903931  
H 2.2724693994 -0.0019060676 3.9909697318  
H -0.7720927503 -0.3511194237 4.0134769414  
H -0.4516484835 -0.4493507058 7.4211985606  
H 1.9871293559 0.1496248351 -2.5075064079  
H -0.9352283889 -0.0902256801 -1.6457106854  
H 3.3939435449 0.2104612945 -0.5564622766  
H 3.3843546644 0.1314804881 1.922406126  
H -0.9073813841 -0.2005981018 1.8616132683

M11 Caffeic Acid (Neutral) 0.008 a.u.

C 1.2696365122 0.0499899341 -0.7042354348  
C 0.0502360742 -0.0682225726 -0.0102760557  
C 0.0521782414 -0.1148961422 1.3620024418  
C 1.2556294251 -0.0439760459 2.0759393185  
C 2.4516091609 0.0762520615 1.3753006334  
C 2.4625590461 0.1221197608 -0.0109725468  
O -1.1051299523 -0.1348106255 -0.6912099431  
C 1.2938437622 -0.0959252522 3.5262425595  
C 0.2524726502 -0.2397753588 4.3565802445  
C 0.464579456 -0.2731151768 5.7971799949  
O -0.7030587327 -0.432909674 6.4849008791  
O 1.1414335087 0.0845570343 -2.0425900347  
O 1.5075160458 -0.1786698881 6.4033485437  
H 2.2783444307 -0.0105174904 3.9867750683  
H -0.769490232 -0.3405385809 4.0126436762

H -0.4538489369 -0.4469004556 7.4156061932  
H 1.9767444599 0.1545901912 -2.5157821568  
H -0.9394755252 -0.0941997686 -1.6426795993  
H 3.3960417252 0.2144561858 -0.5574875005  
H 3.3885727464 0.1330866027 1.9208871109  
H -0.9052828658 -0.2069227388 1.8624106076

M11 Gallic Acid (Neutral) Zero field

C -0.9486421438 -1.1694168966 0.0021405185  
C -1.6808074711 0.0098825663 0.0003408381  
C -1.0339193982 1.238715384 -0.0038039757  
C 0.3493518979 1.2875983319 -0.0062825229  
C 1.0658559072 0.1004807511 -0.0044557147  
C 0.4294564252 -1.1345040171 -0.0002412758  
O -3.0376642359 0.0077879243 0.0026539578  
O -1.763571101 2.3768897959 -0.0054168822  
C 2.5513152529 0.0924936927 -0.0071371394  
O 3.090730742 1.3246612483 -0.0121087162  
O -1.7023738324 -2.3091816821 0.006255403  
O 3.2285092083 -0.9007956457 -0.0052719211  
H 1.0272556161 -2.0408338857 0.0010755358  
H 0.8527888314 2.2461002267 -0.0096093561  
H -1.1461037978 -3.0920861886 0.0081085331  
H -3.3588741127 -0.901482647 0.0057314131  
H -2.7023476245 2.1564348104 -0.0031654043  
H 4.0506008363 1.218481231 -0.013519291

M11 Gallic Acid (Neutral) 0.010 a.u.

C -0.9456682203 -1.1866719216 0.0023659696  
C -1.6814108677 -0.0025978696 0.0005670175  
C -1.0293753719 1.2299090871 -0.0035369328  
C 0.352694287 1.2742339649 -0.0059977108  
C 1.0761021992 0.0862775379 -0.0041398005  
C 0.4343554131 -1.1510483671 0.0000768057  
O -3.0185591747 0.018393581 0.002670675  
O -1.7433191036 2.366448529 -0.0051967385  
C 2.543747493 0.103831128 -0.0070090227  
O 3.0776606634 1.3535166422 -0.0127109237  
O -1.703974453 -2.3123223416 0.0063094976  
O 3.2797661908 -0.8577290166 -0.0049366885  
H 1.0225652037 -2.063052017 0.0013755591  
H 0.8466030181 2.2371287824 -0.0094333728  
H -1.1774869113 -3.1146706121 0.0076317152  
H -3.4022398771 -0.8685348654 0.0050969902  
H -2.69158794 2.1749772426 -0.0034905227  
H 4.0316884511 1.2231355159 -0.0143485168

M11 Gallic Acid (Neutral) 0.002 a.u.

C -0.9481831165 -1.1727725195 0.0021910238  
C -1.6807863369 0.0073615884 0.0003948915  
C -1.0329312889 1.2367169435 -0.0037390432  
C 0.3501359853 1.284712608 -0.0062147221  
C 1.0675323775 0.0974626431 -0.0043859142  
C 0.4303879612 -1.1378566649 -0.0001728156  
O -3.0337859239 0.0102895005 0.0026598589  
O -1.7591190006 2.3747100419 -0.0053621549  
C 2.5496503298 0.0947750325 -0.0071117669  
O 3.0876244097 1.3303946463 -0.0122578868  
O -1.702562534 -2.3098774084 0.0062637382  
O 3.2386569255 -0.8921692882 -0.0051751827  
H 1.0261047285 -2.0453769935 0.0011374348  
H 0.851687866 2.2440436485 -0.0095627946  
H -1.1517660184 -3.0964367529 0.0080021186  
H -3.367581041 -0.894732901 0.0055813855  
H -2.6998491638 2.160154511 -0.0032476409  
H 4.0463448406 1.2198263647 -0.0137065296

M11 Gallic Acid (Neutral) 0.004 a.u.

C -0.9476682718 -1.1761631842 0.0022381788  
C -1.6808311029 0.0048519794 0.0004438869  
C -1.0319859068 1.2348193586 -0.0036804503  
C 0.3508667739 1.2819294916 -0.0061529849  
C 1.069373239 0.094533092 -0.0043200687  
C 0.4313429992 -1.1411851884 -0.0001072857  
O -3.0299589576 0.0126259881 0.0026639742  
O -1.7548706038 2.3725690751 -0.0053132609  
C 2.5480803384 0.0970476656 -0.0070872644  
O 3.0847630273 1.3361109622 -0.0123933927  
O -1.7028141161 -2.3105536068 0.0062726711  
O 3.248847494 -0.8835474804 -0.0050906503  
H 1.0250736848 -2.0498590768 0.0011975282  
H 0.8505238029 2.2421129581 -0.0095224682  
H -1.1576870727 -3.1008604202 0.0079025455  
H -3.3763031404 -0.8880330061 0.0054434177  
H -2.6975246368 2.1638454099 -0.003318387  
H 4.0423334491 1.2209809823 -0.0138819893

M11 Gallic Acid (Neutral) 0.006 a.u.

C -0.9470882909 -1.179608342 0.0022826887  
C -1.6809436595 0.0023511282 0.0004888979  
C -1.0310745745 1.233043597 -0.0036269005  
C 0.3515461372 1.279251984 -0.0060965888

C 1.0713988771 0.0916880726 -0.0042576164  
C 0.4323259926 -1.1444929514 -0.0000442542  
O -3.0261510943 0.0147775784 0.0026674035  
O -1.750815652 2.3704670991 -0.0052680224  
C 2.5465887983 0.0993083562 -0.0070626947  
O 3.0821291198 1.3418517907 -0.0125189813  
O -1.703126123 -2.3111985494 0.006282111  
O 3.2590895626 -0.8749326015 -0.005014944  
H 1.0241481041 -2.0542963461 0.0012568299  
H 0.8493035238 2.2403097683 -0.009487935  
H -1.1639211132 -3.1053782285 0.0078080107  
H -3.3850226256 -0.8813967115 0.0053139919  
H -2.6953672554 2.1675295098 -0.0033794093  
H 4.0385412731 1.2219498461 -0.014048587

M11 Gallic Acid (Neutral) 0.008 a.u.

C -0.9464265072 -1.1831135315 0.0023254723  
C -1.6811328934 -0.0001344079 0.0005300549  
C -1.0301961202 1.2314034051 -0.003578172  
C 0.3521657711 1.2766808207 -0.0060437742  
C 1.0736380117 0.0889276778 -0.0041962142  
C 0.4333330314 -1.1477844805 0.0000180815  
O -3.0223448678 0.0167138151 0.0026693555  
O -1.7469501534 2.3684202777 -0.0052278166  
C 2.5451445774 0.1015638192 -0.007034513  
O 3.0797258257 1.3476616829 -0.0126303971  
O -1.7035106944 -2.3117904837 0.0062935734  
O 3.2693921713 -0.8663243976 -0.0049584024  
H 1.0233109408 -2.0587013133 0.0013177333  
H 0.8480128936 2.238640134 -0.0094570405  
H -1.1705145688 -3.1099840047 0.0077161787  
H -3.3936745804 -0.8748750255 0.0051944006  
H -2.6933717641 2.1712282797 -0.0034357913  
H 4.0349599267 1.2226927325 -0.0142087288

M11 Caffeic Acid (Radical) Zero field

C 1.2504963914 0.0569081257 -0.7599374273  
C -0.0023176933 -0.0827298424 0.0039166702  
C -0.0124440723 -0.139032974 1.3712036443  
C 1.1985123444 -0.0618013379 2.0686169469  
C 2.4285011847 0.0743044457 1.3557188085  
C 2.4730599455 0.1327869575 0.0045653138  
O -1.1011024953 -0.1485524431 -0.7300489951  
C 1.2645428508 -0.1142869804 3.514412599  
C 0.2308961601 -0.2384702226 4.3520062612  
C 0.4891737881 -0.2734584882 5.8081925625

O -0.6498213167 -0.3941579607 6.5145084437  
O 1.1706708231 0.0993032019 -1.9875929087  
O 1.5697654852 -0.2043164028 6.3283211459  
H 2.252810534 -0.0450558993 3.9668525671  
H -0.8017575677 -0.3172389499 4.032615399  
H -0.4153266332 -0.4111177662 7.4518511878  
H -0.8122371657 -0.0862449235 -1.6603440599  
H 3.4021623549 0.2365989541 -0.5442070306  
H 3.3459280429 0.131748574 1.9342460296  
H -0.959860961 -0.2426670677 1.886875842

M11 Caffeic Acid (Radical) 0.010 a.u.

C 1.2531012413 0.0576331094 -0.7641767447  
C -0.0089464351 -0.0821053067 0.0092017931  
C -0.0070204919 -0.1366771215 1.37952789  
C 1.2098631635 -0.0602909699 2.069040251  
C 2.4443924684 0.0730014614 1.3485159836  
C 2.4876258798 0.1304834016 0.0013649465  
O -1.1059760137 -0.1467861463 -0.7034320307  
C 1.2791466221 -0.1096620964 3.5033364027  
C 0.2429799527 -0.236920781 4.356917569  
C 0.4759439264 -0.2692593858 5.7913311848  
O -0.6834770279 -0.4061420264 6.5011828294  
O 1.1702156328 0.1019709233 -1.9765558175  
O 1.5298149015 -0.1907561033 6.3829222626  
H 2.2719078115 -0.0363946352 3.9463516845  
H -0.7853525773 -0.3221647782 4.0286442079  
H -0.4129130104 -0.4215873201 7.4256028017  
H -0.8616970143 -0.0905239534 -1.6498676326  
H 3.4112155683 0.2302632583 -0.5582257574  
H 3.364761488 0.1273479014 1.9234577752  
H -0.9539340858 -0.2389104313 1.8966334007

M11 Caffeic Acid (Radical) 0.002 a.u.

C 1.2501882757 0.0569226942 -0.7603222516  
C -0.0033174562 -0.0824155989 0.0058677388  
C -0.0097379034 -0.1383288437 1.3739483575  
C 1.2026286733 -0.0614008844 2.0681882571  
C 2.432458193 0.0738296947 1.3539411164  
C 2.4754882584 0.1320341538 0.0031218505  
O -1.1028742639 -0.1479130546 -0.7224000555  
C 1.268959872 -0.1132035662 3.5133184473  
C 0.2346514076 -0.238275265 4.3518138032  
C 0.4858722036 -0.2723823148 5.8046950589  
O -0.6579626796 -0.3976053305 6.5091895496  
O 1.1690030818 0.0995781044 -1.985061357

O 1.5602639991 -0.199966225 6.3404146745  
H 2.2578658256 -0.0426645942 3.9643093157  
H -0.7967406568 -0.3188126076 4.0296072834  
H -0.4186615185 -0.4139074044 7.4446082396  
H -0.8237772171 -0.0869203338 -1.6562207354  
H 3.4030357242 0.2348410904 -0.5485151884  
H 3.3510442544 0.1305769222 1.9308000214  
H -0.9567360732 -0.2414676367 1.890468874

M11 Caffeic Acid (Radical) 0.004 a.u.

C 1.2502801917 0.0566791599 -0.7608074014  
C -0.0044137641 -0.0821651849 0.0073535717  
C -0.0078108239 -0.1376776115 1.3761037859  
C 1.2058896204 -0.0610964528 2.0680231676  
C 2.4360120705 0.0734314807 1.3524461538  
C 2.4780626176 0.1313947509 0.0020903167  
O -1.1043220992 -0.1473773969 -0.7159333614  
C 1.2726221524 -0.1122644024 3.5116856319  
C 0.2377346424 -0.2380527115 4.3521665853  
C 0.482922947 -0.2715119749 5.8012716907  
O -0.6653103174 -0.4004780187 6.5051261784  
O 1.1681315032 0.1003708791 -1.9826823717  
O 1.5515431326 -0.1964768115 6.3518095653  
H 2.262283633 -0.0407188234 3.9610609482  
H -0.7925871991 -0.3200638124 4.027644414  
H -0.4201153918 -0.4162026424 7.4383617763  
H -0.8344872005 -0.0879663714 -1.6531116138  
H 3.4042717332 0.2334556979 -0.5520337013  
H 3.3555140091 0.1296019354 1.928031893  
H -0.9545694573 -0.2403626892 1.8931657709

M11 Caffeic Acid (Radical) 0.006 a.u.

C 1.250796541 0.0566628642 -0.7615918932  
C -0.0057166742 -0.0820101533 0.0083777383  
C -0.0067229223 -0.1371432983 1.377704015  
C 1.2081821008 -0.0607887011 2.06808595  
C 2.439143869 0.0731789596 1.351137627  
C 2.4808945991 0.1309258138 0.0014932457  
O -1.1053553676 -0.1470102775 -0.7106619922  
C 1.2754710247 -0.1113651145 3.5095024023  
C 0.2401210183 -0.2377474523 4.3531057922  
C 0.4803634906 -0.2707212442 5.7979513084  
O -0.6718791856 -0.4028381748 6.502393675  
O 1.1681141667 0.1010098507 -1.9804965063  
O 1.5436694788 -0.1938744238 6.3625599146  
H 2.2660350659 -0.0390428717 3.9570071555

H -0.7893573705 -0.3210080217 4.0268825828  
H -0.4196524368 -0.4182387171 7.4331365235  
H -0.8443003483 -0.0889818802 -1.6510091688  
H 3.4059990649 0.232246003 -0.5547816289  
H 3.3592544719 0.1287765818 1.9259658681  
H -0.9534085863 -0.2395107426 1.895010391

M11 Caffeic Acid (Radical) 0.008 a.u.

C 1.2517560861 0.0566394178 -0.7626914743  
C -0.0072126174 -0.0819672299 0.0089377427  
C -0.0064641752 -0.1367537381 1.37879179  
C 1.2095121612 -0.0605740935 2.0684021792  
C 2.4419127603 0.0730099645 1.3499117728  
C 2.4840369887 0.130604507 0.0012760079  
O -1.1059553003 -0.146800316 -0.706542089  
C 1.2775857556 -0.1105597519 3.5067542415  
C 0.2418369169 -0.2373369653 4.3546983173  
C 0.4780875314 -0.2699873824 5.7946976066  
O -0.6778490968 -0.4046676958 6.5010637748  
O 1.1688734838 0.1019190059 -1.9784946552  
O 1.5365544894 -0.1920598612 6.3728160733  
H 2.2691972408 -0.0377441249 3.952129413  
H -0.7870057789 -0.3215758137 4.0272870544  
H -0.4172501815 -0.4199950295 7.4289112909  
H -0.8533116753 -0.0901246935 -1.649941657  
H 3.4082564783 0.2313316733 -0.5568097518  
H 3.3623189805 0.1280774155 1.924503935  
H -0.9532280478 -0.2389162883 1.8960714279

M11 Gallic Acid (Radical) Zero field

C -0.9419255895 -1.2193766542 0.0031520242  
C -1.7435944466 -0.0018274237 0.0016139803  
C -1.0125510433 1.267920108 -0.0033840157  
C 0.3595739714 1.3172664965 -0.0063539581  
C 1.0564911185 0.1117696441 -0.0045352738  
C 0.4226623401 -1.1408935907 0.0001022186  
O -2.9732079125 0.0219155213 0.0041023775  
O -1.7748847223 2.350258852 -0.0047201244  
C 2.5469404592 0.0937457309 -0.0075987254  
O 3.0911844414 1.3203284067 -0.0126653809  
O -1.6427151481 -2.3573549454 0.0076023245  
O 3.2080257419 -0.9088587509 -0.0057940509  
H 1.0446751726 -2.0311308775 0.0012111149  
H 0.88092535 2.2655528728 -0.0100156128  
H -1.0587714324 -3.1223074304 0.0086601577  
H -2.6993856819 2.0400985748 -0.0018163216

H 4.0516493815 1.2160164657 -0.014265734

M11 Gallic Acid (Radical) 0.010 a.u.

C -0.9378546067 -1.2343302388 0.0032041541  
C -1.7444511265 -0.0081400482 0.0016257097  
C -1.0114337 1.2669298994 -0.0032843247  
C 0.3624889591 1.3074430253 -0.0061678876  
C 1.0636492117 0.1001913875 -0.0043259813  
C 0.4287587439 -1.1572723897 0.0002941961  
O -2.9620300693 0.0088933663 0.0044690394  
O -1.7553028331 2.3511876191 -0.0047090698  
C 2.5365928538 0.10488435 -0.0073862736  
O 3.0805071094 1.3470750525 -0.0131698179  
O -1.6531022027 -2.351872252 0.007496914  
O 3.2541464671 -0.8687883925 -0.0052729497  
H 1.0427805783 -2.0522118596 0.0014014107  
H 0.8778277123 2.2584625225 -0.0098827682  
H -1.1069852489 -3.1436663106 0.0081301654  
H -2.6947783154 2.0812653603 -0.0022623467  
H 4.0342784668 1.2130719084 -0.0148651697

M11 Gallic Acid (Radical) 0.002 a.u.

C -0.9412680714 -1.2222985116 0.0031648163  
C -1.7435705373 -0.0029616341 0.0016521595  
C -1.0122183976 1.2675814436 -0.0034207783  
C 0.3605290647 1.3148135423 -0.0065446255  
C 1.0575887031 0.1089612752 -0.0047931877  
C 0.4240044957 -1.1443677372 -0.00003415  
O -2.97067608 0.0196648393 0.0044794069  
O -1.7704890418 2.3502933737 -0.0047028831  
C 2.5450491651 0.0957359185 -0.0080607185  
O 3.0878561419 1.3257162552 -0.0125528343  
O -1.6446792241 -2.3561315934 0.0077257578  
O 3.2172157918 -0.9010980485 -0.0055023847  
H 1.0442116339 -2.0356536709 0.001027388  
H 0.880838662 2.2635315008 -0.0102971004  
H -1.068114638 -3.1264258305 0.0086696902  
H -2.6982235322 2.0489646723 -0.0017858701  
H 4.0470378643 1.2167972052 -0.0137296861

M11 Gallic Acid (Radical) 0.004 a.u.

C -0.9406682028 -1.2249948145 0.0031867025  
C -1.7436525044 -0.0042276635 0.0016940184  
C -1.0120903978 1.2671183682 -0.0033530034  
C 0.3609500003 1.3128650976 -0.0063186358  
C 1.0587885114 0.1067557554 -0.004472127



C 0.4250760663 -1.1473676956 0.0001703015  
O -2.9686833214 0.0171708203 0.0042040162  
O -1.7664986655 2.3506363562 -0.0047247483  
C 2.5428020393 0.0980519138 -0.0075505204  
O 3.0860924078 1.3307925894 -0.0128891801  
O -1.6467152081 -2.3552291093 0.0075549793  
O 3.2264131082 -0.8929903864 -0.0054856933  
H 1.0434676439 -2.0397001066 0.0012662414  
H 0.8798417183 2.2622141119 -0.010028487  
H -1.0768631753 -3.1304545706 0.008422503  
H -2.6971771214 2.0568001359 -0.0019203059  
H 4.0440091013 1.2156821978 -0.0144610612

M11 Gallic Acid (Radical) 0.006 a.u.

C -0.9398984822 -1.2279628721 0.003210573  
C -1.7438405459 -0.0054809357 0.001747433  
C -1.0119051606 1.2669144558 -0.0033386307  
C 0.3615281063 1.31089496 -0.0063096254  
C 1.0602082521 0.1044282411 -0.0044510008  
C 0.4263028893 -1.150635149 0.0002024443  
O -2.9665458322 0.0145911068 0.0042547618  
O -1.762611517 2.3508435306 -0.0047274422  
C 2.5407972432 0.1002666018 -0.0075571756  
O 3.0840047704 1.3360923071 -0.0129717057  
O -1.6487887522 -2.3541659783 0.0075434615  
O 3.2356556683 -0.8850128186 -0.0053585398  
H 1.0430665633 -2.0439265851 0.0012852117  
H 0.8791913204 2.2608051033 -0.0100520732  
H -1.0864134853 -3.1347187897 0.0083116571  
H -2.6962807394 2.0650521 -0.0019695525  
H 4.0406217016 1.2151377219 -0.0145247966

M11 Gallic Acid (Radical) 0.008 a.u.

C -0.9390179892 -1.2310450841 0.0032372618  
C -1.7441151821 -0.006766817 0.001808292  
C -1.0117296254 1.2668478974 -0.0033285532  
C 0.3620489735 1.3091045443 -0.0063142554  
C 1.0618306017 0.1022299948 -0.0044438963  
C 0.427544398 -1.1539347044 0.0002285506  
O -2.9644771945 0.0118822322 0.0043198704  
O -1.7589161241 2.3510600327 -0.0047323038  
C 2.5388183983 0.1025221258 -0.007596413  
O 3.0821906441 1.3414748633 -0.0130227133  
O -1.6509019074 -2.353100472 0.0075430972  
O 3.2449087754 -0.8770429607 -0.0052502335  
H 1.0427940125 -2.0481274056 0.0012936494

H 0.8784822873 2.2595957425 -0.0100969647  
H -1.0963366146 -3.1391200728 0.008211156  
H -2.6955028782 2.0731967862 -0.0020146756  
H 4.0374714247 1.2143462974 -0.0145468686

ωB97 Caffeic Acid (Neutral) -0.010 a.u.

C 1.2564615631 0.0694163564 -0.7170775022  
C 0.0468198623 -0.15180399 -0.0602067395  
C 0.0228508904 -0.2564820956 1.3191520576  
C 1.2029395506 -0.1404676114 2.0623111654  
C 2.4045511714 0.0700869436 1.384395648  
C 2.4327304936 0.1778064663 -0.0001488442  
O -1.1118308848 -0.2679359294 -0.7832590064  
C 1.2413263015 -0.226977622 3.533418505  
C 0.2143052309 -0.1821370768 4.3757237677  
C 0.5018227576 -0.2671766666 5.8435391502  
O -0.6200395652 -0.1847823455 6.5665734054  
O 1.1997577649 0.1637407903 -2.105532844  
O 1.6047445493 -0.3906293782 6.3034782794  
H 2.228787634 -0.3160632188 3.9843868112  
H -0.8226809478 -0.0712282076 4.0734863602  
H -0.38580361 -0.2360621856 7.5059980508  
H 2.0669809923 0.4300806296 -2.4138338916  
H -0.889156426 -0.1324394931 -1.7082145799  
H 3.3743981077 0.3453376604 -0.519901472  
H 3.3255235576 0.156439175 1.9517925386  
H -0.9293779935 -0.4350502012 1.8085031402

ωB97 Caffeic Acid (Neutral) -0.002 a.u.

C 1.2623571662 0.0502299896 -0.7159820537  
C 0.0446028693 -0.0736237078 -0.0345394518  
C 0.0352761781 -0.124793081 1.3444971487  
C 1.232282013 -0.0542308786 2.0685380127  
C 2.4334073237 0.0697062717 1.3750961166  
C 2.4508949824 0.1214478177 -0.0154393629  
O -1.1242363641 -0.1422326904 -0.7279116007  
C 1.2700339052 -0.1050478202 3.5380458157  
C 0.2366975846 -0.2454902731 4.3670879221  
C 0.4809502846 -0.2723153853 5.8292264745  
O -0.6675703419 -0.4181669617 6.5215672877  
O 1.1695270601 0.093593416 -2.0859518698  
O 1.5555613867 -0.1782995912 6.3672669878  
H 2.2544654037 -0.0180894182 3.9958711111  
H -0.7919471115 -0.3440783627 4.0373972532  
H -0.4319090928 -0.4260148829 7.4588229099  
H 2.043843063 0.1839094319 -2.4699705739

H -0.9243991377 -0.0885332297 -1.668245584  
H 3.3916538012 0.218322868 -0.5517401098  
H 3.3666672906 0.1263760065 1.9264159928  
H -0.9230472643 -0.2189975189 1.8445315738

ωB97 Caffeic Acid (Neutral) -0.004 a.u.

C 1.2612546044 0.0505266577 -0.7166900764  
C 0.0436032863 -0.0771775558 -0.0394942438  
C 0.0303110923 -0.130880735 1.3401609057  
C 1.2246412518 -0.058981411 2.0675492854  
C 2.4273369618 0.0683560117 1.3765028746  
C 2.4479433229 0.1227462729 -0.0133855248  
O -1.1245389396 -0.1471453094 -0.7386687842  
C 1.2623815275 -0.110565038 3.5382920893  
C 0.2308621419 -0.2448453394 4.3687306752  
C 0.4861779315 -0.2718303563 5.8329464206  
O -0.6563621309 -0.4073295824 6.5314069099  
O 1.1773501625 0.0968840241 -2.0917259235  
O 1.568849038 -0.1848784409 6.3530089183  
H 2.2472259015 -0.0287566409 3.9960841507  
H -0.8003760113 -0.3370685911 4.04455446  
H -0.4211227297 -0.4156244414 7.469483995  
H 2.0567538363 0.1979783028 -2.4602941744  
H -0.9176477794 -0.0882408066 -1.6766335112  
H 3.3903108396 0.2226010486 -0.5469421595  
H 3.3586367488 0.1260034399 1.9308385689  
H -0.9284800562 -0.2280995096 1.8388591443

ωB97 Caffeic Acid (Neutral) -0.006 a.u.

C 1.2603586103 0.0518423208 -0.7175866083  
C 0.0427653912 -0.0846670386 -0.04541834  
C 0.0249609371 -0.14351524 1.3347260094  
C 1.216115441 -0.067959001 2.0663714711  
C 2.4204079604 0.0670897546 1.3782630086  
C 2.4447069112 0.1269676882 -0.0107770381  
O -1.1239134282 -0.1585001851 -0.7513684676  
C 1.2539813143 -0.1219828661 3.5379293494  
C 0.2240372816 -0.2414181262 4.3711470031  
C 0.4920778694 -0.2713332834 5.8369433965  
O -0.6446287085 -0.3844048152 6.5431397076  
O 1.1860547602 0.1038039158 -2.0976284792  
O 1.5840098827 -0.2029032581 6.3375926703  
H 2.2401373852 -0.0535932211 3.9951058139  
H -0.8109220588 -0.3175083431 4.0538974586  
H -0.4085236451 -0.3953369739 7.4817384857  
H 2.0695199982 0.2236237771 -2.4497645433

H -0.9098316173 -0.0890985641 -1.6864909144  
H 3.3886708956 0.2333543824 -0.5409170549  
H 3.3492986857 0.1271873127 1.9362125306  
H -0.9341728666 -0.2479762355 1.831468541

ωB97 Caffeic Acid (Neutral) -0.008 a.u.

C 1.2566511438 0.0743762117 -0.7161885215  
C 0.0458259979 -0.1308413204 -0.053014757  
C 0.0268121302 -0.2289801593 1.3259503099  
C 1.2115209525 -0.1234809656 2.0635260811  
C 2.4121644079 0.072302923 1.381799125  
C 2.4362565774 0.1743730061 -0.0040256831  
O -1.115888226 -0.2381411876 -0.7677117603  
C 1.2501673016 -0.208203719 3.5343613212  
C 0.2191368197 -0.1895484707 4.3734315605  
C 0.4960966154 -0.2741860194 5.8393950481  
O -0.6349757647 -0.2221216935 6.5561871039  
O 1.189742389 0.1605540961 -2.0996752946  
O 1.5947059295 -0.3743913255 6.3172232499  
H 2.2386470949 -0.2776834267 3.9864129661  
H -0.8181498145 -0.1029803018 4.0653966984  
H -0.400009167 -0.2738522778 7.4945265709  
H 2.0674596437 0.3577095918 -2.4300445894  
H -0.8987488103 -0.1276398533 -1.6976757001  
H 3.3770643061 0.3309419035 -0.5280366131  
H 3.3366739909 0.150975146 1.9446200127  
H -0.9260425179 -0.3955101575 1.8181268714

ωB97 Gallic Acid (Neutral) -0.010 a.u.

C -0.9538037561 -1.1573719584 0.0021042954  
C -1.6913481898 0.0196751832 0.0003051724  
C -1.0461651954 1.2494390677 -0.0040882237  
C 0.3418774382 1.3055131046 -0.0066818485  
C 1.0649480123 0.1184758269 -0.004832807  
C 0.4251246951 -1.118609594 -0.0004485301  
O -3.0727684038 -0.0060492094 0.0028843372  
O -1.7880018079 2.3991069303 -0.0057781855  
C 2.5684491739 0.0825638359 -0.0073420611  
O 3.1195331627 1.3006107596 -0.0111794435  
O -1.7006807887 -2.3178359 0.0065024798  
O 3.1915169765 -0.9440375307 -0.0061000254  
H 1.0309850769 -2.0207934225 0.0008619161  
H 0.8466264377 2.2645378464 -0.0100498575  
H -1.1047109624 -3.0714007484 0.008186623  
H -3.3275000191 -0.9344978115 0.0063384121  
H -2.7155271223 2.1463029725 -0.0029571015

H 4.0830062723 1.1955956479 -0.0124311522

ωB97 Gallic Acid (Neutral) -0.002 a.u.

C -0.9530509516 -1.1699887775 0.002278237  
C -1.6907131082 0.0098545656 0.0005073352  
C -1.0419290753 1.2406334583 -0.0038924855  
C 0.3453819662 1.2925309786 -0.0065052908  
C 1.0691362956 0.1051138938 -0.004662832  
C 0.4280161604 -1.1323281245 -0.0002663156  
O -3.0571010539 0.0058506279 0.002956486  
O -1.7675126429 2.3905981945 -0.0056208519  
C 2.5609509084 0.0917570227 -0.0072819559  
O 3.1040948322 1.3233344267 -0.0115578701  
O -1.7014027548 -2.3206833034 0.0065734343  
O 3.2310297383 -0.9099845708 -0.0058543766  
H 1.023533141 -2.0403985966 0.0010474717  
H 0.8438171608 2.2541660983 -0.0099586189  
H -1.1235216634 -3.0871566564 0.0078129812  
H -3.3589942473 -0.9088547991 0.0059285489  
H -2.7030913437 2.1620197531 -0.0032947252  
H 4.0629176383 1.2047608086 -0.0129151719

ωB97 Gallic Acid (Neutral) -0.004 a.u.

C -0.9532824379 -1.1667237424 0.0022396176  
C -1.6907517984 0.0123763855 0.0004633664  
C -1.0429303324 1.2427998892 -0.0039369671  
C 0.34456476 1.295668233 -0.006548077  
C 1.0678704036 0.1083447673 -0.0047058827  
C 0.4272517821 -1.1289351679 -0.000310671  
O -3.0608780877 0.0027719 0.0029440702  
O -1.7723148009 2.392797366 -0.0056576601  
C 2.5626346922 0.0894607404 -0.0073041835  
O 3.1075765466 1.3176944746 -0.0114592549  
O -1.7013087534 -2.3197934253 0.0065586098  
O 3.221043308 -0.9185401416 -0.0059226388  
H 1.0252028563 -2.0355928469 0.0010015442  
H 0.8446485443 2.25659179 -0.0099821391  
H -1.1188779405 -3.0830565074 0.0079068841  
H -3.3504846397 -0.9157347581 0.006019648  
H -2.7059444711 2.1583446628 -0.0032230472  
H 4.067541369 1.2027513806 -0.0127892187

ωB97 Gallic Acid (Neutral) -0.006 a.u.

C -0.9534659773 -1.1635362856 0.0021979966  
C -1.6908686903 0.0148490741 0.0004158094  
C -1.0439911393 1.2450062809 -0.0039841166

C 0.3436818745 1.2989317012 -0.0065923145  
C 1.0667292371 0.1117059012 -0.0047493702  
C 0.4265303005 -1.1254747936 -0.0003563425  
O -3.0647391526 -0.0002392184 0.0029293166  
O -1.7773824888 2.3949446394 -0.0056955705  
C 2.5644001289 0.0871384817 -0.0073227826  
O 3.1113627428 1.3119599724 -0.0113637972  
O -1.7011114396 -2.3190410018 0.0065421545  
O 3.2109928526 -0.927159661 -0.0059838483  
H 1.0271719905 -2.0305874632 0.0009539222  
H 0.8453547741 2.2591899224 -0.010006145  
H -1.114129558 -3.0790677192 0.0079996292  
H -3.3424316793 -0.9222807164 0.0061178305  
H -2.7090160202 2.1544719921 -0.0031433457  
H 4.0724732445 1.2004138937 -0.0126650258

ωB97 Gallic Acid (Neutral) -0.008 a.u.

C -0.9536324248 -1.1604428355 0.0021525278  
C -1.6910665779 0.0172625817 0.0003626274  
C -1.0450790328 1.2472110795 -0.0040339515  
C 0.34277288 1.3022406563 -0.0066350071  
C 1.0657420357 0.1151139416 -0.0047893532  
C 0.4258306947 -1.1220126729 -0.0004014435  
O -3.0687092781 -0.0031081105 0.0029075529  
O -1.7826457343 2.3970247612 -0.0057353811  
C 2.5663264145 0.0848229524 -0.0073300431  
O 3.1153793809 1.3062178125 -0.0112741297  
O -1.700834021 -2.3184490379 0.0065219067  
O 3.2010784612 -0.9357169627 -0.0060408217  
H 1.0292032287 -2.0255764605 0.0009078685  
H 0.8459860142 2.2618730982 -0.0100257491  
H -1.1092842193 -3.075201816 0.008092414  
H -3.3349242488 -0.928409803 0.006222409  
H -2.7122399876 2.1504057054 -0.0030547174  
H 4.0776574145 1.1979701101 -0.0125527088

ωB97 Caffeic Acid (Radical) -0.010 a.u.

C 1.2557231539 0.0556435611 -0.7689128399  
C 0.0005185244 -0.0815853866 -0.0198262866  
C -0.0347720367 -0.1377090674 1.3448200768  
C 1.1736465615 -0.0616436249 2.0762982866  
C 2.4119145565 0.0753426479 1.365702974  
C 2.4666362943 0.1324098354 0.0093125909  
O -1.1024873633 -0.1476657502 -0.7858195156  
C 1.2393167832 -0.1150924616 3.5173116554  
C 0.2076322448 -0.241677404 4.3718763771

C 0.5060290892 -0.2770467655 5.8413795358  
O -0.6117783827 -0.391861865 6.5599318144  
O 1.1965643621 0.0953571209 -2.016687122  
O 1.6184724047 -0.2090863025 6.2878219481  
H 2.2264557204 -0.0460794899 3.9714503153  
H -0.831300883 -0.3199058035 4.0676815381  
H -0.3817472949 -0.4071921928 7.5022908685  
H -0.7609202166 -0.0807393507 -1.6947092167  
H 3.405992675 0.2370875906 -0.5231484177  
H 3.3236239883 0.1336116514 1.9529295563  
H -0.9878681811 -0.2396479428 1.8520688611

ωB97 Caffeic Acid (Radical) -0.002 a.u.

C 1.2499258489 0.0541141527 -0.7689300698  
C -0.0028174896 -0.0798134993 -0.0064654712  
C -0.0157403968 -0.1337360585 1.363159002  
C 1.1991945654 -0.0588435848 2.0710242849  
C 2.4326620574 0.07286919 1.3544263164  
C 2.4752972745 0.1276570991 -0.0017734768  
O -1.1138363828 -0.1438589481 -0.7411500349  
C 1.2658076176 -0.108868758 3.5198875388  
C 0.2309960761 -0.2412133435 4.3639049026  
C 0.4881740391 -0.2723499475 5.8261079306  
O -0.6539150235 -0.4097557375 6.5248203325  
O 1.1798291479 0.0955498319 -2.0044703569  
O 1.5719248231 -0.1870039187 6.3445017832  
H 2.2543424128 -0.0313761449 3.969079756  
H -0.8008173962 -0.3295497664 4.0421472968  
H -0.4174160622 -0.4217431993 7.4621782207  
H -0.8145576578 -0.0832335364 -1.6664270044  
H 3.4056775581 0.2272873556 -0.5498465085  
H 3.3514166952 0.1285783014 1.9309712737  
H -0.964495707 -0.2321904879 1.8786272843

ωB97 Caffeic Acid (Radical) -0.004 a.u.

C 1.2508542889 0.054285959 -0.7687541302  
C -0.0019935912 -0.0800770221 -0.0090160988  
C -0.0195426837 -0.1344192808 1.3596140386  
C 1.1939412681 -0.0593731178 2.0720118622  
C 2.4281835011 0.0733270859 1.3566470007  
C 2.4731599844 0.1285168645 0.0003959268  
O -1.1115511896 -0.1444485209 -0.7504627497  
C 1.2602865873 -0.1100872191 3.52004125  
C 0.2260965427 -0.2416549383 4.3649525137  
C 0.4919564859 -0.2733774857 5.82949166  
O -0.6447708561 -0.4060352713 6.5319060728

O 1.1828153667 0.0952759842 -2.0071563333  
O 1.582487609 -0.191297481 6.3312574516  
H 2.2482275177 -0.0339892113 3.970777421  
H -0.8071489491 -0.32832207 4.0465891397  
H -0.4109498904 -0.4186067757 7.4706956747  
H -0.802309181 -0.0825288127 -1.6720015612  
H 3.4054766323 0.2291615497 -0.5443339289  
H 3.3454557719 0.1295759899 1.935411433  
H -0.9690232148 -0.2334072265 1.8737063575

ωB97 Caffeic Acid (Radical) -0.006 a.u.

C 1.2520381594 0.0554863463 -0.7686151095  
C -0.0010971559 -0.0810658866 -0.0120391569  
C -0.0238022544 -0.1367708307 1.3554259391  
C 1.188067295 -0.0609127571 2.0732212937  
C 2.4232997215 0.0741113369 1.3592630136  
C 2.4709464414 0.1307548958 0.0030267057  
O -1.1087835219 -0.1463981396 -0.7609702668  
C 1.254251471 -0.1129347635 3.5196496916  
C 0.2205230556 -0.2409802694 4.3665863364  
C 0.4961775695 -0.2744603055 5.8331025272  
O -0.6349931574 -0.3997631794 6.5400706206  
O 1.1862920604 0.0964331248 -2.0099561049  
O 1.5939305973 -0.1984395105 6.3173814597  
H 2.241965698 -0.0408108394 3.9716193279  
H -0.8146061813 -0.3227260813 4.0522783125  
H -0.403141464 -0.4136819536 7.4801634406  
H -0.7894559072 -0.0821230959 -1.6786161607  
H 3.4052916925 0.2334931138 -0.5380188062  
H 3.3388863064 0.1311454037 1.940559048  
H -0.974138426 -0.2378376088 1.8676408883

ωB97 Caffeic Acid (Radical) -0.008 a.u.

C 1.2536851342 0.0555569894 -0.7686810976  
C -0.0003061459 -0.0813122289 -0.0155956849  
C -0.0289302373 -0.1372473221 1.3505469682  
C 1.1812893364 -0.0612871122 2.0746674445  
C 2.4179038401 0.0746940838 1.3622504785  
C 2.4688274106 0.1315539746 0.0059688779  
O -1.1058421104 -0.146989317 -0.7726528919  
C 1.2472364667 -0.1140141202 3.518770603  
C 0.2144236672 -0.241342543 4.3688337212  
C 0.5008324674 -0.2756806184 5.8370035778  
O -0.6239569153 -0.3960014051 6.5493333514  
O 1.1909629164 0.0958615048 -2.013142874  
O 1.6057949872 -0.2033752186 6.3029178503



H 2.2345741928 -0.043385043 3.9719779992  
H -0.8224953202 -0.3213796554 4.0591751495  
H -0.3933428491 -0.4105659494 7.4906052562  
H -0.775700309 -0.0813966228 -1.6860863445  
H 3.4055481833 0.2352388071 -0.5310165685  
H 3.331647019 0.1323271562 1.9463582434  
H -0.9804997342 -0.2387363601 1.8605389403

$\omega$ B97 Gallic Acid (Radical) -0.010 a.u.

C -0.9475960018 -1.2094833111 0.0031613615  
C -1.7528158908 0.0020594738 0.0014466567  
C -1.0214832897 1.2703697585 -0.0033766731  
C 0.3520130937 1.3321112539 -0.0064133977  
C 1.0610601747 0.1261878807 -0.0047018528  
C 0.4177036404 -1.128522869 0.0000871043  
O -2.9994530016 0.0268309311 0.0039485556  
O -1.8011290253 2.3603905116 -0.0046674318  
C 2.5673727002 0.084892252 -0.0078961463  
O 3.1172772721 1.3007228233 -0.012148845  
O -1.6381282901 -2.371851888 0.0078319075  
O 3.1787984152 -0.9478635178 -0.0066310324  
H 1.0456310028 -2.015784236 0.0012062798  
H 0.8723524295 2.2821962346 -0.0100231588  
H -1.0098909226 -3.1013187404 0.0089958832  
H -2.7086149706 2.0096226653 -0.0017679033  
H 4.0819946639 1.2025637777 -0.0137563074

$\omega$ B97 Gallic Acid (Radical) -0.002 a.u.

C -0.9463049824 -1.2191641377 0.0032064647  
C -1.7516851172 -0.0018428886 0.0015954979  
C -1.020073297 1.2682205551 -0.0033414223  
C 0.3554950726 1.3224596531 -0.006389582  
C 1.0623660883 0.1157480648 -0.0046078367  
C 0.4216938555 -1.1402701012 0.0001592469  
O -2.9889495126 0.0202069082 0.0041396659  
O -1.7830448969 2.3608395406 -0.0046825329  
C 2.5576238731 0.0928763481 -0.0077051714  
O 3.1046444708 1.3196566257 -0.0124762285  
O -1.6454550417 -2.3676376466 0.0077443893  
O 3.2124366083 -0.9177458898 -0.00613275  
H 1.0421098533 -2.0317842854 0.0012778672  
H 0.8718078641 2.2740688079 -0.0100802789  
H -1.0393617506 -3.1147197632 0.0086020017  
H -2.7023229944 2.0388606286 -0.0019192728  
H 4.0641119068 1.2033505806 -0.014095058

$\omega$ B97 Gallic Acid (Radical) -0.004 a.u.

|   |               |               |               |
|---|---------------|---------------|---------------|
| C | -0.9466472767 | -1.2166463432 | 0.0031902143  |
| C | -1.7518287404 | -0.0008046118 | 0.0015516504  |
| C | -1.0204019168 | 1.2687230806  | -0.0033483138 |
| C | 0.3546727606  | 1.3248614802  | -0.0063925054 |
| C | 1.0617462092  | 0.1183814279  | -0.0046293476 |
| C | 0.4207027895  | -1.1371960028 | 0.0001365073  |
| O | -2.9913763345 | 0.0220294617  | 0.0040894193  |
| O | -1.7874978401 | 2.3606961324  | -0.0046730991 |
| C | 2.5598315529  | 0.0907762588  | -0.0077357793 |
| O | 3.1075802303  | 1.3147154687  | -0.0124121291 |
| O | -1.6434651927 | -2.3686971081 | 0.0077601544  |
| O | 3.2036065154  | -0.9255511263 | -0.0062269962 |
| H | 1.0431915685  | -2.0274887238 | 0.0012526168  |
| H | 0.8719941813  | 2.2760611919  | -0.010057373  |
| H | -1.0315124174 | -3.1111901262 | 0.0087000801  |
| H | -2.7038398499 | 2.0313692321  | -0.0018796512 |
| H | 4.0683357606  | 1.2030833078  | -0.0140304479 |

$\omega$ B97 Gallic Acid (Radical) -0.006 a.u.

|   |               |               |               |
|---|---------------|---------------|---------------|
| C | -0.9469720697 | -1.2142019451 | 0.0031759741  |
| C | -1.7520756135 | 0.0001847299  | 0.0015091631  |
| C | -1.0207408618 | 1.2692399088  | -0.0033563681 |
| C | 0.3538210033  | 1.3272491858  | -0.0063952437 |
| C | 1.0613299935  | 0.1209804884  | -0.0046501013 |
| C | 0.4197039372  | -1.1342334384 | 0.0001170051  |
| O | -2.9939340678 | 0.0237293308  | 0.0040418252  |
| O | -1.7919730899 | 2.3605807959  | -0.0046678336 |
| C | 2.5622142718  | 0.0887450124  | -0.0077717181 |
| O | 3.1106411549  | 1.3099217867  | -0.012337322  |
| O | -1.6415850825 | -2.3697578981 | 0.0077787804  |
| O | 3.1950900923  | -0.9331616795 | -0.0063425356 |
| H | 1.0440919962  | -2.0234358144 | 0.0012324086  |
| H | 0.87215275    | 2.2780565412  | -0.010035964  |
| H | -1.02398857   | -3.1077810641 | 0.0087998623  |
| H | -2.7053892135 | 2.0240702764  | -0.0018438755 |
| H | 4.0727053695  | 1.2029367833  | -0.013959057  |

$\omega$ B97 Gallic Acid (Radical) -0.008 a.u.

|   |               |               |               |
|---|---------------|---------------|---------------|
| C | -0.9473120055 | -1.2118455045 | 0.003169859   |
| C | -1.7524065104 | 0.0011347122  | 0.001486236   |
| C | -1.0210817755 | 1.2697847652  | -0.0033666483 |
| C | 0.3529639797  | 1.3296217366  | -0.0064094934 |
| C | 1.0611354141  | 0.1235233607  | -0.0046802067 |
| C | 0.4186979707  | -1.131392398  | 0.0000991079  |
| O | -2.9966427111 | 0.0252891766  | 0.0039919005  |

O -1.7964054884 2.3605198405 -0.004666645  
C 2.5646923772 0.0868253337 -0.0078387171  
O 3.1137903731 1.3053921246 -0.0122507761  
O -1.6398435867 -2.3708162233 0.0078047493  
O 3.1869587088 -0.9404834614 -0.0064624707  
H 1.0448077671 -2.0196438437 0.0012131633  
H 0.8723156113 2.2800503869 -0.0100383391  
H -1.0168760607 -3.1045499254 0.0088931286  
H -2.7068718467 2.0168806037 -0.0017964175  
H 4.0771697829 1.2028323157 -0.0138534306

ωB97 Caffeic Acid (Neutral) Zero field

C 1.2635660887 0.0506096733 -0.715489162  
C 0.0456054425 -0.0716203959 -0.0302437277  
C 0.0397679982 -0.1216457625 1.3481482823  
C 1.239125893 -0.0514470911 2.0695272342  
C 2.4388879687 0.0710585292 1.3739132783  
C 2.4537274551 0.1215411831 -0.0170730275  
O -1.1235575506 -0.1397022462 -0.7184371708  
C 1.2770383962 -0.1022455453 3.5373812034  
C 0.2417653561 -0.2446338039 4.366040512  
C 0.4762764541 -0.2726106539 5.8256835822  
O -0.6781801287 -0.4239776517 6.5130575141  
O 1.1624955177 0.0922598291 -2.0803040828  
O 1.5435153619 -0.1763072898 6.3807375271  
H 2.2615908589 -0.0141261037 3.9949065506  
H -0.784949705 -0.3449387878 4.0316330642  
H -0.44109317 -0.4324478818 7.4492745367  
H 2.0313812722 0.1745490247 -2.4791547365  
H -0.9304651341 -0.0901665029 -1.6609656143  
H 3.3929544053 0.2170623507 -0.5557148956  
H 3.3738222017 0.127337086 1.9226515624  
H -0.9181639818 -0.2148759598 1.8490115697

ωB97 Caffeic Acid (Neutral) 0.010 a.u.

C 1.2724058588 0.0525341605 -0.716023763  
C 0.0477125264 -0.0703952742 -0.0179730547  
C 0.051242598 -0.1196216776 1.3566702632  
C 1.2593296378 -0.0474229103 2.0757524091  
C 2.4576937401 0.0756338804 1.3709608234  
C 2.468582009 0.1248340574 -0.0193072844  
O -1.1169208748 -0.1390761287 -0.690569999  
C 1.2990704525 -0.0991935529 3.5270573048  
C 0.2561891423 -0.2363211824 4.3693085267  
C 0.4603134353 -0.2721099713 5.8090888515  
O -0.7181946547 -0.4288849132 6.4910907431

O 1.1420292943 0.0898605643 -2.0539857609  
O 1.4984588647 -0.183539713 6.4375761771  
H 2.2869593096 -0.0187525686 3.9808767486  
H -0.7658528583 -0.3304266019 4.0218842589  
H -0.4563611474 -0.4438572719 7.4178145151  
H 1.9813710901 0.1632510372 -2.5197507425  
H -0.9524437273 -0.0988522546 -1.6421469258  
H 3.4029584561 0.2191940464 -0.5643595321  
H 3.3971572608 0.1322056547 1.9133906373  
H -0.9065894133 -0.2153873803 1.8572298035

ωB97 Caffeic Acid (Neutral) 0.002 a.u.

C 1.2649672792 0.0509916652 -0.7151853755  
C 0.0465038656 -0.0706961338 -0.0265829634  
C 0.0436245479 -0.1201789999 1.3511388004  
C 1.2450899816 -0.0498502896 2.070551397  
C 2.4437854758 0.0721647281 1.3729641013  
C 2.4565557979 0.1219865952 -0.0183155418  
O -1.1225619541 -0.1387005553 -0.7102847281  
C 1.2831816936 -0.1008276347 3.5362880986  
C 0.246038304 -0.2432408414 4.3655146679  
C 0.4721109738 -0.2726743889 5.8222228738  
O -0.6879305669 -0.4269446131 6.5059206172  
O 1.156396561 0.0914460977 -2.0748119577  
O 1.5325779332 -0.1763299216 6.3933305117  
H 2.2680949553 -0.0132651666 3.9934181688  
H -0.7791843645 -0.343320616 4.0271557725  
H -0.4482909559 -0.4363812807 7.4408476798  
H 2.0195088639 0.1695513252 -2.4878895789  
H -0.9358771346 -0.0919113872 -1.6548313462  
H 3.3944151764 0.2168407627 -0.5589208474  
H 3.3801261847 0.1283516381 1.9195596437  
H -0.9140216178 -0.2133389836 1.8524940063

ωB97 Caffeic Acid (Neutral) 0.004 a.u.

C 1.2665895162 0.0514531811 -0.7150708679  
C 0.047203142 -0.0703272303 -0.0235434894  
C 0.0466866422 -0.1196489522 1.3534361723  
C 1.250073726 -0.0489333436 2.0716444567  
C 2.4480274972 0.0731453195 1.3722666544  
C 2.4593948529 0.1226987828 -0.019170164  
O -1.121308498 -0.1384651106 -0.7035392098  
C 1.2883683037 -0.1001927986 3.5347328522  
C 0.2495255752 -0.2415068692 4.3655638436  
C 0.4685063007 -0.2725837071 5.8188495262  
O -0.6967022557 -0.4283404541 6.5001880762

O 1.1512590855 0.0910544237 -2.0694703443  
O 1.5227377751 -0.1774793104 6.4051481345  
H 2.2738301535 -0.0141944737 3.9913347184  
H -0.7745845496 -0.3402492954 4.0240780019  
H -0.4533098304 -0.4389981756 7.4335396983  
H 2.0084824821 0.1666001407 -2.4963024493  
H -0.9405474412 -0.0937682194 -1.6499591918  
H 3.3961220489 0.2173150743 -0.5612881589  
H 3.3855314847 0.129393258 1.9171341929  
H -0.910775011 -0.2133002399 1.8550115477

ωB97 Caffeic Acid (Neutral) 0.006 a.u.

C 1.2683741274 0.0518062136 -0.7151867504  
C 0.0476807731 -0.0701574825 -0.0211349652  
C 0.048998593 -0.1193412932 1.355125886  
C 1.2540944091 -0.0481966279 2.0728367591  
C 2.4517507016 0.0740307805 1.3717259319  
C 2.4623310886 0.1233401144 -0.0196185924  
O -1.1199274969 -0.1384353289 -0.6980097117  
C 1.2926838562 -0.0996708314 3.53272207  
C 0.2523589559 -0.2398768372 4.3661701454  
C 0.4653701999 -0.2724693145 5.8155620321  
O -0.7045740849 -0.4291496184 6.4958227378  
O 1.147171694 0.0905599761 -2.0642537617  
O 1.5137953095 -0.1789899515 6.4163676767  
H 2.2787997122 -0.0152439516 3.9886358849  
H -0.7708444624 -0.3373419464 4.0221732779  
H -0.4563098513 -0.4410560118 7.4273223131  
H 1.9984397891 0.1647285426 -2.5044039875  
H -0.9448527814 -0.095450468 -1.646216673  
H 3.398096736 0.2177458125 -0.5629960368  
H 3.3901468687 0.1303584608 1.9153537515  
H -0.9084731373 -0.213518237 1.8565860123

ωB97 Caffeic Acid (Neutral) 0.008 a.u.

C 1.2703270273 0.0521519089 -0.7154987703  
C 0.0478663756 -0.0701628318 -0.0192905287  
C 0.0505077795 -0.1192964167 1.3561996036  
C 1.2571642281 -0.0476649214 2.0741904482  
C 2.4549468748 0.074864281 1.3713246595  
C 2.4653792432 0.1240319867 -0.0196630037  
O -1.11844079 -0.1386060119 -0.6937166528  
C 1.2961959774 -0.099315237 3.5301864946  
C 0.2545508142 -0.2381918634 4.3673922153  
C 0.4626717445 -0.2723189533 5.8123066106  
O -0.7116653532 -0.4293785493 6.4927922624

O 1.1440869421 0.0901405764 -2.0591053367  
O 1.5057451608 -0.1809677749 6.4270900865  
H 2.2831009342 -0.0166806353 3.9852143563  
H -0.7679687096 -0.3341852637 4.021458415  
H -0.4572690623 -0.4426809213 7.4220975366  
H 1.9893909233 0.1635448102 -2.5122216563  
H -0.9487525733 -0.0971080978 -1.6436339554  
H 3.400375103 0.2183353074 -0.5639941633  
H 3.3939944841 0.1313011118 1.9141439876  
H -0.9070961237 -0.2141405047 1.857311391

ωB97 Gallic Acid (Neutral) Zero field

C -0.9527494326 -1.1732228145 0.0023142899  
C -1.6907334699 0.0073764691 0.0005483073  
C -1.0410099866 1.2386130118 -0.00385101  
C 0.3461166784 1.2895698271 -0.0064653539  
C 1.0705198569 0.1020499533 -0.004621854  
C 0.4288208701 -1.1356318643 -0.0002235872  
O -3.0533574875 0.0086160458 0.0029689033  
O -1.7629794408 2.3884707306 -0.0055857612  
C 2.5593046507 0.0940273465 -0.007260327  
O 3.1009355089 1.3288704017 -0.0116554009  
O -1.701638612 -2.3214328529 0.0065876564  
O 3.2408962332 -0.9015236125 -0.0057831761  
H 1.0221736176 -2.044973785 0.0010914141  
H 0.8428801211 2.2519456532 -0.0099380193  
H -1.1285433027 -3.0912661519 0.0077196442  
H -3.3672105396 -0.9022899563 0.0058448142  
H -2.7004714153 2.1656690229 -0.0033596126  
H 4.0586071502 1.2063575755 -0.0130369272

ωB97 Gallic Acid (Neutral) 0.010 a.u.

C -0.950153395 -1.1897266237 0.0024642095  
C -1.6918637421 -0.0046494163 0.0007166662  
C -1.0371996677 1.2304733694 -0.0036808245  
C 0.3487174705 1.2767922333 -0.0062848447  
C 1.0799509346 0.0885494425 -0.0044119486  
C 0.4332017926 -1.1514035111 -0.0000122684  
O -3.0350123187 0.0190827553 0.0030181412  
O -1.7437326281 2.3787785554 -0.005442006  
C 2.551743159 0.1051117899 -0.0070848411  
O 3.0892584396 1.3560818948 -0.0121509272  
O -1.704166787 -2.3242025579 0.0066424778  
O 3.2901461588 -0.8600227002 -0.005410409  
H 1.0181587946 -2.0659325167 0.0013046575

H 0.8368192097 2.2432931985 -0.0098491778  
H -1.1581356949 -3.1126155126 0.0072268876  
H -3.4067873204 -0.872007358 0.0055319845  
H -2.6903562644 2.1837656129 -0.0036196408  
H 4.0409728589 1.2098563445 -0.0136641361

ωB97 Gallic Acid (Neutral) 0.002 a.u.

C -0.9523802831 -1.1764434233 0.002347329  
C -1.6908176581 0.0049378439 0.0005862752  
C -1.0401557661 1.2367226431 -0.0038131849  
C 0.3467796586 1.2867495618 -0.0064296472  
C 1.0720457297 0.0991182875 -0.0045845909  
C 0.4296513842 -1.1388774569 -0.000183678  
O -3.049654754 0.0111111446 0.002981718  
O -1.7586795092 2.3864186134 -0.0055530041  
C 2.5577052107 0.0962854268 -0.0072418357  
O 3.0980572178 1.3343482162 -0.0117494755  
O -1.7019995206 -2.3220765678 0.0066009445  
O 3.2507256421 -0.8931136788 -0.0057091969  
H 1.0210268695 -2.0493973961 0.0011314571  
H 0.8418626039 2.2498881232 -0.0099219156  
H -1.1339042448 -3.0953979138 0.0076291961  
H -3.3752148352 -0.8959841862 0.0057712545  
H -2.6980544678 2.1693134126 -0.0034174108  
H 4.0545677224 1.2076223497 -0.0131502347

ωB97 Gallic Acid (Neutral) 0.004 a.u.

C -0.9519521462 -1.1797104581 0.0023780236  
C -1.6909725157 0.0024987931 0.000621846  
C -1.039345514 1.2349254226 -0.0037783858  
C 0.3473828502 1.2840445397 -0.0063964308  
C 1.0737332307 0.0962921285 -0.0045487224  
C 0.4305046424 -1.1420821832 -0.0001453292  
O -3.0459987173 0.0134933473 0.0029943505  
O -1.7545991425 2.3843930408 -0.0055229513  
C 2.5561796618 0.098521947 -0.0072216386  
O 3.0954317717 1.3397841253 -0.0118416797  
O -1.7023818617 -2.3227347242 0.0066134033  
O 3.2605705454 -0.8847508527 -0.0056333938  
H 1.0200455587 -2.0537134171 0.001168861  
H 0.8407591949 2.2479756305 -0.0099081968  
H -1.1394154446 -3.0996056604 0.0075383779  
H -3.3833299964 -0.8896561756 0.0057072162  
H -2.6958271124 2.1728985301 -0.003470524  
H 4.0507759951 1.2086509663 -0.0132608261

$\omega$ B97 Gallic Acid (Neutral) 0.006 a.u.

C -0.951450277 -1.1830118835 0.0024069613  
C -1.691193938 0.0000808952 0.0006556894  
C -1.0385799386 1.2332679482 -0.0037455966  
C 0.3479191284 1.2814770994 -0.0063638023  
C 1.0755973402 0.0935824062 -0.0045112794  
C 0.431385647 -1.1452387643 -0.0001064186  
O -3.0423450353 0.0156485584 0.0030069768  
O -1.7507370836 2.3824265205 -0.0054945934  
C 2.5546972783 0.1007316929 -0.0071930898  
O 3.0930640886 1.3452021345 -0.0119388309  
O -1.7028583235 -2.3233214175 0.0066245192  
O 3.2704120419 -0.8764533822 -0.0055515659  
H 1.0192421439 -2.0579112591 0.0012066932  
H 0.8395588724 2.2462337874 -0.0098945892  
H -1.1452555515 -3.1038772145 0.0074409493  
H -3.3913341001 -0.8834962718 0.0056499296  
H -2.6937894377 2.1764749974 -0.0035203227  
H 4.0472281446 1.2094091527 -0.0133776299

$\omega$ B97 Gallic Acid (Neutral) 0.008 a.u.

C -0.950854019 -1.1863404918 0.0024349708  
C -1.6914880654 -0.0022987497 0.0006873136  
C -1.0378706076 1.2317856089 -0.00371361  
C 0.3483649104 1.2790681611 -0.006328019  
C 1.0776564781 0.0910093187 -0.0044674976  
C 0.432289519 -1.1483385443 -0.0000636252  
O -3.03868055 0.0174983077 0.0030161598  
O -1.7471169776 2.3805535531 -0.0054676297  
C 2.553219554 0.1029235892 -0.0071493947  
O 3.0910065449 1.3506169919 -0.012042006  
O -1.7034646699 -2.3237933562 0.0066336112  
O 3.2802413887 -0.8682273807 -0.0054728827  
H 1.0186384268 -2.06196469 0.0012495444  
H 0.8382436668 2.2446823033 -0.0098764101  
H -1.1515132085 -3.1082026758 0.0073378359  
H -3.3991089605 -0.8776404125 0.0055938645  
H -2.6919660222 2.180087632 -0.0035689495  
H 4.0439635918 1.2098058351 -0.013509276

$\omega$ B97 Caffeic Acid (Radical) Zero field

C 1.2493617934 0.0536932747 -0.7692576721  
C -0.0037477847 -0.0793925679 -0.0043548156  
C -0.0126112542 -0.1325782983 1.3661086401  
C 1.2037074419 -0.0579638527 2.070274546  
C 2.4367735711 0.0725005111 1.352518656



C 2.4775589986 0.1265143731 -0.0035878109  
O -1.115870547 -0.1429909405 -0.732864626  
C 1.2705588792 -0.1072155754 3.5192458968  
C 0.2352399158 -0.2410372725 4.3632938583  
C 0.4847954522 -0.2714743036 5.8228517364  
O -0.6621096003 -0.4138000211 6.518852575  
O 1.1777355356 0.0951636406 -2.0020194426  
O 1.5620319203 -0.1827661708 6.3569761518  
H 2.2596368743 -0.0278450009 3.9670129446  
H -0.7951897628 -0.3317695918 4.0384916233  
H -0.4221707053 -0.4251058626 7.4546347347  
H -0.8262000774 -0.0838245862 -1.6616650797  
H 3.4062382653 0.2248502315 -0.5546640833  
H 3.3567714582 0.1276721386 1.9272548325  
H -0.9608583741 -0.2301111252 1.8826703348

$\omega$ B97 Caffeic Acid (Radical) 0.010 a.u.

C 1.2522450116 0.0559930714 -0.7736429281  
C -0.0097170447 -0.0806886599 -0.0001585325  
C -0.0067596373 -0.1340148198 1.3728439155  
C 1.2146526474 -0.0582159071 2.0699822064  
C 2.4522451342 0.0724872007 1.3461047562  
C 2.491461941 0.1271304242 -0.0066706061  
O -1.1206293924 -0.1446491056 -0.7066063121  
C 1.2838880617 -0.105875831 3.5080367452  
C 0.2460697896 -0.2375914362 4.3676218677  
C 0.4726344076 -0.2684876247 5.8067281838  
O -0.6931651964 -0.4173877264 6.5067195832  
O 1.1789037514 0.101893164 -1.9920440691  
O 1.5246217617 -0.1803390621 6.4087934864  
H 2.2771318273 -0.0275534303 3.948169439  
H -0.781234796 -0.328653129 4.035655562  
H -0.4199576158 -0.4290277934 7.43042293  
H -0.8754640081 -0.0892047557 -1.6509861535  
H 3.4143503384 0.2240579799 -0.567900812  
H 3.3747019502 0.1259663994 1.9179856919  
H -0.9543269312 -0.2333199583 1.8907180461

$\omega$ B97 Caffeic Acid (Radical) 0.002 a.u.

C 1.249166179 0.0537549488 -0.7696897911  
C -0.0046835691 -0.079380621 -0.0026370556  
C -0.0100150831 -0.132333965 1.3684918359  
C 1.2075794759 -0.0576596407 2.0697795612  
C 2.4405718339 0.0723526968 1.3509343683  
C 2.4799216452 0.1261537069 -0.0049436253  
O -1.1175926078 -0.1428470403 -0.7255262003

C 1.2746500128 -0.1064646193 3.5180622306  
C 0.2387316331 -0.2404651936 4.3630889997  
C 0.4817446212 -0.2707184238 5.819553051  
O -0.6696464776 -0.4159983402 6.5139565185  
O 1.1764601136 0.095723529 -1.999677452  
O 1.5530006004 -0.1805692145 6.3685373204  
H 2.2643774457 -0.0265533046 3.9644855725  
H -0.7906442756 -0.3320390766 4.0358310736  
H -0.4252503771 -0.4270306661 7.4479227757  
H -0.8374961245 -0.084664939 -1.6577330691  
H 3.4070324781 0.2238496933 -0.5587191908  
H 3.3615995542 0.1271650393 1.9242027583  
H -0.9578550782 -0.2297555693 1.8858533186

$\omega$ B97 Caffeic Acid (Radical) 0.004 a.u.

C 1.249409264 0.0537305657 -0.770349044  
C -0.0057321232 -0.0792975739 -0.0014478939  
C -0.0081291779 -0.1318843416 1.3702552704  
C 1.2106232829 -0.0572283137 2.0694573846  
C 2.4440001115 0.0722611686 1.3496046847  
C 2.482497213 0.12570448 -0.0059204861  
O -1.1190354079 -0.1425922995 -0.719172953  
C 1.277894078 -0.1055734533 3.5163829554  
C 0.2415082843 -0.2401146903 4.3633568837  
C 0.4790394187 -0.2700823998 5.816318883  
O -0.676303832 -0.4180876443 6.5103124222  
O 1.1762719961 0.0961464999 -1.9975915056  
O 1.5447451381 -0.1786606688 6.3793307703  
H 2.2682738576 -0.0249056576 3.9614805516  
H -0.7869552023 -0.3329121415 4.0341695409  
H -0.4264251621 -0.4287958387 7.4422099922  
H -0.848357259 -0.0855494371 -1.6546345244  
H 3.4082977018 0.2226697291 -0.5619971653  
H 3.3657802654 0.1267025727 1.9218765596  
H -0.9557504468 -0.229011556 1.8881306738

$\omega$ B97 Caffeic Acid (Radical) 0.006 a.u.

C 1.2500035242 0.0541957764 -0.7711890642  
C -0.006873132 -0.0795483992 -0.0006258872  
C -0.0068698899 -0.1321660016 1.3715438835  
C 1.2129226839 -0.0572686194 2.0693881343  
C 2.4471280486 0.0722902607 1.3484334913  
C 2.4852582439 0.1258590213 -0.006501317  
O -1.120090599 -0.1429526587 -0.7137983737  
C 1.2805405279 -0.1053496747 3.5141519022  
C 0.2436382933 -0.2394339448 4.3641172051

C 0.4766193444 -0.269511489 5.8130626712  
O -0.6824415345 -0.4187314947 6.5077955921  
O 1.1767074535 0.0974884024 -1.9956086648  
O 1.537275139 -0.1782927186 6.3895255046  
H 2.2717184391 -0.0249470674 3.9578348381  
H -0.7842049369 -0.3322540838 4.0335203211  
H -0.4260129116 -0.4294864626 7.4373334087  
H -0.8586245793 -0.0867051309 -1.6524025429  
H 3.4099004074 0.2225660253 -0.5645906772  
H 3.3694206836 0.1264178028 1.9201066382  
H -0.9543632058 -0.2296505436 1.8896759367

ωB97 Caffeic Acid (Radical) 0.008 a.u.

C 1.2509204656 0.0554561132 -0.7722237959  
C -0.0081378073 -0.0803698853 -0.0002297734  
C -0.0063148117 -0.1337368765 1.3723441294  
C 1.2143250496 -0.0581676819 2.0695340483  
C 2.4498769424 0.0724049727 1.3473365017  
C 2.4881639605 0.1269698244 -0.0066853225  
O -1.1205927592 -0.1442805548 -0.7096520679  
C 1.2825522591 -0.1062072775 3.5113514364  
C 0.2450739092 -0.2381971794 4.365523958  
C 0.4745313125 -0.2689611757 5.8098695872  
O -0.6881255169 -0.4171261167 6.5066336974  
O 1.17753528 0.1004572687 -1.9937132352  
O 1.5307605762 -0.1801126801 6.3992128887  
H 2.2747783038 -0.0276307961 3.9533652956  
H -0.7825326153 -0.3290892889 4.0340999962  
H -0.4239342709 -0.4285300412 7.433464187  
H -0.8676641595 -0.0881084406 -1.651200922  
H 3.4117710267 0.224200114 -0.5665196398  
H 3.3724085167 0.1262700905 1.918842895  
H -0.9537436612 -0.2327213888 1.8904191357

ωB97 Gallic Acid (Radical) Zero field

C -0.946013737 -1.2219347476 0.0032446845  
C -1.7519027756 -0.0029327871 0.0017195606  
C -1.019736554 1.2679494733 -0.0033768816  
C 0.3563922685 1.3199980709 -0.0065720139  
C 1.0631280242 0.1129786804 -0.0048151221  
C 0.4226652858 -1.143578584 0.0000610283  
O -2.9867399321 0.0177027661 0.0043832519  
O -1.7782334932 2.3612384804 -0.0046896282  
C 2.5557962611 0.0949702388 -0.008089978  
O 3.1014956443 1.3248640481 -0.0123648237  
O -1.6476160498 -2.3666681883 0.0078464186

O 3.2214662092 -0.9098861385 -0.0059086891  
H 1.040983359 -2.0363674657 0.0011317555  
H 0.8719326944 2.2719329468 -0.0103717845  
H -1.0479428806 -3.1186546143 0.0085764187  
H -2.7003123979 2.0469256645 -0.0018448137  
H 4.0597300737 1.2045851562 -0.0136343832

$\omega$ B97 Gallic Acid (Radical) 0.010 a.u.

C -0.9425563667 -1.2365521856 0.0033129609  
C -1.7533178649 -0.0093602948 0.0019095161  
C -1.0190688652 1.266741733 -0.0033442357  
C 0.3588211775 1.3098901668 -0.0064462339  
C 1.069956516 0.101369802 -0.0045511006  
C 0.4280026898 -1.1599931832 0.0002747755  
O -2.9769356609 0.0050339086 0.0045356683  
O -1.7583959935 2.3626852365 -0.0047794342  
C 2.5457908247 0.1062938462 -0.0076516829  
O 3.0916343935 1.3508092672 -0.0127535874  
O -1.6581978836 -2.3617080313 0.0076879863  
O 3.2670249259 -0.8702167648 -0.005620347  
H 1.0377620609 -2.0581042474 0.0013673405  
H 0.8688577684 2.264476271 -0.0103309213  
H -1.0922135263 -3.1388716897 0.008078862  
H -2.695335505 2.0883692609 -0.0020940898  
H 4.0432633095 1.2022599048 -0.0143004767

$\omega$ B97 Gallic Acid (Radical) 0.002 a.u.

C -0.9455190267 -1.224653486 0.0032458038  
C -1.7519410457 -0.0041633735 0.0017135947  
C -1.019517046 1.2674409259 -0.0033592396  
C 0.3570485462 1.3176021725 -0.006508208  
C 1.0641054896 0.1103353835 -0.0047280044  
C 0.4237158343 -1.1468610115 0.0001188225  
O -2.984538065 0.0153893452 0.004397868  
O -1.7737390111 2.3614715887 -0.00469939  
C 2.5536528668 0.0972353381 -0.0079280954  
O 3.0988373398 1.3300880448 -0.0124808619  
O -1.6496546202 -2.3656001096 0.0077952334  
O 3.2306619447 -0.9017422797 -0.0058580052  
H 1.0398405488 -2.0409828473 0.0012116786  
H 0.8714816163 2.2700283787 -0.0102998219  
H -1.0562169321 -3.1223476099 0.008470325  
H -2.6988907789 2.0552891166 -0.0019296702  
H 4.0557643392 1.2045934236 -0.0138670294

$\omega$ B97 Gallic Acid (Radical) 0.004 a.u.

C -0.9449394948 -1.2274789065 0.0032452619  
C -1.7521020502 -0.0054695302 0.0017013444  
C -1.019396156 1.2670021313 -0.003339466  
C 0.3575723353 1.3153197949 -0.0064352251  
C 1.0652429723 0.1078032209 -0.0046272767  
C 0.4247888875 -1.1501716704 0.0001833264  
O -2.9824665011 0.012856458 0.0044031705  
O -1.7694494573 2.361743964 -0.0047087153  
C 2.5515993225 0.0995101122 -0.0077448862  
O 3.0965392742 1.3352599827 -0.0126111405  
O -1.6517191243 -2.3645727637 0.0077380858  
O 3.2398972702 -0.8936113697 -0.0058133655  
H 1.0389421447 -2.0455005778 0.0012994207  
H 0.8708575283 2.2682776598 -0.0102146353  
H -1.0647326771 -3.126186502 0.0083615635  
H -2.6977039376 2.0639649076 -0.0020171733  
H 4.0521616634 1.2043760888 -0.0141252893

ωB97 Gallic Acid (Radical) 0.006 a.u.

C -0.9442729617 -1.2304047372 0.0032503966  
C -1.7524197668 -0.0067758782 0.0017080878  
C -1.0193588237 1.2667374061 -0.0033288974  
C 0.3580063581 1.3132719347 -0.0064059252  
C 1.0665647871 0.1054678536 -0.0045803191  
C 0.4258689674 -1.1534485943 0.0002191687  
O -2.9804914804 0.0102241381 0.0044602458  
O -1.7655287931 2.3619676536 -0.0047179378  
C 2.549639638 0.1018070106 -0.0076637974  
O 3.0947505998 1.3403885631 -0.0126934726  
O -1.6538137028 -2.3635376865 0.0077097253  
O 3.2491053834 -0.8855446233 -0.0057472346  
H 1.0383091353 -2.0498423758 0.0013443265  
H 0.8701502831 2.2667746551 -0.0101943168  
H -1.073667447 -3.1302452208 0.0082709411  
H -2.6967940029 2.0724469809 -0.0020810063  
H 4.0490438263 1.2038359203 -0.0142549843

ωB97 Gallic Acid (Radical) 0.008 a.u.

C -0.9434609807 -1.2333978927 0.0032889474  
C -1.7528343345 -0.0080246113 0.0018350958  
C -1.0191820285 1.2666635866 -0.0033340985  
C 0.3584568422 1.3115535497 -0.0064055431  
C 1.0682298433 0.1034170073 -0.0045246919  
C 0.4269211438 -1.1566663599 0.0002730138  
O -2.978764236 0.0078225035 0.0044222904  
O -1.7619647128 2.362383494 -0.0047573662

C 2.5477306404 0.1039944055 -0.0075993351  
O 3.0930978989 1.3455521263 -0.0127506214  
O -1.6559985312 -2.3627163492 0.0076756693  
O 3.2579919908 -0.8780070254 -0.0057096535  
H 1.0379753568 -2.0539426513 0.0013838497  
H 0.8695510286 2.2655903458 -0.010242525  
H -1.0826775542 -3.1345576921 0.0081641345  
H -2.6960929102 2.0803075165 -0.0020764953  
H 4.0461125434 1.2031510467 -0.014347671

ωB97XD Caffeic Acid (Neutral) -0.010 a.u.

C 1.2565618626 0.0611430417 -0.7143536483  
C 0.0471514096 -0.1450515764 -0.0578933758  
C 0.0225962559 -0.2408490908 1.3194608299  
C 1.1991571873 -0.130386074 2.0643748753  
C 2.4005627302 0.0661938073 1.3849522173  
C 2.4299576463 0.163625236 0.0037856908  
O -1.108764221 -0.253629141 -0.7726695277  
C 1.239157991 -0.2057524332 3.5272235998  
C 0.2169630151 -0.1931678809 4.3751599837  
C 0.5056060371 -0.2595646181 5.8377246103  
O -0.6166476972 -0.2180049572 6.5545805844  
O 1.2029271164 0.1467448181 -2.0957016082  
O 1.6088197827 -0.3377276659 6.2983735246  
H 2.227879162 -0.256887041 3.9736619684  
H -0.8209173502 -0.1233416621 4.0754650787  
H -0.3879578499 -0.2558000763 7.4930092931  
H 2.0679918485 0.4083163129 -2.4065355977  
H -0.8894251719 -0.1355530761 -1.6980214279  
H 3.3722386378 0.3196827606 -0.5117984164  
H 3.3204801433 0.1500405012 1.9477404295  
H -0.9292275355 -0.4063591846 1.8060449163

ωB97XD Caffeic Acid (Neutral) -0.002 a.u.

C 1.2625079987 0.0478349989 -0.7125176663  
C 0.0454123919 -0.0692068654 -0.0351117257  
C 0.0335574534 -0.117893287 1.3418395689  
C 1.2247950263 -0.0514733528 2.0699358222  
C 2.4261379809 0.0669260667 1.3777411972  
C 2.4466978577 0.1153754877 -0.0079226865  
O -1.1182991655 -0.1331585818 -0.7232918183  
C 1.2639663353 -0.0989372901 3.5302206539  
C 0.2396812429 -0.2515810382 4.3674037164  
C 0.4853687329 -0.2708585224 5.8223542596  
O -0.6570986025 -0.4306906079 6.5123886085  
O 1.1751675286 0.0894431718 -2.0750366177

O 1.5562499207 -0.1601534856 6.3582528328  
H 2.2462218657 0.0024340857 3.9819979768  
H -0.7855079341 -0.3669193512 4.0432651069  
H -0.4251710283 -0.4329623901 7.447810289  
H 2.0474665211 0.1750572107 -2.4583519592  
H -0.9227493281 -0.0827336571 -1.6619141539  
H 3.3877461762 0.2078807616 -0.5378226632  
H 3.356807076 0.1215502858 1.9267128464  
H -0.9238470498 -0.2062616393 1.8366304125

ωB97XD Caffeic Acid (Neutral) -0.004 a.u.

C 1.2614361855 0.0464301402 -0.7134021962  
C 0.0442173432 -0.0702417778 -0.0397228417  
C 0.0284909614 -0.1186754965 1.3378967579  
C 1.2174190016 -0.0527010805 2.0690726281  
C 2.4203580313 0.0653816828 1.3789920791  
C 2.443943674 0.1136884173 -0.0063484738  
O -1.1190774275 -0.1338582321 -0.7333344238  
C 1.2564475754 -0.0992912328 3.5309015802  
C 0.2348185636 -0.2538676334 4.368926049  
C 0.4905895461 -0.2706078979 5.8265340232  
O -0.6457439152 -0.4283123672 6.5213397297  
O 1.1828410547 0.0886020325 -2.0810044175  
O 1.5681840657 -0.1590474983 6.3453126439  
H 2.2384454426 0.0045364834 3.9826737023  
H -0.7917669021 -0.3717630812 4.0493108878  
H -0.4157092726 -0.4293438048 7.4578803723  
H 2.0603269579 0.1826565279 -2.4493757079  
H -0.9166262511 -0.0799446518 -1.6697414845  
H 3.3868270317 0.2061218315 -0.5336785755  
H 3.349318029 0.1199632761 1.9307064399  
H -0.9296286951 -0.2060536372 1.8316452275

ωB97XD Caffeic Acid (Neutral) -0.006 a.u.

C 1.2606236798 0.045547123 -0.7143481205  
C 0.0429596591 -0.0720079362 -0.0449565696  
C 0.022691381 -0.1212562072 1.3332280706  
C 1.2090230511 -0.0552983332 2.0682320256  
C 2.4138389195 0.0635405591 1.3805680338  
C 2.4411148063 0.1127069564 -0.0042971795  
O -1.1194828295 -0.1354270661 -0.7448524171  
C 1.2480111878 -0.1012722926 3.5311225818  
C 0.2291180116 -0.2553631154 4.3709500473  
C 0.4962540453 -0.2700248668 5.8307424524  
O -0.6332973134 -0.4237708361 6.5316017632  
O 1.1912515924 0.089380873 -2.0870851355

O 1.5810681714 -0.1589981003 6.3316398198  
H 2.2301001331 0.0030443312 3.9825831399  
H -0.7994396228 -0.3736074718 4.0570409515  
H -0.4037937292 -0.4237325978 7.4690101226  
H 2.0738164764 0.1922207111 -2.4399877994  
H -0.9092865009 -0.077399545 -1.6788382689  
H 3.3859723364 0.2059941539 -0.528659715  
H 3.3408314399 0.1182908877 1.9354179047  
H -0.9362638952 -0.208895227 1.8254722924

ωB97XD Caffeic Acid (Neutral) -0.008 a.u.

C 1.2600452182 0.0445175932 -0.7155425645  
C 0.0418580451 -0.0770667678 -0.0509570793  
C 0.0165747224 -0.1289663505 1.3277224065  
C 1.1999501467 -0.0615424051 2.0672944889  
C 2.4068019082 0.0607451047 1.3823337847  
C 2.4382308224 0.1125049097 -0.0018867001  
O -1.1192392198 -0.1414974579 -0.7578643582  
C 1.2390219595 -0.1074629602 3.5308700635  
C 0.2226268496 -0.2555104028 4.3736563413  
C 0.5024528686 -0.2687644496 5.8352636809  
O -0.620562243 -0.4108514806 6.5433735192  
O 1.2005412374 0.0919099222 -2.0933703399  
O 1.5954064252 -0.1647328131 6.3171580123  
H 2.2219284748 -0.007212651 3.9815548813  
H -0.8087866144 -0.3685665321 4.0663869055  
H -0.3906370011 -0.4104066323 7.4814630125  
H 2.0866950693 0.2152778793 -2.4297555384  
H -0.901174148 -0.0745302305 -1.6890076426  
H 3.3851238509 0.2086356366 -0.5228314407  
H 3.3315008328 0.1165927989 1.9407731822  
H -0.9432482047 -0.219400711 1.8179493851

ωB97XD Gallic Acid (Neutral) -0.010 a.u.

C -0.9524086356 -1.1558917552 0.0021391585  
C -1.6894532404 0.0181443987 0.0003857233  
C -1.0454887611 1.2462205497 -0.0039567498  
C 0.3391234794 1.301655915 -0.0065431361  
C 1.0643549827 0.1185456814 -0.0047214753  
C 0.4233898062 -1.1146683051 -0.0003653079  
O -3.0635914284 -0.0063011166 0.0028762923  
O -1.7804574338 2.3919775493 -0.0056282651  
C 2.5624330182 0.0824411271 -0.0072152685  
O 3.1120246182 1.2951936271 -0.0116030013  
O -1.6926366478 -2.3119246298 0.0063676682  
O 3.1829029731 -0.9419237396 -0.0056100544



H 1.0250655864 -2.0156559506 0.0009274636  
H 0.8399417123 2.2586696983 -0.0099474391  
H -1.0986397483 -3.0635943381 0.0079810792  
H -3.3211098643 -0.9310565021 0.0060286721  
H -2.7068329831 2.1454783642 -0.0030119482  
H 4.0729435663 1.1939144263 -0.0128094116

ωB97XD Gallic Acid (Neutral) -0.002 a.u.

C -0.9512981742 -1.1685566628 0.0023017005  
C -1.6885807936 0.0085502416 0.0005735352  
C -1.0411334856 1.237874738 -0.0037695699  
C 0.3427083578 1.2892162551 -0.0063682249  
C 1.0686646791 0.1055465734 -0.0045451514  
C 0.4264808165 -1.1284219603 -0.0001759601  
O -3.0475047048 0.0049813948 0.0029353954  
O -1.7604218302 2.3834806468 -0.0054816875  
C 2.5539548926 0.0915020597 -0.0071496753  
O 3.0961646266 1.3178720837 -0.0120161096  
O -1.6935303198 -2.3143828731 0.0064182708  
O 3.2210958476 -0.9085321563 -0.0053273052  
H 1.0192354638 -2.0343525981 0.0011214528  
H 0.8376230914 2.2485802103 -0.0098586876  
H -1.1181825676 -3.0793828017 0.0075822589  
H -3.3516637879 -0.9060097008 0.0056671152  
H -2.6945580195 2.1611044741 -0.0033241859  
H 4.052506908 1.2021550756 -0.0132891712

ωB97XD Gallic Acid (Neutral) -0.004 a.u.

C -0.9516035177 -1.1652895789 0.0022663239  
C -1.6886645034 0.0109988025 0.000533533  
C -1.0421716795 1.2399192753 -0.0038108279  
C 0.3418612551 1.292246985 -0.0064090071  
C 1.0673440945 0.1087260916 -0.0045882236  
C 0.4256844701 -1.1249899901 -0.0002211957  
O -3.0513696052 0.0020922797 0.002925812  
O -1.7651455796 2.3856524637 -0.0055148406  
C 2.5558619555 0.0892156285 -0.0071706553  
O 3.0997735595 1.3121721566 -0.0119139505  
O -1.6933573166 -2.3136148571 0.0064079653  
O 3.2113238771 -0.9169898023 -0.0053984687  
H 1.0206510699 -2.0296645684 0.0010736497  
H 0.8383000309 2.250973829 -0.0098798036  
H -1.1132950511 -3.0752824569 0.0076799029  
H -3.3434752714 -0.9126616625 0.005742316  
H -2.6973962756 2.157399014 -0.0032578632  
H 4.0572394875 1.2003213903 -0.0131706666

ωB97XD Gallic Acid (Neutral) -0.006 a.u.

|   |               |               |               |
|---|---------------|---------------|---------------|
| C | -0.9518833055 | -1.1620997145 | 0.0022272592  |
| C | -1.6888329844 | 0.0134083689  | 0.0004891917  |
| C | -1.0432449803 | 1.2419966485  | -0.0038554545 |
| C | 0.3409743533  | 1.2953505028  | -0.0064517322 |
| C | 1.0661815901  | 0.111970518   | -0.0046321611 |
| C | 0.4249095204  | -1.1215406602 | -0.0002683159 |
| O | -3.0553281807 | -0.0007322308 | 0.0029131987  |
| O | -1.770081355  | 2.3877841589  | -0.0055496379 |
| C | 2.5578907263  | 0.086935215   | -0.0071878829 |
| O | 3.1036324611  | 1.3064722868  | -0.0118136643 |
| O | -1.6931273367 | -2.3129691755 | 0.006395643   |
| O | 3.2016535563  | -0.925407082  | -0.0054647175 |
| H | 1.0221559346  | -2.0249403945 | 0.001024363   |
| H | 0.8389034242  | 2.2534740027  | -0.0099015041 |
| H | -1.1083731473 | -3.0712954051 | 0.0077783406  |
| H | -3.3356926414 | -0.9190091568 | 0.0058269704  |
| H | -2.7004076206 | 2.1535330454  | -0.0031834105 |
| H | 4.0622309856  | 1.1982940722  | -0.0130524858 |

ωB97XD Gallic Acid (Neutral) -0.008 a.u.

|   |               |               |               |
|---|---------------|---------------|---------------|
| C | -0.9521515712 | -1.1590045724 | 0.0021846966  |
| C | -1.6890985884 | 0.0157611191  | 0.0004403354  |
| C | -1.0443430194 | 1.2440704332  | -0.0039041953 |
| C | 0.3400629414  | 1.2984826902  | -0.0064974228 |
| C | 1.0651884321  | 0.1152423519  | -0.0046779153 |
| C | 0.424147585   | -1.1181000473 | -0.0003175912 |
| O | -3.0594067005 | -0.0034119525 | 0.0028975964  |
| O | -1.7751918783 | 2.3898550819  | -0.0055870157 |
| C | 2.5600731314  | 0.0846745568  | -0.0072040039 |
| O | 3.1077127919  | 1.3008124591  | -0.0117105661 |
| O | -1.6928026881 | -2.3124954572 | 0.0063825633  |
| O | 3.1921689154  | -0.9337257115 | -0.005531553  |
| H | 1.0236539119  | -2.0202572542 | 0.000973454   |
| H | 0.8394429607  | 2.2560394313  | -0.009925198  |
| H | -1.1033307084 | -3.0674327526 | 0.0078786081  |
| H | -3.3284695297 | -0.9249391988 | 0.0059231195  |
| H | -2.703555679  | 2.1495009976  | -0.003100805  |
| H | 4.0674606933  | 1.1961528254  | -0.012930107  |

ωB97XD Caffeic Acid (Radical) -0.010 a.u.

|   |               |               |               |
|---|---------------|---------------|---------------|
| C | 1.256734821   | 0.055319813   | -0.763364758  |
| C | 0.0031768551  | -0.079981503  | -0.0187963928 |
| C | -0.0364439529 | -0.1375482345 | 1.3435155153  |
| C | 1.1652822324  | -0.0634717415 | 2.0761781279  |

C 2.400862689 0.0716106893 1.3694624684  
C 2.4589854118 0.128554802 0.0147369758  
O -1.0912009744 -0.1417403031 -0.7833733958  
C 1.2321084521 -0.1144830119 3.5111072326  
C 0.210219738 -0.2460324273 4.3731169183  
C 0.5113499838 -0.2747581981 5.8369584196  
O -0.6009523432 -0.3944429347 6.5532281514  
O 1.195658992 0.0952469804 -2.009473786  
O 1.621233574 -0.1975370496 6.2797037479  
H 2.2184019815 -0.0371674106 3.9583430201  
H -0.8263080782 -0.3341081496 4.0746598351  
H -0.3759894441 -0.4055922069 7.4939523887  
H -0.7430275084 -0.0742160205 -1.6886595011  
H 3.4000376223 0.232115864 -0.5084458725  
H 3.3103507862 0.12858745 1.9539339998  
H -0.9888288379 -0.2378374073 1.8449899055

ωB97XD Caffeic Acid (Radical) -0.002 a.u.

C 1.2520478351 0.0509374367 -0.7633211331  
C 0.0001766911 -0.0759420508 -0.0058309643  
C -0.0179453356 -0.1279744242 1.3618923336  
C 1.1899822283 -0.0569064876 2.0711061577  
C 2.4210459035 0.0688476244 1.3581999029  
C 2.4680709784 0.1200145083 0.004013171  
O -1.1025550607 -0.1349021513 -0.7385365059  
C 1.2577552709 -0.1033364898 3.5137699804  
C 0.2335720483 -0.2470350225 4.3652434617  
C 0.4936752732 -0.2701681377 5.8210146333  
O -0.641986441 -0.421054995 6.5178118864  
O 1.1808840002 0.0900576319 -1.9974727716  
O 1.5742619219 -0.1682323152 6.3357333752  
H 2.2446202885 -0.012078823 3.9564185218  
H -0.7952654564 -0.3521706107 4.0497534629  
H -0.4094588369 -0.4272924615 7.4534128766  
H -0.798760442 -0.077358795 -1.6611971057  
H 3.4008101819 0.2150224334 -0.534428398  
H 3.3372360635 0.122558736 1.9326422822  
H -0.9665151122 -0.2204666064 1.8715478327

ωB97XD Caffeic Acid (Radical) -0.004 a.u.

C 1.2528319849 0.0513202032 -0.7632466935  
C 0.0009411214 -0.0765403866 -0.0083252733  
C -0.0216314333 -0.1295295915 1.3582667023  
C 1.1849088759 -0.0581066169 2.072048161  
C 2.4167302689 0.0692475877 1.3604025279

C 2.4659129413 0.1213558562 0.0060755906  
O -1.100384563 -0.1358151279 -0.7477275636  
C 1.2524510198 -0.1052662021 3.5138585097  
C 0.228845161 -0.2472674063 4.3663075691  
C 0.4974984969 -0.2710788091 5.8246780156  
O -0.6330824757 -0.4161015017 6.5248442188  
O 1.1836551578 0.0908751254 -2.0001868446  
O 1.5847921969 -0.1732991311 6.3229971352  
H 2.2389550397 -0.0161302977 3.9577843583  
H -0.8015437812 -0.3498193085 4.0542741604  
H -0.4037931088 -0.4231944157 7.4619703464  
H -0.786524953 -0.0766035534 -1.666565968  
H 3.4004640682 0.2180111662 -0.5290883691  
H 3.3315055598 0.1236409657 1.9369240206  
H -0.9708795774 -0.2231795559 1.8664823963

ωB97XD Caffeic Acid (Radical) -0.006 a.u.

C 1.2538634602 0.0521748988 -0.7632133229  
C 0.0016546529 -0.0774225185 -0.0112257512  
C -0.0259595606 -0.1316532898 1.354061646  
C 1.1791242889 -0.0595960891 2.0732278281  
C 2.4119515437 0.0698572656 1.3629643187  
C 2.4637052145 0.1232120374 0.0085299552  
O -1.0978146119 -0.1372341639 -0.7581531487  
C 1.2464928991 -0.1077280433 3.5134357261  
C 0.2234902116 -0.2473633969 4.3679235446  
C 0.5017006459 -0.2722262621 5.8284727624  
O -0.6234360128 -0.4097396835 6.5329457129  
O 1.1869840191 0.0920575204 -2.0030410084  
O 1.5961087499 -0.1801577213 6.3095029277  
H 2.2327674349 -0.0214443683 3.9585444139  
H -0.8086899471 -0.3464799031 4.0599003157  
H -0.3964690554 -0.4178848659 7.4714155167  
H -0.7731619291 -0.0757815838 -1.6728297508  
H 3.4002374223 0.2218422076 -0.5230185356  
H 3.3251421191 0.1250438512 1.9418375792  
H -0.9760395452 -0.2269568914 1.8604922705

ωB97XD Caffeic Acid (Radical) -0.008 a.u.

C 1.2551612364 0.0533002733 -0.7632498301  
C 0.0023550349 -0.0785482838 -0.0146160476  
C -0.0308923767 -0.1341769819 1.3492175243  
C 1.1726488284 -0.0612819953 2.0746172068  
C 2.4067053926 0.0707057044 1.3659370489  
C 2.4614144659 0.1255546468 0.011381352  
O -1.0948299155 -0.1391870706 -0.7698730833

C 1.2397793102 -0.1106455975 3.5125063318  
C 0.2173646966 -0.2472557066 4.3701005308  
C 0.5062720195 -0.2736487585 5.832480553  
O -0.6128647196 -0.401995726 6.5422928442  
O 1.1909517419 0.0936736785 -2.0061007967  
O 1.6082511761 -0.1890794787 6.2950516733  
H 2.2259236152 -0.0279823357 3.9587916051  
H -0.8168075865 -0.3420220645 4.0665402188  
H -0.3873846262 -0.4115171022 7.4819656002  
H -0.7586700968 -0.0751930961 -1.6800210134  
H 3.4000987388 0.2265220427 -0.5161971022  
H 3.3181453151 0.1268318174 1.9474275413  
H -0.9819702504 -0.2315349655 1.853520843

$\omega$ B97XD Gallic Acid (Radical) -0.010 a.u.

C -0.9470804191 -1.2051425427 0.0031065045  
C -1.74915265 0.0019131634 0.0014482671  
C -1.019252223 1.26693503 -0.003313314  
C 0.3508564486 1.3294455251 -0.0063649602  
C 1.059778956 0.1278919748 -0.0046612613  
C 0.4159949246 -1.1210962896 0.0001030675  
O -2.9938839228 0.031487863 0.0038514171  
O -1.7947608574 2.3507332141 -0.0045299432  
C 2.561601896 0.0841679946 -0.0077636021  
O 3.1119770501 1.2934312456 -0.0125668672  
O -1.6289702684 -2.3643438772 0.0076382071  
O 3.1683360978 -0.9476422374 -0.005975512  
H 1.0409083309 -2.0066546832 0.0012319652  
H 0.8668129117 2.2779484353 -0.0099885619  
H -1.002153669 -3.0916097038 0.0087644137  
H -2.6999154825 1.9978374902 -0.0016604056  
H 4.0739948765 1.1978203978 -0.0140244148

$\omega$ B97XD Gallic Acid (Radical) -0.002 a.u.

C -0.9457032051 -1.214670679 0.0031515694  
C -1.7475649346 -0.0019281858 0.0016034167  
C -1.0175927779 1.2643628359 -0.0032597048  
C 0.3546083063 1.3193178904 -0.0063015751  
C 1.0613428549 0.1168694705 -0.0045211901  
C 0.4200853043 -1.1332814433 0.0002036754  
O -2.9831657304 0.0245494869 0.0040598801  
O -1.7761530781 2.3511181213 -0.0045510767  
C 2.5516805633 0.0921607273 -0.0075262232  
O 3.0982074173 1.3131392649 -0.0130018787  
O -1.636519136 -2.3598525461 0.0075034455  
O 3.2025729783 -0.9171667655 -0.0053900594

H 1.0368964894 -2.0234492748 0.0013216914  
H 0.8668122302 2.2691725086 -0.0100026114  
H -1.0322970309 -3.1051154658 0.0083124492  
H -2.6933189494 2.0281162569 -0.0018502109  
H 4.0552006983 1.1997807974 -0.0144565973

ωB97XD Gallic Acid (Radical) -0.004 a.u.

C -0.9460921763 -1.2122692212 0.0031346317  
C -1.7478943759 -0.0009814613 0.0015590053  
C -1.0179615186 1.2648587727 -0.0032685009  
C 0.3537319538 1.3215980315 -0.0063094547  
C 1.0607276564 0.1194273604 -0.0045489057  
C 0.4190472121 -1.1302788852 0.0001761023  
O -2.9857098582 0.0262306761 0.0039978966  
O -1.7803933876 2.351119293 -0.0045385197  
C 2.5540477462 0.0901131833 -0.0075593599  
O 3.1012040974 1.3082238199 -0.0129266411  
O -1.6345223582 -2.3610409194 0.0075262996  
O 3.1940185362 -0.9247946913 -0.0054877632  
H 1.0376663894 -2.0193973433 0.0012951082  
H 0.8668688642 2.2710885852 -0.0099840699  
H -1.0243585482 -3.1016498848 0.0084190193  
H -2.6947462038 2.0211331756 -0.0018012314  
H 4.0594579711 1.1997425091 -0.0143886164

ωB97XD Gallic Acid (Radical) -0.006 a.u.

C -0.9464567539 -1.2099015094 0.0031260715  
C -1.7482537818 -0.0000320462 0.0015321845  
C -1.018324073 1.2654152773 -0.0032864958  
C 0.3528478332 1.3239719515 -0.0063490255  
C 1.0602994348 0.1220290644 -0.0046123668  
C 0.4180113243 -1.1273314382 0.0001346123  
O -2.9883428938 0.0278772579 0.0039693551  
O -1.7847378169 2.3511140628 -0.004533029  
C 2.5564058594 0.088166988 -0.0076674419  
O 3.1043562823 1.3035030933 -0.0128016996  
O -1.6326483792 -2.3621855245 0.0075737076  
O 3.1856170901 -0.9322376235 -0.0056064615  
H 1.0384385235 -2.0154188261 0.0012487601  
H 0.8669480673 2.2730983167 -0.0100155826  
H -1.0167641552 -3.0982650855 0.0085382374  
H -2.6961555196 2.0138598129 -0.0017387261  
H 4.0638509585 1.1994592286 -0.0142170997

ωB97XD Gallic Acid (Radical) -0.008 a.u.

C -0.946798128 -1.2075440466 0.0031159858

C -1.7486911851 0.0009224275 0.0014909675  
C -1.0187419174 1.2660949609 -0.0032996452  
C 0.3519033134 1.3265410329 -0.0063587746  
C 1.0600001913 0.1248052219 -0.0046392418  
C 0.4169841877 -1.1243032867 0.0001164473  
O -2.9910697932 0.0296445965 0.0039115603  
O -1.7894966307 2.3509839637 -0.0045305139  
C 2.5589875694 0.0861857736 -0.0077176348  
O 3.1079177655 1.2985926113 -0.0126873495  
O -1.6308152315 -2.3632933528 0.0076060971  
O 3.1771689136 -0.9398161909 -0.0057796491  
H 1.0394087094 -2.0112682758 0.0012371262  
H 0.8669444716 2.2753379138 -0.0100042698  
H -1.0093967628 -3.0949371304 0.008651153  
H -2.6978918942 2.0062015035 -0.0016980394  
H 4.068678421 1.1989752774 -0.0141192189

ωB97XD Caffeic Acid (Neutral) Zero field

C 1.2635438692 0.0489406343 -0.7119688929  
C 0.0464263879 -0.0688151117 -0.030744459  
C 0.0383586238 -0.1176910359 1.345536285  
C 1.2319406809 -0.0505385262 2.0709135166  
C 2.4318288781 0.0684416281 1.3764295428  
C 2.4494592418 0.117009835 -0.009514277  
O -1.1174773392 -0.1333671729 -0.7137714793  
C 1.2714365495 -0.0988114547 3.5293348268  
C 0.2446016013 -0.2489097362 4.3664616184  
C 0.4805848998 -0.2710004186 5.8186730775  
O -0.6685470762 -0.4316467233 6.5039034886  
O 1.1680077853 0.0899560802 -2.0692364547  
O 1.5446465562 -0.1629865758 6.3715091803  
H 2.2542974837 -0.0006042165 3.9806645394  
H -0.7792204383 -0.3608011264 4.0374999563  
H -0.4349801305 -0.4357549373 7.4382621294  
H 2.0346395973 0.1702690927 -2.4672102003  
H -0.9290194528 -0.0858775461 -1.6545137096  
H 3.3888079107 0.2097702426 -0.5417788042  
H 3.3641432087 0.1233317353 1.9227938751  
H -0.9183678371 -0.2072426666 1.8413402407

ωB97XD Caffeic Acid (Neutral) 0.010 a.u.

C 1.2714538641 0.0521034032 -0.7122390649  
C 0.0481713998 -0.069763606 -0.0175210758  
C 0.0509124937 -0.1197026173 1.3552172244  
C 1.2536457669 -0.0488068106 2.0775634865  
C 2.4523270677 0.0737821119 1.3720618016

C 2.4645282757 0.1228885412 -0.0120951166  
O -1.1110277488 -0.1367846277 -0.6843397462  
C 1.2966281387 -0.0991365231 3.5185277644  
C 0.2606242727 -0.2379755315 4.3703691338  
C 0.4630630998 -0.2708410261 5.801749219  
O -0.7133095741 -0.4293101471 6.4803414474  
O 1.1467193863 0.0904460076 -2.0424256134  
O 1.4980368068 -0.1789028515 6.4308570741  
H 2.2837394717 -0.0146282485 3.9651362921  
H -0.758867724 -0.3362789274 4.0263667859  
H -0.4542522821 -0.4419219306 7.4052606574  
H 1.9831679325 0.163580107 -2.5079313122  
H -0.9530118067 -0.0968918502 -1.6340750904  
H 3.3981338658 0.2167962538 -0.5519286572  
H 3.3892052845 0.1300487917 1.9118402514  
H -0.9047769908 -0.2150285187 1.8518485386

ωB97XD Caffeic Acid (Neutral) 0.002 a.u.

C 1.2647661322 0.0498114047 -0.7116158169  
C 0.047263687 -0.0688172085 -0.0269562128  
C 0.0424368714 -0.117949614 1.3486662286  
C 1.2381706586 -0.0499874434 2.0719913927  
C 2.4369700303 0.0697275103 1.3752976557  
C 2.452271462 0.1184565803 -0.0107532099  
O -1.1164497531 -0.1339932691 -0.7054634236  
C 1.2781134051 -0.0989237492 3.5280691971  
C 0.2490050509 -0.2464243714 4.3660903669  
C 0.4762514237 -0.2710435625 5.8151160833  
O -0.679181071 -0.4316829435 6.496600445  
O 1.1617978834 0.0903151402 -2.0636061032  
O 1.5337849485 -0.1661525963 6.3842933601  
H 2.2616905026 -0.0038402212 3.9787428893  
H -0.7736110089 -0.3550052438 4.0329002941  
H -0.4429021745 -0.43753272 7.4296634719  
H 2.0225139467 0.1675711092 -2.4758164295  
H -0.934766577 -0.0885659998 -1.6481886548  
H 3.3900942467 0.211523739 -0.5450964662  
H 3.3706767625 0.1249362689 1.9194932703  
H -0.913785427 -0.2087508098 1.845155662

ωB97XD Caffeic Acid (Neutral) 0.004 a.u.

C 1.2661743899 0.0503878002 -0.7114536117  
C 0.0478909598 -0.0688372279 -0.0237832326  
C 0.0456861082 -0.1180393402 1.3512128127  
C 1.2433687079 -0.0493974516 2.0731826947  
C 2.4415224284 0.0708705992 1.3743355823



C 2.4551773678 0.1195468521 -0.0116127179  
O -1.1152683108 -0.1345084318 -0.6983861934  
C 1.2838554202 -0.098810938 3.5264022896  
C 0.2528031831 -0.2443847837 4.3662855623  
C 0.4723845044 -0.2710786414 5.8116427728  
O -0.6888195965 -0.4317329562 6.4905561099  
O 1.1566682742 0.090253722 -2.0581623878  
O 1.5237282031 -0.1689606036 6.3964671685  
H 2.2681518135 -0.0061796971 3.9763194401  
H -0.7687206279 -0.350527069 4.0295148747  
H -0.4486161678 -0.4390956115 7.4220329192  
H 2.0113648053 0.1656470379 -2.4841785848  
H -0.9400218717 -0.090749984 -1.6429825943  
H 3.3916776018 0.2127111431 -0.547733652  
H 3.3763378636 0.1263371442 1.9168666688  
H -0.9102340565 -0.2097795626 1.848058079

ωB97XD Caffeic Acid (Neutral) 0.006 a.u.

C 1.2677704941 0.0510125978 -0.7114674478  
C 0.0482870742 -0.0690807998 -0.021138983  
C 0.0482026647 -0.1185393492 1.3531527965  
C 1.247693073 -0.049126522 2.0744896832  
C 2.4455802378 0.0719100133 1.3735274244  
C 2.4581538332 0.1207245314 -0.0121088723  
O -1.1139330476 -0.1352557929 -0.6925229936  
C 1.2888058804 -0.09897143 3.5242592239  
C 0.2559399414 -0.2422178734 4.3669880556  
C 0.4689221659 -0.2710273096 5.808214465  
O -0.6976337476 -0.4311394999 6.4858149678  
O 1.1523756464 0.0903846735 -2.0528025572  
O 1.5144587252 -0.1721343034 6.4081503724  
H 2.2739349936 -0.0091231283 3.9732903486  
H -0.7647421469 -0.3456002728 4.0272909443  
H -0.452355344 -0.4401389778 7.4154379378  
H 2.0010221286 0.1645444384 -2.4922545264  
H -0.9446619995 -0.0928944197 -1.6388889625  
H 3.3935105088 0.2141502187 -0.549721542  
H 3.3813040034 0.1276684757 1.9147448268  
H -0.9075240852 -0.2114732701 1.8501288382

ωB97XD Caffeic Acid (Neutral) 0.008 a.u.

C 1.2695428167 0.0515807461 -0.7117134599  
C 0.0483954375 -0.0693793951 -0.0190671542  
C 0.0499329361 -0.1190749049 1.3544787688  
C 1.2510973251 -0.0489108696 2.0759440408  
C 2.4491589699 0.0728842876 1.372810927

C 2.4612605627 0.1218321342 -0.0122510847  
O -1.1124941645 -0.1359956732 -0.6878853363  
C 1.2929933519 -0.0990679024 3.5216438043  
C 0.2584930018 -0.2401046063 4.368319595  
C 0.4658526569 -0.2709561903 5.8048908049  
O -0.7057118557 -0.430341938 6.4824185127  
O 1.1490534173 0.0904358227 -2.0475482289  
O 1.5059626678 -0.1754477454 6.4194814438  
H 2.2790383281 -0.0119077812 3.9696304014  
H -0.76152231 -0.3409082078 4.0262598298  
H -0.4541304599 -0.4410698556 7.4098599947  
H 1.991621203 0.1638024374 -2.5001392236  
H -0.9489327866 -0.0949171868 -1.6359578112  
H 3.3956622888 0.2154962064 -0.5510826426  
H 3.3855644666 0.1289093064 1.9131232276  
H -0.9057268537 -0.2131866843 1.8513675907

ωB97XD Gallic Acid (Neutral) Zero field

C -0.9509436934 -1.1717750651 0.0023342236  
C -1.6885464961 0.0061650254 0.0006098978  
C -1.0401437563 1.2359726907 -0.003733356  
C 0.3435057593 1.2863041921 -0.0063332863  
C 1.0701356093 0.1024582115 -0.0045074181  
C 0.427293133 -1.1318276445 -0.0001341669  
O -3.0436741829 0.0075207559 0.0029451632  
O -1.7559081041 2.3814036634 -0.0054526888  
C 2.5521231809 0.0938030513 -0.0071354548  
O 3.0928065131 1.3235792811 -0.012106563  
O -1.6939397768 -2.3149575616 0.0064296213  
O 3.2309343323 -0.9000358673 -0.005264286  
H 1.0178918991 -2.0389997675 0.0011657023  
H 0.8369119477 2.2463128742 -0.0098440495  
H -1.1235944821 -3.083475962 0.0074905291  
H -3.3594106237 -0.899774066 0.0056055534  
H -2.6919012384 2.164827235 -0.0033838225  
H 4.0480209791 1.2037239532 -0.0133915987

ωB97XD Gallic Acid (Neutral) 0.010 a.u.

C -0.948337384 -1.1891095218 0.0024697327  
C -1.6895823004 -0.0061363611 0.0007609901  
C -1.0356909007 1.2275363618 -0.0035987111  
C 0.3466754172 1.2731066067 -0.0061979484  
C 1.080251866 0.0882059754 -0.0043365613  
C 0.4316524057 -1.1486013704 0.000061677  
O -3.0253020186 0.019680823 0.00298746  
O -1.7364738636 2.370980476 -0.0053494964

C 2.544321558 0.105279054 -0.0070319616  
O 3.0796880847 1.3522673096 -0.0124997094  
O -1.6956485043 -2.3188982446 0.0064836463  
O 3.2815062013 -0.8575775719 -0.0049953437  
H 1.0128534696 -2.0614854177 0.0013698806  
H 0.8322083099 2.2367811568 -0.0098118375  
H -1.1517889452 -3.1055788469 0.0070267064  
H -3.4025768962 -0.8658286157 0.0054296267  
H -2.6813300096 2.1821079326 -0.0036208766  
H 4.0291345101 1.2084952542 -0.0138532737

ωB97XD Gallic Acid (Neutral) 0.002 a.u.

C -0.9505504786 -1.1750387067 0.0023647603  
C -1.6885896148 0.0037745958 0.0006428465  
C -1.0391866631 1.2341310467 -0.0037011918  
C 0.3442610329 1.2834574794 -0.0063017011  
C 1.0717782142 0.0994247873 -0.0044719808  
C 0.428113586 -1.1352364062 -0.0000936539  
O -3.0399221829 0.0099953955 0.0029525037  
O -1.7515823171 2.3793411025 -0.0054277174  
C 2.5504099442 0.0961163229 -0.0071233899  
O 3.0896753536 1.3293045581 -0.0121859321  
O -1.694381098 -2.3155597796 0.0064416332  
O 3.2409167724 -0.8914852254 -0.0052138046  
H 1.0165746374 -2.0436572781 0.0012090685  
H 0.8361516309 2.2441299802 -0.0098327491  
H -1.1291399285 -3.0876389981 0.0074043946  
H -3.3673290017 -0.8934547954 0.0055540387  
H -2.689403812 2.1684780149 -0.0034384505  
H 4.0437649251 1.2051429062 -0.0134846744

ωB97XD Gallic Acid (Neutral) 0.004 a.u.

C -0.9501290194 -1.178513814 0.0023938473  
C -1.6887571999 0.0012555623 0.0006740736  
C -1.0382416061 1.232236187 -0.0036718178  
C 0.344980483 1.2806234965 -0.0062726302  
C 1.0736245493 0.0964153184 -0.0044377393  
C 0.4289526063 -1.1386608574 -0.0000538809  
O -3.036279858 0.0128524685 0.0029588987  
O -1.7474385099 2.3771376941 -0.0054048729  
C 2.548846165 0.0984270243 -0.0071091363  
O 3.0867567181 1.3350565561 -0.0122634063  
O -1.6945111226 -2.316547779 0.006453891  
O 3.2510867937 -0.8828928937 -0.0051632546  
H 1.0153206909 -2.0483281358 0.0012519822  
H 0.8352885043 2.2420120487 -0.0098241051

H -1.134205213 -3.0920337651 0.0073150664  
H -3.3764095927 -0.8861899406 0.0055113405  
H -2.6870547345 2.1718746935 -0.003488804  
H 4.0397313454 1.2065011364 -0.0135754524

ωB97XD Gallic Acid (Neutral) 0.006 a.u.

C -0.9496448563 -1.182088497 0.0024208234  
C -1.6889966426 -0.0013038831 0.0007043709  
C -1.0373235774 1.2304209949 -0.0036455213  
C 0.3456434222 1.2779045953 -0.0062470865  
C 1.0756652841 0.0935042418 -0.0044052967  
C 0.4298213415 -1.1420469956 -0.0000156681  
O -3.0326587827 0.0156723515 0.0029676644  
O -1.7435318432 2.3749127597 -0.0053845388  
C 2.5473537462 0.1007301653 -0.007091041  
O 3.0841062203 1.3408143312 -0.0123413797  
O -1.694616684 -2.3176165506 0.0064652493  
O 3.2613183358 -0.8743253351 -0.0051067437  
H 1.0142344845 -2.0529036693 0.0012923361  
H 0.8343329537 2.2400457675 -0.0098195332  
H -1.1393565212 -3.096561558 0.0072198891  
H -3.3858221574 -0.8786876248 0.0054800637  
H -2.6849148763 2.1751478516 -0.0035354488  
H 4.0359511528 1.2076060546 -0.0136641392

ωB97XD Gallic Acid (Neutral) 0.008 a.u.

C -0.9490508991 -1.1856052833 0.0024457172  
C -1.689259991 -0.0037645637 0.0007336478  
C -1.0364703603 1.2288571967 -0.0036216862  
C 0.3462134365 1.2754082997 -0.006223784  
C 1.0778690416 0.0907742602 -0.0043734928  
C 0.4307244104 -1.1453501497 0.0000215768  
O -3.0289933984 0.017923553 0.0029786937  
O -1.73988819 2.3728595712 -0.0053663719  
C 2.5458493829 0.1030121176 -0.0070675486  
O 3.0817546286 1.3465375913 -0.0124200051  
O -1.6950234955 -2.3183768683 0.0064753784  
O 3.2714448968 -0.8658885719 -0.0050468702  
H 1.0134174929 -2.0572781918 0.0013298821  
H 0.8333097369 2.2383106557 -0.0098174464  
H -1.1452580804 -3.1010667262 0.0071226112  
H -3.3944855471 -0.8719395267 0.0054557298  
H -2.6830180681 2.1785475153 -0.0035787477  
H 4.0324260034 1.208264121 -0.0137532841

ωB97XD Caffeic Acid (Radical) Zero field

C 1.2515237661 0.0509487931 -0.7635371549  
C -0.0006867099 -0.0759983898 -0.0038349881  
C -0.0148869899 -0.1278669757 1.3648399601  
C 1.1943382408 -0.0567256001 2.0703218826  
C 2.4249146501 0.0686548998 1.3562567452  
C 2.4702019172 0.1197999061 0.0023121719  
O -1.1042848442 -0.1350533462 -0.7306466106  
C 1.2624795393 -0.1028486052 3.5130824929  
C 0.237673067 -0.2461955326 4.3647952697  
C 0.4903254341 -0.2693785134 5.8176366256  
O -0.6502992436 -0.4231828102 6.5120891503  
O 1.1786154109 0.0912778807 -1.994885488  
O 1.5647417834 -0.1662288218 6.3478984247  
H 2.2500386961 -0.0114187108 3.954194982  
H -0.7900384151 -0.3515243075 4.0464028115  
H -0.4137956611 -0.4291732905 7.4460156173  
H -0.809833988 -0.0786032375 -1.6567860427  
H 3.4012314417 0.2143649425 -0.5390374068  
H 3.3422546842 0.1220323217 1.9290392985  
H -0.9628607792 -0.2203616024 1.8756152586

ωB97XD Caffeic Acid (Radical) 0.010 a.u.

C 1.2546832326 0.0552815574 -0.7681043999  
C -0.0058477003 -0.0787844277 -0.0004768465  
C -0.007829358 -0.1329550576 1.371475194  
C 1.2062137931 -0.0589508881 2.0698106413  
C 2.4404571303 0.069566346 1.3491676989  
C 2.4839579312 0.1234171703 -0.0009455733  
O -1.1094258571 -0.1397896357 -0.7036180419  
C 1.2772974292 -0.1047851827 3.5021956824  
C 0.2492710633 -0.2405723261 4.3700393407  
C 0.4772277094 -0.2667294342 5.8016847927  
O -0.6841778683 -0.4210596759 6.5000755907  
O 1.1809458122 0.1012944087 -1.9849919242  
O 1.526909917 -0.1707872466 6.4013710551  
H 2.2697035067 -0.0195807033 3.9347435672  
H -0.7757801139 -0.3395581788 4.0434145286  
H -0.4128133196 -0.428812768 7.421748679  
H -0.8635747792 -0.0848796301 -1.6459984003  
H 3.4089399523 0.2187563468 -0.5526260497  
H 3.3602502612 0.1219907998 1.9191415554  
H -0.9547567421 -0.2305424741 1.8836659096

ωB97XD Caffeic Acid (Radical) 0.002 a.u.

C 1.2512697495 0.0512412559 -0.7638779492  
C -0.0016751335 -0.0761120416 -0.0022987738

C -0.0124863352 -0.1278900092 1.3672092544  
C 1.1979825164 -0.0565269828 2.0697324292  
C 2.4284314291 0.0686119932 1.3545526456  
C 2.4724386143 0.1197035894 0.0009392666  
O -1.1057055813 -0.1352469931 -0.7238421827  
C 1.2665152598 -0.1023773794 3.5118865796  
C 0.2412080784 -0.2454750411 4.3648652875  
C 0.4873052544 -0.268709972 5.8144241673  
O -0.6578883896 -0.4248343153 6.5075447751  
O 1.1771544435 0.0920950491 -1.9924894251  
O 1.5558805205 -0.1648793785 6.3595420064  
H 2.254845252 -0.0108229422 3.9513722026  
H -0.7855072223 -0.3510633661 4.0439595823  
H -0.4165719462 -0.4306268025 7.4396082259  
H -0.8202045496 -0.0794860206 -1.6532319067  
H 3.4019433997 0.2137583528 -0.5430285055  
H 3.3467061439 0.1216670968 1.9260392197  
H -0.9599895038 -0.2205070927 1.8788661005

ωB97XD Caffeic Acid (Radical) 0.004 a.u.

C 1.2513778327 0.0517423722 -0.7643728994  
C -0.0027235224 -0.0764934151 -0.0011082659  
C -0.0106642617 -0.1285231827 1.3690965255  
C 1.2009632501 -0.056725335 2.0694093878  
C 2.4316497207 0.068708673 1.3530780878  
C 2.4748272192 0.1200557809 -0.0000421499  
O -1.1068487185 -0.1357760323 -0.7179368241  
C 1.2699824505 -0.1024467563 3.510193415  
C 0.2441020089 -0.2445289063 4.3653771945  
C 0.4845421491 -0.2680943831 5.8111987706  
O -0.664945975 -0.4253889419 6.5040060121  
O 1.1764094639 0.093425959 -1.9902025581  
O 1.5477446395 -0.1646563244 6.3705498642  
H 2.2592026416 -0.011561445 3.9479970153  
H -0.7818743255 -0.3495037735 4.0424383904  
H -0.4177446696 -0.4312111457 7.433941296  
H -0.8301412233 -0.0803604604 -1.6504675068  
H 3.4029590567 0.2140173854 -0.5463381899  
H 3.3506537488 0.1215899987 1.9236055818  
H -0.9578194857 -0.2217510675 1.8813498531

ωB97XD Caffeic Acid (Radical) 0.006 a.u.

C 1.2519659831 0.0523182063 -0.7651797779  
C -0.003786715 -0.0769440983 -0.0003698647  
C -0.0093088841 -0.1293049033 1.3704572167  
C 1.2033433463 -0.0569929851 2.0693298662

C 2.4347133835 0.0689504366 1.3517615949  
C 2.4775233836 0.1205991626 -0.0006634082  
O -1.1078816491 -0.1364503061 -0.7126007622  
C 1.2728770613 -0.1026442848 3.5080134989  
C 0.2463815582 -0.2434869245 4.3663345229  
C 0.4819617528 -0.2675743552 5.8079608327  
O -0.6715453993 -0.4253954066 6.5015117984  
O 1.176834714 0.0948503582 -1.9881719436  
O 1.5402020458 -0.1652094548 6.3810411815  
H 2.2630280511 -0.0127844151 3.9441743232  
H -0.7790305665 -0.3475321701 4.0417510409  
H -0.4174342131 -0.4314601751 7.4290396574  
H -0.8406055082 -0.0814148679 -1.648331449  
H 3.404452118 0.2145995773 -0.5490201168  
H 3.3542230836 0.1217232896 1.9217034623  
H -0.9562615459 -0.2233276838 1.8830313265

ωB97XD Caffeic Acid (Radical) 0.008 a.u.

C 1.2531342889 0.0531541089 -0.7664624328  
C -0.0047806011 -0.0775112276 -0.0001488881  
C -0.008267399 -0.1303001134 1.3712574662  
C 1.2052106246 -0.057388416 2.069499459  
C 2.4377524372 0.0693043872 1.3505000596  
C 2.4806378463 0.1214261261 -0.0009582618  
O -1.1089182392 -0.1374620558 -0.7075459821  
C 1.2753380608 -0.1030381089 3.505362918  
C 0.2481299891 -0.2422966535 4.3678048314  
C 0.4794729113 -0.2671518812 5.8047348778  
O -0.6779462531 -0.424651233 6.500040197  
O 1.1786496508 0.0967554003 -1.9865094971  
O 1.5331276107 -0.1667564928 6.3912781293  
H 2.2664707272 -0.0146637822 3.9398887025  
H -0.7768922737 -0.3449290162 4.041922614  
H -0.4158942733 -0.431256728 7.4248535095  
H -0.8524682739 -0.0829291778 -1.6466759028  
H 3.4065267642 0.215635404 -0.5511272471  
H 3.3575434393 0.1219622366 1.9202311162  
H -0.955175037 -0.2253837768 1.8838273312

ωB97XD Gallic Acid (Radical) Zero field

C -0.9452843247 -1.2171406279 0.003170119  
C -1.747332079 -0.0029157395 0.0016500119  
C -1.0172562429 1.2639157535 -0.0032532542  
C 0.3554390109 1.317096852 -0.0062955701  
C 1.0621418546 0.1143483388 -0.0044946114  
C 0.4211272517 -1.1363390455 0.0002324321

O -2.9807365673 0.0227755788 0.0041293564  
O -1.7720257488 2.3511195679 -0.004568907  
C 2.5494442767 0.0942603426 -0.0074979721  
O 3.0954144481 1.3181357511 -0.0130645841  
O -1.6385934199 -2.3586621655 0.007483788  
O 3.2113013893 -0.9094436609 -0.0053120299  
H 1.036107212 -2.0275907469 0.0013493154  
H 0.866708316 2.2673361272 -0.0100249582  
H -1.0405301803 -3.1086903185 0.0082081213  
H -2.6919851704 2.0351519962 -0.0019022477  
H 4.0511519742 1.1997649967 -0.0145140093

ωB97XD Gallic Acid (Radical) 0.010 a.u.

C -0.9419113921 -1.2316956832 0.0032650699  
C -1.7485333087 -0.0095178549 0.0018907423  
C -1.0168586484 1.2622242239 -0.0032591924  
C 0.3579886659 1.3063830285 -0.0063777219  
C 1.0689503709 0.1020982202 -0.0044870879  
C 0.4267843817 -1.1531635751 0.0003344967  
O -2.9708410986 0.0084061338 0.004505179  
O -1.7512988003 2.3529704603 -0.0046507384  
C 2.5393952573 0.1055972113 -0.0075664805  
O 3.0841920576 1.3449111524 -0.0132501125  
O -1.6492479139 -2.3537184413 0.0074632119  
O 3.2571294272 -0.8697195081 -0.0049338149  
H 1.0333593417 -2.049657918 0.0014358518  
H 0.8642997022 2.2590216439 -0.0102952593  
H -1.0854544357 -3.1292507833 0.0077896381  
H -2.6863934628 2.079697913 -0.0020278708  
H 4.0335318559 1.1985367766 -0.0145409111

ωB97XD Gallic Acid (Radical) 0.002 a.u.

C -0.944801786 -1.2197397522 0.0031883118  
C -1.7472448547 -0.0040084401 0.0016980805  
C -1.0169945697 1.2634876538 -0.003248872  
C 0.3561772645 1.3148840617 -0.0062928835  
C 1.0631217454 0.1118359468 -0.0044708694  
C 0.4221939773 -1.1394933144 0.0002601651  
O -2.9784488669 0.0206933993 0.004206206  
O -1.7678893968 2.3512133595 -0.004589801  
C 2.5473091418 0.0964176817 -0.0074721237  
O 3.0927916996 1.3232400929 -0.0131252277  
O -1.6406979445 -2.3575234666 0.0074655147  
O 3.2202031227 -0.9016125839 -0.0052333092  
H 1.0353509152 -2.0318429664 0.0013751539  
H 0.866491295 2.2655393929 -0.0100522102



H -1.0490198029 -3.1124290332 0.0081040814  
H -2.6907240717 2.0427454243 -0.0019518167  
H 4.0472741316 1.1997155441 -0.0145654

ωB97XD Gallic Acid (Radical) 0.004 a.u.

C -0.9442093748 -1.2225535869 0.0032052745  
C -1.7473623655 -0.0053064915 0.0017431338  
C -1.016871597 1.2630359179 -0.0032463555  
C 0.3567532888 1.3126136756 -0.006293318  
C 1.0642705268 0.1092982297 -0.0044488243  
C 0.4233117922 -1.1428012578 0.0002891722  
O -2.9763433113 0.017977341 0.0042753587  
O -1.7635716409 2.351539737 -0.0046098096  
C 2.5452217682 0.098639224 -0.0074463517  
O 3.0902874991 1.3284862459 -0.0131880532  
O -1.6427647731 -2.3565267417 0.0074484128  
O 3.2292666261 -0.8936573208 -0.0051514707  
H 1.0347245258 -2.036217708 0.0014042142  
H 0.8660711031 2.2637277274 -0.0100831545  
H -1.0576920781 -3.1164122942 0.0080036594  
H -2.6895084138 2.0516470686 -0.0019898763  
H 4.0435084245 1.1996332336 -0.0146170117

ωB97XD Gallic Acid (Radical) 0.006 a.u.

C -0.943476153 -1.2255888865 0.0032219571  
C -1.7476849615 -0.0067906206 0.0017837516  
C -1.0168835689 1.2625822072 -0.0032437195  
C 0.3571644695 1.3103080272 -0.00629366  
C 1.0656114237 0.1067555937 -0.0044235127  
C 0.4244902304 -1.1462621851 0.0003250547  
O -2.9743938472 0.0146377403 0.0043121021  
O -1.7591331868 2.3520875265 -0.0046229487  
C 2.5431696324 0.1009294156 -0.0074169518  
O 3.0879354254 1.3338890207 -0.0132598811  
O -1.6447961858 -2.3556647943 0.0074309296  
O 3.2384869783 -0.8855899625 -0.0050674207  
H 1.0342528962 -2.0407053608 0.0014448028  
H 0.8654418146 2.2619248156 -0.0101142315  
H -1.0665984062 -3.1206675322 0.0079075592  
H -2.6883697836 2.0618172269 -0.002007592  
H 4.0398752224 1.1994607682 -0.0146812389

ωB97XD Gallic Acid (Radical) 0.008 a.u.

C -0.942774248 -1.228583873 0.003239445  
C -1.7480705472 -0.0081707119 0.0018230951  
C -1.0168975583 1.2623265951 -0.0032520295

C 0.3575897981 1.3082758767 -0.0063388165  
C 1.0671607308 0.1043679086 -0.0044623903  
C 0.4256311182 -1.149697569 0.0003249371  
O -2.9726642489 0.0114636059 0.0044129582  
O -1.7550513341 2.3525937719 -0.0046332228  
C 2.5412664435 0.1032296594 -0.0075008163  
O 3.0859207145 1.3393439325 -0.0132546518  
O -1.6469881141 -2.3547431498 0.0074509937  
O 3.2477347285 -0.8777018455 -0.0049931682  
H 1.0337799796 -2.0451729261 0.0014388765  
H 0.8648842688 2.260398388 -0.0102054878  
H -1.0757705352 -3.124891538 0.0078606404  
H -2.6872561228 2.0709369584 -0.0020150898  
H 4.0365969268 1.1991479167 -0.014600273

CAM-B3LYP Caffeic Acid (Neutral) -0.010 a.u.

C 1.2582208532 0.0570247472 -0.7103773349  
C 0.0467138611 -0.1195497254 -0.0553809451  
C 0.0169035976 -0.2012206228 1.3197091431  
C 1.1925595603 -0.1070589182 2.0656565766  
C 2.3962236162 0.0633865856 1.3866240457  
C 2.4299563961 0.1463122913 0.0064595122  
O -1.1091643798 -0.212141483 -0.7767508578  
C 1.2320794371 -0.1746705609 3.5266168659  
C 0.214606697 -0.2139217674 4.3755532765  
C 0.5094749925 -0.2681306203 5.8336601109  
O -0.6103870368 -0.2817978968 6.5569460441  
O 1.2073511688 0.1308988472 -2.0950480721  
O 1.61526371 -0.2942057116 6.2916629996  
H 2.220973494 -0.1805671267 3.9721934159  
H -0.8255963414 -0.2001598262 4.0813978976  
H -0.378579096 -0.3113166292 7.4981446379  
H 2.0846939515 0.3474420082 -2.413696966  
H -0.8855899402 -0.1028818294 -1.7047756435  
H 3.3737885282 0.2809696647 -0.5104914051  
H 3.314408167 0.1357507964 1.9518630336  
H -0.9387902362 -0.340490223 1.8046176647

CAM-B3LYP Caffeic Acid (Neutral) -0.002 a.u.

C 1.2618365283 0.0531798873 -0.7071510717  
C 0.0486448736 -0.0792995834 -0.0317759093  
C 0.0360886083 -0.1351535886 1.3420371177  
C 1.224851316 -0.060789509 2.0704474364  
C 2.4235773321 0.0709823167 1.3792003672  
C 2.4435635092 0.1278949877 -0.004283795  
O -1.1136035954 -0.1526407108 -0.7252952096

|   |               |               |               |
|---|---------------|---------------|---------------|
| C | 1.26383148    | -0.1148891589 | 3.5282214247  |
| C | 0.2392266783  | -0.2369749148 | 4.3662620126  |
| C | 0.4870016545  | -0.2720002945 | 5.8172389463  |
| O | -0.6583120872 | -0.3965727165 | 6.512347693   |
| O | 1.1734295079  | 0.1001460561  | -2.0716580972 |
| O | 1.5606576977  | -0.2014858401 | 6.3518923768  |
| H | 2.2485365787  | -0.0465968705 | 3.9776547019  |
| H | -0.7894138518 | -0.3136514481 | 4.0460984637  |
| H | -0.4256572238 | -0.4122599562 | 7.4504032253  |
| H | 2.0449019723  | 0.1957276232  | -2.4610379292 |
| H | -0.9181881913 | -0.0957275544 | -1.6662510845 |
| H | 3.3819546096  | 0.2310972726  | -0.5353121855 |
| H | 3.3516524451  | 0.1302451787  | 1.9300961364  |
| H | -0.919468842  | -0.2375591764 | 1.8354493799  |

CAM-B3LYP Caffeic Acid (Neutral) -0.004 a.u.

|   |               |               |               |
|---|---------------|---------------|---------------|
| C | 1.2607831451  | 0.0531134028  | -0.7078687231 |
| C | 0.0476784946  | -0.0835171544 | -0.0367446185 |
| C | 0.0311328068  | -0.1418528866 | 1.3375866249  |
| C | 1.2172424805  | -0.0658469822 | 2.0693852149  |
| C | 2.417360906   | 0.0695693102  | 1.3806640039  |
| C | 2.4405056355  | 0.129071284   | -0.0023507735 |
| O | -1.1138783694 | -0.1586931177 | -0.7361120541 |
| C | 1.2562470546  | -0.1208689446 | 3.528578969   |
| C | 0.2336449502  | -0.2361616727 | 4.3679732176  |
| C | 0.4922024214  | -0.2717593873 | 5.8211015418  |
| O | -0.6470514079 | -0.3844005298 | 6.5220886402  |
| O | 1.1812694687  | 0.1029210079  | -2.0776088474 |
| O | 1.5737760555  | -0.2095286003 | 6.3377335895  |
| H | 2.2413915352  | -0.0583342004 | 3.9777923477  |
| H | -0.7974499604 | -0.3056223836 | 4.0533520885  |
| H | -0.4150650034 | -0.4004636843 | 7.4610216259  |
| H | 2.0576074563  | 0.213029668   | -2.4510040672 |
| H | -0.9113680649 | -0.094931908  | -1.6745609114 |
| H | 3.3805118593  | 0.2353080942  | -0.5305430491 |
| H | 3.3434766979  | 0.1300451035  | 1.9345480527  |
| H | -0.9249071616 | -0.2474044185 | 1.8295511277  |

CAM-B3LYP Caffeic Acid (Neutral) -0.006 a.u.

|   |               |               |               |
|---|---------------|---------------|---------------|
| C | 1.2597366348  | 0.0544078391  | -0.7086969895 |
| C | 0.046851777   | -0.0905587522 | -0.0423000294 |
| C | 0.0261060897  | -0.1539168172 | 1.3324301783  |
| C | 1.2092286655  | -0.0743439496 | 2.0682447108  |
| C | 2.4106746597  | 0.0683762319  | 1.3823371242  |
| C | 2.4371549775  | 0.1330290442  | -0.0000014517 |
| O | -1.1134691219 | -0.1692925333 | -0.7482185098 |

|   |               |               |               |
|---|---------------|---------------|---------------|
| C | 1.2484000645  | -0.131914551  | 3.5284422463  |
| C | 0.2274796402  | -0.2320481668 | 4.3701824177  |
| C | 0.4978313439  | -0.271217354  | 5.8252624934  |
| O | -0.6354270944 | -0.363145104  | 6.5329897561  |
| O | 1.1894332044  | 0.1093185496  | -2.0835222202 |
| O | 1.5878239679  | -0.2267701386 | 6.3230208364  |
| H | 2.2347039978  | -0.0830905474 | 3.9768208036  |
| H | -0.8067858804 | -0.2847830985 | 4.0619195874  |
| H | -0.403796217  | -0.3819522834 | 7.4727538052  |
| H | 2.0697858782  | 0.2383619595  | -2.4402990689 |
| H | -0.9036550536 | -0.096829306  | -1.6839192659 |
| H | 3.3786584347  | 0.245362333   | -0.5249503713 |
| H | 3.334555703   | 0.1312126253  | 1.9395439728  |
| H | -0.9301806716 | -0.2665339806 | 1.8225439745  |

CAM-B3LYP Caffeic Acid (Neutral) -0.008 a.u.

|   |               |               |               |
|---|---------------|---------------|---------------|
| C | 1.2587816932  | 0.0562272802  | -0.7095592998 |
| C | 0.0464138652  | -0.1021921526 | -0.0485020898 |
| C | 0.0212629388  | -0.173365739  | 1.3264930908  |
| C | 1.2009261243  | -0.087708539  | 2.0670127576  |
| C | 2.4035605205  | 0.0668311128  | 1.3842860992  |
| C | 2.4335495317  | 0.1394280151  | 0.0028985615  |
| O | -1.1120428185 | -0.1869781082 | -0.761707495  |
| C | 1.2403656439  | -0.1496438612 | 3.5277835238  |
| C | 0.2209865073  | -0.2245687736 | 4.3728127039  |
| C | 0.5036760355  | -0.2703507669 | 5.829492107   |
| O | -0.6234005281 | -0.3290061765 | 6.5448168798  |
| O | 1.1980329929  | 0.1190396878  | -2.0893497477 |
| O | 1.6021354405  | -0.2558408696 | 6.3075657678  |
| H | 2.2281669322  | -0.1238054081 | 3.9748724161  |
| H | -0.8166553774 | -0.249406677  | 4.0715078286  |
| H | -0.3916544938 | -0.3526609938 | 7.4852911296  |
| H | 2.0799369128  | 0.2799989972  | -2.4282369862 |
| H | -0.89514488   | -0.0999535332 | -1.6940752298 |
| H | 3.3763296148  | 0.2614289041  | -0.518331428  |
| H | 3.3248157713  | 0.1336435332  | 1.9452614275  |
| H | -0.9349314271 | -0.297443932  | 1.8142519831  |

CAM-B3LYP Caffeic Acid (Neutral) -0.010 a.u.

|   |               |               |               |
|---|---------------|---------------|---------------|
| C | -0.949994191  | -1.1525942847 | 0.002075535   |
| C | -1.6843984823 | 0.01969223    | 0.0002058212  |
| C | -1.0415816246 | 1.2448530466  | -0.0040897301 |
| C | 0.3406155806  | 1.2994399486  | -0.0065405099 |
| C | 1.0638669078  | 0.117442342   | -0.0046750274 |
| C | 0.4231247263  | -1.1142413076 | -0.0003861814 |
| O | -3.0605047925 | -0.0068154567 | 0.0026577657  |

O -1.7800306769 2.3907111596 -0.0058325984  
C 2.5582637663 0.0831099363 -0.0070721743  
O 3.1094766033 1.2962799597 -0.0110293663  
O -1.6953131285 -2.3085603192 0.0064646555  
O 3.1804222568 -0.9392477607 -0.0065966395  
H 1.0250420029 -2.0137185122 0.0009792675  
H 0.8431444244 2.2545271719 -0.0097826664  
H -1.1064031222 -3.0677171368 0.0083910791  
H -3.3186864214 -0.9343475047 0.0061957485  
H -2.7093415589 2.1451182435 -0.0029801337  
H 4.0738587298 1.1972932444 -0.0126908452

Recover connectivity data from disk.

NAtoms= 18 NQM= 18 NQMF= 0 NMMI= 0 NMMIF=  
NMic= 0 NMicF= 0.

CAM-B3LYP Caffeic Acid (Neutral) -0.002 a.u.

C -0.9489490829 -1.1654676607 0.0022506124  
C -1.6835211495 0.0099395847 0.0004456894  
C -1.0369700283 1.23629258 -0.0038962789  
C 0.3443204033 1.2867269318 -0.0064491928  
C 1.0685047769 0.1041862112 -0.0046275514  
C 0.4261498145 -1.1280873147 -0.0002752765  
O -3.0441372297 0.0051486191 0.0028384448  
O -1.759716731 2.3818642697 -0.0056310748  
C 2.5502559932 0.092039598 -0.00722289  
O 3.0931270488 1.3194354497 -0.011429692  
O -1.6957653048 -2.311320584 0.0065721555  
O 3.21941972 -0.9055157262 -0.0061030087  
H 1.0185624708 -2.0328404772 0.0010615818  
H 0.8407831713 2.2442068675 -0.0098145052  
H -1.1257472873 -3.0837044975 0.0079638184  
H -3.350685647 -0.9080208052 0.0058590856  
H -2.6968091851 2.1602226574 -0.0033123802  
H 4.0527392467 1.2061192963 -0.0129355373

CAM-B3LYP Caffeic Acid (Neutral) -0.004 a.u.

C -0.9492765438 -1.1622132491 0.0022119514  
C -1.6836218345 0.0123842551 0.00039715  
C -1.0380231019 1.2383155767 -0.0039417392  
C 0.3434797554 1.2897344565 -0.006483663  
C 1.0671356326 0.1073358908 -0.0046583234  
C 0.4253452025 -1.1246925623 -0.0003126968  
O -3.0481125179 0.0023387606 0.0028122357  
O -1.7644275988 2.3840714639 -0.0056755602  
C 2.552095562 0.0897926121 -0.00722527  
O 3.0967298314 1.3137044552 -0.011321312

|   |               |               |               |
|---|---------------|---------------|---------------|
| O | -1.6955808653 | -2.3106538139 | 0.0065545757  |
| O | 3.2095977418  | -0.9139708485 | -0.00620908   |
| H | 1.0199626401  | -2.0281991388 | 0.0010261648  |
| H | 0.8415201632  | 2.2465575875  | -0.0098262363 |
| H | -1.1206239821 | -3.0796091441 | 0.0080686627  |
| H | -3.3425389464 | -0.9146146154 | 0.0059445128  |
| H | -2.6996226821 | 2.1565952104  | -0.0032391932 |
| H | 4.0575225436  | 1.2043481034  | -0.0128281791 |

CAM-B3LYP Caffeic Acid (Neutral) -0.006 a.u.

|   |               |               |               |
|---|---------------|---------------|---------------|
| C | -0.9495562482 | -1.1589881158 | 0.0021700674  |
| C | -1.683801326  | 0.0148184004  | 0.0003399054  |
| C | -1.0391524293 | 1.2404168347  | -0.0039875017 |
| C | 0.3425734576  | 1.2928677518  | -0.0065045954 |
| C | 1.0659041259  | 0.1106094507  | -0.0046692033 |
| C | 0.4245767514  | -1.1212461356 | -0.0003395795 |
| O | -3.0521689686 | -0.0005920653 | 0.0027680308  |
| O | -1.7693988741 | 2.3862791167  | -0.0057239663 |
| C | 2.5540529692  | 0.0875567418  | -0.0071890321 |
| O | 3.1006921626  | 1.3079130972  | -0.0112237258 |
| O | -1.6954493805 | -2.3099651671 | 0.0065280324  |
| O | 3.1998286033  | -0.9224289135 | -0.0063319301 |
| H | 1.0215141674  | -2.0234580708 | 0.0010053448  |
| H | 0.8421361345  | 2.249081054   | -0.0098167301 |
| H | -1.1156950853 | -3.0755738308 | 0.0081748932  |
| H | -3.334500288  | -0.9212031181 | 0.0060234015  |
| H | -2.7026703895 | 2.1528571563  | -0.0031615265 |
| H | 4.0626756176  | 1.2022808136  | -0.0127678845 |

CAM-B3LYP Caffeic Acid (Neutral) -0.008 a.u.

|   |               |               |               |
|---|---------------|---------------|---------------|
| C | -0.94979313   | -1.1557848022 | 0.0021247536  |
| C | -1.6840596863 | 0.0172539296  | 0.0002772538  |
| C | -1.0403333454 | 1.2425962551  | -0.0040375736 |
| C | 0.3416218333  | 1.2960982485  | -0.0065270386 |
| C | 1.0648208712  | 0.1139716569  | -0.0046793459 |
| C | 0.4238360451  | -1.1177682437 | -0.0003666132 |
| O | -3.0562909403 | -0.0036457929 | 0.0027200767  |
| O | -1.7745913203 | 2.3884938126  | -0.0057762143 |
| C | 2.5560960662  | 0.0853338677  | -0.0071462519 |
| O | 3.1049294035  | 1.3021235582  | -0.0111230916 |
| O | -1.6953611975 | -2.3092690039 | 0.006499907   |
| O | 3.1901103595  | -0.9308426584 | -0.0064587373 |
| H | 1.0232021211  | -2.0186394162 | 0.0009863132  |
| H | 0.842685702   | 2.2517297157  | -0.0098073359 |
| H | -1.1109641744 | -3.0716157775 | 0.008282734   |
| H | -3.3265496802 | -0.9277798876 | 0.0061105165  |

H -2.7059032798 2.1490417623 -0.0030747186  
H 4.0681053522 1.1999277758 -0.0127106339

CAM-B3LYP Caffeic Acid (Radical) -0.010 a.u.

C 1.255379458 0.0545689847 -0.7568686119  
C 0.0051568821 -0.0821906597 -0.0153297901  
C -0.0342584522 -0.1374085053 1.3437880846  
C 1.1657615125 -0.0610221723 2.0774948169  
C 2.3991160995 0.076098131 1.3710853824  
C 2.4559029486 0.1328114208 0.0186564488  
O -1.0884555251 -0.149525593 -0.7841797832  
C 1.2312208335 -0.1151133322 3.5088519342  
C 0.2101325661 -0.2382199711 4.3710840654  
C 0.5118750849 -0.2778409785 5.8301954032  
O -0.5994007179 -0.3873803637 6.5511575709  
O 1.1944998017 0.0932650489 -2.0036182309  
O 1.6226055914 -0.2181156293 6.2712698036  
H 2.2170767787 -0.0505379208 3.9558609563  
H -0.8269178123 -0.310710592 4.0753263745  
H -0.3744640506 -0.4068659502 7.4949823811  
H -0.7389191906 -0.0826985499 -1.6918540851  
H 3.3942269239 0.2376510227 -0.507500208  
H 3.3066434752 0.1354182744 1.9564246136  
H -0.9855302073 -0.2396636646 1.8449458738

CAM-B3LYP Caffeic Acid (Radical) -0.002 a.u.

C 1.2498842983 0.0551309562 -0.7564738842  
C 0.0024701002 -0.0818209017 -0.0018335628  
C -0.0140501701 -0.1370478609 1.3623511102  
C 1.1923825256 -0.0609011508 2.0724431813  
C 2.4205310756 0.0738997599 1.3594309987  
C 2.4647270345 0.1308826253 0.007709594  
O -1.1001186219 -0.1481893925 -0.7375208926  
C 1.2593474729 -0.1127010275 3.5113038606  
C 0.2343019217 -0.2367305521 4.362655153  
C 0.4938414566 -0.2727464346 5.8145208671  
O -0.6441300439 -0.3993343894 6.514661335  
O 1.1783310695 0.0972543047 -1.9908628062  
O 1.5756623275 -0.2005352633 6.3294059309  
H 2.2470273114 -0.0439625728 3.9529262432  
H -0.7960538177 -0.3140666771 4.0487785712  
H -0.4123457625 -0.4165427563 7.4532845444  
H -0.7982525327 -0.0856198136 -1.6631980564  
H 3.3936364073 0.2332998407 -0.5344939546  
H 3.3349281677 0.1310769582 1.9344461734  
H -0.9604682198 -0.2388266525 1.8722385938

CAM-B3LYP Caffeic Acid (Radical) -0.004 a.u.

|   |               |               |               |
|---|---------------|---------------|---------------|
| C | 1.2507492489  | 0.0547357444  | -0.7564107983 |
| C | 0.0031561063  | -0.0819014369 | -0.0043788813 |
| C | -0.0181227507 | -0.1371875599 | 1.3587410542  |
| C | 1.1868892275  | -0.0610910928 | 2.0734330522  |
| C | 2.4159161794  | 0.0742714825  | 1.3617331931  |
| C | 2.4625503691  | 0.1312742725  | 0.0098536293  |
| O | -1.0977746058 | -0.1484378278 | -0.7472619678 |
| C | 1.2536280757  | -0.1134221237 | 3.511423391   |
| C | 0.2294013085  | -0.2370536343 | 4.3638749112  |
| C | 0.497770871   | -0.2737000385 | 5.8181857658  |
| O | -0.6345305733 | -0.396818408  | 6.5218829432  |
| O | 1.1810354287  | 0.0966807177  | -1.9936444788 |
| O | 1.5863145313  | -0.2038967394 | 6.3162012087  |
| H | 2.2408221641  | -0.0456452359 | 3.9543281318  |
| H | -0.8023801249 | -0.3131600001 | 4.053643009   |
| H | -0.4058449835 | -0.4145228115 | 7.462039449   |
| H | -0.7848194201 | -0.085031289  | -1.6689126531 |
| H | 3.3934591658  | 0.234442086   | -0.5289076495 |
| H | 3.3288576835  | 0.1320072861  | 1.9389053413  |
| H | -0.9654259014 | -0.2390243912 | 1.8670443489  |

CAM-B3LYP Caffeic Acid (Radical) -0.006 a.u.

|   |               |               |               |
|---|---------------|---------------|---------------|
| C | 1.2519002303  | 0.0551723112  | -0.7563831094 |
| C | 0.0038320419  | -0.081958438  | -0.0074398341 |
| C | -0.0228716057 | -0.1373575214 | 1.354470223   |
| C | 1.1805843319  | -0.0610489067 | 2.0746087087  |
| C | 2.4107937269  | 0.0748492959  | 1.3644314199  |
| C | 2.4603625984  | 0.1318046416  | 0.0124280071  |
| O | -1.0950134148 | -0.1487259275 | -0.7582714611 |
| C | 1.2470676499  | -0.1139969579 | 3.5110313224  |
| C | 0.2237951098  | -0.2375396114 | 4.3656366479  |
| C | 0.5020545969  | -0.2750397596 | 5.8218920843  |
| O | -0.6239441779 | -0.3941826045 | 6.5303917896  |
| O | 1.1846903531  | 0.0948938958  | -1.9966564352 |
| O | 1.5975768564  | -0.2075352796 | 6.3022513592  |
| H | 2.2337916459  | -0.0471233462 | 3.9552164672  |
| H | -0.8095553142 | -0.3125847688 | 4.0596470149  |
| H | -0.3972574248 | -0.4121785091 | 7.4718983911  |
| H | -0.7705308834 | -0.0836991589 | -1.6756085506 |
| H | 3.3935265876  | 0.2352553891  | -0.5225497725 |
| H | 3.3221184416  | 0.1329437747  | 1.9440244261  |
| H | -0.9712693498 | -0.2394295187 | 1.8607543014  |

CAM-B3LYP Caffeic Acid (Radical) -0.008 a.u.



|   |               |               |               |
|---|---------------|---------------|---------------|
| C | 1.2534287885  | 0.0549598183  | -0.7565488866 |
| C | 0.0044880771  | -0.0820031729 | -0.0110585901 |
| C | -0.0282132829 | -0.1373231317 | 1.3495405466  |
| C | 1.1735882987  | -0.06101131   | 2.0759807228  |
| C | 2.4052697626  | 0.0753717629  | 1.3675134878  |
| C | 2.4581833501  | 0.1321760264  | 0.0153371974  |
| O | -1.0919290149 | -0.1489687311 | -0.7705166963 |
| C | 1.2396983475  | -0.114480073  | 3.5101999765  |
| C | 0.2174683173  | -0.23785266   | 4.3680234117  |
| C | 0.5067602307  | -0.2762451014 | 5.8259558294  |
| O | -0.6123261063 | -0.391536802  | 6.5400468421  |
| O | 1.1890594741  | 0.0937603097  | -1.9999595081 |
| O | 1.6096020663  | -0.2116079795 | 6.2874789528  |
| H | 2.2260137266  | -0.048592474  | 3.9556714352  |
| H | -0.81762037   | -0.3117613954 | 4.0667751078  |
| H | -0.3870460342 | -0.4101076484 | 7.4828065403  |
| H | -0.7554088425 | -0.082952272  | -1.6832726537 |
| H | 3.3937980247  | 0.2361418463  | -0.5154929795 |
| H | 3.3147909838  | 0.1339707607  | 1.9498432819  |
| H | -0.9779537972 | -0.2394187727 | 1.8534489821  |

CAM-B3LYP Caffeic Acid (Radical) -0.010 a.u.

|   |               |               |               |
|---|---------------|---------------|---------------|
| C | -0.9448570347 | -1.2021114765 | 0.0031669541  |
| C | -1.7436363667 | 0.003458874   | 0.0014093252  |
| C | -1.0160737775 | 1.2655202031  | -0.0034168414 |
| C | 0.3515765774  | 1.3266723367  | -0.0064254812 |
| C | 1.0593528666  | 0.1266115984  | -0.0047449497 |
| C | 0.415362031   | -1.1207210901 | 0.0000227822  |
| O | -2.9886260432 | 0.0341481949  | 0.0038920544  |
| O | -1.7945370927 | 2.3490587687  | -0.0047300033 |
| C | 2.5568370922  | 0.0846429146  | -0.0079853649 |
| O | 3.1088101007  | 1.2943672884  | -0.0117449519 |
| O | -1.6290836402 | -2.3622750358 | 0.0079345765  |
| O | 3.1648725577  | -0.9454134503 | -0.0071732459 |
| H | 1.039537074   | -2.0054554232 | 0.0011426362  |
| H | 0.869349812   | 2.2732220949  | -0.0099921627 |
| H | -1.0054873287 | -3.095795516  | 0.00920011    |
| H | -2.7026036447 | 1.9961009404  | -0.0018070633 |
| H | 4.0742988168  | 1.2010917777  | -0.0134533741 |

CAM-B3LYP Caffeic Acid (Radical) -0.002 a.u.

|   |               |               |               |
|---|---------------|---------------|---------------|
| C | -0.9435526984 | -1.2120037212 | 0.0032022407  |
| C | -1.7423184172 | -0.0008039981 | 0.0015485112  |
| C | -1.0145231221 | 1.2624786493  | -0.0033769245 |
| C | 0.3551586458  | 1.3159311873  | -0.0064000176 |
| C | 1.0611623132  | 0.1151432098  | -0.0046510873 |

|   |               |               |               |
|---|---------------|---------------|---------------|
| C | 0.419387141   | -1.1332909269 | 0.0000978352  |
| O | -2.9781203099 | 0.0261874555  | 0.0040443125  |
| O | -1.7747627619 | 2.3497945308  | -0.0047293237 |
| C | 2.5473945251  | 0.0927671698  | -0.007777446  |
| O | 3.0946418364  | 1.3148147458  | -0.0121418229 |
| O | -1.636653959  | -2.3579513528 | 0.0078291737  |
| O | 3.2004229208  | -0.9141358497 | -0.0065626636 |
| H | 1.0348761924  | -2.0229287825 | 0.0012349796  |
| H | 0.8689140522  | 2.2639010174  | -0.0100405397 |
| H | -1.0362948371 | -3.1097515581 | 0.0087849643  |
| H | -2.6955712164 | 2.0291400076  | -0.0019161553 |
| H | 4.054931695   | 1.2038312161  | -0.0138510366 |

CAM-B3LYP Caffeic Acid (Radical) -0.004 a.u.

|   |               |               |               |
|---|---------------|---------------|---------------|
| C | -0.9439461237 | -1.2094700277 | 0.0031913973  |
| C | -1.7425320481 | 0.0003236403  | 0.0015091833  |
| C | -1.0148090106 | 1.2631547259  | -0.0033854599 |
| C | 0.3543770494  | 1.3184341908  | -0.0064026975 |
| C | 1.0604837126  | 0.117846829   | -0.0046706249 |
| C | 0.4183441842  | -1.1301535016 | 0.0000792196  |
| O | -2.9805627872 | 0.0283700521  | 0.0039991644  |
| O | -1.7794314205 | 2.3496199185  | -0.0047275569 |
| C | 2.5496278817  | 0.0906774835  | -0.0078175472 |
| O | 3.0977537108  | 1.3097018857  | -0.0120484781 |
| O | -1.634704393  | -2.3590359119 | 0.0078515113  |
| O | 3.1915115019  | -0.921984453  | -0.0067100373 |
| H | 1.0358417932  | -2.0186368492 | 0.0012146685  |
| H | 0.8691874426  | 2.2659912341  | -0.0100211433 |
| H | -1.02826423   | -3.1061340871 | 0.0088887519  |
| H | -2.6971234738 | 2.0208844112  | -0.0018894298 |
| H | 4.0593382107  | 1.2035334594  | -0.0137659217 |

CAM-B3LYP Caffeic Acid (Radical) -0.006 a.u.

|   |               |               |               |
|---|---------------|---------------|---------------|
| C | -0.9442912789 | -1.2069786896 | 0.0031812868  |
| C | -1.7428233806 | 0.0014112232  | 0.0014707824  |
| C | -1.0151595922 | 1.2638949973  | -0.0033945481 |
| C | 0.3535195104  | 1.3210644383  | -0.0064049764 |
| C | 1.0599548122  | 0.1206642715  | -0.0046894758 |
| C | 0.4173227321  | -1.1270096286 | 0.0000619839  |
| O | -2.983120618  | 0.030434605   | 0.0039569801  |
| O | -1.7842960277 | 2.349435062   | -0.0047274782 |
| C | 2.5519549131  | 0.0886185174  | -0.0078589275 |
| O | 3.1011551354  | 1.3045741626  | -0.0119517537 |
| O | -1.6327910386 | -2.3601186199 | 0.0078751428  |
| O | 3.1826078911  | -0.9298333627 | -0.0068659184 |
| H | 1.0369436331  | -2.0142868614 | 0.001194697   |

|   |               |               |               |
|---|---------------|---------------|---------------|
| H | 0.8693566767  | 2.2682444614  | -0.0100019035 |
| H | -1.0204528516 | -3.1026006546 | 0.0089930277  |
| H | -2.6988256823 | 2.0126134169  | -0.0018651735 |
| H | 4.0640371658  | 1.2029956613  | -0.0136787457 |

CAM-B3LYP Caffeic Acid (Radical) -0.008 a.u.

|   |               |               |               |
|---|---------------|---------------|---------------|
| C | -0.9445889564 | -1.2045384307 | 0.0031757593  |
| C | -1.7431855357 | 0.0024590641  | 0.001446757   |
| C | -1.0155665711 | 1.2646783056  | -0.0034077867 |
| C | 0.352601092   | 1.3237973967  | -0.0064266063 |
| C | 1.0595895122  | 0.1235627939  | -0.0047301367 |
| C | 0.4163341194  | -1.1238917945 | 0.000035684   |
| O | -2.9858028805 | 0.0323294231  | 0.0039305112  |
| O | -1.7892685474 | 2.3492717242  | -0.0047277094 |
| C | 2.5542974319  | 0.0866313241  | -0.007943853  |
| O | 3.1047798239  | 1.2995484742  | -0.0118435233 |
| O | -1.6309300993 | -2.361192042  | 0.0079100369  |
| O | 3.1737564028  | -0.9375882748 | -0.0070022279 |
| H | 1.0381626224  | -2.0099311116 | 0.001159816   |
| H | 0.8694324781  | 2.2706377156  | -0.0100143803 |
| H | -1.0128938403 | -3.099165313  | 0.0090972508  |
| H | -2.7005751473 | 2.0043601764  | -0.0018258574 |
| H | 4.0689500952  | 1.2021535687  | -0.013538734  |

CAM-B3LYP Caffeic Acid (Neutral) Zero field

|   |               |               |               |
|---|---------------|---------------|---------------|
| C | 1.2630694805  | 0.053112576   | -0.7066151142 |
| C | 0.0496070647  | -0.0774879086 | -0.0273812177 |
| C | 0.0406195754  | -0.1320492388 | 1.345845448   |
| C | 1.2317721914  | -0.0582235182 | 2.0715633489  |
| C | 2.4292915249  | 0.0718448903  | 1.3779274771  |
| C | 2.4466018869  | 0.1273187319  | -0.0058353353 |
| O | -1.1128873167 | -0.1500955098 | -0.715670164  |
| C | 1.2709143578  | -0.1118836628 | 3.5274218136  |
| C | 0.2442351597  | -0.236625568  | 4.3652055523  |
| C | 0.4821696711  | -0.2721531767 | 5.813358705   |
| O | -0.6693057004 | -0.402637814  | 6.5037223615  |
| O | 1.1665029452  | 0.0980944968  | -2.0658193644 |
| O | 1.5484575153  | -0.1978357099 | 6.365245978   |
| H | 2.2555620579  | -0.041595276  | 3.976821045   |
| H | -0.7824492619 | -0.3160613527 | 4.0401610971  |
| H | -0.4345967904 | -0.4183811072 | 7.4405578698  |
| H | 2.0319829619  | 0.189021868   | -2.4703736781 |
| H | -0.9244488444 | -0.0968429124 | -1.6588203821 |
| H | 3.383461397   | 0.2287998729  | -0.5393113899 |
| H | 3.3590269657  | 0.1305422737  | 1.9262791123  |
| H | -0.9144758416 | -0.2331899543 | 1.8403008371  |

## CAM-B3LYP Caffeic Acid (Neutral) 0.010 a.u.

|   |               |               |               |
|---|---------------|---------------|---------------|
| C | 1.2714650225  | 0.0524698789  | -0.7071632661 |
| C | 0.0508829107  | -0.0719588809 | -0.0138017199 |
| C | 0.0521370473  | -0.1218496581 | 1.3559962894  |
| C | 1.2527701834  | -0.0491085419 | 2.0788064239  |
| C | 2.4498629081  | 0.0758031719  | 1.3735564021  |
| C | 2.4624100584  | 0.1257549454  | -0.0084438832 |
| O | -1.1071141898 | -0.1416805554 | -0.6856476021 |
| C | 1.2953746471  | -0.1009537593 | 3.5169683813  |
| C | 0.2612439634  | -0.2330964841 | 4.3690525536  |
| C | 0.464265392   | -0.2715249171 | 5.7963978874  |
| O | -0.7126405606 | -0.422565053  | 6.4791693118  |
| O | 1.1457762768  | 0.0898008386  | -2.0387732826 |
| O | 1.4989587186  | -0.1899694226 | 6.4263858556  |
| H | 2.2825319941  | -0.0259100306 | 3.9616274699  |
| H | -0.758818632  | -0.3208855759 | 4.0280594475  |
| H | -0.4519807648 | -0.441270193  | 7.4061752711  |
| H | 1.9805795669  | 0.1667038449  | -2.5127035462 |
| H | -0.9486326342 | -0.1011208258 | -1.6382169072 |
| H | 3.3943386301  | 0.2212478292  | -0.5495498231 |
| H | 3.3844062832  | 0.1329703336  | 1.9151458718  |
| H | -0.9027058211 | -0.2191849449 | 1.851542865   |

## CAM-B3LYP Caffeic Acid (Neutral) 0.002 a.u.

|   |               |               |               |
|---|---------------|---------------|---------------|
| C | 1.2645540231  | 0.0524766527  | -0.7062330137 |
| C | 0.0502993972  | -0.0748901873 | -0.0234950032 |
| C | 0.0441320963  | -0.1273771902 | 1.3490972874  |
| C | 1.2375554295  | -0.0546221349 | 2.0728349262  |
| C | 2.4343188885  | 0.072679343   | 1.3768985174  |
| C | 2.4497227704  | 0.1258413356  | -0.0070557667 |
| O | -1.1121216781 | -0.1460850508 | -0.7073351356 |
| C | 1.2769264545  | -0.1074243716 | 3.5262826442  |
| C | 0.2486385326  | -0.2370918689 | 4.364679402   |
| C | 0.4777797219  | -0.2720917871 | 5.8095263434  |
| O | -0.6789922765 | -0.4114358301 | 6.4962439145  |
| O | 1.1606163922  | 0.0949916197  | -2.0602303407 |
| O | 1.5368308375  | -0.1919467855 | 6.3780138655  |
| H | 2.2613838668  | -0.0328811619 | 3.9755795946  |
| H | -0.7760118587 | -0.3220323695 | 4.0353407843  |
| H | -0.4409375159 | -0.4266973458 | 7.4315763954  |
| H | 2.0202405665  | 0.1797410056  | -2.4794936447 |
| H | -0.929974338  | -0.09686786   | -1.6525450349 |
| H | 3.3853839124  | 0.2247530279  | -0.5425641768 |
| H | 3.3655047772  | 0.1305865873  | 1.9230775545  |
| H | -0.9107389994 | -0.2259536283 | 1.844384887   |

## CAM-B3LYP Caffeic Acid (Neutral) 0.004 a.u.

|   |               |               |               |
|---|---------------|---------------|---------------|
| C | 1.2660836408  | 0.0524823234  | -0.7060730047 |
| C | 0.050883634   | -0.0737802868 | -0.0202106455 |
| C | 0.0472388885  | -0.1254153139 | 1.3517124215  |
| C | 1.2426899019  | -0.0528045076 | 2.0741257286  |
| C | 2.4389196192  | 0.0735392037  | 1.3759673407  |
| C | 2.4527568585  | 0.1256891148  | -0.0079130919 |
| O | -1.1110269338 | -0.1445060872 | -0.7001658744 |
| C | 1.2824977227  | -0.1053665135 | 3.5246418606  |
| C | 0.2525000826  | -0.2362070045 | 4.3647390483  |
| C | 0.4738612181  | -0.2720099725 | 5.8059577096  |
| O | -0.6883180768 | -0.4153817647 | 6.4900765427  |
| O | 1.155427014   | 0.0935082655  | -2.0546834244 |
| O | 1.5262226556  | -0.1905234627 | 6.390432873   |
| H | 2.2673145946  | -0.0301934364 | 3.9733068866  |
| H | -0.7706732569 | -0.3223779133 | 4.0317265884  |
| H | -0.446268317  | -0.4312641104 | 7.4237659346  |
| H | 2.0089356994  | 0.1750296025  | -2.4881434071 |
| H | -0.9350624057 | -0.0980086776 | -1.6473220129 |
| H | 3.3872405334  | 0.2234934122  | -0.5452099053 |
| H | 3.3713026275  | 0.1311625752  | 1.9203720582  |
| H | -0.9074147005 | -0.223393446  | 1.8474803734  |

## CAM-B3LYP Caffeic Acid (Neutral) 0.006 a.u.

|   |               |               |               |
|---|---------------|---------------|---------------|
| C | 1.2677506653  | 0.0524185924  | -0.7061388367 |
| C | 0.0512044673  | -0.0728488754 | -0.0174952259 |
| C | 0.049596881   | -0.1236884138 | 1.3537490654  |
| C | 1.2469186939  | -0.051172359  | 2.0755385192  |
| C | 2.4430172004  | 0.0743512719  | 1.3751374146  |
| C | 2.4558687958  | 0.1255350744  | -0.0084309499 |
| O | -1.1098179383 | -0.1431151467 | -0.6941625246 |
| C | 1.2873557397  | -0.103479998  | 3.5225595187  |
| C | 0.2558521763  | -0.2353681639 | 4.3654263713  |
| C | 0.4703462757  | -0.2719052931 | 5.8025471351  |
| O | -0.6969185091 | -0.4187894106 | 6.4851435302  |
| O | 1.1512215593  | 0.0920482859  | -2.049268279  |
| O | 1.5163785165  | -0.1895124131 | 6.4024983942  |
| H | 2.2726996941  | -0.0277849969 | 3.9703000621  |
| H | -0.7660342487 | -0.3227011375 | 4.0292601917  |
| H | -0.4497992182 | -0.4353341844 | 7.4169197929  |
| H | 1.9985680423  | 0.1710565845  | -2.4965173933 |
| H | -0.9398099301 | -0.098977557  | -1.6431816584 |
| H | 3.389350571   | 0.222319239   | -0.5472357248 |
| H | 3.3763479716  | 0.1317429125  | 1.9182050075  |
| H | -0.904986406  | -0.2211220111 | 1.8497295899  |

CAM-B3LYP Caffeic Acid (Neutral) 0.008 a.u.

|   |               |               |               |
|---|---------------|---------------|---------------|
| C | 1.2695464489  | 0.0524623999  | -0.7064995715 |
| C | 0.0512475017  | -0.0723736319 | -0.0153953756 |
| C | 0.051239362   | -0.1227326742 | 1.3551349566  |
| C | 1.2502536765  | -0.0500932245 | 2.077060272   |
| C | 2.4466307465  | 0.0751017343  | 1.3743334341  |
| C | 2.4590596358  | 0.125664188   | -0.0086154255 |
| O | -1.1084806224 | -0.1424174389 | -0.689357624  |
| C | 1.2915940298  | -0.1022109245 | 3.5199839128  |
| C | 0.2586904044  | -0.2341723411 | 4.3668380875  |
| C | 0.4671553437  | -0.2717245315 | 5.799358773   |
| O | -0.7049438346 | -0.4207689457 | 6.4816565745  |
| O | 1.1480253879  | 0.0909229697  | -2.0439984097 |
| O | 1.5073208418  | -0.189733285  | 6.4144064139  |
| H | 2.2777365256  | -0.0269098605 | 3.9663938935  |
| H | -0.7621922914 | -0.3216270861 | 4.028056692   |
| H | -0.4516255723 | -0.4383752853 | 7.4112234052  |
| H | 1.9891406824  | 0.1687833857  | -2.504648057  |
| H | -0.9442330088 | -0.1001566498 | -1.640163276  |
| H | 3.3916803665  | 0.2217937285  | -0.5486822783 |
| H | 3.3806643756  | 0.1323763978  | 1.9164818169  |
| H | -0.9033989995 | -0.2201369249 | 1.8510157856  |

CAM-B3LYP Caffeic Acid (Neutral) Zero field

|   |               |               |               |
|---|---------------|---------------|---------------|
| C | -0.94856132   | -1.1687461728 | 0.0022859543  |
| C | -1.6834876629 | 0.0074966388  | 0.000491057   |
| C | -1.0359653292 | 1.2343542829  | -0.0038570403 |
| C | 0.3451063174  | 1.2838326904  | -0.0064241657 |
| C | 1.070031208   | 0.1011379735  | -0.0046065721 |
| C | 0.4269830227  | -1.1314500767 | -0.0002440672 |
| O | -3.0402162765 | 0.0078203935  | 0.0028678174  |
| O | -1.7552392469 | 2.3796777232  | -0.0055909745 |
| C | 2.5484713323  | 0.0943099928  | -0.0072334284 |
| O | 3.0898203928  | 1.325173773   | -0.011525006  |
| O | -1.6960119204 | -2.3119708403 | 0.0065919318  |
| O | 3.2292985058  | -0.8970235165 | -0.0059981527 |
| H | 1.0173001516  | -2.0374013609 | 0.0010900009  |
| H | 0.8399712892  | 2.2419946636  | -0.0098142172 |
| H | -1.1310901851 | -3.0878697807 | 0.007864624   |
| H | -3.358892783  | -0.9014456802 | 0.0057901594  |
| H | -2.6942006886 | 2.1637696755  | -0.0033752407 |
| H | 4.0482441926  | 1.2075646209  | -0.0130186801 |

CAM-B3LYP Caffeic Acid (Neutral) 0.010 a.u.

|   |               |               |              |
|---|---------------|---------------|--------------|
| C | -0.9455691348 | -1.1858502332 | 0.0024618572 |
|---|---------------|---------------|--------------|

|   |               |               |               |
|---|---------------|---------------|---------------|
| C | -1.684304843  | -0.0045803419 | 0.000640375   |
| C | -1.0314004523 | 1.2263328042  | -0.003634398  |
| C | 0.3482154468  | 1.2710199866  | -0.0060880368 |
| C | 1.0804539027  | 0.0872905627  | -0.0041912749 |
| C | 0.4314926802  | -1.1479304252 | 0.0000990904  |
| O | -3.0211087092 | 0.0186831866  | 0.0027954127  |
| O | -1.7359397673 | 2.3694531488  | -0.0054188325 |
| C | 2.5405640971  | 0.1056388107  | -0.0067333906 |
| O | 3.076900805   | 1.3542117149  | -0.0122059282 |
| O | -1.6982113641 | -2.3148888353 | 0.006612677   |
| O | 3.2797239824  | -0.8547640793 | -0.0057598844 |
| H | 1.0125710866  | -2.0594852552 | 0.001484306   |
| H | 0.8349578411  | 2.2329755348  | -0.0095173143 |
| H | -1.1616999388 | -3.1099265386 | 0.0072738079  |
| H | -3.4003614898 | -0.8694245958 | 0.0052862124  |
| H | -2.6839068626 | 2.18113282    | -0.0037148638 |
| H | 4.0291837201  | 1.211336735   | -0.0140958151 |

CAM-B3LYP Caffeic Acid (Neutral) 0.002 a.u.

|   |               |               |               |
|---|---------------|---------------|---------------|
| C | -0.9481084058 | -1.1720441545 | 0.0023181835  |
| C | -1.6835094722 | 0.0050644239  | 0.0005314763  |
| C | -1.0350093803 | 1.2325083252  | -0.0038215724 |
| C | 0.3458310105  | 1.2810635203  | -0.0063998763 |
| C | 1.0717092488  | 0.0982028908  | -0.0045844213 |
| C | 0.4278416271  | -1.1347777905 | -0.0002129547 |
| O | -3.0363592417 | 0.0103418189  | 0.0028921551  |
| O | -1.7510067483 | 2.3775281945  | -0.0055550222 |
| C | 2.5467574283  | 0.0965927698  | -0.007238196  |
| O | 3.0868129141  | 1.3308819911  | -0.0116140976 |
| O | -1.6963278654 | -2.3126030974 | 0.0066095545  |
| O | 3.2392148612  | -0.8885346124 | -0.0059034643 |
| H | 1.0161852211  | -2.041868668  | 0.0011188123  |
| H | 0.8390850215  | 2.2399280272  | -0.00981299   |
| H | -1.1366523182 | -3.0920957239 | 0.0077718548  |
| H | -3.3671341091 | -0.8949204438 | 0.0057289283  |
| H | -2.6918105225 | 2.167244415   | -0.0034314603 |
| H | 4.0440417308  | 1.2087131139  | -0.0131029097 |

CAM-B3LYP Caffeic Acid (Neutral) 0.004 a.u.

|   |               |               |               |
|---|---------------|---------------|---------------|
| C | -0.9475974338 | -1.1753855283 | 0.0023493133  |
| C | -1.6836023248 | 0.0026368807  | 0.0005680027  |
| C | -1.0340999994 | 1.2307654102  | -0.0037878475 |
| C | 0.3464957093  | 1.2784050942  | -0.0063723356 |
| C | 1.0735573217  | 0.0953674942  | -0.0045558699 |
| C | 0.4287243818  | -1.1380732084 | -0.0001778034 |
| O | -3.032551091  | 0.0127063992  | 0.0029099813  |

|   |               |               |               |
|---|---------------|---------------|---------------|
| O | -1.7469923911 | 2.375411721   | -0.0055222364 |
| C | 2.5451518023  | 0.098864682   | -0.0072296191 |
| O | 3.0840776186  | 1.3365578903  | -0.0117029014 |
| O | -1.6966969731 | -2.3132137656 | 0.0066257233  |
| O | 3.2491916962  | -0.8800788946 | -0.0058200872 |
| H | 1.0151785652  | -2.0462766526 | 0.0011535366  |
| H | 0.8381136965  | 2.2380043043  | -0.009806411  |
| H | -1.1424483119 | -3.0963945014 | 0.0076784643  |
| H | -3.3754346939 | -0.8884341423 | 0.0056690547  |
| H | -2.68961803   | 2.1706876417  | -0.0034844642 |
| H | 4.0401114574  | 1.2096741754  | -0.0132005005 |

CAM-B3LYP Caffeic Acid (Neutral) 0.006 a.u.

|   |               |               |               |
|---|---------------|---------------|---------------|
| C | -0.9470160763 | -1.1787931107 | 0.002381271   |
| C | -1.6837721484 | 0.000210953   | 0.0006026504  |
| C | -1.0332144827 | 1.2291406363  | -0.0037555841 |
| C | 0.3471105225  | 1.275845169   | -0.006342852  |
| C | 1.0756133943  | 0.0926120934  | -0.0045222014 |
| C | 0.4296321931  | -1.1413505956 | -0.0001381164 |
| O | -3.0287577647 | 0.0148954118  | 0.0029245219  |
| O | -1.7431626562 | 2.3733390037  | -0.005492337  |
| C | 2.5436186021  | 0.1011301831  | -0.0072105388 |
| O | 3.0815654674  | 1.3422842299  | -0.0117906785 |
| O | -1.6971172525 | -2.3138047547 | 0.0066443112  |
| O | 3.2592654228  | -0.8716302662 | -0.0057478845 |
| H | 1.0142484073  | -2.0506652137 | 0.0011955916  |
| H | 0.8370756904  | 2.2362112049  | -0.0097975236 |
| H | -1.1485253572 | -3.1007988314 | 0.0075774944  |
| H | -3.3837966366 | -0.8819929716 | 0.0056103155  |
| H | -2.6875954319 | 2.174147168   | -0.0035366052 |
| H | 4.0363891066  | 1.2104446906  | -0.0133078344 |

CAM-B3LYP Caffeic Acid (Neutral) 0.008 a.u.

|   |               |               |               |
|---|---------------|---------------|---------------|
| C | -0.9463444116 | -1.1822775862 | 0.0024163911  |
| C | -1.6840054385 | -0.0022007215 | 0.0006315388  |
| C | -1.0323203695 | 1.2276539871  | -0.0037154318 |
| C | 0.3476867032  | 1.2733836233  | -0.0062821723 |
| C | 1.0779038228  | 0.0899234315  | -0.0044449694 |
| C | 0.4305606894  | -1.1446307172 | -0.0000713099 |
| O | -3.024951408  | 0.0168926592  | 0.0029130117  |
| O | -1.7394833378 | 2.3713428693  | -0.0054618549 |
| C | 2.5421037955  | 0.1033903676  | -0.0071169206 |
| O | 3.079188632   | 1.3481447328  | -0.0119152187 |
| O | -1.6976100285 | -2.3143719889 | 0.0066539036  |
| O | 3.2694358086  | -0.863190659  | -0.0057049063 |
| H | 1.0133870396  | -2.0550593219 | 0.0012738361  |



|   |               |               |               |
|---|---------------|---------------|---------------|
| H | 0.836016006   | 2.2345368945  | -0.0097469255 |
| H | -1.1549270928 | -3.1053172011 | 0.0074549862  |
| H | -3.392144044  | -0.8756372109 | 0.0055204541  |
| H | -2.6857020942 | 2.177635862   | -0.0036000492 |
| H | 4.0327667276  | 1.2110059793  | -0.0135103631 |

CAM-B3LYP Caffeic Acid (Radical) Zero field

|   |               |               |               |
|---|---------------|---------------|---------------|
| C | 1.2493459151  | 0.055562219   | -0.7566653783 |
| C | 0.0017085253  | -0.0817348139 | 0.0002484367  |
| C | -0.0106418553 | -0.1368626485 | 1.3653761068  |
| C | 1.1971203324  | -0.0606779982 | 2.0716687855  |
| C | 2.4247369612  | 0.0735754729  | 1.3574347918  |
| C | 2.4669601491  | 0.1305001165  | 0.0059244314  |
| O | -1.1021484797 | -0.1479333884 | -0.7288978641 |
| C | 1.2643404518  | -0.1119697451 | 3.5107050066  |
| C | 0.2385917699  | -0.2365022605 | 4.3619763067  |
| C | 0.4902932681  | -0.2720553899 | 5.8110037325  |
| O | -0.652891487  | -0.4016886619 | 6.5085600385  |
| O | 1.1764236181  | 0.0978126054  | -1.9882947013 |
| O | 1.5656664391  | -0.1974160717 | 6.3419582935  |
| H | 2.2525674437  | -0.0423071402 | 3.9509799163  |
| H | -0.7904866538 | -0.3150789228 | 4.044930176   |
| H | -0.4171484229 | -0.4182734061 | 7.4454780183  |
| H | -0.8108752295 | -0.08619591   | -1.6583491242 |
| H | 3.3940769648  | 0.2321464963  | -0.5393938228 |
| H | 3.3403896446  | 0.1301896245  | 1.9306254299  |
| H | -0.956377355  | -0.2385711774 | 1.87650442    |

CAM-B3LYP Caffeic Acid (Radical) 0.010 a.u.

|   |               |               |               |
|---|---------------|---------------|---------------|
| C | 1.252194144   | 0.0557117098  | -0.7610691044 |
| C | -0.0040227474 | -0.0816134185 | 0.0041656712  |
| C | -0.0043456924 | -0.1353265287 | 1.3728387733  |
| C | 1.2084990069  | -0.0595254072 | 2.0711189627  |
| C | 2.4401237577  | 0.0725649799  | 1.3498760882  |
| C | 2.4806135022  | 0.128568751   | 0.0018814623  |
| O | -1.1070391065 | -0.146884787  | -0.7019604089 |
| C | 1.2793029142  | -0.1078654658 | 3.5005103979  |
| C | 0.2515060587  | -0.2345295336 | 4.3672961266  |
| C | 0.4771032846  | -0.2684274986 | 5.7955137952  |
| O | -0.6867430235 | -0.4109261787 | 6.4954970085  |
| O | 1.177408254   | 0.1024256695  | -1.9783608016 |
| O | 1.5257579038  | -0.1882612445 | 6.3978865067  |
| H | 2.2717816083  | -0.0348817292 | 3.9314451453  |
| H | -0.7736259968 | -0.3186973859 | 4.0412944376  |
| H | -0.4161405227 | -0.4266990597 | 7.4199640631  |
| H | -0.8617051887 | -0.0911502063 | -1.647667078  |

|   |               |               |               |
|---|---------------|---------------|---------------|
| H | 3.4018649637  | 0.227210238   | -0.5542232007 |
| H | 3.3584394107  | 0.1268982543  | 1.9199363663  |
| H | -0.9493205308 | -0.2360721586 | 1.8858287886  |

CAM-B3LYP Caffeic Acid (Radical) 0.002 a.u.

|   |               |               |               |
|---|---------------|---------------|---------------|
| C | 1.2491420829  | 0.0559541502  | -0.7569942156 |
| C | 0.0008502176  | -0.0816729666 | 0.0018942782  |
| C | -0.0079185864 | -0.1366111331 | 1.3678595501  |
| C | 1.2010878277  | -0.0603784774 | 2.0711187544  |
| C | 2.4285525886  | 0.0733078763  | 1.3556996958  |
| C | 2.4692922133  | 0.1300853978  | 0.0044833672  |
| O | -1.1038665841 | -0.1477207918 | -0.7213405817 |
| C | 1.2686213137  | -0.1111128979 | 3.5096348533  |
| C | 0.2422660517  | -0.2361099823 | 4.3618319803  |
| C | 0.4870605462  | -0.2712177264 | 5.8076201086  |
| O | -0.6608739143 | -0.4039994468 | 6.5035457672  |
| O | 1.1753022193  | 0.098272343   | -1.9859248975 |
| O | 1.5563560986  | -0.1947630163 | 6.3538808952  |
| H | 2.2574678178  | -0.0405994078 | 3.948468601   |
| H | -0.7856894416 | -0.3158873317 | 4.0420751792  |
| H | -0.4202254209 | -0.4202460544 | 7.4385356613  |
| H | -0.822693637  | -0.0868593778 | -1.6543412506 |
| H | 3.3948283308  | 0.2309216516  | -0.5436203402 |
| H | 3.345247745   | 0.1293718416  | 1.9274216736  |
| H | -0.9531554689 | -0.2382156502 | 1.8799239201  |

CAM-B3LYP Caffeic Acid (Radical) 0.004 a.u.

|   |               |               |               |
|---|---------------|---------------|---------------|
| C | 1.2492841105  | 0.0563450611  | -0.7575659834 |
| C | -0.0001575459 | -0.0816275057 | 0.0031193808  |
| C | -0.0058727688 | -0.136326555  | 1.3698426981  |
| C | 1.2042825308  | -0.0600550279 | 2.0707870829  |
| C | 2.4320280134  | 0.0730874519  | 1.3541616272  |
| C | 2.47179098    | 0.1296725181  | 0.0033929362  |
| O | -1.1052478236 | -0.1475131588 | -0.714823866  |
| C | 1.2722427581  | -0.1102231271 | 3.5080876942  |
| C | 0.2453983317  | -0.2357316482 | 4.362234171   |
| C | 0.4841589955  | -0.2704730229 | 5.8043783415  |
| O | -0.6681894488 | -0.406163378  | 6.4996175246  |
| O | 1.1748889077  | 0.0987381896  | -1.9837380902 |
| O | 1.5476939058  | -0.1924186447 | 6.3653533731  |
| H | 2.2618281222  | -0.0388950505 | 3.9452812781  |
| H | -0.7816017548 | -0.3167247232 | 4.040237859   |
| H | -0.4217552199 | -0.422110503  | 7.4324656441  |
| H | -0.8338086718 | -0.0875531206 | -1.651198619  |
| H | 3.3959342604  | 0.2296921062  | -0.5472264559 |
| H | 3.3495415276  | 0.1286060581  | 1.9247992097  |

H -0.9507872102 -0.2378069195 1.8825671942

CAM-B3LYP Caffeic Acid (Radical) 0.006 a.u.

C 1.2499464716 0.0557524109 -0.7583434191  
C -0.0012535561 -0.0815218661 0.003908772  
C -0.0047894336 -0.135778665 1.3712171995  
C 1.2063806078 -0.059810999 2.0707302453  
C 2.4349364941 0.0728220043 1.3527810486  
C 2.4744572049 0.1291196687 0.0026998938  
O -1.1062134027 -0.1471364884 -0.7096884753  
C 1.2750521609 -0.1093487995 3.5060104586  
C 0.2478077485 -0.2354023812 4.3632765796  
C 0.4816708122 -0.2697730816 5.8012339649  
O -0.6746198858 -0.4081728034 6.4970864847  
O 1.1751353397 0.1000234059 -1.9816728557  
O 1.539909902 -0.1904896511 6.3762201455  
H 2.2654283357 -0.0372624654 3.9414317854  
H -0.7783962566 -0.317645648 4.0396256754  
H -0.4210862947 -0.42386302 7.427447936  
H -0.8434894783 -0.0888998593 -1.6492254778  
H 3.3974592423 0.228701642 -0.5499990845  
H 3.3529407168 0.1280041166 1.9228282332  
H -0.9496247288 -0.2367985204 1.88420389

CAM-B3LYP Caffeic Acid (Radical) 0.008 a.u.

C 1.2508442938 0.0556366487 -0.7594749001  
C -0.0025580159 -0.0815452426 0.0043016097  
C -0.0041328385 -0.1355091533 1.372299323  
C 1.2079859034 -0.0596412765 2.0708232692  
C 2.437765699 0.0726685764 1.3513700964  
C 2.477393116 0.1288021152 0.0021562682  
O -1.1068742811 -0.1470049968 -0.7051827112  
C 1.2775152846 -0.1085826212 3.5034970642  
C 0.2499307818 -0.2349098515 4.3648727934  
C 0.4792354761 -0.2690474289 5.7982551137  
O -0.6809373516 -0.4096881309 6.4955268268  
O 1.175947637 0.1012529511 -1.9798642615  
O 1.5324688996 -0.1892346057 6.3870996804  
H 2.2688764962 -0.0360278602 3.9368345174  
H -0.7756494052 -0.3180986415 4.0397899217  
H -0.4195406545 -0.4254238001 7.4231502329  
H -0.853151312 -0.0901212634 -1.6478731921  
H 3.3993860476 0.2279190429 -0.5524301861  
H 3.3560903079 0.127446584 1.9211582356  
H -0.948944084 -0.2363720458 1.8854632985

## CAM-B3LYP Caffeic Acid (Radical) Zero field

|   |               |               |               |
|---|---------------|---------------|---------------|
| C | -0.94310069   | -1.2145975887 | 0.0032146987  |
| C | -1.7421942992 | -0.0019721197 | 0.0015893517  |
| C | -1.0142960317 | 1.2618810159  | -0.0033691905 |
| C | 0.3558668917  | 1.3135540722  | -0.0063964912 |
| C | 1.0619970561  | 0.1125512083  | -0.0046300677 |
| C | 0.4204509612  | -1.136428876  | 0.0001187635  |
| O | -2.9757806872 | 0.0238807117  | 0.0040908476  |
| O | -1.7702870533 | 2.3499593565  | -0.004733705  |
| C | 2.5452547816  | 0.0948858884  | -0.0077387507 |
| O | 3.0918160077  | 1.3199209775  | -0.0122296631 |
| O | -1.6386404938 | -2.3568621066 | 0.007808614   |
| O | 3.2093530949  | -0.9062893384 | -0.006427639  |
| H | 1.0340453455  | -2.0271704248 | 0.0012561428  |
| H | 0.8685451836  | 2.2619694113  | -0.0100598479 |
| H | -1.0445787032 | -3.1134699678 | 0.0086820243  |
| H | -2.6941697178 | 2.0373939604  | -0.0019459715 |
| H | 4.0508103539  | 1.2039168198  | -0.0139341158 |

## CAM-B3LYP Caffeic Acid (Radical) 0.010 a.u.

|   |               |               |               |
|---|---------------|---------------|---------------|
| C | -0.9396065785 | -1.2289930917 | 0.0032974462  |
| C | -1.7429957597 | -0.0083643955 | 0.001838864   |
| C | -1.0136869229 | 1.2604481781  | -0.0033640092 |
| C | 0.358530937   | 1.3036393707  | -0.0064513999 |
| C | 1.0688786182  | 0.1011252856  | -0.0046054572 |
| C | 0.4260865232  | -1.1525723932 | 0.0001981008  |
| O | -2.965337766  | 0.0104824041  | 0.0044558077  |
| O | -1.7505400062 | 2.3508187811  | -0.004789171  |
| C | 2.5353416124  | 0.106078857   | -0.0077111611 |
| O | 3.0814535872  | 1.3464157312  | -0.0125090278 |
| O | -1.649288902  | -2.3513107688 | 0.0077746125  |
| O | 3.2546852689  | -0.8670460097 | -0.0058682503 |
| H | 1.0319328256  | -2.0480562417 | 0.0013057887  |
| H | 0.865814484   | 2.2546161178  | -0.0102727094 |
| H | -1.0907167424 | -3.1338928771 | 0.0082079893  |
| H | -2.6891187444 | 2.0784925608  | -0.0020925292 |
| H | 4.0336595657  | 1.2012414911  | -0.0141198941 |

## CAM-B3LYP Caffeic Acid (Radical) 0.002 a.u.

|   |               |               |               |
|---|---------------|---------------|---------------|
| C | -0.9425740938 | -1.2172750562 | 0.0032292207  |
| C | -1.7421699336 | -0.0031818108 | 0.00163411    |
| C | -1.0141187564 | 1.2613747793  | -0.0033628424 |
| C | 0.3565060745  | 1.3113018878  | -0.0063940684 |
| C | 1.0630000239  | 0.1100675624  | -0.0046086742 |
| C | 0.4215377954  | -1.1395803794 | 0.0001416826  |
| O | -2.9735294093 | 0.0214310929  | 0.0041385912  |

|   |               |               |               |
|---|---------------|---------------|---------------|
| O | -1.7659905872 | 2.3501210199  | -0.0047410575 |
| C | 2.5431857052  | 0.0970450362  | -0.0077018096 |
| O | 3.089270937   | 1.3250571769  | -0.0123114502 |
| O | -1.6406681859 | -2.3557650314 | 0.0077904098  |
| O | 3.2183208312  | -0.8984238529 | -0.0063032244 |
| H | 1.0333482685  | -2.0313762547 | 0.0012778738  |
| H | 0.8680895193  | 2.2601924201  | -0.0100820073 |
| H | -1.0531667495 | -3.1173163473 | 0.0085783878  |
| H | -2.6929085143 | 2.0456651115  | -0.0019766667 |
| H | 4.046959075   | 1.2037856455  | -0.014013475  |

CAM-B3LYP Caffeic Acid (Radical) 0.004 a.u.

|   |               |               |               |
|---|---------------|---------------|---------------|
| C | -0.941971481  | -1.2202240577 | 0.0032512009  |
| C | -1.7423558759 | -0.0044238442 | 0.0017127485  |
| C | -1.0139790293 | 1.2610985351  | -0.0034106297 |
| C | 0.3572489833  | 1.3089543397  | -0.006628105  |
| C | 1.0643233657  | 0.1074261038  | -0.0049122611 |
| C | 0.4227509918  | -1.1429942888 | -0.0000174193 |
| O | -2.9713225957 | 0.0186979438  | 0.004511704   |
| O | -1.761535803  | 2.3502207623  | -0.0047326236 |
| C | 2.5413361486  | 0.0991988042  | -0.0082198847 |
| O | 3.0864404458  | 1.3305535452  | -0.012121733  |
| O | -1.6427098372 | -2.3545028355 | 0.0079382231  |
| O | 3.2273970826  | -0.8906176909 | -0.0060415576 |
| H | 1.0328083006  | -2.0358767779 | 0.0010653752  |
| H | 0.8678274951  | 2.2583289739  | -0.0104280951 |
| H | -1.0624724981 | -3.1213388792 | 0.0086176602  |
| H | -2.6914783514 | 2.0544117905  | -0.0019037152 |
| H | 4.0427846583  | 1.2042105758  | -0.0133858877 |

CAM-B3LYP Caffeic Acid (Radical) 0.006 a.u.

|   |               |               |               |
|---|---------------|---------------|---------------|
| C | -0.9412489318 | -1.223072423  | 0.0032569286  |
| C | -1.742464293  | -0.0057117574 | 0.001728995   |
| C | -1.0139284514 | 1.2607426527  | -0.0034006141 |
| C | 0.3577271037  | 1.3069319482  | -0.0066065036 |
| C | 1.0656895424  | 0.1051289485  | -0.0048780953 |
| C | 0.423919449   | -1.1462165414 | 0.0000106209  |
| O | -2.9691720549 | 0.0161212536  | 0.0045774907  |
| O | -1.7577579475 | 2.3502421128  | -0.0047395017 |
| C | 2.5393135884  | 0.1014856581  | -0.0081504372 |
| O | 3.0846000019  | 1.3357957052  | -0.0122009492 |
| O | -1.6448115751 | -2.3533013878 | 0.0079130272  |
| O | 3.2365692146  | -0.8826220849 | -0.0059470992 |
| H | 1.0323693574  | -2.0400743882 | 0.0010977709  |
| H | 0.8671115843  | 2.2568654918  | -0.01041779   |
| H | -1.0716873165 | -3.125342132  | 0.0085234508  |

H -2.6907253661 2.062727876 -0.0019653658  
H 4.0395880946 1.2034220679 -0.013506928

CAM-B3LYP Caffeic Acid (Radical) 0.008 a.u.

C -0.9405033267 -1.2258822918 0.0032781558  
C -1.7426326507 -0.0070141739 0.0017806996  
C -1.0137680293 1.2604891418 -0.0033597174  
C 0.3581111327 1.3053385131 -0.006427197  
C 1.0671179263 0.1031966227 -0.0045949551  
C 0.4249307723 -1.1492633258 0.0001885019  
O -2.9672955997 0.0133913517 0.0043606095  
O -1.7541208177 2.3506474995 -0.004774131  
C 2.5372547753 0.1037535018 -0.0076872383  
O 3.0830156142 1.340934454 -0.0124828676  
O -1.6470549887 -2.352442286 0.0077708889  
O 3.2454950659 -0.8748771778 -0.0059612847  
H 1.0320807664 -2.0439165388 0.001307607  
H 0.8664460071 2.2557752857 -0.0102096698  
H -1.0807845202 -3.1295475086 0.0082954775  
H -2.6898483442 2.070344117 -0.0020672066  
H 4.0366482169 1.2021958156 -0.0141226726

$\omega$ B97X Caffeic Acid (Neutral) -0.010 a.u.

C 1.2562928518 0.0681854599 -0.7131242302  
C 0.0483189992 -0.1484864109 -0.0578041034  
C 0.0237126945 -0.2508723828 1.3192129092  
C 1.2006944911 -0.1372471965 2.0628911637  
C 2.4009529135 0.069067256 1.3855597847  
C 2.4297932471 0.1743187314 0.0038902412  
O -1.1075745761 -0.2623580101 -0.7776393129  
C 1.239337728 -0.2219500292 3.5294677167  
C 0.2160338951 -0.1844640751 4.3736443439  
C 0.503356031 -0.2671820522 5.8374890183  
O -0.6163774792 -0.1952725324 6.5582173623  
O 1.2011579098 0.1601973842 -2.0973915796  
O 1.6046515594 -0.3809209822 6.2966188013  
H 2.2261682703 -0.3041324158 3.9779301227  
H -0.8200538405 -0.0812505516 4.0735556801  
H -0.3847647404 -0.2445518807 7.4965360238  
H 2.0668033233 0.4246593028 -2.4068052349  
H -0.8870766356 -0.13093856 -1.7019376049  
H 3.3709532764 0.3383385363 -0.5135828799  
H 3.3204122196 0.1541430591 1.9512940541  
H -0.9276811383 -0.4256106502 1.8065617236

$\omega$ B97X Caffeic Acid (Neutral) -0.002 a.u.

|   |               |               |               |
|---|---------------|---------------|---------------|
| C | 1.2619906166  | 0.0499597759  | -0.7120220462 |
| C | 0.0462317589  | -0.0732307947 | -0.0332513088 |
| C | 0.0357181897  | -0.1245186166 | 1.343548095   |
| C | 1.2287393053  | -0.0547194796 | 2.0688792099  |
| C | 2.4286365923  | 0.0687300372  | 1.3768017472  |
| C | 2.4473199235  | 0.1204504757  | -0.010324381  |
| O | -1.119215835  | -0.1411156205 | -0.7241466588 |
| C | 1.2666702961  | -0.1049932602 | 3.5335726877  |
| C | 0.2379632759  | -0.2459537271 | 4.365447039   |
| C | 0.4831868705  | -0.2715412564 | 5.8229790588  |
| O | -0.6614008281 | -0.4182471415 | 6.5147229414  |
| O | 1.1718329334  | 0.0935102028  | -2.0777297317 |
| O | 1.5559701613  | -0.1759222105 | 6.3583967523  |
| H | 2.2498437404  | -0.0165410924 | 3.9886947918  |
| H | -0.7892292124 | -0.3461930046 | 4.038911771   |
| H | -0.4272648467 | -0.4254112673 | 7.4505672604  |
| H | 2.0444155742  | 0.1835200257  | -2.4616450466 |
| H | -0.9220318208 | -0.0878621227 | -1.6632629174 |
| H | 3.3874399907  | 0.217007255   | -0.5435439175 |
| H | 3.3598335628  | 0.1250368086  | 1.9272137673  |
| H | -0.9215392488 | -0.2182929868 | 1.8407748863  |

ωB97X Caffeic Acid (Neutral) -0.004 a.u.

|   |               |               |               |
|---|---------------|---------------|---------------|
| C | 1.2609316525  | 0.0498820373  | -0.7127516891 |
| C | 0.0451619335  | -0.0759249405 | -0.0381075621 |
| C | 0.0306700852  | -0.1290146047 | 1.3392813816  |
| C | 1.2211352646  | -0.0584302485 | 2.0678979298  |
| C | 2.4225938301  | 0.0673361513  | 1.3781812603  |
| C | 2.4444126692  | 0.1209543156  | -0.00841285   |
| O | -1.119649447  | -0.1446001641 | -0.734760168  |
| C | 1.259072637   | -0.1090393791 | 3.5339187236  |
| C | 0.2324692837  | -0.2462149684 | 4.3670676288  |
| C | 0.4884236581  | -0.2711639945 | 5.8268520125  |
| O | -0.6501202696 | -0.4100521751 | 6.5242791644  |
| O | 1.179541786   | 0.0957822248  | -2.0835308379 |
| O | 1.5687902097  | -0.1800830168 | 6.3447325483  |
| H | 2.2425339947  | -0.0234512676 | 3.9888705857  |
| H | -0.7970259328 | -0.3427606765 | 4.0459436727  |
| H | -0.4168228145 | -0.4170574702 | 7.461037427   |
| H | 2.0573337899  | 0.1950284161  | -2.4521871009 |
| H | -0.9153159262 | -0.0867839574 | -1.6715596099 |
| H | 3.3862047697  | 0.2196216585  | -0.538939993  |
| H | 3.3519010545  | 0.1243008603  | 1.9315275066  |
| H | -0.9271312281 | -0.2246568004 | 1.8352439696  |

ωB97X Caffeic Acid (Neutral) -0.006 a.u.

|   |               |               |               |
|---|---------------|---------------|---------------|
| C | 1.2599879305  | 0.0511409376  | -0.7136295338 |
| C | 0.0442753046  | -0.0825939416 | -0.0437891648 |
| C | 0.0254047599  | -0.1403659908 | 1.3340731222  |
| C | 1.2128542511  | -0.0665572856 | 2.0667720938  |
| C | 2.4158536017  | 0.0661665675  | 1.3798354624  |
| C | 2.4412178521  | 0.1247898828  | -0.0059934714 |
| O | -1.1192399305 | -0.154733646  | -0.7470106794 |
| C | 1.2510126927  | -0.1193650753 | 3.5336745801  |
| C | 0.2260291302  | -0.2433687965 | 4.3693889649  |
| C | 0.4941995209  | -0.2708045992 | 5.8309400671  |
| O | -0.6386967089 | -0.3892542403 | 6.5355385934  |
| O | 1.1879433768  | 0.1021730738  | -2.0894092712 |
| O | 1.5834655364  | -0.1963720964 | 6.3299833794  |
| H | 2.235764662   | -0.0456445648 | 3.9878925676  |
| H | -0.8069949365 | -0.3255631632 | 4.0548431719  |
| H | -0.4049957027 | -0.3985443666 | 7.4729259781  |
| H | 2.0700513707  | 0.2177763577  | -2.4419424608 |
| H | -0.9076996273 | -0.087416572  | -1.6810795972 |
| H | 3.3845877875  | 0.2293969789  | -0.5332676544 |
| H | 3.34285897    | 0.1253204737  | 1.9366471324  |
| H | -0.9327688411 | -0.2425079337 | 1.8281907196  |

ωB97X Caffeic Acid (Neutral) -0.008 a.u.

|   |               |               |               |
|---|---------------|---------------|---------------|
| C | 1.2560905161  | 0.0730858659  | -0.7122781683 |
| C | 0.0475075628  | -0.1302977788 | -0.0506793702 |
| C | 0.0279742522  | -0.2253179742 | 1.3260761413  |
| C | 1.2091617241  | -0.1187374732 | 2.0642134571  |
| C | 2.4080030399  | 0.0756712703  | 1.3830271226  |
| C | 2.4325903     | 0.1745620556  | 0.0001231477  |
| O | -1.1110692662 | -0.2389490376 | -0.7621864078 |
| C | 1.2483272509  | -0.2009640628 | 3.53052894    |
| C | 0.2211097529  | -0.1925099759 | 4.371462436   |
| C | 0.4979392267  | -0.2733632302 | 5.8334338141  |
| O | -0.6309512229 | -0.2349847873 | 6.5476886954  |
| O | 1.1906399096  | 0.1560629225  | -2.0916339053 |
| O | 1.5949287698  | -0.3601689038 | 6.3107335779  |
| H | 2.236258563   | -0.2601923071 | 3.9800059144  |
| H | -0.8152979507 | -0.1172399547 | 4.0652855027  |
| H | -0.3984546127 | -0.2836433069 | 7.4849653407  |
| H | 2.0672903386  | 0.3476220911  | -2.4234979463 |
| H | -0.8964933367 | -0.1326531905 | -1.6914738201 |
| H | 3.3724757344  | 0.3300505867  | -0.5215488648 |
| H | 3.3307405676  | 0.1558379149  | 1.9441942424  |
| H | -0.9236601192 | -0.3901987241 | 1.8161441505  |

ωB97X Gallic Acid (Neutral) -0.010 a.u.



|   |               |               |               |
|---|---------------|---------------|---------------|
| C | -0.9523936536 | -1.1554604943 | 0.0021125216  |
| C | -1.6886174495 | 0.0191244326  | 0.0003233448  |
| C | -1.0447317474 | 1.2467618414  | -0.0040444391 |
| C | 0.3404412296  | 1.3024354943  | -0.0066246444 |
| C | 1.0637174807  | 0.1182465719  | -0.0047866238 |
| C | 0.4238277908  | -1.1158808113 | -0.0004206313 |
| O | -3.0658854015 | -0.0061021268 | 0.0028626024  |
| O | -1.7833147759 | 2.3936421077  | -0.0057311212 |
| C | 2.5634930848  | 0.0827639431  | -0.0072818224 |
| O | 3.113577466   | 1.297116116   | -0.011301029  |
| O | -1.6961064259 | -2.3129747938 | 0.00645309    |
| O | 3.1848622516  | -0.9416291868 | -0.0059637084 |
| H | 1.0278383811  | -2.0167358471 | 0.0008846179  |
| H | 0.8435971553  | 2.2597721984  | -0.0099922199 |
| H | -1.1021020056 | -3.0659331994 | 0.0081150246  |
| H | -3.3221665647 | -0.9323330915 | 0.0062243774  |
| H | -2.7099541695 | 2.144192629   | -0.0029759367 |
| H | 4.0754783538  | 1.1942192168  | -0.0125594023 |

$\omega$ B97X Gallic Acid (Neutral) -0.002 a.u.

|   |               |               |               |
|---|---------------|---------------|---------------|
| C | -0.9514586139 | -1.1680276895 | 0.0022813591  |
| C | -1.6878537093 | 0.009452817   | 0.0005227098  |
| C | -1.0404617856 | 1.2382164478  | -0.0038471078 |
| C | 0.3439651034  | 1.2898212291  | -0.0064468052 |
| C | 1.0679395662  | 0.1051837992  | -0.0046157218 |
| C | 0.4268341877  | -1.1294774279 | -0.0002386438 |
| O | -3.0500197277 | 0.005491077   | 0.0029339795  |
| O | -1.7632026326 | 2.3851012178  | -0.0055676497 |
| C | 2.5555807771  | 0.0917996206  | -0.0072216489 |
| O | 3.0980319332  | 1.319627942   | -0.0117155729 |
| O | -1.6968640512 | -2.3155925206 | 0.0065129569  |
| O | 3.2234213775  | -0.908184359  | -0.0056638009 |
| H | 1.0213981024  | -2.0356476589 | 0.001065143   |
| H | 0.8409561802  | 2.2496660958  | -0.0098987554 |
| H | -1.1212024722 | -3.0816089538 | 0.0077273383  |
| H | -3.3531274012 | -0.9069897183 | 0.0058241075  |
| H | -2.6976947978 | 2.1595822915  | -0.003305747  |
| H | 4.0553189639  | 1.2028107902  | -0.0130521407 |

$\omega$ B97X Gallic Acid (Neutral) -0.004 a.u.

|   |               |               |               |
|---|---------------|---------------|---------------|
| C | -0.9517278738 | -1.1648005635 | 0.0022439331  |
| C | -1.6879206094 | 0.0119122832  | 0.0004798103  |
| C | -1.0414728443 | 1.2402990746  | -0.0038916725 |
| C | 0.3431356876  | 1.2928819028  | -0.0064902534 |
| C | 1.0666545159  | 0.1083628833  | -0.0046598382 |
| C | 0.4260517053  | -1.1260962592 | -0.0002837009 |

O -3.0538454235 0.0025795668 0.0029222594  
O -1.7679396672 2.3872723575 -0.0056050533  
C 2.5573563758 0.0895272995 -0.0072448576  
O 3.1015572417 1.31399994 -0.0116104967  
O -1.6966889639 -2.3148289639 0.0065008947  
O 3.2136029129 -0.9166300796 -0.0057393193  
H 1.0229151335 -2.0309430094 0.0010187165  
H 0.841718846 2.2520491409 -0.0099233241  
H -1.1163525433 -3.0775511998 0.0078234057  
H -3.3449361204 -0.9136299354 0.0059127128  
H -2.7005220977 2.1559211751 -0.0032351632  
H 4.0599747248 1.2008993871 -0.0129240533

ωB97X Gallic Acid (Neutral) -0.006 a.u.

C -0.951965661 -1.16164343 0.0022032692  
C -1.6880685834 0.014335591 0.0004322765  
C -1.0425304246 1.2424225003 -0.0039387474  
C 0.3422593225 1.2960324792 -0.0065329279  
C 1.0655139821 0.11162798 -0.0047013287  
C 0.4252979408 -1.1226836922 -0.000328347  
O -3.0577623332 -0.0002979894 0.0029054961  
O -1.7729007471 2.3894109252 -0.0056442054  
C 2.5592531496 0.0872489958 -0.0072587775  
O 3.1053506116 1.3083321718 -0.0115097887  
O -1.6964685132 -2.3141664608 0.0064859459  
O 3.2038395613 -0.9250738487 -0.0058120117  
H 1.0245803534 -2.0261572537 0.0009736253  
H 0.8423919042 2.2545606595 -0.0099449881  
H -1.1114939995 -3.0735979382 0.0079190934  
H -3.3371106748 -0.9200133843 0.0060070384  
H -2.7035360155 2.1521080881 -0.0031570198  
H 4.0649111267 1.1987796064 -0.0128046027

ωB97X Gallic Acid (Neutral) -0.008 a.u.

C -0.9521848454 -1.1585560014 0.0021593411  
C -1.6883024662 0.0167188637 0.0003806448  
C -1.0436131586 1.2445596926 -0.0039897496  
C 0.341359161 1.2992183363 -0.0065788942  
C 1.0645356294 0.1149263652 -0.0047452159  
C 0.424559917 -1.1192750359 -0.0003752586  
O -3.0617765618 -0.0031130331 0.0028868272  
O -1.7780326199 2.3915092037 -0.0056857366  
C 2.5612853358 0.0849915397 -0.0072732764  
O 3.1093580443 1.3027001486 -0.0114070997  
O -1.6962116653 -2.3136116002 0.0064703816  
O 3.1942382407 -0.9334179313 -0.0058827981

|   |               |               |               |
|---|---------------|---------------|---------------|
| H | 1.0262561663  | -2.0213994543 | 0.0009267113  |
| H | 0.8430090208  | 2.2571397422  | -0.0099694907 |
| H | -1.1066302083 | -3.0697484892 | 0.0080160291  |
| H | -3.329681466  | -0.9261105158 | 0.0061118803  |
| H | -2.7066842997 | 2.1481610011  | -0.0030700896 |
| H | 4.0700767759  | 1.1965321681  | -0.0126802061 |

ωB97X Caffiec Acid (Radical) -0.010 a.u.

|   |               |               |               |
|---|---------------|---------------|---------------|
| C | 1.2557918512  | 0.0557514715  | -0.7635758203 |
| C | 0.0029113473  | -0.0812671837 | -0.0177651902 |
| C | -0.0340385309 | -0.1381190365 | 1.3445909878  |
| C | 1.1699179639  | -0.0626927696 | 2.0760985619  |
| C | 2.4058159169  | 0.0738910178  | 1.3681051145  |
| C | 2.4616952878  | 0.1313317599  | 0.0138215294  |
| O | -1.0957260385 | -0.1460915672 | -0.7819787476 |
| C | 1.2355737931  | -0.115474809  | 3.5138545945  |
| C | 0.2093656851  | -0.2425645912 | 4.3704889824  |
| C | 0.508449593   | -0.2760550431 | 5.8361145202  |
| O | -0.6055596768 | -0.391544147  | 6.5534871686  |
| O | 1.1963844964  | 0.0957009403  | -2.0095553807 |
| O | 1.6186391107  | -0.2060156096 | 6.2803909065  |
| H | 2.2217692682  | -0.0445473266 | 3.964718309   |
| H | -0.828093851  | -0.322907442  | 4.0694177768  |
| H | -0.3779894265 | -0.4058167728 | 7.4946149434  |
| H | -0.7534999638 | -0.0787754059 | -1.6893298848 |
| H | 3.4008760632  | 0.2358900259  | -0.5147490056 |
| H | 3.3156376676  | 0.1316499074  | 1.9541525475  |
| H | -0.9862685569 | -0.2398244187 | 1.8488710867  |

ωB97X Caffeic Acid (Radical) -0.002 a.u.

|   |               |               |               |
|---|---------------|---------------|---------------|
| C | 1.2504355839  | 0.0535940923  | -0.7634593481 |
| C | -0.0001221487 | -0.078974121  | -0.0047407476 |
| C | -0.0150185045 | -0.1328969519 | 1.3628288851  |
| C | 1.1952178554  | -0.0590916893 | 2.0708702786  |
| C | 2.4262968424  | 0.0713600074  | 1.3569644333  |
| C | 2.4703763283  | 0.1258141772  | 0.0029433065  |
| O | -1.1069458363 | -0.1417355134 | -0.7373803906 |
| C | 1.261599427   | -0.1082643201 | 3.5164738718  |
| C | 0.2322940833  | -0.2425573522 | 4.3625412855  |
| C | 0.4906499018  | -0.2714733103 | 5.8205726494  |
| O | -0.6472291996 | -0.4109750592 | 6.5186465075  |
| O | 1.1805133338  | 0.0949869183  | -1.9974600128 |
| O | 1.5724456715  | -0.1827770915 | 6.3360739586  |
| H | 2.2488445452  | -0.0276734856 | 3.9628714209  |
| H | -0.7979346958 | -0.3345495154 | 4.043943075   |
| H | -0.4125602861 | -0.4215145401 | 7.4546921771  |

H -0.8079989427 -0.0816199912 -1.6614230273  
H 3.4007782527 0.2246206919 -0.5410743945  
H 3.343058377 0.1264223757 1.9325598872  
H -0.9630485883 -0.2301763217 1.8753291844

ωB97X Caffeic Acid (Radical) -0.004 a.u.

C 1.2513058688 0.0539618543 -0.763350192  
C 0.0006793716 -0.0794246434 -0.0072260218  
C -0.0187653732 -0.134039485 1.3592760354  
C 1.1900548543 -0.0599310431 2.0718487649  
C 2.4219021181 0.0718460754 1.3591561407  
C 2.468249507 0.1269797787 0.0050729593  
O -1.1047474552 -0.1425685631 -0.7465554765  
C 1.2562543516 -0.1098807095 3.5165929797  
C 0.2275727944 -0.2428120978 4.3636153192  
C 0.494428214 -0.2724854976 5.8240511746  
O -0.6382925891 -0.4066118056 6.525580225  
O 1.183412056 0.0951687349 -2.0001457677  
O 1.5828899062 -0.1876118436 6.3232203014  
H 2.2430582985 -0.0311760951 3.9643003433  
H -0.8041693448 -0.3324932494 4.0485191735  
H -0.4065256864 -0.4178894286 7.4630871499  
H -0.7959006089 -0.0809228896 -1.6668772431  
H 3.400532919 0.2271065558 -0.5356302503  
H 3.3372144351 0.1275245689 1.9368933708  
H -0.967501637 -0.2322212166 1.8703440137

ωB97X Caffeic Acid (Radical) -0.006 a.u.

C 1.2523807784 0.055569777 -0.7632632049  
C 0.0015104599 -0.0806865321 -0.0102207879  
C -0.0230317751 -0.137051786 1.3550275346  
C 1.1842101092 -0.0618654858 2.0730324092  
C 2.4170438087 0.0727244013 1.3617575094  
C 2.4660079847 0.1297043653 0.0076841286  
O -1.101976243 -0.1449107635 -0.7571403776  
C 1.2503336341 -0.1132999237 3.5161491508  
C 0.2221105387 -0.2418758292 4.3653019761  
C 0.4986940007 -0.2735885084 5.8278012295  
O -0.6286477819 -0.3993629765 6.5337483626  
O 1.1867128075 0.0967875092 -2.0029230745  
O 1.5943455458 -0.195694765 6.3096634276  
H 2.2370943274 -0.0393156224 3.9648501113  
H -0.8116381554 -0.3256726067 4.0543800886  
H -0.3990221501 -0.4122094664 7.4725843002  
H -0.782845831 -0.0804409206 -1.6734860229  
H 3.4002756863 0.2322955027 -0.5293347157

H 3.330681771 0.1292692865 1.9419957475  
H -0.9725875157 -0.2378566558 1.8641652075

ωB97X Caffeic Acid (Radical) -0.008 a.u.

C 1.2539132441 0.0556474811 -0.7633652423  
C 0.0021999539 -0.0809775294 -0.0136873591  
C -0.0281938347 -0.1376312913 1.350192114  
C 1.1774676422 -0.0623222492 2.0744654186  
C 2.4117038242 0.0732717418 1.3646969306  
C 2.4638904076 0.1305137995 0.0105511366  
O -1.0990618122 -0.145481259 -0.7688366452  
C 1.2434088318 -0.1144279801 3.515270981  
C 0.2161247652 -0.2422067225 4.3675467317  
C 0.5033381795 -0.2747328829 5.8317808208  
O -0.6176825774 -0.3955824443 6.5429503919  
O 1.1911297777 0.0962921925 -2.006084919  
O 1.6061006918 -0.200538199 6.2954520355  
H 2.2298457067 -0.0419568766 3.9651021402  
H -0.8193955667 -0.3242595367 4.0612301862  
H -0.3894659284 -0.4091099476 7.4829878596  
H -0.7687291149 -0.0796050375 -1.6808641203  
H 3.4004934953 0.2341089544 -0.5224495074  
H 3.3235169474 0.1304206621 1.9477033806  
H -0.9789526329 -0.2389038755 1.8571306659

ωB97X Gallic Acid (Radical) -0.010 a.u.

C -0.9462230124 -1.2063106501 0.0031451048  
C -1.7489350794 0.0020472166 0.0014483604  
C -1.0196090074 1.2674076773 -0.0033639905  
C 0.3510981568 1.3291690291 -0.0064088855  
C 1.059566159 0.1265456965 -0.0047035228  
C 0.4167070471 -1.1243934157 0.0000778396  
O -2.9937759512 0.0282842159 0.0039232872  
O -1.7963293773 2.354209276 -0.0046323854  
C 2.5625232359 0.0848644117 -0.0078725772  
O 3.1122318322 1.2965017658 -0.0122157125  
O -1.6325301268 -2.3662211273 0.0077802518  
O 3.1713611638 -0.9462195064 -0.006480265  
H 1.0430993055 -2.0102195686 0.001195574  
H 0.8694537054 2.2778464478 -0.0100218082  
H -1.0060272704 -3.0949565669 0.0089304199  
H -2.7028214093 2.0046627107 -0.0017372676  
H 4.0753026286 1.1999053873 -0.013769423

ωB97X Gallic Acid (Radical) -0.002 a.u.

C -0.9449760406 -1.2158668447 0.0031871678

|   |               |               |               |
|---|---------------|---------------|---------------|
| C | -1.7475415694 | -0.001819613  | 0.001595984   |
| C | -1.0180753719 | 1.2650052309  | -0.0033188508 |
| C | 0.3547584248  | 1.3192447785  | -0.0063626527 |
| C | 1.0610374703  | 0.1158176315  | -0.0045849919 |
| C | 0.4207027145  | -1.1363121016 | 0.0001628303  |
| O | -2.983215995  | 0.0216079626  | 0.0041112638  |
| O | -1.7780057606 | 2.3545482366  | -0.0046468891 |
| C | 2.5528428956  | 0.0928442422  | -0.0076475128 |
| O | 3.0990230192  | 1.3157994577  | -0.0126053501 |
| O | -1.6400156611 | -2.3618573058 | 0.0076669603  |
| O | 3.2053252988  | -0.9159652233 | -0.0059238641 |
| H | 1.0392160887  | -2.0266209831 | 0.001277469   |
| H | 0.86924715    | 2.2693451025  | -0.0100502202 |
| H | -1.0358922916 | -3.1083573111 | 0.0085086109  |
| H | -2.6963207646 | 2.0342030354  | -0.0019011979 |
| H | 4.0569823928  | 1.2015067048  | -0.0141737565 |

$\omega$ B97X Gallic Acid (Radical) -0.004 a.u.

|   |               |               |               |
|---|---------------|---------------|---------------|
| C | -0.9453275777 | -1.2134162834 | 0.0031720277  |
| C | -1.7477854541 | -0.0008191195 | 0.0015528769  |
| C | -1.0184114851 | 1.2655179799  | -0.0033269919 |
| C | 0.3539116924  | 1.3215853312  | -0.0063679654 |
| C | 1.0604220883  | 0.1183999242  | -0.0046086063 |
| C | 0.4196917812  | -1.1332947686 | 0.0001398619  |
| O | -2.9856859103 | 0.0233602719  | 0.0040555694  |
| O | -1.7823487322 | 2.3544890369  | -0.0046376062 |
| C | 2.5551070179  | 0.0907803647  | -0.0076816723 |
| O | 3.101981351   | 1.3108981353  | -0.0125297708 |
| O | -1.6380287098 | -2.362975248  | 0.0076871911  |
| O | 3.1966715907  | -0.9236436094 | -0.0060328525 |
| H | 1.0401182843  | -2.0224840406 | 0.00125454    |
| H | 0.8693768467  | 2.2712962316  | -0.0100306675 |
| H | -1.0280134566 | -3.1048735016 | 0.0086112424  |
| H | -2.697796873  | 2.0269664648  | -0.0018593971 |
| H | 4.0612095464  | 1.2013358305  | -0.0141027794 |

$\omega$ B97X Gallic Acid (Radical) -0.006 a.u.

|   |               |               |               |
|---|---------------|---------------|---------------|
| C | -0.9456630435 | -1.2110270048 | 0.0031636173  |
| C | -1.7480877107 | 0.0001541737  | 0.0015270572  |
| C | -1.0187494975 | 1.2660715823  | -0.0033410137 |
| C | 0.3530490255  | 1.3239727519  | -0.0063959425 |
| C | 1.0600032963  | 0.1209860792  | -0.0046568475 |
| C | 0.4186823285  | -1.1303586304 | 0.0001080252  |
| O | -2.9882742401 | 0.0250005613  | 0.0040197401  |
| O | -1.7867093989 | 2.3544612624  | -0.0046330165 |
| C | 2.5573963026  | 0.0888147526  | -0.007769092  |

|   |               |               |               |
|---|---------------|---------------|---------------|
| O | 3.1050494051  | 1.3062109196  | -0.012427646  |
| O | -1.6361485211 | -2.3640774197 | 0.0077228376  |
| O | 3.1882308871  | -0.9311168371 | -0.0061427104 |
| H | 1.0409573782  | -2.0184920978 | 0.0012181967  |
| H | 0.8695037946  | 2.2733054839  | -0.0100486559 |
| H | -1.0204648728 | -3.101501665  | 0.0087173508  |
| H | -2.6992196218 | 2.0196813894  | -0.0018041074 |
| H | 4.0655364886  | 1.2010376983  | -0.013962793  |

ωB97X Gallic Acid (Radical) -0.008 a.u.

|   |               |               |               |
|---|---------------|---------------|---------------|
| C | -0.9459614973 | -1.2086693403 | 0.0031540505  |
| C | -1.7484842853 | 0.0011042476  | 0.0014884652  |
| C | -1.0191447585 | 1.2666947006  | -0.0033526626 |
| C | 0.3521153116  | 1.3264758351  | -0.0064049227 |
| C | 1.0597256241  | 0.1236799814  | -0.0046832762 |
| C | 0.4176845656  | -1.1274101349 | 0.0000902783  |
| O | -2.990967442  | 0.0266526448  | 0.0039727368  |
| O | -1.7913670137 | 2.3543629359  | -0.0046317701 |
| C | 2.5599108326  | 0.086839157   | -0.0078237598 |
| O | 3.1084622678  | 1.3014099348  | -0.0123228072 |
| O | -1.6343255971 | -2.3651612236 | 0.0077520588  |
| O | 3.1798538074  | -0.9386287425 | -0.0063023336 |
| H | 1.0418995237  | -2.0144529774 | 0.0012033403  |
| H | 0.8695321186  | 2.2754646513  | -0.0100384056 |
| H | -1.0131576834 | -3.0982061274 | 0.0088242937  |
| H | -2.7009221564 | 2.012316293   | -0.0017680477 |
| H | 4.0702383824  | 1.2006511648  | -0.0138622381 |

ωB97X Caffeic Acid (Neutral) zero field

|   |               |               |               |
|---|---------------|---------------|---------------|
| C | 1.2631937249  | 0.0505461825  | -0.7114611651 |
| C | 0.0472408424  | -0.0717550196 | -0.0289289616 |
| C | 0.0402577749  | -0.1223261269 | 1.3472024186  |
| C | 1.2356221363  | -0.0525586919 | 2.0699005925  |
| C | 2.4341225618  | 0.0700840467  | 1.3756436974  |
| C | 2.45013268    | 0.1209949015  | -0.0118929155 |
| O | -1.1184369271 | -0.1394571803 | -0.7147553866 |
| C | 1.27369536    | -0.1030304816 | 3.5328346337  |
| C | 0.2428379677  | -0.2444893277 | 4.3643987728  |
| C | 0.4784392361  | -0.2717371458 | 5.8192867938  |
| O | -0.6721356275 | -0.4226258356 | 6.5062892713  |
| O | 1.1647917528  | 0.0927481932  | -2.0720378851 |
| O | 1.5441582834  | -0.1751782616 | 6.3715218693  |
| H | 2.2570613123  | -0.0148069334 | 3.987751418   |
| H | -0.7826167939 | -0.3448441978 | 4.0331928244  |
| H | -0.4362655763 | -0.4307648836 | 7.4410309802  |
| H | 2.0318428259  | 0.1757073656  | -2.4707582349 |

|   |              |               |               |
|---|--------------|---------------|---------------|
| H | -0.928026281 | -0.0898980231 | -1.6560262617 |
| H | 3.388699391  | 0.2166945205  | -0.5473952708 |
| H | 3.3669924782 | 0.1261886708  | 1.9234472834  |
| H | -0.916496122 | -0.2158197718 | 1.845339526   |

ωB97X Caffeic Acid (Neutral) 0.010 a.u.

|   |               |               |               |
|---|---------------|---------------|---------------|
| C | 1.2716027303  | 0.052390235   | -0.7118350951 |
| C | 0.0492145171  | -0.0704356498 | -0.0160508929 |
| C | 0.0521835988  | -0.1200363127 | 1.3564702556  |
| C | 1.2565263043  | -0.0482445789 | 2.0764437119  |
| C | 2.4537139457  | 0.0748557016  | 1.3721445963  |
| C | 2.4650592004  | 0.1242638223  | -0.0143143238 |
| O | -1.1120255843 | -0.1387594814 | -0.6859021765 |
| C | 1.2970668969  | -0.0995835124 | 3.5224454815  |
| C | 0.2582352369  | -0.2361989974 | 4.3677563627  |
| C | 0.4617473733  | -0.2714482162 | 5.802562861   |
| O | -0.7139652439 | -0.4278199549 | 6.4831219421  |
| O | 1.1438085525  | 0.0901373195  | -2.0455427778 |
| O | 1.4979844826  | -0.1827609676 | 6.4295724292  |
| H | 2.2839211292  | -0.0187514688 | 3.9730950214  |
| H | -0.7622324045 | -0.3305924593 | 4.0223063697  |
| H | -0.4535800316 | -0.4425206955 | 7.4085510721  |
| H | 1.9810598545  | 0.1637690259  | -2.5114963623 |
| H | -0.9507475366 | -0.0986076767 | -1.6361880002 |
| H | 3.3984875048  | 0.218661704   | -0.5567540057 |
| H | 3.3912419209  | 0.1312865674  | 1.9133647028  |
| H | -0.9041914471 | -0.2159324043 | 1.8548328281  |

ωB97X Caffeic Acid (Neutral) 0.002 a.u.

|   |               |               |               |
|---|---------------|---------------|---------------|
| C | 1.2645309028  | 0.0509552521  | -0.7111259008 |
| C | 0.0481152051  | -0.0709041311 | -0.0251759328 |
| C | 0.0441724883  | -0.1209816065 | 1.350296501   |
| C | 1.2416765456  | -0.0510208072 | 2.0709834735  |
| C | 2.4391162903  | 0.0712234413  | 1.37463477    |
| C | 2.4529642287  | 0.1215189971  | -0.0131374386 |
| O | -1.1174653691 | -0.1385849752 | -0.7064907208 |
| C | 1.2799981375  | -0.1016963053 | 3.5317114639  |
| C | 0.247178449   | -0.2429815486 | 4.3638864176  |
| C | 0.4741919494  | -0.2718124746 | 5.8157566115  |
| O | -0.6821374992 | -0.4253842067 | 6.4990177999  |
| O | 1.158638523   | 0.0919982475  | -2.0665091826 |
| O | 1.5331588094  | -0.1754918902 | 6.3841545976  |
| H | 2.2637519758  | -0.0142349267 | 3.9861872929  |
| H | -0.7767705871 | -0.342852594  | 4.0285428035  |
| H | -0.4436775588 | -0.4345732914 | 7.432477604   |
| H | 2.0198793406  | 0.1708834124  | -2.4794725788 |



H -0.9335174129 -0.0917639304 -1.649762289  
H 3.3901330435 0.2166130249 -0.5506472186  
H 3.3734145023 0.1272738468 1.9202485672  
H -0.9122409642 -0.2145115343 1.8490073593

ωB97X Caffeic Acid (Neutral) 0.004 a.u.

C 1.2660437161 0.0513152137 -0.7109880757  
C 0.0487959783 -0.0704617351 -0.0220259888  
C 0.0473510955 -0.120239221 1.3527732324  
C 1.2467989096 -0.0499306691 2.0721442132  
C 2.4435481466 0.0722389453 1.3738158397  
C 2.4558377836 0.1221129131 -0.014008469  
O -1.1162947972 -0.13824341 -0.6994861094  
C 1.2854488908 -0.1008203314 3.5301502331  
C 0.2508717649 -0.2413783386 4.3639292129  
C 0.4704356987 -0.2717958459 5.8123386447  
O -0.6912575473 -0.4270209276 6.4930312283  
O 1.1534430759 0.0913743791 -2.0611251439  
O 1.5230726787 -0.1765574236 6.3961862071  
H 2.2697554813 -0.0146076033 3.9839941506  
H -0.7718531624 -0.3402668488 4.025145697  
H -0.4491286705 -0.437373448 7.4249590004  
H 2.0087452228 0.1677914583 -2.4878677353  
H -0.9384546344 -0.0935317588 -1.6446335096  
H 3.3917941629 0.2168270158 -0.5531993103  
H 3.379020216 0.1283296355 1.9176823906  
H -0.90886301 -0.2140899995 1.8517682922

ωB97X Caffeic Acid (Neutral) 0.006 a.u.

C 1.2677373166 0.0516686901 -0.7110576502  
C 0.0492389241 -0.0702805688 -0.0194797129  
C 0.049749558 -0.1199015732 1.3546196551  
C 1.2509627719 -0.0491520274 2.0734103886  
C 2.4474245411 0.0731730213 1.3731657588  
C 2.4587856465 0.1227775245 -0.0144925146  
O -1.1149614281 -0.1382245281 -0.6937466456  
C 1.2900476552 -0.1002465903 3.5281113004  
C 0.2539135668 -0.2397188939 4.3645576461  
C 0.467150659 -0.2717225844 5.8090115144  
O -0.6995139089 -0.4278517685 6.4883877307  
O 1.1492416247 0.0908797758 -2.0558602569  
O 1.5138993388 -0.1781906982 6.4076669622  
H 2.2750540555 -0.0156032785 3.9811305932  
H -0.7678486735 -0.3373078795 4.0230155974  
H -0.4525529312 -0.4394905496 7.4184951929  
H 1.9985448139 0.1657549841 -2.4959921052

H -0.9428957279 -0.0952437303 -1.6406714473  
H 3.3937217387 0.217277945 -0.5550430305  
H 3.3838173953 0.1293567402 1.9157317433  
H -0.9064059366 -0.2142820103 1.8536232802

ωB97X Caffeic Acid (Neutral) 0.008 a.u.

C 1.2695985679 0.0521203083 -0.711319183  
C 0.0494084724 -0.0704286548 -0.0175050808  
C 0.0513694696 -0.1201353103 1.3558231435  
C 1.2541935874 -0.0487815822 2.074832021  
C 2.4507789236 0.0740443155 1.3726570109  
C 2.4618251181 0.1236551972 -0.0145680448  
O -1.1134951306 -0.1386690325 -0.6892882697  
C 1.2938758162 -0.1000752947 3.525545264  
C 0.2562953894 -0.2377739158 4.365819099  
C 0.4643014266 -0.27158267 5.8057361401  
O -0.7070504041 -0.4276391161 6.4851144759  
O 1.1459995148 0.0906423196 -2.050661751  
O 1.5056550359 -0.1807123187 6.4186662627  
H 2.2797652988 -0.0176864695 3.9775178866  
H -0.7647810518 -0.3333415414 4.022119546  
H -0.4539579866 -0.4408743131 7.4130509303  
H 1.989281212 0.1648704696 -2.5038091495  
H -0.9468997587 -0.097110484 -1.6379156895  
H 3.3959221998 0.2182081928 -0.5561683556  
H 3.387852941 0.1303874182 1.9143437417  
H -0.9048276417 -0.2154455182 1.8545940019

ωB97X Gallic Acid (Neutral) zero field

C -0.9511323665 -1.1712255722 0.0023158196  
C -1.6878417465 0.0070401676 0.0005623067  
C -1.0395076232 1.2362664538 -0.0038069722  
C 0.3447358173 1.2868924137 -0.0064087783  
C 1.0693652762 0.1021185602 -0.0045765563  
C 0.4276431056 -1.1328120333 -0.0001969156  
O -3.0462273387 0.0081035743 0.0029464931  
O -1.7586912324 2.3830043444 -0.0055332118  
C 2.5538630439 0.0940737187 -0.0072040603  
O 3.0947760129 1.32522756 -0.0118141623  
O -1.6972168581 -2.3162097589 0.0065253195  
O 3.2332414263 -0.8997427455 -0.0055887311  
H 1.0200433967 -2.0402446023 0.0011078389  
H 0.8401331971 2.2474325514 -0.0098802395  
H -1.1264824606 -3.0856803086 0.007634476  
H -3.3610063609 -0.9006647487 0.0057475426  
H -2.6950621017 2.1632320285 -0.0033686854

H 4.0509278124 1.2044133968 -0.0131674837

ωB97X Gallic Acid (Neutral) 0.010 a.u.

C -0.9485483823 -1.1880047293 0.0024630975  
C -1.6888496689 -0.0050312994 0.000723095  
C -1.0353181948 1.2279922532 -0.003648204  
C 0.3476984008 1.2738778074 -0.0062417024  
C 1.0791258991 0.0882193735 -0.0043790718  
C 0.4320077039 -1.1490547307 0.0000113886  
O -3.027815396 0.019277355 0.0029872588  
O -1.7393013272 2.3729823961 -0.0054029225  
C 2.5462655871 0.1053215769 -0.0070632065  
O 3.0822073553 1.3531145223 -0.0122615745  
O -1.6994964548 -2.3193607901 0.0065834357  
O 3.2830494194 -0.8578482039 -0.0052757509  
H 1.0153729431 -2.0620424864 0.0013228718  
H 0.8348528723 2.2383077238 -0.0098077814  
H -1.155706286 -3.107263503 0.0071625369  
H -3.4018623848 -0.8689006744 0.0054762921  
H -2.6846593636 2.1807879746 -0.0036241965  
H 4.0325382772 1.2088504344 -0.0137315656

ωB97X Gallic Acid (Neutral) 0.002 a.u.

C -0.9507479194 -1.1744238507 0.0023478249  
C -1.6878907049 0.0046563554 0.0005984852  
C -1.0386027845 1.2344233143 -0.0037711988  
C 0.3454487068 1.2840754892 -0.0063749889  
C 1.070943018 0.099153356 -0.0045410231  
C 0.4284704474 -1.1361162668 -0.0001576515  
O -3.0424864708 0.0105056433 0.0029580016  
O -1.7543949234 2.3809666812 -0.0055030022  
C 2.552216122 0.0963507689 -0.007190704  
O 3.0917772785 1.3308042328 -0.0119013543  
O -1.6976825561 -2.3167533821 0.0065382855  
O 3.2431004408 -0.8912993758 -0.0055235973  
H 1.0188181303 -2.0447622608 0.0011477309  
H 0.8392516908 2.245327425 -0.0098663308  
H -1.1320639616 -3.0897850808 0.0075478182  
H -3.368768406 -0.8945106641 0.0056824112  
H -2.6926161108 2.166856756 -0.0034260564  
H 4.0467890028 1.205755859 -0.0132706501

ωB97X Gallic Acid (Neutral) 0.004 a.u.

C -0.9503174299 -1.177730551 0.0023779765  
C -1.6880286975 0.0022211763 0.0006321091  
C -1.0377307456 1.2326134077 -0.003738192

|   |               |               |               |
|---|---------------|---------------|---------------|
| C | 0.3461104493  | 1.2813340226  | -0.0063430256 |
| C | 1.0726945913  | 0.0962623898  | -0.0045057537 |
| C | 0.4293173281  | -1.1394026457 | -0.000118667  |
| O | -3.0388211139 | 0.0129893831  | 0.0029674884  |
| O | -1.7503040499 | 2.3788913827  | -0.0054751073 |
| C | 2.5506743374  | 0.0986146931  | -0.0071742641 |
| O | 3.0890187732  | 1.3363588614  | -0.0119872348 |
| O | -1.6980367939 | -2.3174580081 | 0.0065504891  |
| O | 3.2530403604  | -0.8828677577 | -0.0054586734 |
| H | 1.0177159444  | -2.0492204586 | 0.0011872484  |
| H | 0.8382794442  | 2.2433346567  | -0.0098538259 |
| H | -1.1375392728 | -3.094021115  | 0.0074601006  |
| H | -3.3770584158 | -0.8879772059 | 0.0056250592  |
| H | -2.6903460594 | 2.1703503669  | -0.0034782108 |
| H | 4.0428923503  | 1.2069324017  | -0.0133735166 |

ωB97X Gallic Acid (Neutral) 0.006 a.u.

|   |               |               |               |
|---|---------------|---------------|---------------|
| C | -0.9498250275 | -1.1811291309 | 0.0024068321  |
| C | -1.6882438136 | -0.0002427914 | 0.0006645429  |
| C | -1.0368871708 | 1.2308869539  | -0.0037080053 |
| C | 0.3467171269  | 1.2786959324  | -0.0063140146 |
| C | 1.0746358823  | 0.0934600167  | -0.0044720051 |
| C | 0.4301906383  | -1.1426591793 | -0.0000805583 |
| O | -3.035181115  | 0.0154238262  | 0.0029782542  |
| O | -1.7464216838 | 2.3768135079  | -0.0054497408 |
| C | 2.5492014642  | 0.1008619568  | -0.0071556272 |
| O | 3.0864979469  | 1.3419136503  | -0.0120714568 |
| O | -1.6983623495 | -2.3182332509 | 0.0065634328  |
| O | 3.263035605   | -0.8744669025 | -0.0053921669 |
| H | 1.0167615615  | -2.0535997803 | 0.0012257189  |
| H | 0.8372156664  | 2.2414825821  | -0.0098449437 |
| H | -1.1431050859 | -3.0983806295 | 0.0073674933  |
| H | -3.3856330782 | -0.8812647065 | 0.0055768115  |
| H | -2.6882589361 | 2.1737674311  | -0.0035268596 |
| H | 4.0392233688  | 1.2078955139  | -0.0134737073 |

ωB97X Gallic Acid (Neutral) 0.008 a.u.

|   |               |               |               |
|---|---------------|---------------|---------------|
| C | -0.9492402221 | -1.1845466754 | 0.0024346582  |
| C | -1.6885110856 | -0.0026610033 | 0.0006953652  |
| C | -1.0360820921 | 1.2293407874  | -0.0036795604 |
| C | 0.347251464   | 1.2762121061  | -0.0062845915 |
| C | 1.0767703851  | 0.0907803318  | -0.0044354402 |
| C | 0.4310903472  | -1.1458727584 | -0.0000407517 |
| O | -3.0315149801 | 0.0175231573  | 0.0029882324  |
| O | -1.7427553295 | 2.3748384925  | -0.0054265346 |
| C | 2.5477394172  | 0.1030945977  | -0.0071275856 |

O 3.0842215182 1.3474840373 -0.0121571126  
O -1.698852793 -2.318866207 0.0065759184  
O 3.2730271199 -0.8661309117 -0.0053282709  
H 1.0159879545 -2.0578669717 0.0012662405  
H 0.8360774587 2.239807756 -0.0098352714  
H -1.1491575815 -3.1027911411 0.0072702862  
H -3.3938956618 -0.8749010518 0.0055328446  
H -2.6863647414 2.1772355937 -0.0035738829  
H 4.0357698221 1.2085448605 -0.0135805437

$\omega$ B97X Caffeic Acid (Radical) Zero field

C 1.2498795118 0.0531861971 -0.7636557186  
C -0.0010113343 -0.0786917578 -0.002626166  
C -0.0119374497 -0.1320395521 1.3658319447  
C 1.1996635422 -0.0584496041 2.0701429829  
C 2.4302819437 0.0710138739 1.3550829689  
C 2.4725388612 0.1249278642 0.0011966255  
O -1.1088082783 -0.1411507234 -0.7293194055  
C 1.2662892851 -0.1069799834 3.515837201  
C 0.2364016063 -0.2421843029 4.361948796  
C 0.487249322 -0.2706194423 5.8171882106  
O -0.6554036828 -0.4144602751 6.5127557438  
O 1.1782493003 0.0952102172 -1.9948951481  
O 1.5627323389 -0.1791266974 6.3482288904  
H 2.2540755117 -0.0250394954 3.9608674146  
H -0.7925272556 -0.3358964603 4.0403558054  
H -0.4169638272 -0.4244290432 7.4471581541  
H -0.8191489582 -0.0824642035 -1.6568294937  
H 3.4012226322 0.2227416861 -0.545819462  
H 3.3482885317 0.125620336 1.928863972  
H -0.959419601 -0.2286496335 1.879459684

$\omega$ B97X Caffeic Acid (Radical) 0.010 a.u.

C 1.2526453355 0.0560176079 -0.7678228374  
C -0.0067483506 -0.0802469912 0.00146337  
C -0.0056183187 -0.1340950247 1.3727202579  
C 1.2111001977 -0.0589167786 2.0699111658  
C 2.4457579991 0.071300391 1.3484631524  
C 2.4861801799 0.1261877205 -0.0020016763  
O -1.1136981485 -0.1435138205 -0.7027897363  
C 1.280369531 -0.1061586903 3.504824785  
C 0.2477482344 -0.2381118484 4.366567591  
C 0.4746862387 -0.267767443 5.8011913086  
O -0.6875906323 -0.4171021857 6.5002473396  
O 1.1794980529 0.1021290645 -1.9847468202  
O 1.5249721127 -0.1781940218 6.4007900762

H 2.2725911653 -0.0264622924 3.9416378366  
H -0.7780212248 -0.3306022976 4.0370128173  
H -0.4156331338 -0.4278440787 7.4226201163  
H -0.8695755492 -0.088130845 -1.6459677948  
H 3.4089167052 0.222884428 -0.5594037352  
H 3.3663458258 0.1243309666 1.9192490067  
H -0.9522742203 -0.2331848607 1.8878067767

ωB97X Caffeic Acid (Radical) 0.002 a.u.

C 1.2495878093 0.0535697373 -0.7639572325  
C -0.0019727009 -0.0788183086 -0.0009016298  
C -0.0093987706 -0.1321187816 1.3682747494  
C 1.2034785203 -0.0582877104 2.0696481233  
C 2.433950623 0.0709507001 1.3534690876  
C 2.4747769075 0.1248422483 -0.0001586704  
O -1.11036151 -0.141296429 -0.7222363038  
C 1.2704138753 -0.1064950381 3.5146656106  
C 0.2398830994 -0.2414174994 4.3618155499  
C 0.4841993468 -0.2698987951 5.8138904133  
O -0.6630104539 -0.4161650821 6.5079315195  
O 1.1767126044 0.0958786862 -1.9924653855  
O 1.5538279008 -0.1775257727 6.3597251426  
H 2.2589161007 -0.0244674239 3.9582464323  
H -0.7880296594 -0.3353737478 4.0376618552  
H -0.419961676 -0.4260034118 7.4405016705  
H -0.8298088425 -0.0832615027 -1.6530294994  
H 3.4018834188 0.2221325679 -0.5498777013  
H 3.3529792267 0.1252086927 1.9258084018  
H -0.9564138199 -0.2289341292 1.8827608667

ωB97X Caffeic Acid (Radical) 0.004 a.u.

C 1.2497459691 0.0535366184 -0.7645273059  
C -0.0030259209 -0.078758432 0.0003173189  
C -0.0074842118 -0.1317034614 1.3701341908  
C 1.2065863531 -0.0578353553 2.0693504742  
C 2.437349361 0.0709139048 1.3520802837  
C 2.4772636706 0.1244319605 -0.0011796012  
O -1.1117428314 -0.1410804776 -0.7159598283  
C 1.2737976944 -0.1056002005 3.5130207379  
C 0.2427771428 -0.2409519329 4.3621514858  
C 0.4814274209 -0.2692650513 5.8106857152  
O -0.6698544119 -0.4182628508 6.5042156864  
O 1.176317626 0.0961679361 -1.9903115968  
O 1.5455036946 -0.1757438232 6.3706607651  
H 2.2630014813 -0.0229362175 3.9551498689  
H -0.7841941767 -0.3359686556 4.0358665216

H -0.4213093117 -0.4278571374 7.4347317953  
H -0.8404637905 -0.0841091978 -1.6499696019  
H 3.4030244261 0.2209904859 -0.5532639849  
H 3.3571583781 0.124830647 1.9233922005  
H -0.9542265631 -0.2282797593 1.8852278745

$\omega$ B97X Caffeic Acid (Radical) 0.006 a.u.

C 1.2503185616 0.0539749468 -0.7653247767  
C -0.0041138717 -0.0790179211 0.0011428395  
C -0.0061109884 -0.1320045253 1.3714863946  
C 1.2090128756 -0.0578505081 2.0693088011  
C 2.4405052702 0.0710145025 1.3508571541  
C 2.4799792329 0.1246393241 -0.0017957589  
O -1.1128618426 -0.1414861826 -0.7104568346  
C 1.2766314092 -0.1053861913 3.5108301018  
C 0.2450486512 -0.240152501 4.3629611014  
C 0.4789063052 -0.2687161848 5.807449443  
O -0.6762561308 -0.4188998456 6.5015557479  
O 1.1767820257 0.0973903485 -1.9883042662  
O 1.5379067304 -0.1755378626 6.3810550923  
H 2.266687936 -0.0231403632 3.951409181  
H -0.7812760235 -0.3350018007 4.035071501  
H -0.4211579093 -0.4286241386 7.4297341825  
H -0.8510575968 -0.0853123127 -1.6476538982  
H 3.4045428204 0.2209586062 -0.5559591278  
H 3.3608614669 0.1246650036 1.9215240502  
H -0.9526969223 -0.228993394 1.8868820719

$\omega$ B97X Caffeic Acid (Radical) 0.008 a.u.

C 1.2512711305 0.0553565065 -0.7663700176  
C -0.0052652945 -0.0798964085 0.0014784706  
C -0.0053486204 -0.1337245229 1.3722661269  
C 1.2106038376 -0.0588238012 2.0694650614  
C 2.4433313825 0.0711953582 1.3497232951  
C 2.4828752859 0.125925302 -0.001994811  
O -1.1135154603 -0.1430085376 -0.7060367789  
C 1.2788595424 -0.1064041502 3.5080804119  
C 0.2466221422 -0.2387819435 4.3644129972  
C 0.4766918626 -0.2682148579 5.8042797284  
O -0.6822688988 -0.4170061899 6.5002503332  
O 1.1778643387 0.1005285955 -1.9864106446  
O 1.5312427419 -0.1777642251 6.3909814576  
H 2.2700279745 -0.0262960542 3.9468699529  
H -0.7794630979 -0.3313062725 4.0355296482  
H -0.4193761551 -0.4274738673 7.4257382081  
H -0.8609597726 -0.0869007094 -1.6462855143

|   |               |               |               |
|---|---------------|---------------|---------------|
| H | 3.4063618443  | 0.2228776669  | -0.5579601012 |
| H | 3.3639631745  | 0.1246187008  | 1.9201742454  |
| H | -0.9518659582 | -0.2323815897 | 1.8875809307  |

ωB97X Gallic Acid (Radical) Zero field

|   |               |               |               |
|---|---------------|---------------|---------------|
| C | -0.9445798581 | -1.2184108144 | 0.0032033196  |
| C | -1.7474130476 | -0.0028890278 | 0.0016401002  |
| C | -1.0177831875 | 1.2645214039  | -0.0033124336 |
| C | 0.3555420953  | 1.3169288219  | -0.0063585863 |
| C | 1.0618337042  | 0.1132483184  | -0.0045619588 |
| C | 0.4217242583  | -1.1394130355 | 0.0001872154  |
| O | -2.9808737659 | 0.0196625611  | 0.0041711912  |
| O | -1.7737046737 | 2.3546540637  | -0.0046597964 |
| C | 2.5507053185  | 0.0949601693  | -0.0076168223 |
| O | 3.0962338731  | 1.3207942121  | -0.0126738513 |
| O | -1.6420660544 | -2.3607603976 | 0.0076490076  |
| O | 3.2141661434  | -0.9081725578 | -0.005826805  |
| H | 1.0382965672  | -2.0308795225 | 0.0013019259  |
| H | 0.8690423263  | 2.2674445423  | -0.010072305  |
| H | -1.044050721  | -3.1119739212 | 0.0084074202  |
| H | -2.6949155467 | 2.0417353391  | -0.0019439319 |
| H | 4.0529345684  | 1.2016728449  | -0.0142386893 |

ωB97X Gallic Acid (Radical) 0.010 a.u.

|   |               |               |               |
|---|---------------|---------------|---------------|
| C | -0.9412794286 | -1.232892299  | 0.0032941767  |
| C | -1.7486044068 | -0.0092344186 | 0.0018897369  |
| C | -1.0171213833 | 1.2632513776  | -0.0033163873 |
| C | 0.3582218666  | 1.3067003449  | -0.0064347252 |
| C | 1.0686096816  | 0.1014550392  | -0.004553037  |
| C | 0.4271797768  | -1.155867016  | 0.0002739594  |
| O | -2.9709121708 | 0.0064740144  | 0.0045375369  |
| O | -1.7536065137 | 2.3560911183  | -0.0047294299 |
| C | 2.5408924916  | 0.1061776075  | -0.0076582175 |
| O | 3.0855872059  | 1.3469642009  | -0.0128924403 |
| O | -1.6528058308 | -2.3556806484 | 0.0076278149  |
| O | 3.2594950021  | -0.8688116694 | -0.005361213  |
| H | 1.0354487681  | -2.052530053  | 0.001364712   |
| H | 0.8665655732  | 2.2597180078  | -0.0103252692 |
| H | -1.0889810122 | -3.1322853367 | 0.007968688   |
| H | -2.6894202183 | 2.0833380565  | -0.0020675351 |
| H | 4.0358225985  | 1.200254674   | -0.01432337   |

ωB97X Gallic Acid (Radical) 0.002 a.u.

|   |               |               |               |
|---|---------------|---------------|---------------|
| C | -0.9441017529 | -1.2211002265 | 0.0032195674  |
| C | -1.747435797  | -0.0040778008 | 0.0016843197  |
| C | -1.0175704507 | 1.2640539133  | -0.0033076537 |



|   |               |               |               |
|---|---------------|---------------|---------------|
| C | 0.3562219708  | 1.3146150996  | -0.0063565172 |
| C | 1.0628059011  | 0.1106876231  | -0.0045398903 |
| C | 0.4227761908  | -1.1426216333 | 0.0002127274  |
| O | -2.9786712953 | 0.017348885   | 0.0042300227  |
| O | -1.7693676296 | 2.3548755478  | -0.0046741985 |
| C | 2.5486512551  | 0.0971315541  | -0.007587574  |
| O | 3.0936039502  | 1.3258942825  | -0.0127414306 |
| O | -1.6441364859 | -2.3597267158 | 0.007632567   |
| O | 3.2231602771  | -0.9002693502 | -0.0057310099 |
| H | 1.0374422692  | -2.0352431392 | 0.0013276144  |
| H | 0.8687050134  | 2.265581417   | -0.0100974555 |
| H | -1.0524626201 | -3.1157730395 | 0.0083073997  |
| H | -2.6935768493 | 2.049944251   | -0.0019818146 |
| H | 4.0490480532  | 1.2018023321  | -0.014301674  |

ωB97X Gallic Acid (Radical) 0.004 a.u.

|   |               |               |               |
|---|---------------|---------------|---------------|
| C | -0.9435907156 | -1.2241104843 | 0.0032445716  |
| C | -1.7478105134 | -0.00539441   | 0.0017699697  |
| C | -1.0174464162 | 1.2638348182  | -0.0033547194 |
| C | 0.3569248424  | 1.3122676196  | -0.0065789832 |
| C | 1.0639454251  | 0.1080232648  | -0.004814875  |
| C | 0.4239071378  | -1.1460587529 | 0.0000755698  |
| O | -2.9766607663 | 0.0141864439  | 0.0045627827  |
| O | -1.764556326  | 2.3552841737  | -0.0046716975 |
| C | 2.5467380491  | 0.0993437174  | -0.0080676236 |
| O | 3.0907480588  | 1.331337609   | -0.0125717979 |
| O | -1.6462012516 | -2.3586685816 | 0.0077645732  |
| O | 3.2321476246  | -0.8923860681 | -0.0054842375 |
| H | 1.0367648871  | -2.0398118626 | 0.0011405012  |
| H | 0.868491679   | 2.2636735663  | -0.0104311414 |
| H | -1.0615376861 | -3.1198880267 | 0.00833244    |
| H | -2.6916851689 | 2.0589907079  | -0.0018977686 |
| H | 4.0449131401  | 1.2024992654  | -0.0137225642 |

ωB97X Gallic Acid (Radical) 0.006 a.u.

|   |               |               |               |
|---|---------------|---------------|---------------|
| C | -0.9429107316 | -1.2269768219 | 0.0032430081  |
| C | -1.7479838797 | -0.0067298578 | 0.0017513567  |
| C | -1.0173913508 | 1.2634598531  | -0.0033324784 |
| C | 0.3573774395  | 1.3101436174  | -0.0064929946 |
| C | 1.0652540782  | 0.105625696   | -0.0046960115 |
| C | 0.4250286512  | -1.1493572524 | 0.0001532778  |
| O | -2.9746224671 | 0.01149832    | 0.0045423155  |
| O | -1.760548534  | 2.355500675   | -0.0046796058 |
| C | 2.5446890569  | 0.1016298345  | -0.0078558728 |
| O | 3.0887187187  | 1.3365196496  | -0.0127156195 |
| O | -1.6482974364 | -2.3575944013 | 0.0076976364  |

|   |               |               |               |
|---|---------------|---------------|---------------|
| O | 3.2413076865  | -0.8843401072 | -0.0054542166 |
| H | 1.0361752475  | -2.0441691221 | 0.0012444201  |
| H | 0.867808944   | 2.2620908255  | -0.0103280064 |
| H | -1.0703668395 | -3.1238059198 | 0.0082217122  |
| H | -2.6907262438 | 2.0676737388  | -0.001984299  |
| H | 4.0415796603  | 1.2019542726  | -0.014019622  |

ωB97X Gallic Acid (Radical) 0.008 a.u.

|   |               |               |               |
|---|---------------|---------------|---------------|
| C | -0.9421362298 | -1.229799967  | 0.0032701313  |
| C | -1.7481807718 | -0.007935581  | 0.0018190385  |
| C | -1.0172329684 | 1.2632312804  | -0.0033074129 |
| C | 0.3577979818  | 1.3084070622  | -0.0063935761 |
| C | 1.0668543527  | 0.103560627   | -0.0045260971 |
| C | 0.4260816403  | -1.1525276298 | 0.0002701767  |
| O | -2.9727715727 | 0.0092397988  | 0.0044290035  |
| O | -1.7571797254 | 2.3558236577  | -0.0047107326 |
| C | 2.5427824129  | 0.1038631399  | -0.0075946157 |
| O | 3.0871645699  | 1.3416065276  | -0.0128907287 |
| O | -1.6505555734 | -2.3567292431 | 0.0076156041  |
| O | 3.250362779   | -0.8766298026 | -0.0054465689 |
| H | 1.0357541591  | -2.0482787382 | 0.0013769078  |
| H | 0.8671533934  | 2.2608965129  | -0.0102346227 |
| H | -1.0793375972 | -3.1279831755 | 0.0080494406  |
| H | -2.6902198836 | 2.0753569003  | -0.0020524983 |
| H | 4.0387550333  | 1.2010216303  | -0.0143784492 |

**Table S1:** Thermal enthalpies of all the species at 298.15 K with LC-BLYP/6-311++G(3df,2p)

| Gallic Acid (Neutral) | Along C-O bond | Perpendicular to the C-O bond | Perpendicular to the molecular plane |
|-----------------------|----------------|-------------------------------|--------------------------------------|
| 0.010                 | -645.11334     | -645.11218                    | -645.10704                           |
| 0.008                 | -645.10915     | -645.10853                    | -645.10433                           |
| 0.006                 | -645.10568     | -645.10542                    | -645.10217                           |
| 0.004                 | -645.10291     | -645.10286                    | -645.10063                           |
| 0.002                 | -645.10077     | -645.10083                    | -645.09968                           |
| 0.000                 | -645.09935     | -645.09935                    | -645.09935                           |
| -0.002                | -645.09859     | -645.09845                    | -645.09969                           |
| -0.004                | -645.09848     | -645.09806                    | -645.10065                           |
| -0.006                | -645.09901     | -645.09822                    | -645.10220                           |
| -0.008                | -645.10019     | -645.09893                    | -645.10437                           |
| -0.010                | -645.10200     | -645.10020                    | -645.10704                           |

| Gallic Acid (Radical) | Along C-O bond | Perpendicular to the C-O bond | Perpendicular to the molecular plane |
|-----------------------|----------------|-------------------------------|--------------------------------------|
| 0.010                 | -644.47568     | -644.48458                    | -644.48197                           |
| 0.008                 | -644.47442     | -644.48176                    | -644.47994                           |
| 0.006                 | -644.47386     | -644.47953                    | -644.47836                           |
| 0.004                 | -644.47401     | -644.47789                    | -644.47724                           |
| 0.002                 | -644.47484     | -644.47683                    | -644.47657                           |
| 0.000                 | -644.47635     | -644.47635                    | -644.47635                           |
| -0.002                | -644.47854     | -644.47646                    | -644.47657                           |
| -0.004                | -644.48139     | -644.47716                    | -644.47723                           |
| -0.006                | -644.48490     | -644.47845                    | -644.47834                           |
| -0.008                | -644.48908     | -644.48032                    | -644.47991                           |
| -0.010                | -644.49392     | -644.48279                    | -644.48193                           |

| Gallic Acid (Radical Cation) | Along C-O bond | Perpendicular to the C-O bond | Perpendicular to the molecular plane |
|------------------------------|----------------|-------------------------------|--------------------------------------|
| 0.010                        | -644.81955     | -644.80513                    | -644.80009                           |
| 0.008                        | -644.81314     | -644.80153                    | -644.79801                           |
| 0.006                        | -644.80742     | -644.79864                    | -644.79639                           |
| 0.004                        | -644.80237     | -644.79647                    | -644.79524                           |
| 0.002                        | -644.79801     | -644.79505                    | -644.79455                           |
| 0.000                        | -644.79433     | -644.79433                    | -644.79433                           |
| -0.002                       | -644.79133     | -644.79428                    | -644.79455                           |
| -0.004                       | -644.78902     | -644.79489                    | -644.79524                           |
| -0.006                       | -644.78741     | -644.79611                    | -644.79639                           |

|        |            |            |            |
|--------|------------|------------|------------|
| -0.008 | -644.78650 | -644.79795 | -644.79801 |
| -0.010 | -644.78629 | -644.80037 | -644.80009 |

| Gallic Acid (Anion) | Along C-O bond | Perpendicular to the C-O bond | Perpendicular to the molecular plane |
|---------------------|----------------|-------------------------------|--------------------------------------|
| 0.010               | -644.57195     | -644.58662                    | -644.59682                           |
| 0.008               | -644.57045     | -644.58323                    | -644.59474                           |
| 0.006               | -644.57012     | -644.58045                    | -644.59327                           |
| 0.004               | -644.57090     | -644.57826                    | -644.57692                           |
| 0.002               | -644.57278     | -644.57668                    | -644.57598                           |
| 0.000               | -644.57569     | -644.57569                    | -644.57569                           |
| -0.002              | -644.57959     | -644.57529                    | -644.57599                           |
| -0.004              | -644.58444     | -644.57548                    | -644.57693                           |
| -0.006              | -644.59020     | -644.57627                    | -644.59327                           |
| -0.008              | -644.59684     | -644.57766                    | -644.59475                           |
| -0.010              | -644.60432     | -644.57964                    | -644.59683                           |

| Caffeic Acid (Neutral) | Along C-O bond | Perpendicular to the C-O bond | Perpendicular to the molecular plane |
|------------------------|----------------|-------------------------------|--------------------------------------|
| 0.010                  | -647.14973     | -647.12553                    | -647.13272                           |
| 0.008                  | -647.14230     | -647.12391                    | -647.12937                           |
| 0.006                  | -647.13599     | -647.12289                    | -647.12669                           |
| 0.004                  | -647.13075     | -647.12245                    | -647.12473                           |
| 0.002                  | -647.12653     | -647.12258                    | -647.12355                           |
| 0.000                  | -647.12328     | -647.12328                    | -647.12328                           |
| -0.002                 | -647.12099     | -647.12455                    | -647.12394                           |
| -0.004                 | -647.11963     | -647.12639                    | -647.12549                           |
| -0.006                 | -647.11918     | -647.12879                    | -647.12777                           |
| -0.008                 | -647.11963     | -647.13177                    | -647.13076                           |
| -0.010                 | -647.12101     | -647.13531                    | -647.13438                           |

| Caffeic Acid (Radical) | Along C-O bond | Perpendicular to the C-O bond | Perpendicular to the molecular plane |
|------------------------|----------------|-------------------------------|--------------------------------------|
| 0.010                  | -646.51522     | -646.51638                    | -646.51427                           |
| 0.008                  | -646.51158     | -646.51356                    | -646.51208                           |
| 0.006                  | -646.50909     | -646.51131                    | -646.51036                           |
| 0.004                  | -646.50769     | -646.50965                    | -646.50912                           |
| 0.002                  | -646.50735     | -646.50856                    | -646.50834                           |
| 0.000                  | -646.50803     | -646.50803                    | -646.50803                           |
| -0.002                 | -646.50974     | -646.50808                    | -646.50834                           |

|        |            |            |            |
|--------|------------|------------|------------|
| -0.004 | -646.51248 | -646.50870 | -646.50912 |
| -0.006 | -646.51624 | -646.50988 | -646.51036 |
| -0.008 | -646.52105 | -646.51163 | -646.51208 |
| -0.010 | -646.52694 | -646.51395 | -646.51427 |

| Caffeic Acid (Radical Cation) | Along C-O bond | Perpendicular to the C-O bond | Perpendicular to the molecular plane |
|-------------------------------|----------------|-------------------------------|--------------------------------------|
| 0.010                         | -646.83191     | -646.81290                    | -646.83564                           |
| 0.008                         | -646.82878     | -646.81472                    | -646.83283                           |
| 0.006                         | -646.82669     | -646.81709                    | -646.83057                           |
| 0.004                         | -646.82577     | -646.82001                    | -646.82891                           |
| 0.002                         | -646.82601     | -646.82348                    | -646.82785                           |
| 0.000                         | -646.82749     | -646.82749                    | -646.82749                           |
| -0.002                        | -646.83031     | -646.83205                    | -646.82780                           |
| -0.004                        | -646.83460     | -646.83714                    | -646.82882                           |
| -0.006                        | -646.84044     | -646.84278                    | -646.83047                           |
| -0.008                        | -646.84788     | -646.84895                    | -646.83273                           |
| -0.010                        | -646.85691     | -646.85567                    | -646.83559                           |

| Caffeic Acid (Anion) | Along C-O bond | Perpendicular to the C-O bond | Perpendicular to the molecular plane |
|----------------------|----------------|-------------------------------|--------------------------------------|
| 0.010                | -646.65971     | -646.63725                    | -646.61821                           |
| 0.008                | -646.64621     | -646.63115                    | -646.61620                           |
| 0.006                | -646.63482     | -646.62569                    | -646.61469                           |
| 0.004                | -646.62558     | -646.62086                    | -646.61368                           |
| 0.002                | -646.61839     | -646.61667                    | -646.61315                           |
| 0.000                | -646.61312     | -646.61312                    | -646.61312                           |
| -0.002               | -646.60959     | -646.61019                    | -646.61357                           |
| -0.004               | -646.60766     | -646.60790                    | -646.61450                           |
| -0.006               | -646.60716     | -646.60624                    | -646.61592                           |
| -0.008               | -646.60801     | -646.60521                    | -646.61784                           |
| -0.010               | -646.61010     | -646.60482                    | -646.62025                           |

**Table S2:** Dipole moment (in Debye) of gallic acid and caffeic acid

|        | Along C-O bond |        | Perpendicular to C-O bond |       | Perpendicular to molecular plane |       |
|--------|----------------|--------|---------------------------|-------|----------------------------------|-------|
|        | GA             | CA     | GA                        | CA    | GA                               | CA    |
| 0.010  | 5.906          | 10.221 | 5.164                     | 3.901 | 4.191                            | 5.444 |
| 0.008  | 5.046          | 8.779  | 4.515                     | 3.583 | 3.609                            | 4.917 |
| 0.006  | 4.222          | 7.431  | 3.875                     | 3.408 | 3.062                            | 4.444 |
| 0.004  | 3.440          | 6.155  | 3.250                     | 3.386 | 2.579                            | 4.063 |
| 0.002  | 2.716          | 4.939  | 2.648                     | 3.515 | 2.223                            | 3.821 |
| 0.000  | 2.088          | 3.774  | 2.088                     | 3.774 | 2.088                            | 3.774 |
| -0.002 | 1.652          | 2.674  | 1.620                     | 4.145 | 2.228                            | 3.956 |
| -0.004 | 1.556          | 1.692  | 1.344                     | 4.593 | 2.586                            | 4.306 |
| -0.006 | 1.843          | 1.125  | 1.387                     | 5.101 | 3.070                            | 4.756 |
| -0.008 | 2.373          | 1.524  | 1.728                     | 5.651 | 3.618                            | 5.268 |
| -0.010 | 3.016          | 2.453  | 2.239                     | 6.234 | 4.200                            | 5.818 |

**Table S3:** Component of Dipole moment along C-O bond (in Debye) of gallic acid and caffeic acid

|        | Along C-O bond |         | Perpendicular to C-O bond |        | Perpendicular to molecular plane |        |
|--------|----------------|---------|---------------------------|--------|----------------------------------|--------|
|        | GA             | CA      | GA                        | CA     | GA                               | CA     |
| 0.010  | -5.653         | -10.051 | -1.501                    | -3.090 | -1.355                           | -2.688 |
| 0.008  | -4.758         | -8.607  | -1.471                    | -3.192 | -1.355                           | -2.891 |
| 0.006  | -3.886         | -7.253  | -1.443                    | -3.281 | -1.358                           | -3.100 |
| 0.004  | -3.032         | -5.967  | -1.417                    | -3.366 | -1.361                           | -3.297 |
| 0.002  | -2.194         | -4.732  | -1.391                    | -3.451 | -1.366                           | -3.457 |
| 0.000  | -1.368         | -3.533  | -1.368                    | -3.533 | -1.368                           | -3.533 |
| -0.002 | -0.553         | -2.366  | -1.346                    | -3.619 | -1.366                           | -3.474 |
| -0.004 | 0.252          | -1.217  | -1.326                    | -3.703 | -1.362                           | -3.346 |
| -0.006 | 1.050          | -0.076  | -1.308                    | -3.786 | -1.359                           | -3.195 |
| -0.008 | 1.843          | 1.059   | -1.292                    | -3.865 | -1.357                           | -3.039 |
| -0.010 | 2.630          | 2.194   | -1.277                    | -3.940 | -1.356                           | -2.888 |

**Table S4:** Thermal enthalpies of gallic acid and caffeic acid and their radical at 298.15 K with 6-311++G(3df,2p)

**(a) CBS-QB3**

| Electric Field<br>(a.u.) | Gallic Acid |            | Caffeic Acid |            |
|--------------------------|-------------|------------|--------------|------------|
|                          | Neutral     | Radical    | Neutral      | Radical    |
| -0.010                   | -645.60060  | -644.98759 | -647.69290   | -647.09359 |
| -0.008                   | -645.59880  | -644.98284 | -647.69140   | -647.08768 |
| -0.006                   | -645.59767  | -644.97876 | -647.69073   | -647.08288 |
| -0.004                   | -645.59719  | -644.97535 | -647.69097   | -647.07913 |
| -0.002                   | -645.59738  | -644.97261 | -647.69213   | -647.07642 |
| 0.000                    | -645.59819  | -644.97055 | -647.69422   | -647.07474 |
| 0.002                    | -645.59962  | -644.96917 | -647.69727   | -647.07410 |
| 0.004                    | -645.60168  | -644.96848 | -647.70131   | -647.07450 |
| 0.006                    | -645.60446  | -644.96849 | -647.70638   | -647.07598 |
| 0.008                    | -645.60795  | -644.96921 | -647.71253   | -647.07856 |
| 0.010                    | -645.61217  | -644.97066 | -647.71988   | -647.08231 |

**(b) B3LYP/6-311++G(3df,2p)**

| Electric Field<br>(a.u.) | Gallic Acid |            | Caffeic Acid |            |
|--------------------------|-------------|------------|--------------|------------|
|                          | Neutral     | Radical    | Neutral      | Radical    |
| -0.010                   | -646.60146  | -645.99410 | -648.74132   | -648.14782 |
| -0.008                   | -646.59976  | -645.98928 | -648.73985   | -648.14138 |
| -0.006                   | -646.59876  | -645.98518 | -648.73941   | -648.13620 |
| -0.004                   | -646.59846  | -645.98179 | -648.74002   | -648.13223 |
| -0.002                   | -646.59886  | -645.97913 | -648.74168   | -648.12946 |
| 0.000                    | -646.59998  | -645.97719 | -648.74441   | -648.12787 |
| 0.002                    | -646.60182  | -645.97597 | -648.74826   | -648.12748 |
| 0.004                    | -646.60441  | -645.97549 | -648.75325   | -648.12830 |
| 0.006                    | -646.60775  | -645.97577 | -648.75945   | -648.13035 |
| 0.008                    | -646.61186  | -645.97682 | -648.76691   | -648.13368 |
| 0.010                    | -646.61676  | -645.97864 | -648.77572   | -648.13834 |

**(c) M06-2X/6-311++G(3df,2p)**

| Electric Field<br>(a.u.) | Gallic Acid |            | Caffeic Acid |            |
|--------------------------|-------------|------------|--------------|------------|
|                          | Neutral     | Radical    | Neutral      | Radical    |
| -0.010                   | -646.35776  | -645.74533 | -648.48125   | -647.88151 |
| -0.008                   | -646.35603  | -645.74059 | -648.47979   | -647.87541 |
| -0.006                   | -646.35494  | -645.73652 | -648.47935   | -647.87047 |
| -0.004                   | -646.35450  | -645.73313 | -648.47987   | -647.86666 |
| -0.002                   | -646.35473  | -645.73041 | -648.48128   | -647.86396 |
| 0.000                    | -646.35563  | -645.72837 | -648.48370   | -647.86234 |
| 0.002                    | -646.35723  | -645.72704 | -648.48714   | -647.86185 |
| 0.004                    | -646.35952  | -645.72641 | -648.49160   | -647.86248 |
| 0.006                    | -646.36252  | -645.72649 | -648.49716   | -647.86425 |
| 0.008                    | -646.36625  | -645.72732 | -648.50386   | -647.86723 |
| 0.010                    | -646.37073  | -645.72890 | -648.51179   | -647.87146 |

**(d) LC-BLYP/6-311++G(3df,2p)**

| Electric Field<br>(a.u.) | Gallic Acid |            | Caffeic Acid |            |
|--------------------------|-------------|------------|--------------|------------|
|                          | Neutral     | Radical    | Neutral      | Radical    |
| -0.010                   | -645.10200  | -644.49392 | -647.12101   | -646.52694 |
| -0.008                   | -645.10019  | -644.48908 | -647.11963   | -646.52105 |
| -0.006                   | -645.09901  | -644.48490 | -647.11918   | -646.51624 |
| -0.004                   | -645.09848  | -644.48139 | -647.11963   | -646.51248 |
| -0.002                   | -645.09859  | -644.47854 | -647.12099   | -646.50974 |
| 0.000                    | -645.09935  | -644.47635 | -647.12328   | -646.50803 |
| 0.002                    | -645.10077  | -644.47484 | -647.12653   | -646.50735 |
| 0.004                    | -645.10291  | -644.47401 | -647.13075   | -646.50769 |
| 0.006                    | -645.10568  | -644.47386 | -647.13599   | -646.50909 |
| 0.008                    | -645.10915  | -644.47442 | -647.14230   | -646.51158 |
| 0.010                    | -645.11334  | -644.47568 | -647.14973   | -646.51522 |



**(e) LC- $\omega$ PBE/6-311++G(3df,2p)**

| Electric Field<br>(a.u.) | Gallic Acid |            | Caffeic Acid |            |
|--------------------------|-------------|------------|--------------|------------|
|                          | Neutral     | Radical    | Neutral      | Radical    |
| -0.010                   | -646.17553  | -645.56312 | -648.29168   | -647.69200 |
| -0.008                   | -646.17372  | -645.55834 | -648.29018   | -647.68611 |
| -0.006                   | -646.17256  | -645.55422 | -648.28963   | -647.68130 |
| -0.004                   | -646.17204  | -645.55078 | -648.29003   | -647.67756 |
| -0.002                   | -646.17218  | -645.54800 | -648.29136   | -647.67486 |
| 0.000                    | -646.17298  | -645.54589 | -648.29362   | -647.67319 |
| 0.002                    | -646.17445  | -645.54447 | -648.29685   | -647.67255 |
| 0.004                    | -646.17660  | -645.54373 | -648.30107   | -647.67296 |
| 0.006                    | -646.17944  | -645.54368 | -648.30633   | -647.67443 |
| 0.008                    | -646.18298  | -645.54433 | -648.31266   | -647.67701 |
| 0.010                    | -646.18724  | -645.54570 | -648.32015   | -647.68073 |

**(f)  $\omega$ B97/6-311++G(3df,2p)**

| Electric Field<br>(a.u.) | Gallic Acid |            | Caffeic Acid |            |
|--------------------------|-------------|------------|--------------|------------|
|                          | Neutral     | Radical    | Neutral      | Radical    |
| -0.010                   | -646.48914  | -645.88087 | -648.61610   | -648.02062 |
| -0.008                   | -646.48733  | -645.87604 | -648.61461   | -648.01465 |
| -0.006                   | -646.48620  | -645.87192 | -648.61407   | -648.00980 |
| -0.004                   | -646.48572  | -645.86851 | -648.61441   | -648.00601 |
| -0.002                   | -646.48585  | -645.86580 | -648.61571   | -648.00330 |
| 0.000                    | -646.48662  | -645.86379 | -648.61798   | -648.00165 |
| 0.002                    | -646.48812  | -645.86244 | -648.62122   | -648.00105 |
| 0.004                    | -646.49030  | -645.86172 | -648.62548   | -648.00153 |
| 0.006                    | -646.49315  | -645.86170 | -648.63078   | -648.00309 |
| 0.008                    | -646.49672  | -645.86244 | -648.63720   | -648.00577 |
| 0.010                    | -646.50105  | -645.86393 | -648.64481   | -648.00964 |

**(g)  $\omega$ B97X/6-311++G(3df,2p)**

| Electric Field<br>(a.u.) | Gallic Acid |            | Caffeic Acid |            |
|--------------------------|-------------|------------|--------------|------------|
|                          | Neutral     | Radical    | Neutral      | Radical    |
| -0.010                   | -646.43287  | -645.82373 | -648.56253   | -647.96594 |
| -0.008                   | -646.43108  | -645.81887 | -648.56108   | -647.95992 |
| -0.006                   | -646.42999  | -645.81473 | -648.56056   | -647.95504 |
| -0.004                   | -646.42957  | -645.81129 | -648.56096   | -647.95123 |
| -0.002                   | -646.42977  | -645.80857 | -648.56233   | -647.94850 |
| 0.000                    | -646.43061  | -645.80657 | -648.56468   | -647.94686 |
| 0.002                    | -646.43218  | -645.80527 | -648.56802   | -647.94631 |
| 0.004                    | -646.43447  | -645.80462 | -648.57238   | -647.94685 |
| 0.006                    | -646.43741  | -645.80461 | -648.57780   | -647.94848 |
| 0.008                    | -646.44105  | -645.80535 | -648.58435   | -647.95122 |
| 0.010                    | -646.44544  | -645.80686 | -648.59209   | -647.95514 |

**(h)  $\omega$ B97XD/6-311++G(3df,2p)**

| Electric Field<br>(a.u.) | Gallic Acid |            | Caffeic Acid |            |
|--------------------------|-------------|------------|--------------|------------|
|                          | Neutral     | Radical    | Neutral      | Radical    |
| -0.010                   | -646.38328  | -645.77284 | -648.51478   | -647.91661 |
| -0.008                   | -646.38155  | -645.76792 | -648.51326   | -647.91047 |
| -0.006                   | -646.38054  | -645.76375 | -648.51280   | -647.90550 |
| -0.004                   | -646.38023  | -645.76030 | -648.51331   | -647.90165 |
| -0.002                   | -646.38052  | -645.75759 | -648.51480   | -647.89890 |
| 0.000                    | -646.38148  | -645.75560 | -648.51729   | -647.89725 |
| 0.002                    | -646.38322  | -645.75437 | -648.52080   | -647.89674 |
| 0.004                    | -646.38567  | -645.75387 | -648.52536   | -647.89737 |
| 0.006                    | -646.38872  | -645.75398 | -648.53100   | -647.89918 |
| 0.008                    | -646.39248  | -645.75475 | -648.53780   | -647.90214 |
| 0.010                    | -646.39701  | -645.75634 | -648.54585   | -647.90623 |

**(i) M11/6-311++G(3df,2p)**

| Electric Field<br>(a.u.) | Gallic Acid |            | Caffeic Acid |            |
|--------------------------|-------------|------------|--------------|------------|
|                          | Neutral     | Radical    | Neutral      | Radical    |
| -0.010                   | -646.33199  | -645.71878 | -648.43293   | -647.83310 |
| -0.008                   | -646.33013  | -645.71391 | -648.43138   | -647.82699 |
| -0.006                   | -646.32892  | -645.70973 | -648.43085   | -647.82201 |
| -0.004                   | -646.32837  | -645.70622 | -648.43233   | -647.81814 |
| -0.002                   | -646.32848  | -645.70341 | -648.43265   | -647.81536 |
| 0.000                    | -646.32927  | -645.70127 | -648.43496   | -647.81365 |
| 0.002                    | -646.33075  | -645.69983 | -648.43828   | -647.81302 |
| 0.004                    | -646.33293  | -645.69909 | -648.44261   | -647.81349 |
| 0.006                    | -646.33582  | -645.69907 | -648.44801   | -647.81507 |
| 0.008                    | -646.33944  | -645.69978 | -648.45452   | -647.81782 |
| 0.010                    | -646.34380  | -645.70123 | -648.46222   | -647.82177 |

**(j) CAMB3LYP/6-311++G(3df,2p)**

| Electric Field<br>(a.u.) | Gallic Acid |            | Caffeic Acid |            |
|--------------------------|-------------|------------|--------------|------------|
|                          | Neutral     | Radical    | Neutral      | Radical    |
| -0.010                   | -646.34046  | -645.73274 | -648.45017   | -647.85586 |
| -0.008                   | -646.33871  | -645.72792 | -648.44874   | -647.84973 |
| -0.006                   | -646.33762  | -645.72379 | -648.44827   | -647.84475 |
| -0.004                   | -646.33720  | -645.72035 | -648.44878   | -647.84091 |
| -0.002                   | -646.33746  | -645.71760 | -648.45027   | -647.83817 |
| 0.000                    | -646.33841  | -645.71554 | -648.45276   | -647.83654 |
| 0.002                    | -646.34005  | -645.71419 | -648.45628   | -647.83600 |
| 0.004                    | -646.34239  | -645.71354 | -648.46086   | -647.83658 |
| 0.006                    | -646.34545  | -645.71361 | -648.46655   | -647.83830 |
| 0.008                    | -646.34925  | -645.71441 | -648.47340   | -647.84120 |
| 0.010                    | -646.35379  | -645.71595 | -648.48149   | -647.84534 |

**Table S5:** O-H bond lengths (Å) of gallic and caffeic acids in presence of varying electric field (in a.u.) along C-O directions in different level of theory.

| Electric field      | B3LYP              | M06-2X | LC-BLYP | LC- $\omega$ PBE | $\omega$ B97 | $\omega$ B97X | $\omega$ B97XD | M11    | CAM-B3LYP |
|---------------------|--------------------|--------|---------|------------------|--------------|---------------|----------------|--------|-----------|
|                     | <b>Gallic Acid</b> |        |         |                  |              |               |                |        |           |
| 0.010               | 0.9640             | 0.9626 | 0.9638  | 0.9621           | 0.9628       | 0.9610        | 0.9600         | 0.9637 | 0.9628    |
| 0.008               | 0.9641             | 0.9627 | 0.9639  | 0.9621           | 0.9628       | 0.9611        | 0.9600         | 0.9638 | 0.9629    |
| 0.006               | 0.9642             | 0.9628 | 0.9640  | 0.9622           | 0.9630       | 0.9612        | 0.9601         | 0.9638 | 0.9629    |
| 0.004               | 0.9643             | 0.9629 | 0.9641  | 0.9623           | 0.9631       | 0.9613        | 0.9603         | 0.9640 | 0.9631    |
| 0.002               | 0.9645             | 0.9631 | 0.9644  | 0.9625           | 0.9632       | 0.9615        | 0.9604         | 0.9641 | 0.9633    |
| 0.000               | 0.9647             | 0.9634 | 0.9646  | 0.9627           | 0.9635       | 0.9618        | 0.9607         | 0.9643 | 0.9635    |
| -0.002              | 0.9650             | 0.9637 | 0.9649  | 0.9630           | 0.9638       | 0.9620        | 0.9610         | 0.9646 | 0.9638    |
| -0.004              | 0.9654             | 0.9641 | 0.9653  | 0.9633           | 0.9641       | 0.9624        | 0.9612         | 0.9650 | 0.9642    |
| -0.006              | 0.9659             | 0.9645 | 0.9658  | 0.9637           | 0.9645       | 0.9627        | 0.9616         | 0.9654 | 0.9646    |
| -0.008              | 0.9664             | 0.9650 | 0.9663  | 0.9642           | 0.9650       | 0.9632        | 0.9620         | 0.9658 | 0.9651    |
| -0.010              | 0.9670             | 0.9656 | 0.9669  | 0.9647           | 0.9655       | 0.9637        | 0.9625         | 0.9664 | 0.9657    |
| <b>Caffeic Acid</b> |                    |        |         |                  |              |               |                |        |           |
| 0.010               | 0.9600             | 0.9582 | 0.9583  | 0.9572           | 0.9582       | 0.9566        | 0.9557         | 0.9586 | 0.95821   |
| 0.008               | 0.9601             | 0.9584 | 0.9585  | 0.9574           | 0.9583       | 0.9567        | 0.9559         | 0.9588 | 0.95839   |
| 0.006               | 0.9604             | 0.9586 | 0.9588  | 0.9576           | 0.9586       | 0.9570        | 0.9561         | 0.9591 | 0.95863   |
| 0.004               | 0.9606             | 0.9590 | 0.9591  | 0.9579           | 0.9589       | 0.9572        | 0.9563         | 0.9594 | 0.95891   |
| 0.002               | 0.9610             | 0.9593 | 0.9595  | 0.9582           | 0.9592       | 0.9576        | 0.9566         | 0.9597 | 0.95928   |
| 0.000               | 0.9614             | 0.9597 | 0.9600  | 0.9586           | 0.9596       | 0.9579        | 0.9570         | 0.9601 | 0.95968   |
| -0.002              | 0.9619             | 0.9602 | 0.9605  | 0.9591           | 0.9601       | 0.9584        | 0.9575         | 0.9606 | 0.96017   |
| -0.004              | 0.9624             | 0.9608 | 0.9611  | 0.9596           | 0.9606       | 0.9589        | 0.9580         | 0.9612 | 0.96073   |
| -0.006              | 0.9631             | 0.9614 | 0.9618  | 0.9602           | 0.9612       | 0.9595        | 0.9586         | 0.9618 | 0.96303   |
| -0.008              | 0.9639             | 0.9622 | 0.9626  | 0.9609           | 0.9619       | 0.9602        | 0.9592         | 0.9626 | 0.96215   |
| -0.010              | 0.9648             | 0.9630 | 0.9635  | 0.9617           | 0.9627       | 0.9610        | 0.9601         | 0.9634 | 0.96303   |

**Figure S1:** Change of dipole moment vector with the external electric field

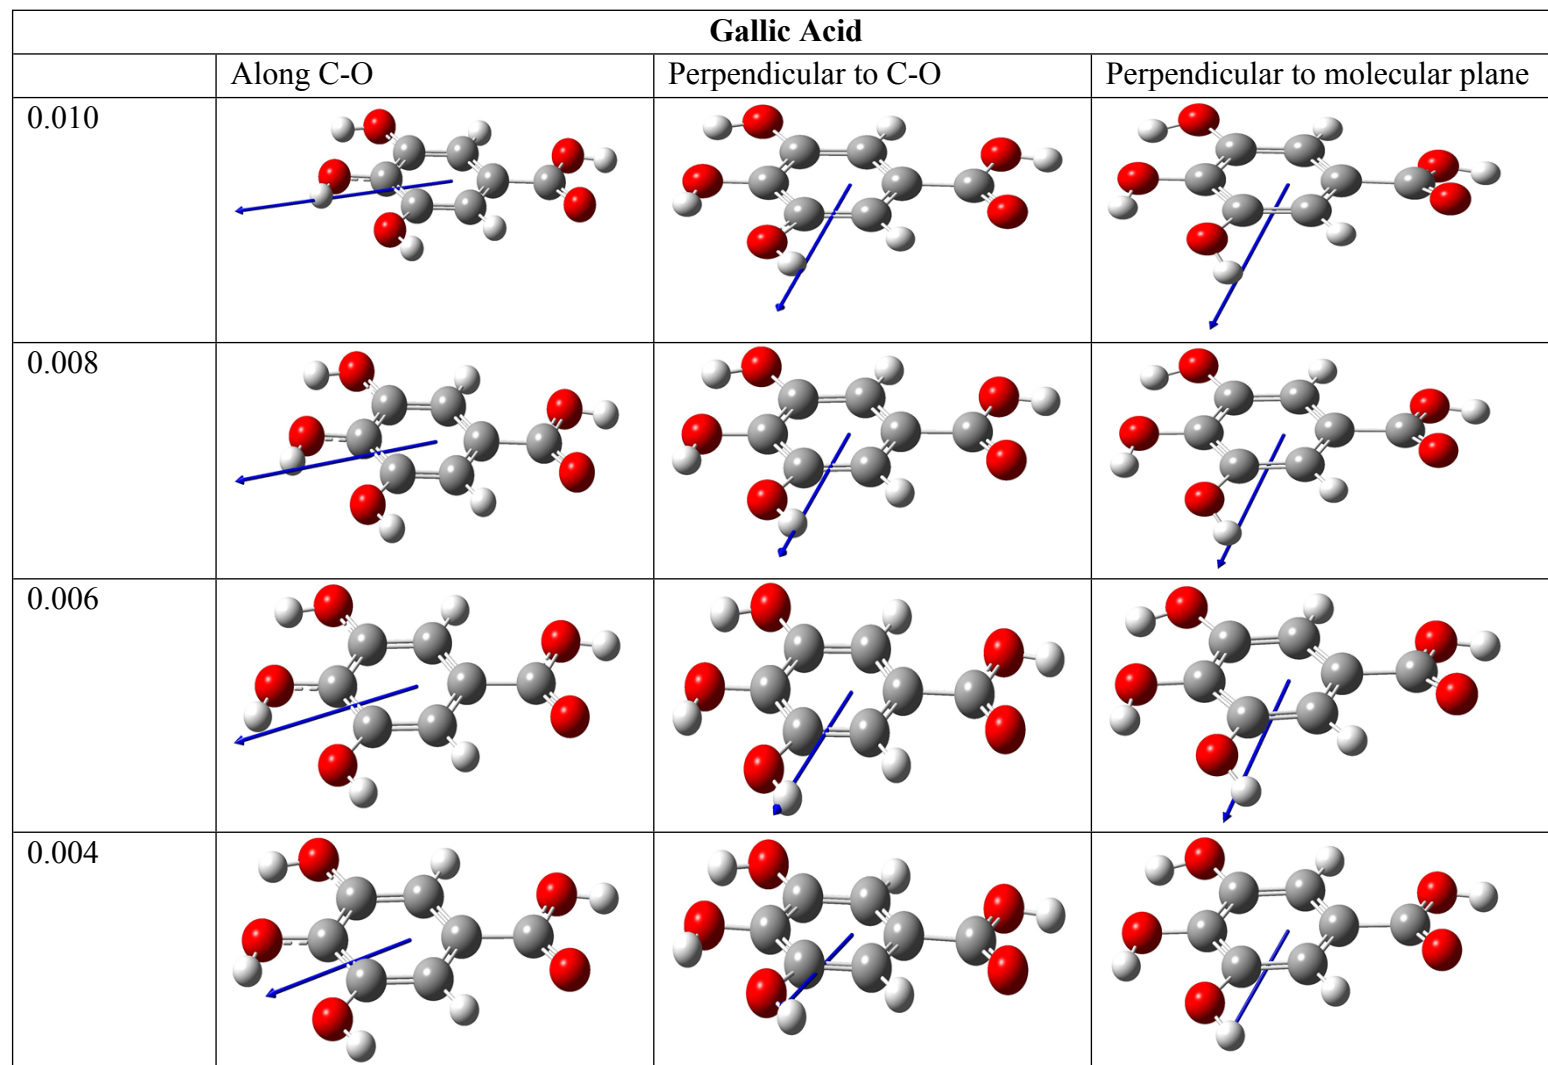

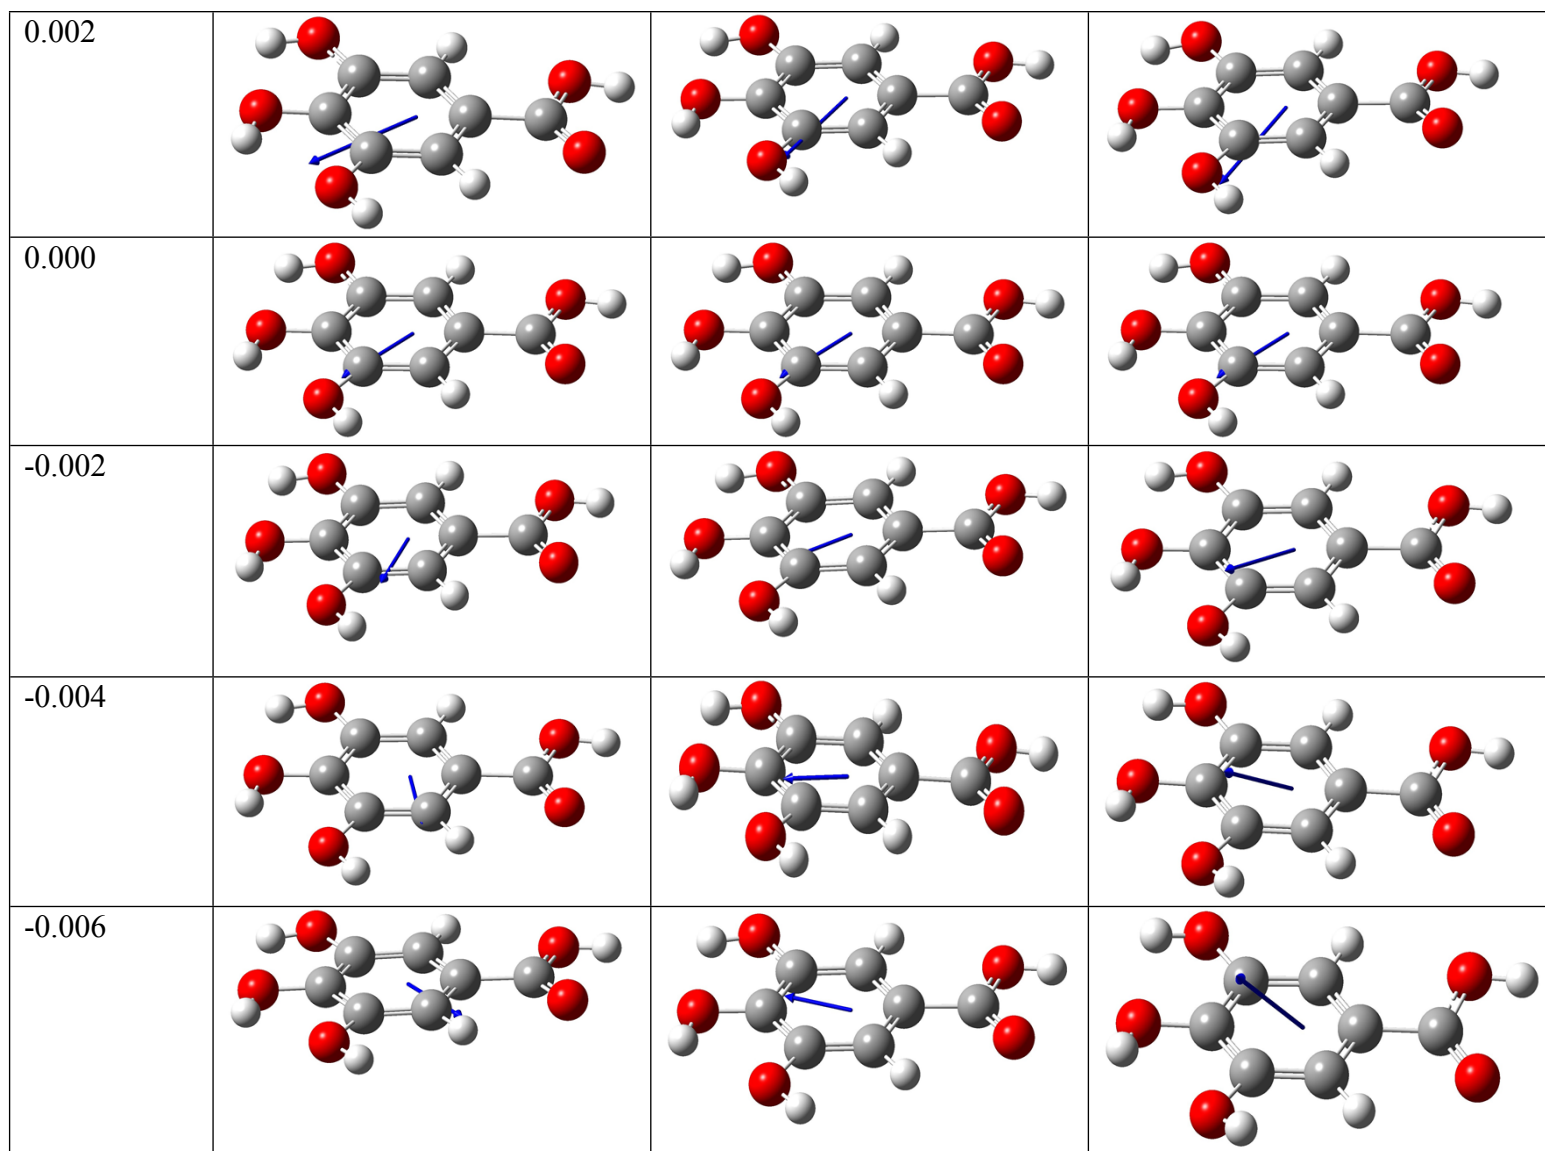

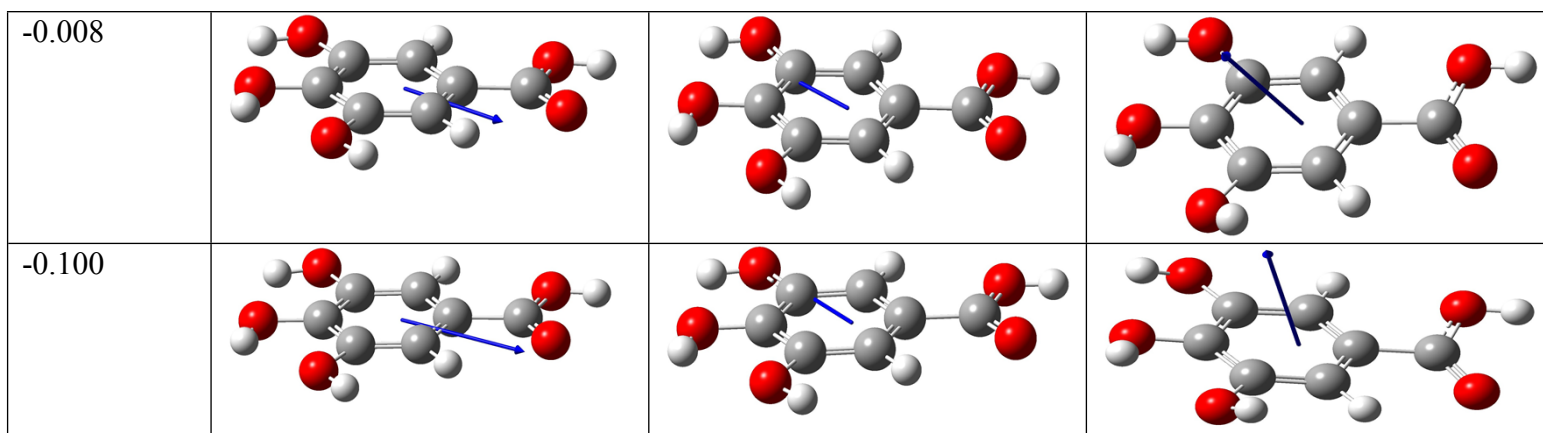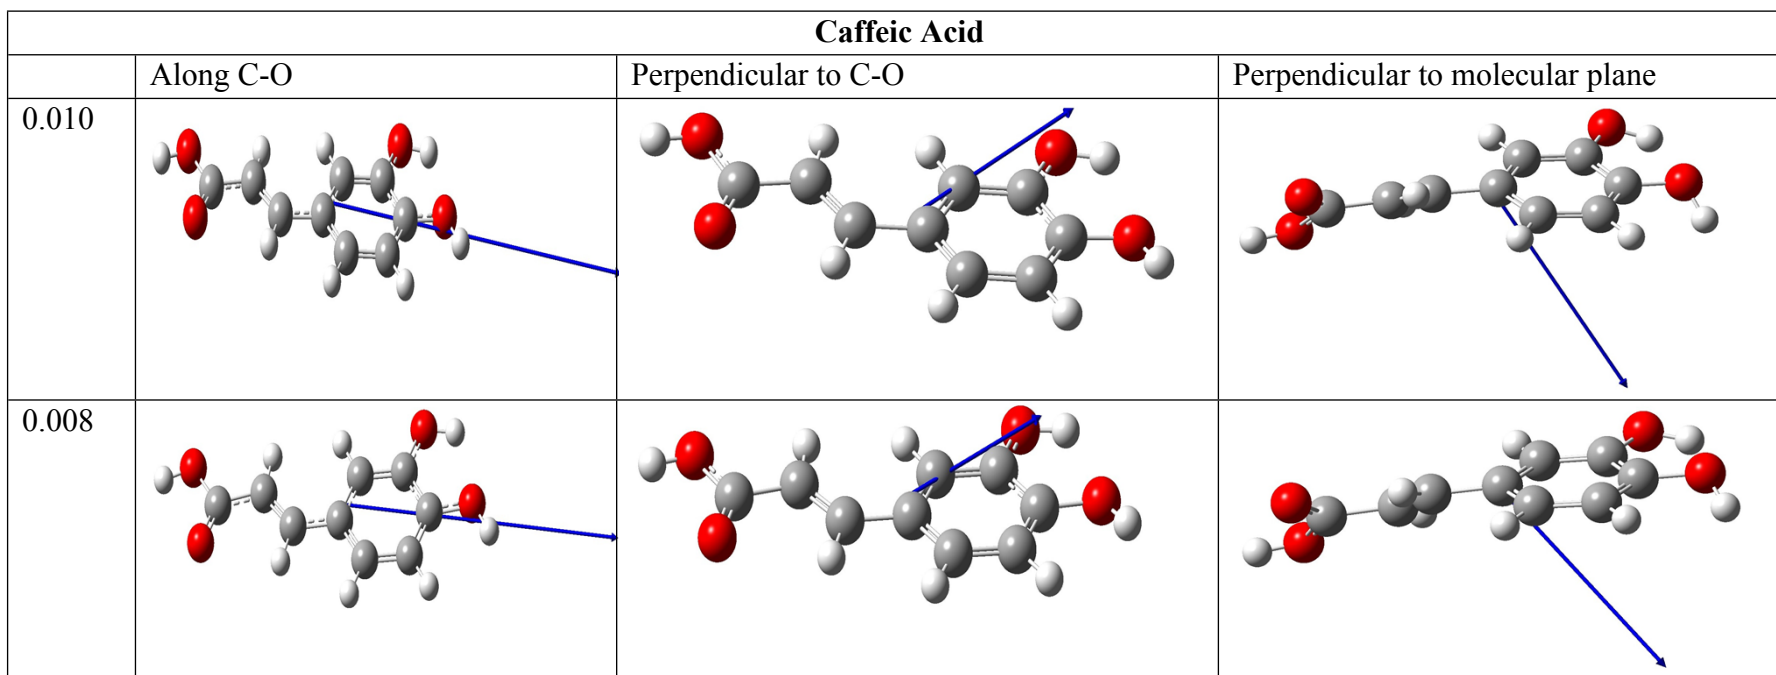

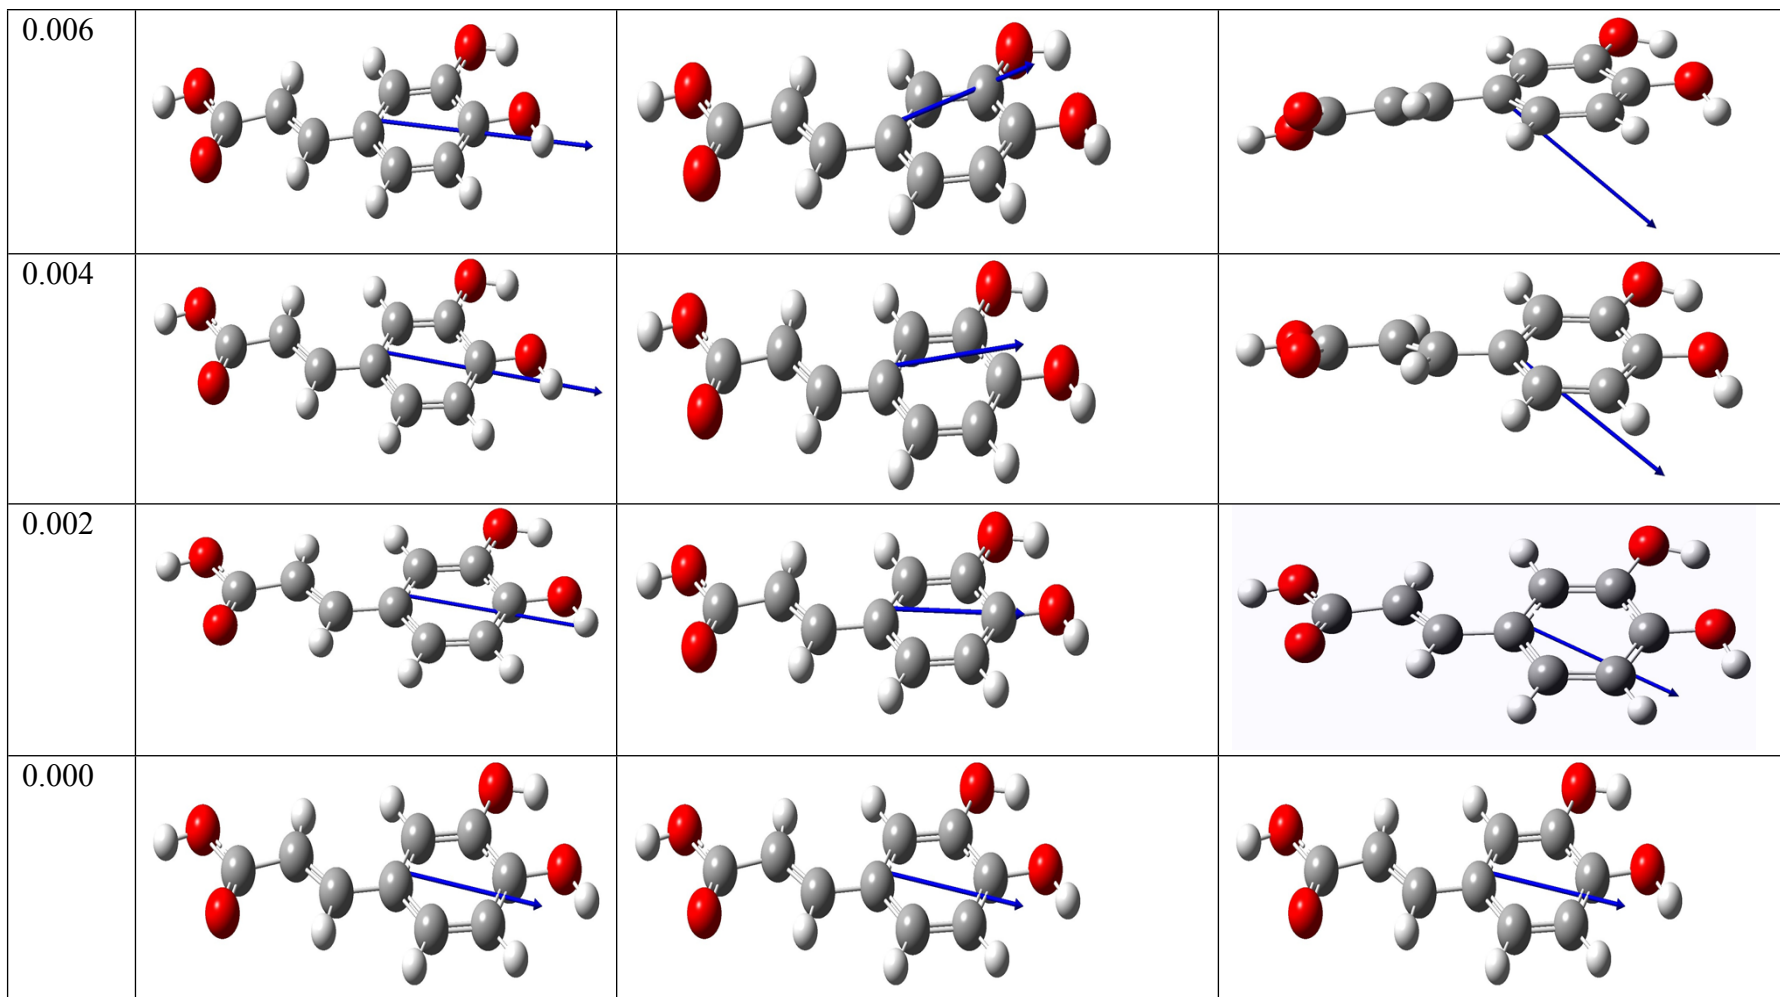



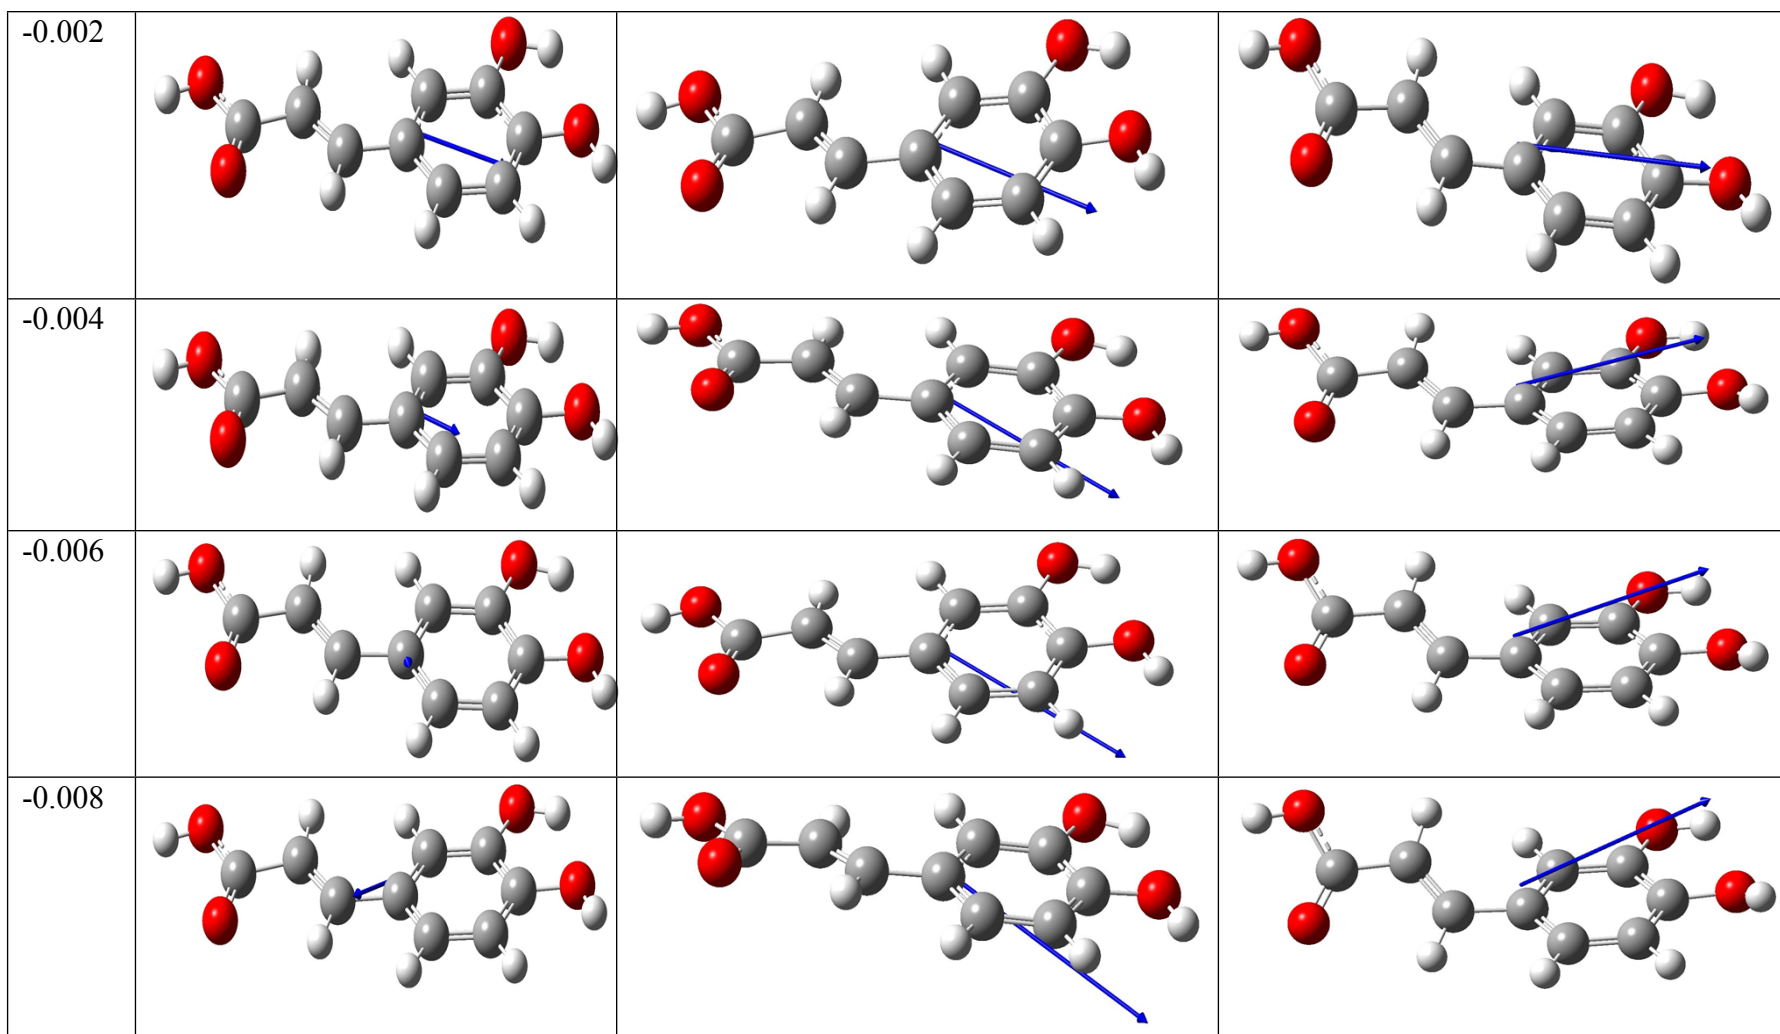

-0.100

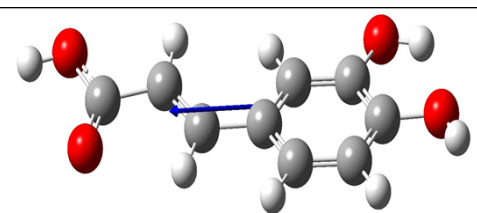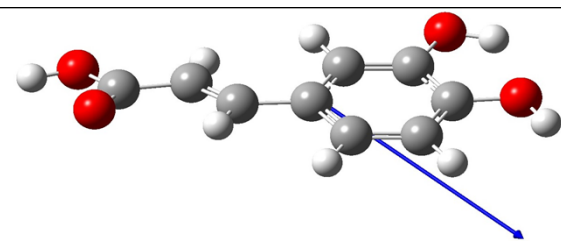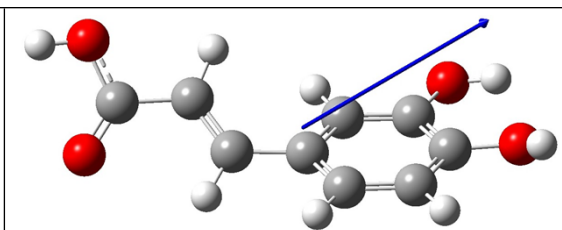

Supplement: c5ra13462e1.pdf [file c5ra13462e1.pdf]
